# Supplementary material for: Culex quinquefasciatus Resistant to the Binary Toxin from Lysinibacillus sphaericus Displays a Consistent Downregulation of Pantetheinase Transcripts
Source: MDPI journal article supplement (doi:10.3390/biom14010033), 2023-12-25

**Table S1.** Primers used to perform the RT-qPCR reactions to evaluate the expression of *Culex quinquefasciatus* genes.

| Gene ID <sup>1</sup>       | Amplicon (bp) | Primers (5'-3') <sup>2</sup>                         | Blast verification (first and second hits)                     |                |               |          |       |
|----------------------------|---------------|------------------------------------------------------|----------------------------------------------------------------|----------------|---------------|----------|-------|
|                            |               |                                                      | Description ( <i>Culex quinquefasciatus</i> taxid:7176)        | Accession      | % Query cover | E. value | % ID  |
| <i>18S</i>                 | 159           | F CGCGGTAATTCCAGCTCCACTA                             | NA                                                             | NA             | NA            | NA       | NA    |
|                            |               | R GCATCAAGCGCCACCATATAGG                             | NA                                                             | NA             | NA            | NA       | NA    |
| CPIJ013173 ( <i>cqm1</i> ) | 228           | F GAACCGGACTCGAAGGACTG<br>R CTCCGGCTGAATATCGTAGAAATC | maltase 2 (LOC6046508)                                         | XM_001863660.2 | 100           | 4e-04    | 100   |
|                            |               |                                                      | protein AF-9 (LOC6034974)                                      | XM_038260469.1 | 80            | 0.092    | 100   |
|                            |               |                                                      | maltase 2 (LOC6046508)                                         | XM_001863660.2 | 100           | 0.14     | 91.67 |
|                            |               |                                                      | maltase A1 (LOC6037642)                                        | XM_001847477.2 | 100           | 0.14     | 91.67 |
| CPIJ017593 ( <i>pan</i> )  | 228           | F TCTTTGCCTGCACCGGGACCA<br>R CGAATGGTTTGCCATCCTTCGT  | vanin-like protein 1 (LOC6040365)                              | XM_001849713.2 | 100           | 0.027    | 95.24 |
|                            |               |                                                      | Y+L amino acid transporter 2 (LOC6051251)                      | XM_038255127.1 | 71            | 0.43     | 100   |
|                            |               |                                                      | vanin-like protein 1 (LOC6040365)                              | XM_001849713.2 | 100           | 3e-05    | 100   |
|                            |               |                                                      | LOW QUALITY PROTEIN: (LOC6035613)                              | XM_038259122.1 | 68            | 6.6      | 100   |
| CPIJ012066 ( <i>NaCl</i> ) | 214           | F GAAGTTGTGACCTTTGCTTG<br>R ATCCGAATGCGTACATCC       | sodium-dependent nutrient amino acid transporter1 (LOC6045025) | XM_001862410.2 | 100           | 4e-04    | 100   |
|                            |               |                                                      | peroxisomal membrane protein 11C (LOC6042422)                  | XM_001851490.2 | 80            | 0.092    | 100   |
|                            |               |                                                      | sodium-dependent nutrient amino acid transporter1 (LOC6045025) | XM_001862410.2 | 100           | 0.004    | 100   |
|                            |               |                                                      | sodium-dependent nutrient amino acid transporter1 (LOC6045026) | XM_038254677.1 | 100           | 0.96     | 94.44 |
| CPIJ010801 ( <i>cbB</i> )  | 196           | F ATTGATGTCGCAAATCGTGG<br>R CGGCTTCAATTGCTTCAAC      | carboxypeptidase B (LOC6043137)                                | XM_001856118.2 | 100           | 4e-04    | 100   |
|                            |               |                                                      | carboxypeptidase B (LOC6043138)                                | XM_001856123.2 | 95            | 0.36     | 94.74 |
|                            |               |                                                      | carboxypeptidase B (LOC6043137)                                | XM_001856118.2 | 100           | 19       | 100   |
|                            |               |                                                      | carboxypeptidase B (LOC6043138)                                | XM_001856123.2 | 100           | 19       | 100   |
| CPIJ002522 ( <i>far</i> )  | 211           | F GAGGCTTATCAGTCGATGAA<br>R GGCTGATGCTGGTAACCTTC     | farnesol dehydrogenase (LOC6033789)                            | XM_001844139.2 | 100           | 4e-04    | 100   |
|                            |               |                                                      | multidrug resistance-associated protein 7 (LOC6035986)         | XM_038253057.1 | 80            | 5.7      | 100   |
|                            |               |                                                      | farnesol dehydrogenase (LOC6033789)                            | XM_001844139.2 | 100           | 4e-04    | 100   |
|                            |               |                                                      | sorting nexin-8 transcript variant X2 (LOC6037692)             | XM_038254173.1 | 80            | 0.092    | 100   |

<sup>1</sup> *18S*: ribosomal protein control gene [1]. *cqm1*: *Culex quinquefasciatus* maltase 1 [2]. *pan* : pantetheinase [2]. *NaCl*: sodium/chloride dependent amino acid transporter, putative. *cbB*: carboxypeptidase B precursor. *far*: farnesol dehydrogenase. NA: Not Applicable

<sup>2</sup> Primers forward (F) and reverse (R) were designed using PrimerSelect (DNASTAR) based on the sequences obtained in the VectorBase platform ([www.vectorbase.org](http://www.vectorbase.org)).

## Reference cited

1. Liu, Y.; Zhang, H.; Qiao, C.; Lu, X.; Cui, F. Correlation between carboxylesterase alleles and insecticide resistance in *Culex pipiens* complex from China. *Parasit Vectors* **2011**, *4*, 236, doi:10.1186/1756-3305-4-236.
2. Rezende, T.M.T., Rezende, A.M., Luz Wallau, G., Santos Vasconcelos, C.R., de-Melo-Neto, O.P., Silva-Filha, M., Romao, T.P. A differential transcriptional profile by *Culex quinquefasciatus* larvae resistant to *Lysinibacillus sphaericus* IAB59 highlights genes and pathways associated with the resistance phenotype. *Parasit Vectors* **2019**, *12*, 407, doi:10.1186/s13071-019-3661-y.

**Tabela S2.** Statistics for the sequenced RNA-seq libraries of *Culex quinquefasciatus* larvae from two Bin-resistant strains (REC, REC-2) compared to a susceptible one (S).

|                 | REC                         |      | S                           |      | REC-2                       |      | S                           |      |
|-----------------|-----------------------------|------|-----------------------------|------|-----------------------------|------|-----------------------------|------|
| Reads total     | 6,256,898                   |      | 8,275,658                   |      | 6,230,726                   |      | 9,220,190                   |      |
|                 | Reads<br>(10 <sup>6</sup> ) | %    |
| Mapping results |                             |      |                             |      |                             |      |                             |      |
| Total mapped    | 6.13                        | 98.1 | 8.12                        | 98.9 | 6.17                        | 99.1 | 9.12                        | 99   |
| Unique mapped   | 3.23                        | 51.6 | 5.56                        | 66.1 | 3.39                        | 53.1 | 6.44                        | 69.6 |
| Multiple        |                             |      |                             |      |                             |      |                             |      |
| mapped          | 1.68                        | 26.7 | 1.92                        | 24.4 | 1.13                        | 17.3 | 1.96                        | 21.5 |
| Unmapped        | 1.21                        | 13.0 | 0.69                        | 8.30 | 1.64                        | 18.7 | 0.72                        | 7.9  |

**Table S3.** Dataset Principal Component Analysis (PCA) of the expression profile generated by RNA-seq comparing the *Culex quinquefasciatus* larvae from two Bin-resistant strains (REC and REC-2) and the susceptible strain (S). REC (replicates A11. A12. A13) was compared to S (replicates S1, S2, S3). REC-2 (replicates A21. A22. A23) was compared to S (replicates S1, S2, S3).

| Comparison REC X S     | Coordinates of the graph |            |            |            |            |           |
|------------------------|--------------------------|------------|------------|------------|------------|-----------|
|                        | PC1                      | PC2        | PC3        | PC4        | PC5        | PC6       |
| A11.counts             | -19,008683               | 7,52328523 | 1,92914547 | 10,324726  | -4,4878443 | 4,61E-14  |
| A12.counts             | -20,809536               | 6,56798523 | -11,786851 | -3,5778055 | 3,15522284 | 4,79E-14  |
| A13.counts             | -25,631937               | 2,70355081 | 10,4716906 | -7,0682654 | 1,66164114 | 4,50E-14  |
| S1_S4.counts           | 19,6586423               | -7,0430559 | 1,6491045  | 5,30234012 | 9,03386132 | 2,30E-14  |
| S2_S5.counts           | -5,3914479               | -17,438324 | -2,5314232 | -1,6144919 | -5,7370166 | 4,18E-14  |
| S3_S6.counts           | 51,1829622               | 7,6865582  | 0,26833403 | -3,3665034 | -3,6258644 | -2,56E-14 |
|                        | PCA statistics           |            |            |            |            |           |
|                        | PC1                      | PC2        | PC3        | PC4        | PC5        | PC6       |
| Standard deviation     | 29,9552619               | 10,1963756 | 7,23197653 | 6,50254988 | 5,66618269 | 4,79E-14  |
| Proportion of Variance | 0,79551                  | 0,09217    | 0,04637    | 0,03749    | 0,02846    | 0         |
| Cumulative Proportion  | 0,79551                  | 0,88768    | 0,93405    | 0,97154    | 1          | 1         |
| Comparison REC-2 X S   | Coordinates of the graph |            |            |            |            |           |
|                        | PC1                      | PC2        | PC3        | PC4        | PC5        | PC6       |
| A21.counts             | -48,512778               | 9,65931203 | 8,53835823 | 8,54725255 | -0,4947761 | 1,05E-13  |
| A22.counts             | -1,7371684               | -6,9022345 | -19,698955 | 6,63621501 | 2,22477578 | 6,12E-14  |
| A23.counts             | -37,402016               | -1,1397208 | -3,9574395 | -13,409359 | -2,1662717 | 4,40E-14  |
| S1.counts              | 22,1818052               | -0,4888534 | 7,45212784 | -2,6538512 | 12,3183715 | 1,20E-14  |
| S2.counts              | 18,6677042               | -16,97695  | 10,3822533 | 2,04959256 | -6,4584405 | -2,31E-14 |
| S3.counts              | 46,8024537               | 15,8484469 | -2,7163452 | -1,16985   | -5,4236589 | -6,69E-14 |
|                        | PCA statistics           |            |            |            |            |           |
|                        | PC1                      | PC2        | PC3        | PC4        | PC5        | PC6       |
| Standard deviation     | 36,8412909               | 11,6779382 | 11,378204  | 7,86788521 | 6,82285822 | 7,29E-14  |
| Proportion of Variance | 0,78384                  | 0,07876    | 0,07477    | 0,03575    | 0,02688    | 0         |
| Cumulative Proportion  | 0,78384                  | 0,8626     | 0,93737    | 0,97312    | 1          | 1         |

**Table S4.** Differentially expressed genes from the *Culex quinquefasciatus* Bin-resistant strains (REC and REC-2), compared to a susceptible strain (S).**(A)** REC X S up and down regulated genes.

| ID         | Description                                                | Uniprot Annotation                 | log2FoldChange | padj  | baseMean | lfcSE | stat    | pvalue    |
|------------|------------------------------------------------------------|------------------------------------|----------------|-------|----------|-------|---------|-----------|
| CPIJ017593 | pantetheinase precursor                                    |                                    | -8,776         | 0,000 | 55,426   | 1,213 | -7,236  | 4,630E-13 |
| CPIJ018744 | ankyrin 2,3/unc44                                          |                                    | -8,446         | 0,000 | 44,418   | 1,227 | -6,882  | 5,883E-12 |
| CPIJ012700 | CHKov1, putative                                           |                                    | -7,933         | 0,000 | 31,080   | 1,223 | -6,488  | 8,674E-11 |
| CPIJ017592 | Vanin-like protein 1 precursor, putative                   |                                    | -7,866         | 0,000 | 29,438   | 1,221 | -6,445  | 1,159E-10 |
| CPIJ003695 | glucosyl/glucuronosyl transferases                         |                                    | -7,752         | 0,000 | 53,136   | 1,216 | -6,376  | 1,819E-10 |
| CPIJ012697 | Putative uncharacterized protein                           | CHK kinase-like domain-containing  | -7,455         | 0,000 | 22,391   | 1,234 | -6,041  | 1,536E-09 |
| CPIJ014435 | Putative uncharacterized protein                           | Cuticle protein                    | -6,947         | 0,000 | 15,229   | 1,260 | -5,515  | 3,491E-08 |
| CPIJ014889 | Pyruvate dehydrogenase E1 component subunit alpha          |                                    | -6,721         | 0,000 | 13,540   | 1,261 | -5,331  | 9,778E-08 |
| CPIJ005154 | Nuclear transport factor 2                                 |                                    | -6,720         | 0,000 | 13,461   | 1,246 | -5,394  | 6,879E-08 |
| CPIJ012840 | 39S ribosomal protein L24, mitochondrial precursor         |                                    | -6,549         | 0,000 | 12,008   | 1,253 | -5,226  | 1,734E-07 |
| CPIJ013173 | Neutral and basic amino acid transport protein rBAT        | Culex quinquefasciatus maltase 1   | -5,840         | 0,000 | 712,368  | 0,309 | -18,910 | 9,354E-80 |
| CPIJ012702 | Putative uncharacterized protein                           | CHK kinase-like domain-containing  | -5,686         | 0,000 | 6,328    | 1,280 | -4,442  | 8,903E-06 |
| CPIJ007230 | Regucalcin                                                 |                                    | -5,522         | 0,000 | 5,995    | 1,287 | -4,292  | 1,768E-05 |
| CPIJ019851 | Myosin i                                                   |                                    | -5,219         | 0,001 | 4,886    | 1,288 | -4,053  | 5,067E-05 |
| CPIJ018693 | Hyp37.3 putative secreted salivary gland protein           |                                    | -5,205         | 0,000 | 34,821   | 0,815 | -6,390  | 1,663E-10 |
| CPIJ016041 | Putative uncharacterized protein                           | CsbD family protein                | -5,153         | 0,001 | 4,684    | 1,296 | -3,976  | 7,006E-05 |
| CPIJ006734 | DNA-directed RNA polymerase II 16 kDa polypeptide          |                                    | -4,975         | 0,002 | 8,130    | 1,270 | -3,918  | 8,945E-05 |
| CPIJ015938 | Putative uncharacterized protein                           |                                    | -4,956         | 0,003 | 4,160    | 1,306 | -3,796  | 1,472E-04 |
| CPIJ008878 | prolylcarboxypeptidase, putative                           |                                    | -4,814         | 0,003 | 6,985    | 1,275 | -3,776  | 1,596E-04 |
| CPIJ005644 | protein lethal(2)essential for life                        |                                    | -4,809         | NA    | 90,328   | 1,811 | -2,655  | NA        |
| CPIJ013539 | ankyrin repeat and SOCS box protein 10                     |                                    | -4,747         | 0,004 | 3,455    | 1,290 | -3,681  | 2,326E-04 |
| CPIJ002103 | Putative uncharacterized protein                           |                                    | -4,565         | 0,000 | 848,780  | 0,667 | -6,844  | 7,681E-12 |
| CPIJ002989 | Oseg1                                                      |                                    | -4,431         | 0,007 | 5,564    | 1,274 | -3,478  | 5,053E-04 |
| CPIJ006124 | prolylcarboxypeptidase, putative                           |                                    | -4,419         | 0,000 | 148,476  | 0,685 | -6,448  | 1,132E-10 |
| CPIJ008807 | ficolin-1 precursor                                        |                                    | -4,291         | 0,012 | 2,452    | 1,301 | -3,299  | 9,709E-04 |
| CPIJ015947 | purine nucleoside phosphorylase                            |                                    | -4,288         | 0,012 | 2,516    | 1,300 | -3,298  | 9,735E-04 |
| CPIJ012061 | hyp37.3 putative secreted salivary gland protein           |                                    | -4,245         | 0,000 | 18,738   | 0,855 | -4,963  | 6,952E-07 |
| CPIJ017634 | Disulfide oxidoreductase                                   |                                    | -4,158         | 0,013 | 4,633    | 1,280 | -3,249  | 1,160E-03 |
| CPIJ007736 | Steroid dehydrogenase                                      |                                    | -4,151         | 0,000 | 12,782   | 0,927 | -4,478  | 7,537E-06 |
| CPIJ019567 | vegetatible incompatibility protein HET-E-1, putative      |                                    | -4,067         | 0,005 | 8,166    | 1,125 | -3,614  | 3,012E-04 |
| CPIJ012699 | Putative uncharacterized protein                           | CHK kinase-like domain-containing  | -3,905         | 0,007 | 7,368    | 1,121 | -3,484  | 4,934E-04 |
| CPIJ012066 | sodium/chloride dependent amino acid transporter, putative |                                    | -3,853         | 0,000 | 438,976  | 0,694 | -5,554  | 2,799E-08 |
| CPIJ012180 | Putative uncharacterized protein                           | MD-2-related lipid-recognition dom | -3,837         | 0,000 | 920,730  | 0,311 | -12,332 | 6,083E-35 |
| CPIJ007385 | serine-type enodpeptidase, putative                        |                                    | -3,764         | 0,000 | 56,310   | 0,500 | -7,520  | 5,458E-14 |
| CPIJ003858 | Pigeon protein                                             |                                    | -3,757         | 0,031 | 3,572    | 1,287 | -2,919  | 3,509E-03 |

|                                                                         |                                    |        |       |         |       |        |           |
|-------------------------------------------------------------------------|------------------------------------|--------|-------|---------|-------|--------|-----------|
| CPIJ018694 Ion channel nompC                                            |                                    | -3,695 | 0,001 | 36,389  | 0,913 | -4,046 | 5,210E-05 |
| CPIJ015475 Thiamin pyrophosphokinase 1                                  |                                    | -3,664 | 0,038 | 3,521   | 1,295 | -2,829 | 4,664E-03 |
| CPIJ009793 Glioma tumor suppressor candidate region gene 2 protein      |                                    | -3,562 | 0,001 | 11,317  | 0,861 | -4,139 | 3,494E-05 |
| CPIJ008664 Putative uncharacterized protein                             | Protein TsetseEP domain-containing | -3,478 | 0,000 | 92,332  | 0,797 | -4,365 | 1,270E-05 |
| CPIJ012888 rRNA processing protein Ebp2                                 |                                    | -3,446 | 0,030 | 5,095   | 1,173 | -2,936 | 3,321E-03 |
| CPIJ019447 bestrophin 2,3,4                                             |                                    | -3,406 | 0,058 | 2,968   | 1,299 | -2,623 | 8,717E-03 |
| CPIJ000540 Putative uncharacterized protein                             | Neuroguidin                        | -3,382 | 0,006 | 7,640   | 0,955 | -3,541 | 3,989E-04 |
| CPIJ003753 Methionyl-tRNA formyltransferase                             |                                    | -3,380 | 0,060 | 2,735   | 1,299 | -2,602 | 9,258E-03 |
| CPIJ011728 Serine/threonine protein kinase                              |                                    | -3,370 | 0,028 | 4,955   | 1,141 | -2,952 | 3,157E-03 |
| CPIJ007384 azurocidin precursor                                         |                                    | -3,364 | 0,001 | 719,258 | 0,840 | -4,003 | 6,250E-05 |
| CPIJ014772 techylectin-5B precursor                                     |                                    | -3,344 | 0,005 | 10,153  | 0,935 | -3,578 | 3,463E-04 |
| CPIJ018626 Glutathione-S-transferase theta, gst                         |                                    | -3,323 | 0,000 | 199,246 | 0,380 | -8,757 | 2,012E-18 |
| CPIJ008485 calponin/transgelin                                          |                                    | -3,317 | 0,032 | 4,822   | 1,143 | -2,903 | 3,694E-03 |
| CPIJ016341 alpha-esterase                                               |                                    | -3,203 | 0,000 | 15,887  | 0,679 | -4,717 | 2,392E-06 |
| CPIJ008877 prolylcarboxypeptidase, putative                             |                                    | -3,189 | 0,000 | 48,072  | 0,432 | -7,390 | 1,465E-13 |
| CPIJ004872 protein phosphatase 2C isoform beta                          |                                    | -3,086 | 0,000 | 14,704  | 0,717 | -4,301 | 1,701E-05 |
| CPIJ018326 Putative uncharacterized protein                             | MD-2-related lipid-recognition dom | -3,034 | 0,018 | 235,573 | 0,964 | -3,146 | 1,654E-03 |
| CPIJ007525 Putative uncharacterized protein                             | Gamma-interferon inducible lysosom | -3,021 | 0,000 | 21,224  | 0,596 | -5,072 | 3,946E-07 |
| CPIJ008659 metalloproteinase, putative                                  |                                    | -2,974 | 0,161 | 11,848  | 1,435 | -2,072 | 3,825E-02 |
| CPIJ015241 Alkaline phosphatase                                         |                                    | -2,869 | 0,007 | 9,129   | 0,821 | -3,494 | 4,752E-04 |
| CPIJ016853 CYP6N21P: cytochrome P450 6N21P                              |                                    | -2,847 | 0,000 | 64,517  | 0,474 | -6,003 | 1,937E-09 |
| CPIJ007940 Putative uncharacterized protein                             | E3 ubiquitin-protein ligase trim33 | -2,831 | 0,079 | 3,671   | 1,148 | -2,467 | 1,363E-02 |
| CPIJ018624 Glutathione-S-transferase theta, gst                         |                                    | -2,825 | 0,000 | 71,136  | 0,396 | -7,129 | 1,012E-12 |
| CPIJ009980 Eukaryotic translation initiation factor 4 gamma             |                                    | -2,814 | 0,056 | 19,218  | 1,067 | -2,639 | 8,327E-03 |
| CPIJ004709 Bifunctional protein foldD                                   |                                    | -2,783 | 0,000 | 44,070  | 0,488 | -5,701 | 1,194E-08 |
| CPIJ003579 Putative uncharacterized protein                             | DUF4536 domain-containing protei   | -2,767 | 0,037 | 5,288   | 0,977 | -2,833 | 4,615E-03 |
| CPIJ010271 Putative uncharacterized protein                             | C2H2-type domain-containing prote  | -2,760 | 0,012 | 8,373   | 0,837 | -3,297 | 9,782E-04 |
| CPIJ014142 nucleotide-binding protein 1                                 |                                    | -2,749 | 0,000 | 17,291  | 0,619 | -4,438 | 9,089E-06 |
| CPIJ003007 elongase, putative                                           |                                    | -2,739 | 0,000 | 15,860  | 0,624 | -4,391 | 1,127E-05 |
| CPIJ000909 Putative uncharacterized protein                             | F-box domain-containing protein    | -2,736 | 0,008 | 9,026   | 0,801 | -3,415 | 6,388E-04 |
| CPIJ014557 Nitrilase and fragile histidine triad fusion protein NitFhit |                                    | -2,721 | 0,002 | 12,182  | 0,695 | -3,914 | 9,076E-05 |
| CPIJ016849 CYP6M12: cytochrome P450 6M12                                |                                    | -2,689 | 0,000 | 71,441  | 0,413 | -6,514 | 7,318E-11 |
| CPIJ011602 NADH-cytochrome b5 reductase                                 |                                    | -2,676 | 0,011 | 8,197   | 0,802 | -3,337 | 8,472E-04 |
| CPIJ006909 Putative uncharacterized protein                             | FHA domain-containing protein      | -2,671 | 0,111 | 3,408   | 1,168 | -2,286 | 2,224E-02 |
| CPIJ013880 Heat shock protein 67B2                                      |                                    | -2,645 | 0,003 | 89,506  | 0,705 | -3,754 | 1,744E-04 |
| CPIJ019704 CYP6N24: cytochrome P450 6N24                                |                                    | -2,634 | 0,050 | 4,947   | 0,978 | -2,693 | 7,091E-03 |
| CPIJ007346 TTC27 protein                                                |                                    | -2,630 | 0,051 | 4,701   | 0,980 | -2,682 | 7,310E-03 |
| CPIJ016731 Putative uncharacterized protein                             | Macro domain-containing protein    | -2,590 | 0,120 | 3,180   | 1,154 | -2,244 | 2,480E-02 |

|                                                                          |                                   |        |       |         |       |        |           |
|--------------------------------------------------------------------------|-----------------------------------|--------|-------|---------|-------|--------|-----------|
| CPIJ012829 Fibrinogen and fibronectin                                    |                                   | -2,572 | 0,000 | 97,643  | 0,323 | -7,961 | 1,710E-15 |
| CPIJ004285 neural/ectodermal development factor IMP-L2 precursor         |                                   | -2,513 | 0,066 | 4,903   | 0,982 | -2,558 | 1,053E-02 |
| CPIJ007831 Putative uncharacterized protein                              | RING-type domain-containing prote | -2,511 | 0,138 | 3,066   | 1,158 | -2,169 | 3,012E-02 |
| CPIJ008422 Serine esterase                                               |                                   | -2,500 | 0,000 | 74,158  | 0,365 | -6,842 | 7,823E-12 |
| CPIJ017699 arginyl-tRNA-protein transferase 1                            |                                   | -2,482 | 0,143 | 3,072   | 1,154 | -2,151 | 3,151E-02 |
| CPIJ015882 Putative uncharacterized protein                              | RRM domain-containing protein     | -2,477 | 0,000 | 36,107  | 0,504 | -4,916 | 8,817E-07 |
| CPIJ005656 Oxidoreductase                                                |                                   | -2,472 | 0,000 | 18,195  | 0,565 | -4,376 | 1,207E-05 |
| CPIJ005214 Ceramide glucosyltransferase                                  |                                   | -2,452 | 0,000 | 18,824  | 0,553 | -4,433 | 9,315E-06 |
| CPIJ003456 Uricase                                                       |                                   | -2,447 | 0,002 | 14,917  | 0,643 | -3,808 | 1,401E-04 |
| CPIJ001035 Putative uncharacterized protein                              | Lipase domain-containing protein  | -2,444 | 0,000 | 252,134 | 0,358 | -6,823 | 8,893E-12 |
| CPIJ015623 Predicted protein                                             |                                   | -2,423 | 0,014 | 8,491   | 0,750 | -3,230 | 1,236E-03 |
| CPIJ007080 trypsin-1 precursor                                           |                                   | -2,391 | 0,005 | 14,538  | 0,661 | -3,618 | 2,969E-04 |
| CPIJ002336 Putative uncharacterized protein                              | Acetyl-coa transporter            | -2,372 | 0,001 | 19,241  | 0,588 | -4,036 | 5,427E-05 |
| CPIJ012841 Valacyclovir hydrolase                                        |                                   | -2,372 | 0,170 | 2,830   | 1,166 | -2,035 | 4,190E-02 |
| CPIJ009939 Putative uncharacterized protein                              |                                   | -2,360 | 0,016 | 8,226   | 0,743 | -3,177 | 1,489E-03 |
| CPIJ001394 Williams Beuren syndrome chromosome region 22                 |                                   | -2,359 | 0,018 | 8,148   | 0,750 | -3,145 | 1,662E-03 |
| CPIJ002679 Glutathione S-transferase theta-2                             |                                   | -2,329 | 0,338 | 115,278 | 1,526 | -1,526 | 1,270E-01 |
| CPIJ018565 Peptide methionine sulfoxide reductase                        |                                   | -2,316 | 0,006 | 12,254  | 0,660 | -3,512 | 4,451E-04 |
| CPIJ005818 13 kDa ribonucleoprotein-associated protein                   |                                   | -2,314 | 0,000 | 26,139  | 0,538 | -4,302 | 1,693E-05 |
| CPIJ008588 mRNA turnover protein 4                                       |                                   | -2,306 | 0,000 | 20,313  | 0,537 | -4,295 | 1,747E-05 |
| CPIJ001371 serine/threonine-protein phosphatase 4 catalytic subunit      |                                   | -2,304 | 0,026 | 7,803   | 0,768 | -3,000 | 2,698E-03 |
| CPIJ010601 N-terminal acetyltransferase A complex catalytic subunit ARD1 |                                   | -2,302 | 0,042 | 6,657   | 0,828 | -2,782 | 5,402E-03 |
| CPIJ013923 glucosyl/glucuronosyl transferases                            |                                   | -2,293 | 0,036 | 6,820   | 0,804 | -2,853 | 4,329E-03 |
| CPIJ006965 Putative uncharacterized protein                              | Protein takeout                   | -2,292 | 0,060 | 5,279   | 0,879 | -2,606 | 9,170E-03 |
| CPIJ003123 DNA-directed RNA polymerase I 40 kDa polypeptide              |                                   | -2,284 | 0,037 | 6,786   | 0,806 | -2,833 | 4,610E-03 |
| CPIJ000580 Ladybird homeobox corepressor                                 |                                   | -2,280 | 0,193 | 2,821   | 1,171 | -1,948 | 5,147E-02 |
| CPIJ005158 Putative uncharacterized protein                              | Vesicle transport protein SEC20   | -2,268 | 0,108 | 3,974   | 0,985 | -2,302 | 2,135E-02 |
| CPIJ017623 Tetratricopeptide repeat protein 1                            |                                   | -2,265 | 0,108 | 3,893   | 0,984 | -2,301 | 2,137E-02 |
| CPIJ019838 Mitochondrial oxodicarboxylate carrier                        |                                   | -2,264 | 0,106 | 4,016   | 0,980 | -2,309 | 2,095E-02 |
| CPIJ003710 Putative uncharacterized protein                              | WKF domain-containing protein     | -2,247 | 0,042 | 6,545   | 0,808 | -2,780 | 5,429E-03 |
| CPIJ002590 Amsh                                                          |                                   | -2,236 | 0,027 | 7,630   | 0,753 | -2,969 | 2,983E-03 |
| CPIJ006542 Chymotrypsin-2                                                |                                   | -2,215 | 0,004 | 13,787  | 0,609 | -3,636 | 2,772E-04 |
| CPIJ016639 acetyl-coa synthetase                                         |                                   | -2,186 | 0,000 | 47,386  | 0,413 | -5,293 | 1,204E-07 |
| CPIJ011433 Brachyurin                                                    |                                   | -2,186 | 0,056 | 76,934  | 0,829 | -2,637 | 8,364E-03 |
| CPIJ008889 60 kDa heat shock protein, mitochondrial precursor            |                                   | -2,174 | 0,103 | 31,600  | 0,934 | -2,328 | 1,993E-02 |
| CPIJ003580 cle7, putative                                                |                                   | -2,157 | 0,050 | 6,287   | 0,801 | -2,691 | 7,125E-03 |
| CPIJ016855 CYP6N20: cytochrome P450 6N20                                 |                                   | -2,154 | 0,000 | 135,442 | 0,280 | -7,683 | 1,558E-14 |
| CPIJ013919 Xanthine dehydrogenase/oxidase                                |                                   | -2,152 | 0,000 | 692,409 | 0,268 | -8,038 | 9,154E-16 |
| CPIJ016847 CYP6CQ1: cytochrome P450 6CQ1                                 |                                   | -2,142 | 0,230 | 2,592   | 1,177 | -1,819 | 6,890E-02 |

|                                                              |                                       |        |       |          |       |        |           |
|--------------------------------------------------------------|---------------------------------------|--------|-------|----------|-------|--------|-----------|
| CPIJ001505 Putative uncharacterized protein                  | Malectin domain-containing protein    | -2,142 | 0,007 | 13,151   | 0,620 | -3,453 | 5,549E-04 |
| CPIJ006912 Maggie                                            |                                       | -2,126 | 0,036 | 8,121    | 0,745 | -2,852 | 4,340E-03 |
| CPIJ013082 Chitinase                                         |                                       | -2,124 | 0,023 | 9,527    | 0,699 | -3,038 | 2,382E-03 |
| CPIJ012177 iodotyrosine dehalogenase 1 precursor             |                                       | -2,102 | 0,098 | 4,913    | 0,893 | -2,354 | 1,859E-02 |
| CPIJ017390 cytosolic Fe-S cluster assembling factor CFD1     |                                       | -2,099 | 0,036 | 8,167    | 0,735 | -2,856 | 4,287E-03 |
| CPIJ000536 Secreted protein                                  |                                       | -2,088 | 0,152 | 3,477    | 0,990 | -2,108 | 3,499E-02 |
| CPIJ001316 6-phosphogluconate dehydrogenase, decarboxylating |                                       | -2,082 | 0,000 | 33,091   | 0,422 | -4,929 | 8,282E-07 |
| CPIJ009452 Monocarboxylate transporter                       |                                       | -2,078 | 0,099 | 4,692    | 0,884 | -2,351 | 1,870E-02 |
| CPIJ009924 Putative uncharacterized protein                  |                                       | -2,059 | 0,039 | 8,288    | 0,730 | -2,822 | 4,773E-03 |
| CPIJ001337 Uridine 5-monophosphate synthase                  |                                       | -2,055 | 0,106 | 4,898    | 0,891 | -2,307 | 2,103E-02 |
| CPIJ009935 mannosyl-oligosaccharide alpha-1,2-mannosidase    |                                       | -2,041 | 0,039 | 8,018    | 0,724 | -2,818 | 4,832E-03 |
| CPIJ012503 gamma-glutamylcysteine synthetase, putative       |                                       | -2,018 | 0,042 | 8,092    | 0,725 | -2,784 | 5,372E-03 |
| CPIJ013917 esterase B1 precursor                             |                                       | -2,014 | 0,000 | 256,649  | 0,279 | -7,213 | 5,481E-13 |
| CPIJ019868 Heat shock 70 kDa protein 4                       |                                       | -2,007 | 0,215 | 17,558   | 1,072 | -1,872 | 6,124E-02 |
| CPIJ001974 Putative uncharacterized protein                  | Mitochondrial cytochrome c oxidase    | -2,001 | 0,064 | 6,746    | 0,778 | -2,572 | 1,010E-02 |
| CPIJ008943 Sugar transporter                                 |                                       | -1,995 | 0,143 | 4,618    | 0,928 | -2,149 | 3,161E-02 |
| CPIJ018627 Glutathione S-transferase 1-1                     |                                       | -1,994 | 0,000 | 181,067  | 0,262 | -7,603 | 2,899E-14 |
| CPIJ011962 Multidrug resistance-associated protein 14        |                                       | -1,989 | 0,012 | 13,336   | 0,604 | -3,292 | 9,945E-04 |
| CPIJ006688 kinesin heavy chain subunit                       |                                       | -1,978 | 0,004 | 18,947   | 0,542 | -3,649 | 2,633E-04 |
| CPIJ002675 Glutathione S-transferase 1                       |                                       | -1,956 | 0,000 | 1094,519 | 0,338 | -5,783 | 7,351E-09 |
| CPIJ010538 CYP9J46: cytochrome P450 9J46                     |                                       | -1,936 | 0,000 | 62,783   | 0,413 | -4,686 | 2,783E-06 |
| CPIJ019225 Calmodulin                                        |                                       | -1,936 | 0,049 | 8,407    | 0,713 | -2,714 | 6,647E-03 |
| CPIJ009657 Putative uncharacterized protein                  | Nucleolar protein 16                  | -1,932 | 0,077 | 6,667    | 0,779 | -2,479 | 1,318E-02 |
| CPIJ004369 glucosyl transferase                              |                                       | -1,930 | 0,000 | 35,373   | 0,422 | -4,570 | 4,874E-06 |
| CPIJ007774 Putative uncharacterized protein                  | VPS9 domain-containing protein        | -1,922 | 0,079 | 6,907    | 0,778 | -2,469 | 1,355E-02 |
| CPIJ016672 Putative uncharacterized protein                  | Mitochondrial import inner membra     | -1,907 | 0,114 | 5,350    | 0,839 | -2,273 | 2,305E-02 |
| CPIJ005033 Nucleolar protein NHP2                            |                                       | -1,905 | 0,005 | 16,343   | 0,531 | -3,591 | 3,295E-04 |
| CPIJ007770 DNA-directed RNA polymerase III subunit D         |                                       | -1,904 | 0,202 | 3,390    | 0,996 | -1,912 | 5,587E-02 |
| CPIJ017540 Coatomer subunit delta                            |                                       | -1,895 | 0,012 | 23,050   | 0,579 | -3,275 | 1,058E-03 |
| CPIJ011644 Ubiquitin-protein ligase                          |                                       | -1,893 | 0,063 | 7,385    | 0,735 | -2,576 | 9,997E-03 |
| CPIJ020069 Methionine aminopeptidase 2                       |                                       | -1,888 | 0,060 | 7,412    | 0,725 | -2,604 | 9,213E-03 |
| CPIJ011687 Inosine-5-monophosphate dehydrogenase             |                                       | -1,887 | 0,013 | 16,714   | 0,578 | -3,265 | 1,096E-03 |
| CPIJ015011 Putative uncharacterized protein                  |                                       | -1,880 | 0,031 | 11,688   | 0,644 | -2,918 | 3,521E-03 |
| CPIJ011381 serine-type enodpeptidase, putative               |                                       | -1,873 | 0,000 | 187,196  | 0,335 | -5,592 | 2,245E-08 |
| CPIJ015373 S-formylglutathione hydrolase                     |                                       | -1,871 | 0,001 | 23,933   | 0,468 | -3,995 | 6,467E-05 |
| CPIJ011770 Uncharacterized protein (Fragment)                |                                       | -1,869 | 0,062 | 8,756    | 0,721 | -2,591 | 9,578E-03 |
| CPIJ015645 Putative uncharacterized protein                  | non-specific serine/threonine proteit | -1,851 | 0,068 | 7,103    | 0,728 | -2,543 | 1,098E-02 |
| CPIJ015106 tonin precursor                                   |                                       | -1,845 | 0,002 | 29,419   | 0,476 | -3,877 | 1,057E-04 |
| CPIJ008116 Adenosylhomocysteinase                            |                                       | -1,842 | 0,368 | 30,815   | 1,268 | -1,453 | 1,462E-01 |



|                                                                     |                                     |        |       |         |       |        |           |
|---------------------------------------------------------------------|-------------------------------------|--------|-------|---------|-------|--------|-----------|
| CPIJ010515 Phosphoenolpyruvate carboxykinase                        |                                     | -1,832 | 0,237 | 3,319   | 1,018 | -1,801 | 7,174E-02 |
| CPIJ016097 Peroxisomal membrane protein 70 abcd3                    |                                     | -1,824 | 0,003 | 38,812  | 0,482 | -3,782 | 1,556E-04 |
| CPIJ005595 Fatty acid synthase S-acetyltransferase                  |                                     | -1,815 | 0,000 | 136,135 | 0,371 | -4,891 | 1,003E-06 |
| CPIJ013918 esterase B1 precursor                                    |                                     | -1,811 | 0,000 | 760,449 | 0,207 | -8,749 | 2,159E-18 |
| CPIJ014453 Putative uncharacterized protein                         | Arrestin C-terminal-like domain-cor | -1,780 | 0,086 | 6,995   | 0,733 | -2,427 | 1,524E-02 |
| CPIJ001564 Selenide                                                 |                                     | -1,775 | 0,000 | 47,760  | 0,388 | -4,578 | 4,699E-06 |
| CPIJ016846 CYP6M13: cytochrome P450 6M13                            |                                     | -1,772 | 0,421 | 85,859  | 1,329 | -1,333 | 1,825E-01 |
| CPIJ016253 transport and Golgi organization, putative               |                                     | -1,771 | 0,125 | 5,878   | 0,797 | -2,221 | 2,634E-02 |
| CPIJ011032 Putative uncharacterized protein                         | Small-subunit processome Utp12 do   | -1,756 | 0,079 | 8,708   | 0,712 | -2,465 | 1,370E-02 |
| CPIJ005830 glutaredoxin, putative                                   |                                     | -1,742 | 0,016 | 21,385  | 0,547 | -3,185 | 1,449E-03 |
| CPIJ011600 Long-chain-fatty-acid coa ligase                         |                                     | -1,742 | 0,002 | 64,809  | 0,448 | -3,888 | 1,010E-04 |
| CPIJ011457 Putative uncharacterized protein                         | DUF4149 domain-containing protei    | -1,741 | 0,001 | 34,876  | 0,420 | -4,144 | 3,419E-05 |
| CPIJ015682 Translation initiation factor if-2                       |                                     | -1,739 | 0,017 | 15,505  | 0,549 | -3,167 | 1,539E-03 |
| CPIJ016852 CYP6N19: cytochrome P450 6N19                            |                                     | -1,739 | 0,000 | 179,270 | 0,381 | -4,567 | 4,953E-06 |
| CPIJ004017 Cyclin 1                                                 |                                     | -1,737 | 0,080 | 8,374   | 0,706 | -2,459 | 1,394E-02 |
| CPIJ019233 Cerebral protein 1                                       |                                     | -1,735 | 0,084 | 8,323   | 0,712 | -2,438 | 1,477E-02 |
| CPIJ015759 chondroitin sulfate synthase 1                           |                                     | -1,734 | 0,083 | 7,814   | 0,709 | -2,444 | 1,454E-02 |
| CPIJ004081 protein Peter pan                                        |                                     | -1,733 | 0,096 | 6,690   | 0,730 | -2,373 | 1,766E-02 |
| CPIJ010146 Putative uncharacterized protein                         | VWFA domain-containing protein      | -1,733 | 0,054 | 11,216  | 0,652 | -2,658 | 7,852E-03 |
| CPIJ017319 Putative uncharacterized protein                         |                                     | -1,730 | 0,049 | 10,695  | 0,640 | -2,703 | 6,881E-03 |
| CPIJ007014 Splicing factor 3B subunit 3                             |                                     | -1,722 | 0,015 | 33,310  | 0,537 | -3,208 | 1,337E-03 |
| CPIJ001891 Putative uncharacterized protein                         | CCHC-type domain-containing prot    | -1,717 | 0,000 | 223,281 | 0,261 | -6,575 | 4,850E-11 |
| CPIJ019673 CYP6AG15: cytochrome P450 6AG15                          |                                     | -1,714 | 0,000 | 38,700  | 0,389 | -4,408 | 1,044E-05 |
| CPIJ016931 Glutamate-rich WD repeat-containing protein 1            |                                     | -1,714 | 0,000 | 35,901  | 0,399 | -4,295 | 1,747E-05 |
| CPIJ002591 Mitochondrial solute carrier                             |                                     | -1,713 | 0,025 | 13,420  | 0,569 | -3,013 | 2,587E-03 |
| CPIJ015367 Putative uncharacterized protein                         |                                     | -1,704 | 0,270 | 3,075   | 1,001 | -1,703 | 8,852E-02 |
| CPIJ011261 Cell cycle control protein cwf8                          |                                     | -1,700 | 0,097 | 6,799   | 0,719 | -2,363 | 1,813E-02 |
| CPIJ012065 tryptophan transporter                                   |                                     | -1,698 | 0,002 | 33,167  | 0,445 | -3,818 | 1,344E-04 |
| CPIJ009821 RpI12                                                    |                                     | -1,698 | 0,102 | 6,940   | 0,729 | -2,331 | 1,977E-02 |
| CPIJ006732 Gamma-tubulin complex component                          |                                     | -1,688 | 0,219 | 4,023   | 0,909 | -1,857 | 6,333E-02 |
| CPIJ015262 Heterogeneous nuclear ribonucleoprotein 27C              |                                     | -1,688 | 0,011 | 25,556  | 0,507 | -3,330 | 8,672E-04 |
| CPIJ002063 Mitochondrial ribosomal protein L42                      |                                     | -1,685 | 0,016 | 15,936  | 0,531 | -3,173 | 1,510E-03 |
| CPIJ005510 Putative uncharacterized protein                         | rRNA-processing protein UTP23       | -1,674 | 0,222 | 3,858   | 0,906 | -1,847 | 6,474E-02 |
| CPIJ009240 Ganglioside-induced differentiation-associated protein 1 |                                     | -1,672 | 0,005 | 21,254  | 0,465 | -3,593 | 3,268E-04 |
| CPIJ012125 FK506 binding protein                                    |                                     | -1,672 | 0,280 | 2,969   | 1,000 | -1,672 | 9,445E-02 |
| CPIJ005348 lipase 3 precursor                                       |                                     | -1,670 | 0,050 | 10,589  | 0,618 | -2,702 | 6,903E-03 |
| CPIJ001915 WD repeat domain 50                                      |                                     | -1,662 | 0,078 | 8,429   | 0,672 | -2,473 | 1,339E-02 |
| CPIJ005505 Putative uncharacterized protein                         |                                     | -1,660 | 0,005 | 26,419  | 0,461 | -3,602 | 3,153E-04 |
| CPIJ008595 ran                                                      |                                     | -1,659 | 0,022 | 22,095  | 0,542 | -3,063 | 2,189E-03 |

|            |                                                            |        |       |          |       |        |           |
|------------|------------------------------------------------------------|--------|-------|----------|-------|--------|-----------|
| CPIJ010842 | Transmembrane trafficking protein                          | -1,657 | 0,044 | 15,281   | 0,602 | -2,754 | 5,879E-03 |
| CPIJ008647 | Atlastin                                                   | -1,652 | 0,027 | 15,483   | 0,555 | -2,974 | 2,937E-03 |
| CPIJ000418 | Putative uncharacterized protein                           | -1,651 | 0,151 | 5,811    | 0,781 | -2,114 | 3,451E-02 |
| CPIJ000710 | Putative uncharacterized protein                           | -1,649 | 0,090 | 8,340    | 0,685 | -2,406 | 1,612E-02 |
| CPIJ001862 | Sodium/solute symporter                                    | -1,648 | 0,125 | 6,825    | 0,742 | -2,221 | 2,634E-02 |
| CPIJ006182 | Zinc finger protein                                        | -1,648 | 0,229 | 3,970    | 0,903 | -1,824 | 6,809E-02 |
| CPIJ016145 | Predicted protein                                          | -1,646 | 0,094 | 8,722    | 0,691 | -2,382 | 1,722E-02 |
| CPIJ009725 | Putative uncharacterized protein                           | -1,638 | 0,124 | 6,713    | 0,735 | -2,227 | 2,594E-02 |
| CPIJ008477 | Acyl-CoA-binding domain-containing protein 6               | -1,635 | 0,090 | 10,686   | 0,680 | -2,406 | 1,612E-02 |
| CPIJ000795 | H/ACA ribonucleoprotein complex subunit 4                  | -1,634 | 0,000 | 82,017   | 0,325 | -5,036 | 4,755E-07 |
| CPIJ000770 | trypsin precursor                                          | -1,632 | 0,050 | 1822,467 | 0,606 | -2,693 | 7,072E-03 |
| CPIJ012747 | uridine cytidine kinase i                                  | -1,632 | 0,077 | 9,031    | 0,658 | -2,480 | 1,314E-02 |
| CPIJ014193 | Putative uncharacterized protein                           | -1,631 | 0,000 | 173,914  | 0,323 | -5,050 | 4,416E-07 |
| CPIJ014398 | Host cell factor                                           | -1,624 | 0,162 | 5,433    | 0,785 | -2,069 | 3,850E-02 |
| CPIJ005438 | exocyst complex component 6                                | -1,623 | 0,017 | 20,057   | 0,513 | -3,163 | 1,561E-03 |
| CPIJ005168 | dolichyl-diphosphooligosaccharide protein glycotransferase | -1,618 | 0,023 | 29,980   | 0,530 | -3,051 | 2,277E-03 |
| CPIJ001361 | proteasome subunit beta type 3                             | -1,615 | 0,012 | 20,635   | 0,490 | -3,295 | 9,837E-04 |
| CPIJ019364 | apolipoprotein D, putative                                 | -1,610 | 0,058 | 11,515   | 0,613 | -2,626 | 8,637E-03 |
| CPIJ010392 | PET191 polypeptide, putative                               | -1,610 | 0,071 | 9,908    | 0,639 | -2,521 | 1,171E-02 |
| CPIJ000668 | Putative uncharacterized protein                           | -1,610 | 0,245 | 3,735    | 0,904 | -1,780 | 7,510E-02 |
| CPIJ007556 | Regulator of ribosome biosynthesis                         | -1,606 | 0,012 | 20,247   | 0,487 | -3,300 | 9,661E-04 |
| CPIJ010629 | Membrane associated progesterone receptor                  | -1,603 | 0,002 | 27,270   | 0,417 | -3,846 | 1,200E-04 |
| CPIJ009620 | Serine/threonine-protein phosphatase 5                     | -1,603 | 0,007 | 24,309   | 0,463 | -3,460 | 5,393E-04 |
| CPIJ017671 | Ubiquitin thioesterase OTU1                                | -1,603 | 0,019 | 17,286   | 0,514 | -3,119 | 1,814E-03 |
| CPIJ020078 | Putative uncharacterized protein                           | -1,599 | 0,183 | 5,625    | 0,806 | -1,984 | 4,720E-02 |
| CPIJ005674 | Cold shock domain-containing protein E1                    | -1,599 | 0,114 | 7,084    | 0,703 | -2,274 | 2,297E-02 |
| CPIJ009285 | Ribosome production factor 1                               | -1,598 | 0,042 | 12,587   | 0,575 | -2,780 | 5,440E-03 |
| CPIJ001085 | Low molecular weight protein-tyrosine-phosphatase          | -1,593 | 0,315 | 2,878    | 1,007 | -1,581 | 1,140E-01 |
| CPIJ001476 | Shwachman-Bodian-Diamond syndrome protein                  | -1,579 | 0,109 | 7,946    | 0,687 | -2,297 | 2,160E-02 |
| CPIJ008729 | 4-aminobutyrate aminotransferase, mitochondrial precursor  | -1,572 | 0,027 | 14,456   | 0,530 | -2,968 | 2,997E-03 |
| CPIJ018255 | Mitochondrial 28S ribosomal protein S33                    | -1,569 | 0,096 | 8,726    | 0,662 | -2,368 | 1,788E-02 |
| CPIJ010003 | T-complex protein 1 subunit gamma                          | -1,567 | 0,098 | 7,996    | 0,665 | -2,358 | 1,838E-02 |
| CPIJ013588 | Mitochondrial 28S ribosomal protein S2                     | -1,564 | 0,049 | 12,496   | 0,578 | -2,707 | 6,795E-03 |
| CPIJ005488 | Putative uncharacterized protein                           | -1,562 | 0,138 | 6,881    | 0,720 | -2,168 | 3,017E-02 |
| CPIJ019817 | Cytochrome c oxidase assembly protein COX19                | -1,561 | 0,043 | 13,131   | 0,564 | -2,767 | 5,656E-03 |
| CPIJ013899 | 40S ribosomal protein SA                                   | -1,558 | 0,215 | 123,026  | 0,833 | -1,869 | 6,158E-02 |
| CPIJ010586 | Transcription elongation factor SPT4                       | -1,553 | 0,175 | 5,322    | 0,771 | -2,014 | 4,398E-02 |
| CPIJ007179 | Prosalpha4: 26S proteasome alpha 4 subunit                 | -1,552 | 0,004 | 32,521   | 0,420 | -3,697 | 2,184E-04 |

|            |                                                                   |                                     |        |       |         |       |        |           |
|------------|-------------------------------------------------------------------|-------------------------------------|--------|-------|---------|-------|--------|-----------|
| CPIJ010029 | Suppressor of profilin 2                                          |                                     | -1,550 | 0,002 | 59,859  | 0,399 | -3,884 | 1,028E-04 |
| CPIJ015054 | Putative uncharacterized protein                                  | Anaphase-promoting complex subur    | -1,550 | 0,133 | 6,951   | 0,707 | -2,191 | 2,842E-02 |
| CPIJ003661 | alpha-1,2-Mannosidase                                             |                                     | -1,544 | 0,047 | 12,401  | 0,566 | -2,728 | 6,377E-03 |
| CPIJ020199 | CYP6N20: cytochrome P450 6N20                                     |                                     | -1,544 | 0,002 | 34,559  | 0,401 | -3,847 | 1,197E-04 |
| CPIJ006617 | Putative uncharacterized protein                                  | ascorbate ferrireductase (transmemb | -1,542 | 0,001 | 146,903 | 0,362 | -4,256 | 2,086E-05 |
| CPIJ009724 | presenilin sel-12                                                 |                                     | -1,538 | 0,103 | 7,917   | 0,660 | -2,329 | 1,984E-02 |
| CPIJ015556 | RpS28: 40S ribosomal protein S28                                  |                                     | -1,532 | 0,267 | 47,552  | 0,894 | -1,713 | 8,663E-02 |
| CPIJ005845 | Uncharacterized protein (Fragment)                                |                                     | -1,529 | 0,350 | 2,685   | 1,022 | -1,495 | 1,348E-01 |
| CPIJ004400 | ornithine aminotransferase, mitochondrial precursor               |                                     | -1,525 | 0,008 | 59,251  | 0,443 | -3,447 | 5,672E-04 |
| CPIJ014454 | L-lactate dehydrogenase                                           |                                     | -1,524 | 0,080 | 9,969   | 0,619 | -2,460 | 1,388E-02 |
| CPIJ000670 | 24-dehydrocholesterol reductase precursor                         |                                     | -1,522 | 0,000 | 514,623 | 0,237 | -6,423 | 1,339E-10 |
| CPIJ007035 | SalLip1: salivary lipase                                          |                                     | -1,519 | 0,541 | 14,379  | 1,426 | -1,066 | 2,866E-01 |
| CPIJ016453 | Acyl-coa dehydrogenase                                            |                                     | -1,519 | 0,014 | 24,767  | 0,471 | -3,224 | 1,262E-03 |
| CPIJ003159 | Ribosomal protein P0                                              |                                     | -1,512 | 0,058 | 19,493  | 0,577 | -2,620 | 8,782E-03 |
| CPIJ006724 | tubulin alpha-1 chain                                             |                                     | -1,511 | 0,000 | 418,276 | 0,238 | -6,351 | 2,139E-10 |
| CPIJ007327 | protein disulfide-isomerase A6 precursor                          |                                     | -1,510 | 0,000 | 202,881 | 0,349 | -4,325 | 1,524E-05 |
| CPIJ001314 | WD repeat protein 46                                              |                                     | -1,508 | 0,062 | 13,189  | 0,583 | -2,585 | 9,729E-03 |
| CPIJ019912 | Tumor suppressor candidate 4                                      |                                     | -1,505 | 0,173 | 5,871   | 0,745 | -2,022 | 4,322E-02 |
| CPIJ007196 | Putative uncharacterized protein                                  | Hypoxia up-regulated protein 1      | -1,505 | 0,001 | 129,796 | 0,362 | -4,155 | 3,251E-05 |
| CPIJ007404 | Guanine nucleotide-binding protein subunit beta 1                 |                                     | -1,505 | 0,027 | 16,243  | 0,507 | -2,969 | 2,991E-03 |
| CPIJ002678 | Glutathione transferase I                                         |                                     | -1,505 | 0,022 | 26,763  | 0,492 | -3,059 | 2,224E-03 |
| CPIJ016781 | Putative uncharacterized protein                                  | H/ACA ribonucleoprotein complex :   | -1,496 | 0,193 | 6,413   | 0,767 | -1,951 | 5,109E-02 |
| CPIJ005170 | GTP-binding protein                                               |                                     | -1,491 | 0,072 | 11,350  | 0,593 | -2,514 | 1,192E-02 |
| CPIJ007177 | nucleoporin, Nup153, putative                                     |                                     | -1,488 | 0,109 | 10,008  | 0,648 | -2,297 | 2,165E-02 |
| CPIJ012068 | Sucrose transport protein                                         |                                     | -1,488 | 0,000 | 166,346 | 0,310 | -4,797 | 1,609E-06 |
| CPIJ018377 | T-complex protein 1 subunit epsilon                               |                                     | -1,487 | 0,000 | 97,520  | 0,316 | -4,706 | 2,522E-06 |
| CPIJ009280 | Pgk: Phosphoglycerate kinase                                      |                                     | -1,486 | 0,001 | 60,445  | 0,369 | -4,030 | 5,574E-05 |
| CPIJ003558 | Deoxyhypusine hydroxylase                                         |                                     | -1,486 | 0,096 | 11,848  | 0,628 | -2,367 | 1,793E-02 |
| CPIJ010611 | Dual specificity mitogen-activated protein kinase kinase 4 MAPKK4 |                                     | -1,483 | 0,135 | 8,247   | 0,680 | -2,182 | 2,908E-02 |
| CPIJ012519 | E3 ubiquitin-protein ligase RNF123                                |                                     | -1,479 | 0,221 | 5,424   | 0,799 | -1,852 | 6,399E-02 |
| CPIJ019318 | Putative uncharacterized protein                                  | N-acetyltransferase domain-containi | -1,478 | 0,163 | 6,639   | 0,716 | -2,065 | 3,891E-02 |
| CPIJ006359 | Putative uncharacterized protein                                  |                                     | -1,477 | 0,010 | 22,438  | 0,441 | -3,350 | 8,068E-04 |
| CPIJ006932 | Ebna2 binding protein P100                                        |                                     | -1,477 | 0,005 | 100,439 | 0,411 | -3,594 | 3,252E-04 |
| CPIJ009142 | coagulation factor VII precursor                                  |                                     | -1,471 | 0,250 | 4,412   | 0,835 | -1,761 | 7,818E-02 |
| CPIJ003399 | Peroxiredoxins, prx-1, prx-2, prx-3                               |                                     | -1,467 | 0,004 | 41,522  | 0,397 | -3,693 | 2,217E-04 |
| CPIJ015771 | Kinesin light chain 1 and                                         |                                     | -1,467 | 0,063 | 14,768  | 0,568 | -2,581 | 9,848E-03 |
| CPIJ017118 | Putative uncharacterized protein                                  | CHK kinase-like domain-containing   | -1,463 | 0,072 | 15,286  | 0,581 | -2,519 | 1,176E-02 |
| CPIJ004362 | Lethal 87Df                                                       |                                     | -1,462 | 0,160 | 7,296   | 0,703 | -2,080 | 3,750E-02 |

|                                                                 |                                   |        |       |         |       |        |           |
|-----------------------------------------------------------------|-----------------------------------|--------|-------|---------|-------|--------|-----------|
| CPIJ005675 NBP2b protein, putative                              |                                   | -1,462 | 0,254 | 4,419   | 0,836 | -1,749 | 8,031E-02 |
| CPIJ000199 Putative uncharacterized protein                     |                                   | -1,461 | 0,259 | 4,218   | 0,843 | -1,733 | 8,316E-02 |
| CPIJ001395 Translocase of outer membrane 34                     |                                   | -1,456 | 0,105 | 11,564  | 0,629 | -2,314 | 2,068E-02 |
| CPIJ012815 Mannose-1-phosphate guanyltransferase                |                                   | -1,451 | 0,039 | 23,534  | 0,516 | -2,813 | 4,910E-03 |
| CPIJ013872 Putative uncharacterized protein                     |                                   | -1,450 | 0,206 | 5,796   | 0,763 | -1,899 | 5,751E-02 |
| CPIJ014050 Predicted protein                                    |                                   | -1,449 | 0,002 | 36,359  | 0,377 | -3,838 | 1,242E-04 |
| CPIJ011444 Putative uncharacterized protein                     | tRNA (adenine(58)-N(1))-methyltra | -1,445 | 0,162 | 6,887   | 0,698 | -2,069 | 3,853E-02 |
| CPIJ010410 tRNA-dihydrouridine synthase                         |                                   | -1,443 | 0,161 | 7,297   | 0,697 | -2,071 | 3,836E-02 |
| CPIJ009388 Thermosome subunit alpha                             |                                   | -1,443 | 0,000 | 53,636  | 0,335 | -4,312 | 1,616E-05 |
| CPIJ000616 clip-domain serine protease, putative                |                                   | -1,442 | 0,191 | 6,061   | 0,737 | -1,957 | 5,037E-02 |
| CPIJ001688 39S ribosomal protein L43, mitochondrial precursor   |                                   | -1,441 | 0,161 | 8,169   | 0,695 | -2,073 | 3,821E-02 |
| CPIJ016037 Pre-mRNA-splicing factor ISY1                        |                                   | -1,439 | 0,267 | 4,190   | 0,840 | -1,713 | 8,663E-02 |
| CPIJ001706 small nuclear ribonucleoprotein sm d2                |                                   | -1,439 | 0,024 | 18,548  | 0,476 | -3,020 | 2,526E-03 |
| CPIJ015389 Proliferation-associated 2g4                         |                                   | -1,437 | 0,001 | 60,291  | 0,357 | -4,025 | 5,703E-05 |
| CPIJ008642 disp: protein dispatched (segment polarity protein)  |                                   | -1,433 | 0,259 | 4,198   | 0,827 | -1,733 | 8,301E-02 |
| CPIJ006520 Putative uncharacterized protein                     | TM2 domain-containing protein     | -1,424 | 0,246 | 5,022   | 0,802 | -1,775 | 7,589E-02 |
| CPIJ011645 Hyperplastic discs protein                           |                                   | -1,422 | 0,062 | 19,516  | 0,550 | -2,587 | 9,675E-03 |
| CPIJ002726 lipase 3 precursor                                   |                                   | -1,420 | 0,117 | 10,058  | 0,628 | -2,261 | 2,377E-02 |
| CPIJ003799 protein suppressor of forked                         |                                   | -1,419 | 0,089 | 10,930  | 0,589 | -2,410 | 1,596E-02 |
| CPIJ008450 Peroxiredoxin-6                                      |                                   | -1,418 | 0,003 | 58,600  | 0,376 | -3,769 | 1,641E-04 |
| CPIJ007895 mitochondrial dimethyladenosine transferase 1        |                                   | -1,416 | 0,111 | 14,666  | 0,620 | -2,286 | 2,227E-02 |
| CPIJ007223 Metaxin                                              |                                   | -1,415 | 0,189 | 7,285   | 0,720 | -1,965 | 4,936E-02 |
| CPIJ017386 proteasome subunit beta type 8 precursor             |                                   | -1,413 | 0,035 | 26,086  | 0,494 | -2,860 | 4,242E-03 |
| CPIJ007228 heat shock protein, putative                         |                                   | -1,406 | 0,001 | 75,504  | 0,334 | -4,212 | 2,536E-05 |
| CPIJ019503 DNA cross-link repair 1A protein                     |                                   | -1,402 | 0,231 | 5,006   | 0,771 | -1,818 | 6,909E-02 |
| CPIJ002858 Putative uncharacterized protein                     | GRAM domain-containing protein    | -1,402 | 0,000 | 135,472 | 0,306 | -4,587 | 4,489E-06 |
| CPIJ008204 Microtubule associated protein xmap215               |                                   | -1,399 | 0,257 | 4,735   | 0,805 | -1,738 | 8,218E-02 |
| CPIJ006139 mitochondrial ribosomal protein, L53, putative       |                                   | -1,399 | 0,128 | 9,199   | 0,633 | -2,211 | 2,704E-02 |
| CPIJ005330 60S ribosome subunit biogenesis protein NIP7 homolog |                                   | -1,399 | 0,054 | 14,026  | 0,526 | -2,661 | 7,797E-03 |
| CPIJ014522 lava lamp protein                                    |                                   | -1,397 | 0,000 | 76,406  | 0,324 | -4,312 | 1,619E-05 |
| CPIJ006361 Equilibrative nucleoside transporter                 |                                   | -1,396 | 0,037 | 23,921  | 0,491 | -2,843 | 4,471E-03 |
| CPIJ016450 Leucine carboxyl methyltransferase                   |                                   | -1,393 | 0,287 | 4,002   | 0,843 | -1,653 | 9,832E-02 |
| CPIJ002176 Phosphatidylserine synthase                          |                                   | -1,393 | 0,038 | 22,402  | 0,493 | -2,828 | 4,679E-03 |
| CPIJ010145 Midasin                                              |                                   | -1,390 | 0,028 | 26,669  | 0,470 | -2,955 | 3,126E-03 |
| CPIJ010674 Proliferating-cell nucleolar antigen p120            |                                   | -1,388 | 0,007 | 32,866  | 0,402 | -3,454 | 5,526E-04 |
| CPIJ005010 Fibrillarin                                          |                                   | -1,386 | 0,001 | 123,008 | 0,340 | -4,074 | 4,614E-05 |
| CPIJ008264 proteasome subunit beta type 7 precursor             |                                   | -1,384 | 0,018 | 29,445  | 0,440 | -3,143 | 1,675E-03 |
| CPIJ005257 transmembrane protein 85                             |                                   | -1,375 | 0,017 | 22,778  | 0,436 | -3,156 | 1,599E-03 |
| CPIJ008623 Flotillin-1                                          |                                   | -1,375 | 0,042 | 20,101  | 0,495 | -2,775 | 5,515E-03 |

|            |                                                           |                                     |        |       |          |       |        |           |
|------------|-----------------------------------------------------------|-------------------------------------|--------|-------|----------|-------|--------|-----------|
| CPIJ017039 | cd36 antigen, putative                                    |                                     | -1,374 | 0,002 | 51,500   | 0,356 | -3,859 | 1,138E-04 |
| CPIJ002676 | Glutathione S-transferase D7                              |                                     | -1,374 | 0,000 | 60,553   | 0,322 | -4,268 | 1,970E-05 |
| CPIJ001404 | Voltage-gated ion channel                                 |                                     | -1,370 | 0,241 | 5,745    | 0,766 | -1,790 | 7,352E-02 |
| CPIJ004062 | Putative uncharacterized protein                          | Protein UXT                         | -1,370 | 0,294 | 3,994    | 0,837 | -1,637 | 1,016E-01 |
| CPIJ005468 | Adenosine diphosphatase                                   |                                     | -1,368 | 0,003 | 36,763   | 0,369 | -3,710 | 2,075E-04 |
| CPIJ004373 | UDP-glucuronosyltransferase                               |                                     | -1,365 | 0,029 | 23,495   | 0,463 | -2,947 | 3,206E-03 |
| CPIJ018234 | translocon-associated protein subunit alpha precursor     |                                     | -1,364 | 0,002 | 106,294  | 0,354 | -3,849 | 1,185E-04 |
| CPIJ015408 | branched-chain amino acid aminotransferase                |                                     | -1,360 | 0,001 | 90,419   | 0,327 | -4,158 | 3,217E-05 |
| CPIJ011806 | Superoxide dismutase, Mn                                  |                                     | -1,360 | 0,210 | 6,253    | 0,721 | -1,888 | 5,909E-02 |
| CPIJ001666 | protein catecholamines up                                 |                                     | -1,358 | 0,063 | 13,796   | 0,527 | -2,578 | 9,932E-03 |
| CPIJ017966 | Putative uncharacterized protein                          | Stambha A                           | -1,356 | 0,005 | 38,058   | 0,380 | -3,569 | 3,589E-04 |
| CPIJ005588 | Small nuclear ribonucleoprotein SM D3                     |                                     | -1,351 | 0,085 | 12,053   | 0,556 | -2,431 | 1,505E-02 |
| CPIJ011526 | Elongation factor 2                                       |                                     | -1,348 | 0,160 | 9,276    | 0,648 | -2,079 | 3,760E-02 |
| CPIJ016848 | CYP6M14: cytochrome P450 6M14                             |                                     | -1,347 | 0,000 | 829,065  | 0,300 | -4,488 | 7,181E-06 |
| CPIJ019550 | Predicted protein                                         |                                     | -1,346 | 0,049 | 18,890   | 0,497 | -2,709 | 6,745E-03 |
| CPIJ002909 | Far upstream binding protein                              |                                     | -1,346 | 0,027 | 29,522   | 0,453 | -2,968 | 2,993E-03 |
| CPIJ010503 | Ankyrin 2,3/unc44                                         |                                     | -1,345 | 0,075 | 16,684   | 0,538 | -2,497 | 1,253E-02 |
| CPIJ007524 | Putative uncharacterized protein                          | Gamma-interferon inducible lysosor  | -1,343 | 0,007 | 143,450  | 0,384 | -3,498 | 4,696E-04 |
| CPIJ008352 | Putative uncharacterized protein                          | N-acetyltransferase domain-containi | -1,343 | 0,049 | 16,027   | 0,495 | -2,715 | 6,629E-03 |
| CPIJ016922 | farnesol dehydrogenase                                    |                                     | -1,338 | 0,023 | 40,369   | 0,440 | -3,043 | 2,341E-03 |
| CPIJ002334 | Importin-4                                                |                                     | -1,337 | 0,050 | 31,545   | 0,496 | -2,693 | 7,092E-03 |
| CPIJ019789 | Putative uncharacterized protein                          |                                     | -1,336 | 0,007 | 33,823   | 0,384 | -3,479 | 5,036E-04 |
| CPIJ009811 | Mitochondrial ribosomal protein L38                       |                                     | -1,335 | 0,168 | 10,384   | 0,653 | -2,044 | 4,095E-02 |
| CPIJ009807 | Bhlhzip transcription factor bigmax                       |                                     | -1,332 | 0,115 | 12,740   | 0,587 | -2,269 | 2,327E-02 |
| CPIJ014505 | Putative uncharacterized protein                          | NADH dehydrogenase [ubiquinone]     | -1,331 | 0,193 | 7,588    | 0,683 | -1,948 | 5,136E-02 |
| CPIJ004642 | Trypsin                                                   |                                     | -1,330 | 0,062 | 14,982   | 0,513 | -2,593 | 9,507E-03 |
| CPIJ005015 | ICLn protein                                              |                                     | -1,330 | 0,311 | 3,910    | 0,835 | -1,593 | 1,112E-01 |
| CPIJ006926 | protein phosphatase 1 regulatory subunit 12b              |                                     | -1,324 | 0,282 | 4,590    | 0,794 | -1,669 | 9,514E-02 |
| CPIJ009933 | Adenylate kinase isoenzyme 6 homolog                      |                                     | -1,323 | 0,138 | 10,459   | 0,610 | -2,169 | 3,006E-02 |
| CPIJ004871 | Putative uncharacterized protein                          | DNA-directed RNA polymerase         | -1,320 | 0,189 | 8,791    | 0,671 | -1,966 | 4,933E-02 |
| CPIJ011274 | Putative uncharacterized protein                          | Cytochrome oxidase complex assem    | -1,320 | 0,256 | 5,826    | 0,757 | -1,742 | 8,144E-02 |
| CPIJ016095 | mediator complex, subunit, putative                       |                                     | -1,317 | 0,096 | 12,476   | 0,556 | -2,367 | 1,793E-02 |
| CPIJ008693 | Putative uncharacterized protein                          | Neurochondrin/leucine-rich protein  | -1,316 | 0,166 | 8,680    | 0,641 | -2,053 | 4,007E-02 |
| CPIJ003160 | Pre-mRNA splicing factor ATP-dependent RNA helicase PRP16 |                                     | -1,313 | 0,169 | 7,877    | 0,644 | -2,040 | 4,134E-02 |
| CPIJ007989 | Porphobilinogen deaminase                                 |                                     | -1,313 | 0,204 | 6,958    | 0,689 | -1,906 | 5,670E-02 |
| CPIJ003826 | serine proteases 1/2 precursor                            |                                     | -1,307 | 0,149 | 1046,153 | 0,616 | -2,123 | 3,377E-02 |
| CPIJ009956 | D-amino acid oxidase                                      |                                     | -1,304 | 0,046 | 17,909   | 0,477 | -2,736 | 6,227E-03 |
| CPIJ020105 | apolipoprotein D, putative                                |                                     | -1,302 | 0,212 | 7,490    | 0,692 | -1,882 | 5,985E-02 |

|            |                                                                      |                                     |        |       |         |       |        |           |
|------------|----------------------------------------------------------------------|-------------------------------------|--------|-------|---------|-------|--------|-----------|
| CPIJ002644 | 28S ribosomal protein S18b, mitochondrial precursor                  |                                     | -1,302 | 0,132 | 12,230  | 0,594 | -2,194 | 2,824E-02 |
| CPIJ015650 | Sulfotransferase 1A1                                                 |                                     | -1,301 | 0,056 | 17,932  | 0,493 | -2,638 | 8,338E-03 |
| CPIJ000730 | Arginyl-tRNA synthetase                                              |                                     | -1,296 | 0,006 | 40,461  | 0,368 | -3,526 | 4,221E-04 |
| CPIJ011934 | Succinyl-CoA:3-ketoacid-coenzyme A transferase                       |                                     | -1,295 | 0,051 | 19,891  | 0,482 | -2,686 | 7,221E-03 |
| CPIJ009344 | Putative uncharacterized protein                                     | Transmembrane protein 186           | -1,295 | 0,159 | 8,783   | 0,621 | -2,084 | 3,712E-02 |
| CPIJ002450 | chaperonin                                                           |                                     | -1,293 | 0,004 | 71,554  | 0,352 | -3,678 | 2,352E-04 |
| CPIJ007145 | Neurobeachin                                                         |                                     | -1,292 | 0,026 | 34,923  | 0,432 | -2,989 | 2,800E-03 |
| CPIJ006776 | Hematopoietic signal peptide-containing membrane domain-containing 1 |                                     | -1,292 | 0,027 | 23,230  | 0,434 | -2,976 | 2,920E-03 |
| CPIJ011727 | Translocon-associated protein subunit gamma                          |                                     | -1,291 | 0,000 | 160,047 | 0,244 | -5,299 | 1,164E-07 |
| CPIJ007468 | Putative uncharacterized protein                                     | Translation machinery-associated pr | -1,289 | 0,026 | 23,005  | 0,431 | -2,990 | 2,793E-03 |
| CPIJ014285 | 3-oxoacyl-[acyl-carrier-protein] reductase                           |                                     | -1,286 | 0,149 | 10,721  | 0,606 | -2,124 | 3,371E-02 |
| CPIJ009348 | Neurotransmitter gated ion channel                                   |                                     | -1,286 | 0,202 | 7,025   | 0,671 | -1,915 | 5,545E-02 |
| CPIJ013728 | GM130                                                                |                                     | -1,285 | 0,130 | 11,532  | 0,583 | -2,203 | 2,756E-02 |
| CPIJ007217 | speckle-type poz protein                                             |                                     | -1,285 | 0,191 | 8,449   | 0,657 | -1,956 | 5,045E-02 |
| CPIJ012182 | Putative uncharacterized protein                                     | CCAAT-binding factor domain-con     | -1,282 | 0,178 | 9,103   | 0,640 | -2,003 | 4,517E-02 |
| CPIJ005886 | polyribonucleotide nucleotidyltransferase 1, mitochondrial precursor |                                     | -1,282 | 0,259 | 5,466   | 0,740 | -1,733 | 8,308E-02 |
| CPIJ017452 | lysyl-tRNA synthetase                                                |                                     | -1,275 | 0,021 | 43,392  | 0,414 | -3,081 | 2,064E-03 |
| CPIJ011412 | M-phase phosphoprotein 11                                            |                                     | -1,272 | 0,101 | 14,034  | 0,544 | -2,339 | 1,936E-02 |
| CPIJ005347 | 26S proteasome non-ATPase regulatory subunit 13                      |                                     | -1,272 | 0,090 | 16,984  | 0,529 | -2,406 | 1,612E-02 |
| CPIJ015730 | apolipoprotein D, putative                                           |                                     | -1,270 | 0,000 | 358,133 | 0,257 | -4,950 | 7,433E-07 |
| CPIJ011993 | sodium/potassium-dependent atpase beta-2 subunit                     |                                     | -1,268 | 0,398 | 3,150   | 0,914 | -1,388 | 1,652E-01 |
| CPIJ015102 | anionic trypsin-2 precursor                                          |                                     | -1,268 | 0,008 | 48,589  | 0,370 | -3,427 | 6,106E-04 |
| CPIJ014590 | Putative uncharacterized protein                                     | ER membrane protein complex sub     | -1,267 | 0,002 | 58,454  | 0,325 | -3,896 | 9,772E-05 |
| CPIJ014972 | protein FAM20B precursor                                             |                                     | -1,266 | 0,273 | 5,431   | 0,747 | -1,694 | 9,032E-02 |
| CPIJ016525 | Histidyl-tRNA synthetase                                             |                                     | -1,261 | 0,044 | 26,102  | 0,457 | -2,760 | 5,783E-03 |
| CPIJ010121 | Copper-transporting ATPase 1                                         |                                     | -1,260 | 0,258 | 6,511   | 0,726 | -1,737 | 8,246E-02 |
| CPIJ008476 | Putative uncharacterized protein                                     | RRM domain-containing protein       | -1,259 | 0,033 | 22,841  | 0,436 | -2,889 | 3,866E-03 |
| CPIJ017753 | activin receptor type ii                                             |                                     | -1,258 | 0,310 | 4,527   | 0,789 | -1,595 | 1,107E-01 |
| CPIJ006024 | Putative uncharacterized protein                                     | Macoilin                            | -1,254 | 0,303 | 4,633   | 0,777 | -1,613 | 1,067E-01 |
| CPIJ000861 | protein shuttle craft                                                |                                     | -1,251 | 0,012 | 210,012 | 0,382 | -3,276 | 1,054E-03 |
| CPIJ009707 | Putative uncharacterized protein                                     | Nuclear envelope integral membran   | -1,245 | 0,356 | 3,912   | 0,841 | -1,481 | 1,387E-01 |
| CPIJ011854 | CD98hc amino acid transporter protein                                |                                     | -1,243 | 0,049 | 37,288  | 0,460 | -2,703 | 6,863E-03 |
| CPIJ006730 | ATP-dependent RNA helicase DDX55                                     |                                     | -1,242 | 0,130 | 11,425  | 0,564 | -2,203 | 2,759E-02 |
| CPIJ003821 | Sel1l protein                                                        |                                     | -1,241 | 0,000 | 114,328 | 0,278 | -4,462 | 8,110E-06 |
| CPIJ007629 | splicing factor, putative                                            |                                     | -1,241 | 0,378 | 39,108  | 0,867 | -1,431 | 1,524E-01 |
| CPIJ014438 | Sex-determining protein fem-1                                        |                                     | -1,241 | 0,357 | 3,752   | 0,840 | -1,478 | 1,395E-01 |
| CPIJ005754 | B230208H17Rik protein                                                |                                     | -1,240 | 0,355 | 3,926   | 0,835 | -1,485 | 1,376E-01 |
| CPIJ002958 | sterol o-acyltransferase                                             |                                     | -1,239 | 0,089 | 16,805  | 0,514 | -2,414 | 1,579E-02 |

|                                                               |                                               |        |       |          |       |        |           |
|---------------------------------------------------------------|-----------------------------------------------|--------|-------|----------|-------|--------|-----------|
| CPIJ018833 H/ACA ribonucleoprotein complex subunit 3          |                                               | -1,239 | 0,024 | 25,258   | 0,410 | -3,020 | 2,526E-03 |
| CPIJ016096 Ciao1: protein CIAO1                               |                                               | -1,236 | 0,202 | 9,835    | 0,647 | -1,912 | 5,594E-02 |
| CPIJ000243 otefin, putative                                   |                                               | -1,235 | 0,325 | 4,704    | 0,793 | -1,558 | 1,193E-01 |
| CPIJ011259 Eukaryotic translation initiation factor           |                                               | -1,234 | 0,001 | 67,382   | 0,302 | -4,091 | 4,303E-05 |
| CPIJ012635 protein bicaudal D                                 |                                               | -1,234 | 0,331 | 4,539    | 0,799 | -1,544 | 1,225E-01 |
| CPIJ006357 Putative uncharacterized protein                   | C2H2-type domain-containing prote             | -1,233 | 0,425 | 3,152    | 0,931 | -1,324 | 1,853E-01 |
| CPIJ000513 Nuclear pore complex protein Nup155                |                                               | -1,230 | 0,179 | 9,978    | 0,615 | -2,000 | 4,555E-02 |
| CPIJ000716 ion channel nompc                                  |                                               | -1,228 | 0,015 | 47,061   | 0,384 | -3,198 | 1,382E-03 |
| CPIJ003795 Oxidoreductase                                     |                                               | -1,227 | 0,094 | 18,366   | 0,515 | -2,383 | 1,719E-02 |
| CPIJ014970 niemann-Pick C1 protein precursor                  |                                               | -1,223 | 0,000 | 164,799  | 0,241 | -5,083 | 3,718E-07 |
| CPIJ013678 Putative uncharacterized protein                   |                                               | -1,222 | 0,421 | 3,260    | 0,917 | -1,333 | 1,824E-01 |
| CPIJ003550 78 kDa glucose-regulated protein precursor         |                                               | -1,222 | 0,010 | 517,779  | 0,364 | -3,352 | 8,030E-04 |
| CPIJ002873 Breast cancer metastasis-suppressor 1              |                                               | -1,220 | 0,324 | 4,566    | 0,782 | -1,561 | 1,185E-01 |
| CPIJ004173 Juvenile hormone-inducible protein, putative       |                                               | -1,219 | 0,001 | 68,760   | 0,305 | -3,994 | 6,490E-05 |
| CPIJ003850 splicing factor pTSR1, putative                    |                                               | -1,218 | 0,212 | 7,621    | 0,648 | -1,880 | 6,014E-02 |
| CPIJ014085 Nucleoporin-17                                     |                                               | -1,217 | 0,300 | 5,213    | 0,750 | -1,623 | 1,046E-01 |
| CPIJ009629 Zinc finger X-linked protein ZXDA                  |                                               | -1,216 | 0,218 | 7,544    | 0,653 | -1,861 | 6,270E-02 |
| CPIJ003711 E3 ubiquitin-protein ligase MARCH6                 |                                               | -1,215 | 0,218 | 8,742    | 0,653 | -1,861 | 6,271E-02 |
| CPIJ002043 Translocon-associated protein, delta subunit       |                                               | -1,214 | 0,031 | 24,998   | 0,417 | -2,911 | 3,601E-03 |
| CPIJ006601 Putative uncharacterized protein                   |                                               | -1,214 | 0,075 | 17,827   | 0,486 | -2,497 | 1,252E-02 |
| CPIJ019470 3-demethylubiquinone-9 3-methyltransferase         |                                               | -1,213 | 0,007 | 72,945   | 0,347 | -3,498 | 4,689E-04 |
| CPIJ015476 Aspartyl-tRNA synthetase                           |                                               | -1,213 | 0,015 | 71,849   | 0,380 | -3,196 | 1,392E-03 |
| CPIJ017662 Peroxisome biogenesis factor 1                     |                                               | -1,210 | 0,026 | 27,115   | 0,404 | -2,993 | 2,765E-03 |
| CPIJ008679 Oligosaccharyl transferase                         |                                               | -1,210 | 0,000 | 130,191  | 0,282 | -4,296 | 1,736E-05 |
| CPIJ005062 Alpha-amylase                                      |                                               | -1,210 | 0,182 | 1002,886 | 0,607 | -1,991 | 4,643E-02 |
| CPIJ016740 Putative uncharacterized protein                   | Thioesterase domain-containing pro            | -1,209 | 0,147 | 11,716   | 0,567 | -2,133 | 3,296E-02 |
| CPIJ017177 Utp14a protein                                     |                                               | -1,208 | 0,228 | 7,541    | 0,661 | -1,828 | 6,762E-02 |
| CPIJ002941 high choriolytic enzyme 1 precursor                |                                               | -1,207 | 0,002 | 189,132  | 0,309 | -3,908 | 9,321E-05 |
| CPIJ013995 Putative uncharacterized protein                   |                                               | -1,205 | 0,259 | 6,769    | 0,696 | -1,731 | 8,351E-02 |
| CPIJ002337 Ribonucleoside-diphosphate reductase small chain   |                                               | -1,202 | 0,025 | 33,096   | 0,400 | -3,004 | 2,661E-03 |
| CPIJ017344 Cathepsin 1                                        |                                               | -1,201 | 0,294 | 5,869    | 0,734 | -1,637 | 1,017E-01 |
| CPIJ019193 Dihydroceramide delta(4)-desaturase                |                                               | -1,201 | 0,002 | 70,170   | 0,314 | -3,828 | 1,290E-04 |
| CPIJ015513 Putative uncharacterized protein                   | Cation/H <sup>+</sup> exchanger domain-contai | -1,200 | 0,439 | 3,282    | 0,927 | -1,294 | 1,955E-01 |
| CPIJ013401 Mical                                              |                                               | -1,196 | 0,047 | 22,165   | 0,439 | -2,727 | 6,398E-03 |
| CPIJ001411 histone h3 methyltransferase                       |                                               | -1,195 | 0,313 | 5,273    | 0,753 | -1,587 | 1,125E-01 |
| CPIJ003659 peptidyl-tRNA hydrolase 2, mitochondrial precursor |                                               | -1,194 | 0,189 | 9,522    | 0,608 | -1,965 | 4,936E-02 |
| CPIJ001197 Golgi-specific brefeldin a-resistance factor       |                                               | -1,192 | 0,021 | 37,487   | 0,388 | -3,073 | 2,118E-03 |
| CPIJ015212 Aspartyl-tRNA synthetase                           |                                               | -1,192 | 0,008 | 59,575   | 0,346 | -3,449 | 5,634E-04 |
| CPIJ012341 Malic enzyme                                       |                                               | -1,192 | 0,000 | 121,755  | 0,276 | -4,311 | 1,624E-05 |



|                                                                        |                                            |        |       |         |       |        |           |
|------------------------------------------------------------------------|--------------------------------------------|--------|-------|---------|-------|--------|-----------|
| CPIJ012085 SF21                                                        |                                            | -1,187 | 0,063 | 22,688  | 0,461 | -2,577 | 9,976E-03 |
| CPIJ012130 Putative uncharacterized protein                            | Signal recognition particle 19 kDa p       | -1,187 | 0,120 | 13,243  | 0,529 | -2,245 | 2,476E-02 |
| CPIJ006918 Putative uncharacterized protein                            |                                            | -1,186 | 0,043 | 22,866  | 0,429 | -2,765 | 5,700E-03 |
| CPIJ009186 Complement component                                        |                                            | -1,185 | 0,005 | 63,177  | 0,328 | -3,607 | 3,097E-04 |
| CPIJ011590 Putative uncharacterized protein                            | DUF4780 domain-containing protein          | -1,184 | 0,079 | 23,914  | 0,480 | -2,467 | 1,363E-02 |
| CPIJ011246 Heat shock protein 83                                       |                                            | -1,183 | 0,007 | 69,131  | 0,338 | -3,506 | 4,556E-04 |
| CPIJ013940 60S ribosomal protein L6                                    |                                            | -1,183 | 0,198 | 535,843 | 0,612 | -1,932 | 5,340E-02 |
| CPIJ006470 NADH:ubiquinone dehydrogenase, putative                     |                                            | -1,181 | 0,198 | 10,092  | 0,611 | -1,932 | 5,341E-02 |
| CPIJ011714 laminin subunit beta-1 precursor                            |                                            | -1,179 | 0,167 | 13,209  | 0,576 | -2,049 | 4,051E-02 |
| CPIJ006316 Putative uncharacterized protein                            | Interferon-related developmental regulator | -1,178 | 0,106 | 15,484  | 0,509 | -2,313 | 2,072E-02 |
| CPIJ006169 WD repeat protein 74                                        |                                            | -1,177 | 0,179 | 11,110  | 0,589 | -2,001 | 4,544E-02 |
| CPIJ013525 Putative uncharacterized protein                            | SNF2 N-terminal domain-containing protein  | -1,177 | 0,056 | 26,914  | 0,446 | -2,642 | 8,239E-03 |
| CPIJ003817 Putative uncharacterized protein                            | Sugar phosphate transporter domain         | -1,177 | 0,096 | 18,037  | 0,495 | -2,375 | 1,755E-02 |
| CPIJ011857 Putative uncharacterized protein                            | Cytochrome b5 heme-binding domain          | -1,175 | 0,348 | 4,408   | 0,782 | -1,502 | 1,331E-01 |
| CPIJ001183 39S ribosomal protein L41, mitochondrial precursor          |                                            | -1,173 | 0,202 | 9,272   | 0,612 | -1,915 | 5,547E-02 |
| CPIJ005508 DNA-J/hsp40                                                 |                                            | -1,171 | 0,001 | 101,565 | 0,288 | -4,060 | 4,901E-05 |
| CPIJ004492 sodium/potassium/calcium exchanger 3 precursor              |                                            | -1,169 | 0,061 | 27,700  | 0,450 | -2,600 | 9,328E-03 |
| CPIJ017446 Transmembrane protein 129                                   |                                            | -1,168 | 0,171 | 12,273  | 0,575 | -2,033 | 4,209E-02 |
| CPIJ002784 eukaryotic translation initiation factor 3 subunit 10       |                                            | -1,168 | 0,009 | 94,814  | 0,343 | -3,402 | 6,680E-04 |
| CPIJ003608 glycerol-3-phosphate dehydrogenase, mitochondrial precursor |                                            | -1,164 | 0,032 | 32,468  | 0,400 | -2,908 | 3,638E-03 |
| CPIJ009320 Ethanolamine-phosphate cytidyltransferase                   |                                            | -1,164 | 0,068 | 33,916  | 0,458 | -2,544 | 1,097E-02 |
| CPIJ015964 Brain protein 16                                            |                                            | -1,163 | 0,324 | 5,224   | 0,745 | -1,562 | 1,184E-01 |
| CPIJ008453 Putative uncharacterized protein                            |                                            | -1,162 | 0,275 | 6,512   | 0,688 | -1,689 | 9,125E-02 |
| CPIJ007376 Calreticulin                                                |                                            | -1,160 | 0,016 | 516,016 | 0,364 | -3,188 | 1,430E-03 |
| CPIJ000771 trypsin-2 precursor                                         |                                            | -1,159 | 0,018 | 546,584 | 0,369 | -3,138 | 1,701E-03 |
| CPIJ003279 Tryptophanyl-tRNA synthetase                                |                                            | -1,159 | 0,002 | 80,430  | 0,299 | -3,883 | 1,032E-04 |
| CPIJ040862 Putative uncharacterized protein                            | Citrate synthase                           | -1,159 | 0,028 | 44,429  | 0,391 | -2,962 | 3,061E-03 |
| CPIJ006575 cue: low-density lipoprotein receptor                       |                                            | -1,157 | 0,044 | 28,285  | 0,420 | -2,754 | 5,886E-03 |
| CPIJ000318 cytochrome b5, putative                                     |                                            | -1,157 | 0,457 | 25,215  | 0,923 | -1,253 | 2,101E-01 |
| CPIJ010762 glucosyl/glucuronosyl transferases                          |                                            | -1,156 | 0,192 | 10,432  | 0,591 | -1,955 | 5,058E-02 |
| CPIJ004817 Sodium-dependent phosphate transporter                      |                                            | -1,155 | 0,005 | 70,065  | 0,319 | -3,617 | 2,981E-04 |
| CPIJ008317 TBC1 domain family member 22B                               |                                            | -1,155 | 0,227 | 8,639   | 0,631 | -1,830 | 6,719E-02 |
| CPIJ014041 Putative uncharacterized protein                            | DRBM domain-containing protein             | -1,155 | 0,100 | 18,444  | 0,493 | -2,341 | 1,922E-02 |
| CPIJ001621 molybdenum cofactor synthesis protein 3                     |                                            | -1,154 | 0,096 | 15,945  | 0,486 | -2,373 | 1,766E-02 |
| CPIJ008786 Arginine/serine-rich splicing factor                        |                                            | -1,151 | 0,087 | 18,022  | 0,476 | -2,421 | 1,547E-02 |
| CPIJ004077 3-hydroxy-3-methylglutaryl-coenzyme A reductase             |                                            | -1,151 | 0,209 | 10,557  | 0,609 | -1,890 | 5,879E-02 |
| CPIJ012560 Leucine-rich repeat serine/threonine-protein kinase 1       |                                            | -1,149 | 0,372 | 4,257   | 0,795 | -1,445 | 1,486E-01 |
| CPIJ009498 Adrenodoxin                                                 |                                            | -1,146 | 0,005 | 76,084  | 0,316 | -3,622 | 2,922E-04 |



|                                                                               |                                       |        |       |         |       |        |           |
|-------------------------------------------------------------------------------|---------------------------------------|--------|-------|---------|-------|--------|-----------|
| CPIJ015641 RNA-binding motif protein                                          |                                       | -1,145 | 0,259 | 7,943   | 0,660 | -1,734 | 8,283E-02 |
| CPIJ009790 Putative uncharacterized protein                                   | Tetratricopeptide repeat protein 39B  | -1,144 | 0,077 | 20,817  | 0,461 | -2,480 | 1,316E-02 |
| CPIJ008180 Putative uncharacterized protein                                   |                                       | -1,142 | 0,065 | 35,035  | 0,446 | -2,564 | 1,036E-02 |
| CPIJ000736 chromatin assembly factor-I p150 subunit, putative                 |                                       | -1,141 | 0,217 | 9,306   | 0,612 | -1,864 | 6,234E-02 |
| CPIJ012850 Splicing factor u2af large subunit                                 |                                       | -1,137 | 0,049 | 28,996  | 0,421 | -2,704 | 6,860E-03 |
| CPIJ019926 Uncharacterized protein (Fragment)                                 |                                       | -1,137 | 0,204 | 9,404   | 0,596 | -1,907 | 5,647E-02 |
| CPIJ005163 Putative uncharacterized protein                                   | 5-formyltetrahydrofolate cyclo-ligas  | -1,136 | 0,116 | 20,209  | 0,501 | -2,266 | 2,347E-02 |
| CPIJ004697 Putative uncharacterized protein                                   |                                       | -1,134 | 0,247 | 7,956   | 0,640 | -1,771 | 7,661E-02 |
| CPIJ000466 Putative uncharacterized protein                                   | TLDc domain-containing protein        | -1,132 | 0,075 | 20,635  | 0,453 | -2,497 | 1,254E-02 |
| CPIJ002542 Mitochondrial import receptor subunit tom40                        |                                       | -1,129 | 0,063 | 25,967  | 0,438 | -2,576 | 9,994E-03 |
| CPIJ004982 Rho guanine exchange factor                                        |                                       | -1,129 | 0,335 | 5,801   | 0,735 | -1,535 | 1,248E-01 |
| CPIJ001445 eukaryotic translation initiation factor 3 subunit                 |                                       | -1,129 | 0,100 | 25,799  | 0,481 | -2,346 | 1,898E-02 |
| CPIJ014581 aldehyde dehydrogenase, mitochondrial                              |                                       | -1,128 | 0,000 | 952,940 | 0,223 | -5,053 | 4,342E-07 |
| CPIJ001894 Prolyl endopeptidase                                               |                                       | -1,128 | 0,152 | 15,424  | 0,534 | -2,110 | 3,482E-02 |
| CPIJ001612 heterogeneous nuclear ribonucleoprotein, putative                  |                                       | -1,127 | 0,007 | 69,557  | 0,323 | -3,487 | 4,890E-04 |
| CPIJ006465 Smap1                                                              |                                       | -1,123 | 0,246 | 9,703   | 0,632 | -1,777 | 7,551E-02 |
| CPIJ013753 Small glutamine-rich tetratricopeptide repeat-containing protein A |                                       | -1,121 | 0,069 | 23,946  | 0,442 | -2,535 | 1,125E-02 |
| CPIJ005390 Putative uncharacterized protein                                   | TP53-regulated inhibitor of apoptosis | -1,121 | 0,186 | 11,525  | 0,568 | -1,973 | 4,845E-02 |
| CPIJ003856 Zinc finger protein                                                |                                       | -1,120 | 0,444 | 3,809   | 0,873 | -1,282 | 1,998E-01 |
| CPIJ014132 CGI-07 protein                                                     |                                       | -1,119 | 0,164 | 20,426  | 0,543 | -2,061 | 3,929E-02 |
| CPIJ009684 Mitochondrial 28S ribosomal protein S14                            |                                       | -1,117 | 0,231 | 9,864   | 0,615 | -1,817 | 6,919E-02 |
| CPIJ005690 ASNA1: arsenical pump-driving ATPase                               |                                       | -1,117 | 0,042 | 26,529  | 0,401 | -2,784 | 5,371E-03 |
| CPIJ019666 tRNA pseudouridine synthase A                                      |                                       | -1,116 | 0,380 | 4,367   | 0,783 | -1,426 | 1,539E-01 |
| CPIJ005084 Coiled-coil domain-containing protein 124                          |                                       | -1,116 | 0,164 | 12,706  | 0,541 | -2,062 | 3,925E-02 |
| CPIJ008812 Sodium-dependent phosphate transporter                             |                                       | -1,115 | 0,046 | 76,991  | 0,407 | -2,740 | 6,146E-03 |
| CPIJ008853 Maltose phosphorylase                                              |                                       | -1,115 | 0,000 | 172,841 | 0,262 | -4,263 | 2,018E-05 |
| CPIJ009445 DEAD box ATP-dependent RNA helicase                                |                                       | -1,115 | 0,008 | 287,446 | 0,325 | -3,432 | 5,984E-04 |
| CPIJ017609 CYP6CD3: cytochrome P450 6CD3                                      |                                       | -1,115 | 0,092 | 19,811  | 0,466 | -2,393 | 1,673E-02 |
| CPIJ004309 Nucleolar essential protein 1                                      |                                       | -1,113 | 0,262 | 7,856   | 0,645 | -1,725 | 8,449E-02 |
| CPIJ009003 Putative uncharacterized protein                                   | Sulfiredoxin                          | -1,111 | 0,136 | 14,250  | 0,510 | -2,178 | 2,938E-02 |
| CPIJ008447 Amine oxidase                                                      |                                       | -1,111 | 0,052 | 31,187  | 0,415 | -2,679 | 7,381E-03 |
| CPIJ003754 Putative uncharacterized protein                                   | FIP-RBD domain-containing protein     | -1,111 | 0,190 | 11,246  | 0,566 | -1,962 | 4,977E-02 |
| CPIJ002430 Cytidine deaminase                                                 |                                       | -1,110 | 0,016 | 53,272  | 0,350 | -3,173 | 1,509E-03 |
| CPIJ005137 Sec61 protein complex gamma subunit, putative                      |                                       | -1,110 | 0,000 | 273,315 | 0,223 | -4,970 | 6,679E-07 |
| CPIJ006347 actin binding protein, putative                                    |                                       | -1,106 | 0,037 | 38,003  | 0,389 | -2,845 | 4,437E-03 |
| CPIJ006777 Putative uncharacterized protein                                   | Large ribosomal subunit protein mL    | -1,105 | 0,158 | 16,524  | 0,530 | -2,087 | 3,692E-02 |
| CPIJ000204 Putative uncharacterized protein                                   | Folliculin                            | -1,104 | 0,336 | 5,786   | 0,722 | -1,530 | 1,259E-01 |
| CPIJ005349 lysosomal acid lipase, putative                                    |                                       | -1,102 | 0,338 | 5,946   | 0,723 | -1,525 | 1,274E-01 |

|                                                                     |                                     |        |       |         |       |        |           |
|---------------------------------------------------------------------|-------------------------------------|--------|-------|---------|-------|--------|-----------|
| CPIJ012005 Putative uncharacterized protein                         |                                     | -1,102 | 0,225 | 10,348  | 0,599 | -1,839 | 6,594E-02 |
| CPIJ013961 GPI mannosyltransferase 3                                |                                     | -1,102 | 0,145 | 14,793  | 0,515 | -2,140 | 3,232E-02 |
| CPIJ014059 NADP-dependent leukotriene B4 12-hydroxydehydrogenase    |                                     | -1,102 | 0,154 | 14,992  | 0,524 | -2,101 | 3,566E-02 |
| CPIJ009515 Gp210                                                    |                                     | -1,101 | 0,141 | 14,705  | 0,511 | -2,156 | 3,104E-02 |
| CPIJ001140 Rhomboid-like protein                                    |                                     | -1,099 | 0,483 | 2,954   | 0,921 | -1,193 | 2,330E-01 |
| CPIJ010486 glycyl-tRNA synthetase                                   |                                     | -1,098 | 0,049 | 45,879  | 0,406 | -2,702 | 6,889E-03 |
| CPIJ002096 Importin-7                                               |                                     | -1,096 | 0,018 | 70,193  | 0,349 | -3,141 | 1,682E-03 |
| CPIJ003570 Putative uncharacterized protein                         | Mitochondrial import inner membra   | -1,095 | 0,189 | 12,499  | 0,557 | -1,966 | 4,928E-02 |
| CPIJ011277 Vacuolar protein sorting-associated protein 26B-B        |                                     | -1,093 | 0,193 | 11,843  | 0,561 | -1,948 | 5,144E-02 |
| CPIJ003395 Reductase protein                                        |                                     | -1,092 | 0,001 | 167,734 | 0,258 | -4,232 | 2,321E-05 |
| CPIJ011244 Heat shock protein 83                                    |                                     | -1,091 | 0,051 | 32,946  | 0,406 | -2,685 | 7,242E-03 |
| CPIJ019831 Putative uncharacterized protein                         | Methyltransferase type 11 domain-c  | -1,091 | 0,291 | 7,170   | 0,664 | -1,643 | 1,003E-01 |
| CPIJ018629 Glutathione-s-transferase theta, gst                     |                                     | -1,091 | 0,000 | 315,815 | 0,246 | -4,426 | 9,619E-06 |
| CPIJ004406 Coatomer                                                 |                                     | -1,090 | 0,057 | 31,508  | 0,414 | -2,634 | 8,429E-03 |
| CPIJ015801 mitogen activated protein kinase kinase 2, mapkk2, mek2  |                                     | -1,087 | 0,298 | 6,867   | 0,668 | -1,626 | 1,039E-01 |
| CPIJ000241 Ubiquitin carboxyl-terminal hydrolase 43                 |                                     | -1,087 | 0,221 | 10,459  | 0,586 | -1,853 | 6,383E-02 |
| CPIJ020331 Oxidoreductase (Fragment)                                |                                     | -1,087 | 0,186 | 18,853  | 0,550 | -1,977 | 4,805E-02 |
| CPIJ015685 3-oxoacyl-[acyl-carrier-protein] reductase               |                                     | -1,084 | 0,492 | 3,014   | 0,923 | -1,175 | 2,398E-01 |
| CPIJ009423 WD repeat protein                                        |                                     | -1,084 | 0,275 | 8,446   | 0,643 | -1,687 | 9,156E-02 |
| CPIJ011366 Mitochondrial ribosomal protein S31                      |                                     | -1,081 | 0,154 | 14,884  | 0,514 | -2,102 | 3,556E-02 |
| CPIJ007987 ATP-dependent RNA helicase DRS1                          |                                     | -1,079 | 0,054 | 29,572  | 0,406 | -2,657 | 7,888E-03 |
| CPIJ013673 mRpl11: 39S ribosomal protein L11, mitochondrial         |                                     | -1,079 | 0,172 | 14,386  | 0,532 | -2,027 | 4,264E-02 |
| CPIJ006946 Prosalpa2: 26S proteasome alpha 2 subunit                |                                     | -1,079 | 0,199 | 13,344  | 0,560 | -1,927 | 5,400E-02 |
| CPIJ017520 U3 small nucleolar ribonucleoprotein protein IMP3        |                                     | -1,079 | 0,104 | 18,849  | 0,464 | -2,322 | 2,021E-02 |
| CPIJ005343 glucosylceramidase precursor                             |                                     | -1,077 | 0,160 | 13,333  | 0,518 | -2,079 | 3,765E-02 |
| CPIJ009281 Sec24B protein, putative                                 |                                     | -1,077 | 0,071 | 41,726  | 0,427 | -2,523 | 1,162E-02 |
| CPIJ010002 T-complex protein 1 subunit gamma                        |                                     | -1,075 | 0,096 | 24,134  | 0,454 | -2,367 | 1,793E-02 |
| CPIJ013616 trypsin 5 precursor                                      |                                     | -1,075 | 0,246 | 14,020  | 0,605 | -1,775 | 7,585E-02 |
| CPIJ004080 T-complex protein 1 subunit alpha                        |                                     | -1,071 | 0,026 | 71,844  | 0,357 | -3,000 | 2,701E-03 |
| CPIJ006599 mannosyl-oligosaccharide alpha-1,2-mannosidase, putative |                                     | -1,068 | 0,059 | 24,886  | 0,408 | -2,616 | 8,907E-03 |
| CPIJ014804 ATP-dependent RNA helicase A                             |                                     | -1,067 | 0,226 | 10,527  | 0,581 | -1,836 | 6,638E-02 |
| CPIJ002452 ubiquitin thioesterase OTUB1                             |                                     | -1,066 | 0,161 | 14,987  | 0,514 | -2,073 | 3,818E-02 |
| CPIJ016405 protein FAM18B                                           |                                     | -1,066 | 0,172 | 13,876  | 0,526 | -2,028 | 4,261E-02 |
| CPIJ015634 Putative uncharacterized protein                         |                                     | -1,065 | 0,217 | 13,765  | 0,572 | -1,863 | 6,249E-02 |
| CPIJ012476 Putative uncharacterized protein                         | N-acetyltransferase domain-containi | -1,065 | 0,289 | 7,642   | 0,646 | -1,649 | 9,917E-02 |
| CPIJ002123 Rsl1d1 protein                                           |                                     | -1,065 | 0,144 | 19,603  | 0,496 | -2,145 | 3,195E-02 |
| CPIJ001807 Carbonic anhydrase                                       |                                     | -1,065 | 0,018 | 49,623  | 0,339 | -3,143 | 1,675E-03 |
| CPIJ002098 chymotrypsin BI precursor                                |                                     | -1,064 | 0,365 | 5,376   | 0,728 | -1,461 | 1,439E-01 |

|                                                                              |                                    |        |       |         |       |        |           |
|------------------------------------------------------------------------------|------------------------------------|--------|-------|---------|-------|--------|-----------|
| CPIJ014696 Four way stop                                                     |                                    | -1,063 | 0,251 | 8,958   | 0,605 | -1,759 | 7,861E-02 |
| CPIJ008184 60S ribosomal protein L35a                                        |                                    | -1,063 | 0,109 | 52,711  | 0,463 | -2,297 | 2,162E-02 |
| CPIJ007348 Nuclear movement protein nudC                                     |                                    | -1,063 | 0,249 | 9,593   | 0,601 | -1,767 | 7,720E-02 |
| CPIJ011127 CYP4H34: cytochrome P450 4H34                                     |                                    | -1,062 | 0,058 | 83,729  | 0,404 | -2,626 | 8,638E-03 |
| CPIJ004890 Putative uncharacterized protein                                  | Ribosomal protein S4/S9 N-terminal | -1,061 | 0,492 | 34,447  | 0,903 | -1,175 | 2,401E-01 |
| CPIJ008163 Skeletal muscle/kidney enriched inositol 5-phosphatase            |                                    | -1,061 | 0,212 | 12,456  | 0,564 | -1,882 | 5,985E-02 |
| CPIJ013965 cation efflux protein/ zinc transporter, putative                 |                                    | -1,061 | 0,104 | 33,066  | 0,456 | -2,324 | 2,011E-02 |
| CPIJ004664 Putative uncharacterized protein                                  | 6-phosphofructo-2-kinase domain-co | -1,060 | 0,044 | 35,919  | 0,384 | -2,759 | 5,796E-03 |
| CPIJ004572 O-linked N-acetylglucosamine transferase, ogt                     |                                    | -1,057 | 0,201 | 11,185  | 0,551 | -1,919 | 5,497E-02 |
| CPIJ018608 Putative uncharacterized protein                                  | KH homology domain-containing pr   | -1,057 | 0,457 | 3,545   | 0,843 | -1,253 | 2,101E-01 |
| CPIJ013329 peptidyl-prolyl cis-trans isomerase NIMA-interacting 4            |                                    | -1,055 | 0,160 | 15,089  | 0,508 | -2,077 | 3,776E-02 |
| CPIJ003176 Putative uncharacterized protein                                  |                                    | -1,055 | 0,160 | 15,998  | 0,508 | -2,077 | 3,779E-02 |
| CPIJ010578 Putative uncharacterized protein                                  | C2H2-type domain-containing prote  | -1,053 | 0,175 | 14,980  | 0,522 | -2,017 | 4,374E-02 |
| CPIJ000602 sulfate transporter, putative                                     |                                    | -1,053 | 0,367 | 6,323   | 0,723 | -1,457 | 1,451E-01 |
| CPIJ008675 Diphthine synthase                                                |                                    | -1,050 | 0,253 | 12,200  | 0,599 | -1,752 | 7,973E-02 |
| CPIJ015409 Cleavage and polyadenylation specificity factor                   |                                    | -1,050 | 0,204 | 11,997  | 0,551 | -1,908 | 5,641E-02 |
| CPIJ002953 FACT complex subunit SSRP1                                        |                                    | -1,050 | 0,246 | 9,541   | 0,592 | -1,775 | 7,591E-02 |
| CPIJ001676 CDP-diacylglycerol-glycerol-3-phosphate 3-phosphatidyltransferase |                                    | -1,050 | 0,302 | 7,465   | 0,650 | -1,616 | 1,062E-01 |
| CPIJ017562 39S ribosomal protein L22, mitochondrial precursor                |                                    | -1,049 | 0,232 | 12,245  | 0,578 | -1,814 | 6,974E-02 |
| CPIJ001516 Putative uncharacterized protein                                  |                                    | -1,048 | 0,339 | 6,671   | 0,688 | -1,522 | 1,279E-01 |
| CPIJ007073 protein l(2)37Cc                                                  |                                    | -1,048 | 0,002 | 94,856  | 0,270 | -3,882 | 1,036E-04 |
| CPIJ013454 Sec63                                                             |                                    | -1,047 | 0,076 | 41,912  | 0,421 | -2,485 | 1,295E-02 |
| CPIJ005564 26S proteasome non-ATPase regulatory subunit 9                    |                                    | -1,046 | 0,301 | 7,725   | 0,646 | -1,619 | 1,054E-01 |
| CPIJ012539 Organic cation transporter protein                                |                                    | -1,045 | 0,096 | 26,185  | 0,442 | -2,367 | 1,792E-02 |
| CPIJ007229 tyrosyl-tRNA synthetase                                           |                                    | -1,041 | 0,037 | 38,536  | 0,367 | -2,839 | 4,532E-03 |
| CPIJ009363 U3 small nucleolar ribonucleoprotein protein MPP10                |                                    | -1,041 | 0,197 | 14,296  | 0,537 | -1,937 | 5,279E-02 |
| CPIJ006480 40S ribosomal protein S26                                         |                                    | -1,041 | 0,043 | 402,710 | 0,377 | -2,763 | 5,725E-03 |
| CPIJ016441 Ubiquitin carboxyl-terminal hydrolase                             |                                    | -1,039 | 0,017 | 59,324  | 0,328 | -3,165 | 1,553E-03 |
| CPIJ013752 Acyl-CoA Delta(11) desaturase                                     |                                    | -1,039 | 0,000 | 188,310 | 0,240 | -4,328 | 1,506E-05 |
| CPIJ000912 Peptidyl-prolyl cis-trans isomerase cyp6                          |                                    | -1,039 | 0,254 | 10,825  | 0,594 | -1,748 | 8,044E-02 |
| CPIJ003981 15 kDa selenoprotein precursor                                    |                                    | -1,037 | 0,124 | 20,712  | 0,465 | -2,230 | 2,578E-02 |
| CPIJ012743 60S ribosomal protein L7                                          |                                    | -1,037 | 0,168 | 24,744  | 0,508 | -2,042 | 4,117E-02 |
| CPIJ017243 CYP304B4: cytochrome P450 304B4                                   |                                    | -1,037 | 0,049 | 82,997  | 0,383 | -2,709 | 6,743E-03 |
| CPIJ000857 Putative uncharacterized protein                                  |                                    | -1,036 | 0,398 | 4,764   | 0,748 | -1,384 | 1,663E-01 |
| CPIJ017744 Sterol desaturase                                                 |                                    | -1,035 | 0,400 | 4,966   | 0,750 | -1,380 | 1,677E-01 |
| CPIJ005612 whd: protein withered, carnitine O-palmitoyltransferase           |                                    | -1,035 | 0,037 | 85,244  | 0,364 | -2,839 | 4,524E-03 |
| CPIJ007693 Putative uncharacterized protein                                  | DUF3456 domain-containing protei   | -1,034 | 0,041 | 113,505 | 0,370 | -2,794 | 5,198E-03 |
| CPIJ002780 Sur-8: leucine-rich repeat protein SHOC-2                         |                                    | -1,034 | 0,300 | 7,786   | 0,637 | -1,622 | 1,049E-01 |

|            |                                                       |                                     |        |       |         |       |        |           |
|------------|-------------------------------------------------------|-------------------------------------|--------|-------|---------|-------|--------|-----------|
| CPIJ010328 | 39S ribosomal protein L51, mitochondrial precursor    |                                     | -1,033 | 0,275 | 8,998   | 0,612 | -1,688 | 9,135E-02 |
| CPIJ005552 | thioredoxin reductase 1, mitochondrial precursor      |                                     | -1,032 | 0,027 | 74,678  | 0,348 | -2,970 | 2,974E-03 |
| CPIJ011652 | Multidrug resistance-associated protein 1             |                                     | -1,032 | 0,231 | 13,705  | 0,568 | -1,817 | 6,928E-02 |
| CPIJ003802 | NADP-dependent leukotriene B4 12-hydroxydehydrogenase |                                     | -1,030 | 0,030 | 217,856 | 0,351 | -2,936 | 3,320E-03 |
| CPIJ013113 | Putative uncharacterized protein                      | Small integral membrane protein 8   | -1,026 | 0,417 | 4,889   | 0,763 | -1,343 | 1,791E-01 |
| CPIJ009694 | tRNA (guanine-N(7)-)-methyltransferase                |                                     | -1,025 | 0,346 | 7,216   | 0,680 | -1,508 | 1,316E-01 |
| CPIJ010781 | secreted ferritin G subunit precursor, putative       |                                     | -1,025 | 0,285 | 14,026  | 0,618 | -1,659 | 9,721E-02 |
| CPIJ016574 | Geranylgeranyl transferase type-1 subunit beta        |                                     | -1,023 | 0,238 | 12,615  | 0,570 | -1,796 | 7,256E-02 |
| CPIJ010187 | Sodium/solute symporter                               |                                     | -1,022 | 0,671 | 6,791   | 1,288 | -0,793 | 4,275E-01 |
| CPIJ003512 | defender against cell death 1                         |                                     | -1,022 | 0,023 | 45,535  | 0,336 | -3,039 | 2,373E-03 |
| CPIJ012562 | 26S proteasome non-ATPase regulatory subunit 10       |                                     | -1,022 | 0,446 | 4,210   | 0,802 | -1,274 | 2,028E-01 |
| CPIJ005868 | Multisynthetase complex auxiliary component p43       |                                     | -1,021 | 0,096 | 28,774  | 0,430 | -2,374 | 1,761E-02 |
| CPIJ012803 | Folate carrier protein                                |                                     | -1,020 | 0,078 | 26,921  | 0,413 | -2,473 | 1,339E-02 |
| CPIJ016471 | Signal transducer and activator of transcription      |                                     | -1,019 | 0,185 | 17,396  | 0,515 | -1,979 | 4,781E-02 |
| CPIJ010680 | Putative uncharacterized protein                      | Mitochondrial 28s ribosomal protein | -1,019 | 0,166 | 18,073  | 0,497 | -2,050 | 4,037E-02 |
| CPIJ002088 | Ubiquitin-related modifier 1 homolog                  |                                     | -1,018 | 0,157 | 16,816  | 0,487 | -2,091 | 3,654E-02 |
| CPIJ003552 | Putative uncharacterized protein                      | Nicalin                             | -1,018 | 0,007 | 70,816  | 0,294 | -3,463 | 5,338E-04 |
| CPIJ010738 | protein FAM96A                                        |                                     | -1,018 | 0,125 | 22,174  | 0,458 | -2,222 | 2,631E-02 |
| CPIJ011856 | E3 ubiquitin-protein ligase MARCH5                    |                                     | -1,017 | 0,185 | 20,524  | 0,514 | -1,981 | 4,761E-02 |
| CPIJ005483 | Putative uncharacterized protein                      | EGF-like domain-containing protein  | -1,017 | 0,156 | 16,844  | 0,486 | -2,093 | 3,638E-02 |
| CPIJ004548 | mitochondrial carrier protein, putative               |                                     | -1,013 | 0,330 | 7,274   | 0,654 | -1,548 | 1,216E-01 |
| CPIJ002691 | Small nuclear ribonucleoprotein F                     |                                     | -1,011 | 0,171 | 14,585  | 0,497 | -2,032 | 4,217E-02 |
| CPIJ002169 | Adenine phosphoribosyltransferase                     |                                     | -1,009 | 0,041 | 34,735  | 0,361 | -2,796 | 5,172E-03 |
| CPIJ007213 | Putative uncharacterized protein                      | Major royal jelly protein           | -1,009 | 0,175 | 19,291  | 0,500 | -2,017 | 4,372E-02 |
| CPIJ007047 | Serine/arginine rich splicing factor                  |                                     | -1,008 | 0,109 | 24,251  | 0,439 | -2,294 | 2,179E-02 |
| CPIJ008648 | Yemanuclein                                           |                                     | -1,008 | 0,186 | 15,646  | 0,510 | -1,976 | 4,814E-02 |
| CPIJ007855 | Zinc finger protein 667                               |                                     | -1,007 | 0,352 | 6,913   | 0,675 | -1,492 | 1,358E-01 |
| CPIJ011327 | Putative uncharacterized protein                      | HTH CENPB-type domain-containi      | -1,006 | 0,422 | 4,799   | 0,755 | -1,332 | 1,828E-01 |
| CPIJ000119 | Kelch domain-containing protein 4                     |                                     | -1,006 | 0,249 | 18,178  | 0,569 | -1,767 | 7,723E-02 |
| CPIJ006563 | UDP-sugar transporter UST74c                          |                                     | -1,005 | 0,254 | 10,962  | 0,574 | -1,750 | 8,015E-02 |
| CPIJ011219 | Vacuolar protein sorting-associated protein 29        |                                     | -1,004 | 0,269 | 9,915   | 0,588 | -1,708 | 8,756E-02 |
| CPIJ007234 | AdoMet-dependent rRNA methyltransferase spb1          |                                     | -1,004 | 0,141 | 27,308  | 0,466 | -2,155 | 3,120E-02 |
| CPIJ010373 | F-actin capping protein subunit beta                  |                                     | -1,004 | 0,036 | 37,935  | 0,352 | -2,854 | 4,317E-03 |
| CPIJ003173 | Putative uncharacterized protein                      | COMM domain-containing protein 4    | -1,003 | 0,440 | 5,669   | 0,776 | -1,292 | 1,963E-01 |
| CPIJ014053 | Glutathione-s-transferase theta, gst                  |                                     | -1,003 | 0,079 | 28,687  | 0,406 | -2,470 | 1,350E-02 |
| CPIJ019500 | Putative uncharacterized protein                      | ADF-H domain-containing protein     | -1,003 | 0,063 | 31,224  | 0,388 | -2,585 | 9,751E-03 |
| CPIJ003801 | NADP-dependent leukotriene B4 12-hydroxydehydrogenase |                                     | -1,002 | 0,031 | 44,302  | 0,343 | -2,919 | 3,507E-03 |
| CPIJ017179 | scaffold attachment factor B, putative                |                                     | -1,002 | 0,132 | 19,811  | 0,456 | -2,197 | 2,805E-02 |

|                                                                |                                      |       |       |          |       |       |           |
|----------------------------------------------------------------|--------------------------------------|-------|-------|----------|-------|-------|-----------|
| CPIJ001998 1-acyl-sn-glycerol-3-phosphate acyltransferase      |                                      | 1,002 | 0,050 | 31,342   | 0,372 | 2,696 | 7,016E-03 |
| CPIJ002130 kallikrein-7 precursor                              |                                      | 1,005 | 0,243 | 19,065   | 0,563 | 1,785 | 7,421E-02 |
| CPIJ007311 Putative uncharacterized protein                    | 5-oxoprolinase                       | 1,011 | 0,001 | 119,770  | 0,255 | 3,972 | 7,122E-05 |
| CPIJ000050 Carboxylesterase                                    |                                      | 1,012 | 0,015 | 70,484   | 0,315 | 3,211 | 1,325E-03 |
| CPIJ015919 Putative uncharacterized protein                    | CHK kinase-like domain-containing    | 1,014 | 0,051 | 56,901   | 0,377 | 2,689 | 7,163E-03 |
| CPIJ009225 Aquaporin                                           |                                      | 1,017 | 0,035 | 49,659   | 0,354 | 2,872 | 4,081E-03 |
| CPIJ000863 6-pyruvoyl tetrahydrobiopterin synthase             |                                      | 1,018 | 0,056 | 49,980   | 0,385 | 2,644 | 8,201E-03 |
| CPIJ000317 Putative uncharacterized protein                    |                                      | 1,020 | 0,205 | 13,531   | 0,536 | 1,903 | 5,706E-02 |
| CPIJ015334 serine/threonine-protein kinase NIM1                |                                      | 1,021 | 0,202 | 11,186   | 0,533 | 1,915 | 5,544E-02 |
| CPIJ008797 Putative uncharacterized protein                    | gamma-glutamylcyclotransferase       | 1,021 | 0,065 | 29,693   | 0,399 | 2,561 | 1,043E-02 |
| CPIJ005974 Putative uncharacterized protein                    | Alpha 2-macroglobulin receptor-ass   | 1,022 | 0,043 | 31,317   | 0,369 | 2,771 | 5,596E-03 |
| CPIJ007727 Fibrinogen and fibronectin                          |                                      | 1,024 | 0,000 | 179,131  | 0,236 | 4,332 | 1,475E-05 |
| CPIJ008952 Putative uncharacterized protein                    |                                      | 1,025 | 0,080 | 25,139   | 0,416 | 2,462 | 1,382E-02 |
| CPIJ009478 CYP4D42: cytochrome P450 4D42                       |                                      | 1,027 | 0,005 | 280,149  | 0,287 | 3,576 | 3,484E-04 |
| CPIJ004086 Angiotensin-converting enzyme                       |                                      | 1,030 | 0,001 | 1698,396 | 0,243 | 4,240 | 2,238E-05 |
| CPIJ017918 pseudouridylate synthase                            |                                      | 1,031 | 0,202 | 11,523   | 0,538 | 1,916 | 5,541E-02 |
| CPIJ015662 Ecto ADP-ribosylhydrolase                           |                                      | 1,032 | 0,026 | 45,290   | 0,345 | 2,988 | 2,804E-03 |
| CPIJ002536 CYP6AG10: cytochrome P450 6AG10                     |                                      | 1,032 | 0,015 | 271,214  | 0,321 | 3,212 | 1,317E-03 |
| CPIJ011266 Putative uncharacterized protein                    | Tetraspanin                          | 1,033 | 0,200 | 10,701   | 0,537 | 1,923 | 5,445E-02 |
| CPIJ000017 Putative uncharacterized protein                    | C3H1-type domain-containing prote    | 1,035 | 0,307 | 5,966    | 0,646 | 1,603 | 1,090E-01 |
| CPIJ019219 Putative uncharacterized protein                    |                                      | 1,037 | 0,176 | 11,705   | 0,515 | 2,013 | 4,408E-02 |
| CPIJ003945 three prime repair exonuclease 1, putative          |                                      | 1,037 | 0,020 | 200,697  | 0,336 | 3,091 | 1,995E-03 |
| CPIJ002140 chymotrypsin BI precursor                           |                                      | 1,039 | 0,006 | 590,293  | 0,295 | 3,520 | 4,321E-04 |
| CPIJ013934 Xanthine dehydrogenase/oxidase                      |                                      | 1,039 | 0,090 | 30,887   | 0,432 | 2,404 | 1,623E-02 |
| CPIJ003432 Aldehyde dehydrogenase                              |                                      | 1,040 | 0,005 | 486,171  | 0,292 | 3,562 | 3,677E-04 |
| CPIJ009306 neutral alpha-glucosidase ab precursor              |                                      | 1,044 | 0,148 | 28,341   | 0,490 | 2,129 | 3,326E-02 |
| CPIJ003335 Putative uncharacterized protein                    | SAM domain-containing protein        | 1,045 | 0,178 | 12,892   | 0,522 | 2,003 | 4,521E-02 |
| CPIJ001939 Putative uncharacterized protein                    |                                      | 1,046 | 0,228 | 8,885    | 0,573 | 1,826 | 6,783E-02 |
| CPIJ001052 aminopeptidase 2, mitochondrial precursor           |                                      | 1,047 | 0,006 | 73,374   | 0,296 | 3,533 | 4,108E-04 |
| CPIJ011721 Putative uncharacterized protein                    | MIF4G domain-containing protein      | 1,047 | 0,121 | 18,325   | 0,468 | 2,240 | 2,509E-02 |
| CPIJ005824 Maternal tudor protein                              |                                      | 1,049 | 0,019 | 43,022   | 0,337 | 3,112 | 1,860E-03 |
| CPIJ020219 Putative uncharacterized protein                    | chloroplast protein-transporting ATl | 1,051 | 0,106 | 18,667   | 0,454 | 2,313 | 2,075E-02 |
| CPIJ002825 Predicted protein                                   |                                      | 1,053 | 0,056 | 23,888   | 0,398 | 2,642 | 8,248E-03 |
| CPIJ014232 Putative uncharacterized protein                    | Hemolymph juvenile hormone bindi     | 1,054 | 0,141 | 17,729   | 0,489 | 2,155 | 3,113E-02 |
| CPIJ002537 CYP6AG11: cytochrome P450 6AG11                     |                                      | 1,055 | 0,002 | 2685,013 | 0,269 | 3,923 | 8,739E-05 |
| CPIJ015049 Putative uncharacterized protein                    |                                      | 1,056 | 0,277 | 7,634    | 0,628 | 1,680 | 9,288E-02 |
| CPIJ016398 GTP-binding protein (I) alpha subunit               |                                      | 1,056 | 0,296 | 6,659    | 0,647 | 1,632 | 1,027E-01 |
| CPIJ005191 leucine-rich repeat-containing protein 15 precursor |                                      | 1,058 | 0,001 | 645,958  | 0,250 | 4,228 | 2,361E-05 |

|                                                                         |                                             |       |       |         |       |       |           |
|-------------------------------------------------------------------------|---------------------------------------------|-------|-------|---------|-------|-------|-----------|
| CPIJ008005 annexin x                                                    |                                             | 1,058 | 0,106 | 20,650  | 0,458 | 2,309 | 2,094E-02 |
| CPIJ008195 Putative uncharacterized protein                             | RanBP2-type domain-containing protein       | 1,060 | 0,120 | 17,494  | 0,472 | 2,246 | 2,468E-02 |
| CPIJ014576 Putative uncharacterized protein                             | Cysteine-rich domain-containing protein     | 1,062 | 0,019 | 36,610  | 0,341 | 3,114 | 1,845E-03 |
| CPIJ019722 GTP binding protein                                          |                                             | 1,063 | 0,104 | 16,303  | 0,457 | 2,324 | 2,010E-02 |
| CPIJ017227 phospholipase D3                                             |                                             | 1,063 | 0,082 | 20,150  | 0,433 | 2,452 | 1,422E-02 |
| CPIJ008065 Caspase-1                                                    |                                             | 1,064 | 0,007 | 306,393 | 0,306 | 3,474 | 5,122E-04 |
| CPIJ009553 Putative uncharacterized protein                             |                                             | 1,065 | 0,135 | 14,055  | 0,489 | 2,179 | 2,931E-02 |
| CPIJ012751 apl5 protein                                                 |                                             | 1,071 | 0,034 | 31,303  | 0,372 | 2,880 | 3,979E-03 |
| CPIJ008235 Putative uncharacterized protein                             |                                             | 1,072 | 0,294 | 6,854   | 0,654 | 1,638 | 1,015E-01 |
| CPIJ012628 endophilin a, putative                                       |                                             | 1,073 | 0,076 | 22,595  | 0,431 | 2,488 | 1,284E-02 |
| CPIJ003277 U1 small nuclear ribonucleoprotein C                         |                                             | 1,073 | 0,172 | 11,359  | 0,529 | 2,029 | 4,250E-02 |
| CPIJ019524 Putative uncharacterized protein                             |                                             | 1,073 | 0,250 | 8,964   | 0,610 | 1,761 | 7,828E-02 |
| CPIJ010939 Putative uncharacterized protein                             | Cyclin                                      | 1,074 | 0,042 | 36,006  | 0,386 | 2,783 | 5,388E-03 |
| CPIJ018151 Phosphatidylinositol 3-kinase regulatory subunit             |                                             | 1,076 | 0,297 | 6,418   | 0,660 | 1,630 | 1,032E-01 |
| CPIJ007015 Putative uncharacterized protein                             | BHLH domain-containing protein              | 1,076 | 0,133 | 13,628  | 0,492 | 2,189 | 2,863E-02 |
| CPIJ005959 CYP6AA7: cytochrome P450 6AA7                                |                                             | 1,076 | 0,000 | 244,261 | 0,221 | 4,872 | 1,104E-06 |
| CPIJ003134 Formin 1,2/cappuccino                                        |                                             | 1,078 | 0,225 | 8,485   | 0,586 | 1,839 | 6,596E-02 |
| CPIJ000999 Putative uncharacterized protein                             | Leptin receptor gene-related protein        | 1,078 | 0,126 | 16,107  | 0,486 | 2,219 | 2,646E-02 |
| CPIJ005020 LRIM18: leucine-rich immune protein (Coil-less)              |                                             | 1,078 | 0,139 | 13,044  | 0,498 | 2,163 | 3,051E-02 |
| CPIJ009443 Autophagy-specific protein, putative                         |                                             | 1,082 | 0,297 | 6,702   | 0,664 | 1,629 | 1,033E-01 |
| CPIJ016727 Muskulin                                                     |                                             | 1,082 | 0,026 | 33,633  | 0,361 | 2,995 | 2,745E-03 |
| CPIJ006031 Putative uncharacterized protein                             | BPL/LPL catalytic domain-containing protein | 1,083 | 0,001 | 123,457 | 0,273 | 3,962 | 7,425E-05 |
| CPIJ012685 CYP315A1: cytochrome P450 315A1                              |                                             | 1,083 | 0,007 | 647,069 | 0,311 | 3,484 | 4,948E-04 |
| CPIJ003102 protein croquemort                                           |                                             | 1,084 | 0,005 | 259,542 | 0,301 | 3,606 | 3,114E-04 |
| CPIJ007824 esterase B1 precursor                                        |                                             | 1,089 | 0,000 | 249,635 | 0,232 | 4,699 | 2,615E-06 |
| CPIJ007342 Putative uncharacterized protein                             | SET domain-containing protein               | 1,090 | 0,022 | 36,408  | 0,357 | 3,055 | 2,254E-03 |
| CPIJ004355 protein krueppel                                             |                                             | 1,091 | 0,156 | 13,041  | 0,521 | 2,093 | 3,638E-02 |
| CPIJ016990 Putative uncharacterized protein                             |                                             | 1,092 | 0,025 | 32,901  | 0,362 | 3,018 | 2,544E-03 |
| CPIJ010305 CHKov1, putative                                             |                                             | 1,093 | 0,001 | 143,278 | 0,273 | 4,006 | 6,168E-05 |
| CPIJ004088 Guanylyl cyclase receptor                                    |                                             | 1,093 | 0,163 | 12,404  | 0,529 | 2,065 | 3,888E-02 |
| CPIJ010979 phosphatidylcholine-sterol acyltransferase precursor         |                                             | 1,097 | 0,014 | 126,308 | 0,339 | 3,240 | 1,194E-03 |
| CPIJ001556 acyl-coenzyme A oxidase 3                                    |                                             | 1,098 | 0,001 | 400,684 | 0,265 | 4,142 | 3,436E-05 |
| CPIJ007625 Alcohol dehydrogenase                                        |                                             | 1,099 | 0,268 | 7,666   | 0,643 | 1,709 | 8,742E-02 |
| CPIJ016771 peptidoglycan recognition protein precursor                  |                                             | 1,099 | 0,010 | 320,368 | 0,327 | 3,357 | 7,885E-04 |
| CPIJ006516 Putative uncharacterized protein                             |                                             | 1,100 | 0,063 | 20,332  | 0,426 | 2,579 | 9,899E-03 |
| CPIJ006747 Transient receptor potential cation channel protein painless |                                             | 1,100 | 0,137 | 13,259  | 0,506 | 2,174 | 2,970E-02 |
| CPIJ001380 CYP314A1: cytochrome P450 314A1                              |                                             | 1,101 | 0,011 | 58,609  | 0,332 | 3,319 | 9,030E-04 |
| CPIJ007566 Mitochondrial cytochrome c1                                  |                                             | 1,101 | 0,009 | 48,847  | 0,324 | 3,398 | 6,779E-04 |



|                                                                     |                                     |       |       |           |       |       |           |
|---------------------------------------------------------------------|-------------------------------------|-------|-------|-----------|-------|-------|-----------|
| CPIJ002777 Putative uncharacterized protein                         | Transmembrane protein 192           | 1,102 | 0,002 | 110,812   | 0,289 | 3,814 | 1,369E-04 |
| CPIJ005955 CYP6P14: cytochrome P450 6P14                            |                                     | 1,103 | 0,000 | 603,705   | 0,234 | 4,705 | 2,544E-06 |
| CPIJ010921 Monocarboxylate transporter                              |                                     | 1,106 | 0,044 | 24,136    | 0,401 | 2,758 | 5,820E-03 |
| CPIJ003967 Putative uncharacterized protein                         | Chitin-binding type-2 domain-contai | 1,109 | 0,001 | 492,248   | 0,279 | 3,972 | 7,141E-05 |
| CPIJ000124 Putative uncharacterized protein                         |                                     | 1,113 | 0,097 | 15,388    | 0,472 | 2,360 | 1,828E-02 |
| CPIJ001230 Putative uncharacterized protein                         |                                     | 1,117 | 0,151 | 11,404    | 0,528 | 2,117 | 3,425E-02 |
| CPIJ013194 Putative uncharacterized protein                         |                                     | 1,117 | 0,032 | 49,408    | 0,385 | 2,900 | 3,729E-03 |
| CPIJ018721 Putative uncharacterized protein                         |                                     | 1,119 | 0,013 | 74,779    | 0,343 | 3,261 | 1,112E-03 |
| CPIJ000005 Malate synthase                                          |                                     | 1,119 | 0,001 | 199,564   | 0,266 | 4,213 | 2,522E-05 |
| CPIJ003267 sodium/chloride dependent amino acid transporter         |                                     | 1,119 | 0,027 | 73,723    | 0,377 | 2,973 | 2,951E-03 |
| CPIJ005975 Putative uncharacterized protein                         | EF-hand domain-containing protein   | 1,122 | 0,011 | 901,388   | 0,339 | 3,315 | 9,177E-04 |
| CPIJ005303 erk1/2                                                   |                                     | 1,127 | 0,273 | 8,097     | 0,666 | 1,693 | 9,043E-02 |
| CPIJ001670 glycerol-3-phosphate acyltransferase, putative           |                                     | 1,127 | 0,001 | 180,745   | 0,270 | 4,171 | 3,032E-05 |
| CPIJ016156 Putative uncharacterized protein                         | PWWP domain-containing protein      | 1,128 | 0,212 | 7,538     | 0,600 | 1,879 | 6,030E-02 |
| CPIJ015428 CYP6Z10: cytochrome P450 6Z10                            |                                     | 1,128 | 0,000 | 432,795   | 0,227 | 4,977 | 6,444E-07 |
| CPIJ007581 Vanin-like protein 1 precursor, putative                 |                                     | 1,129 | 0,000 | 280,152   | 0,232 | 4,865 | 1,142E-06 |
| CPIJ005050 ATP-binding cassette sub-family A member 3               |                                     | 1,130 | 0,024 | 38,483    | 0,373 | 3,030 | 2,443E-03 |
| CPIJ008128 Putative uncharacterized protein                         | Nuclear respiratory factor 1 NLS/DI | 1,130 | 0,023 | 37,908    | 0,371 | 3,044 | 2,337E-03 |
| CPIJ002518 chymotrypsin 1 precursor                                 |                                     | 1,133 | 0,571 | 17,897    | 1,136 | 0,997 | 3,186E-01 |
| CPIJ016836 Cytochrome c oxidase subunit I                           |                                     | 1,135 | 0,096 | 15,931    | 0,479 | 2,370 | 1,779E-02 |
| CPIJ017461 Aldo-keto reductase                                      |                                     | 1,137 | 0,164 | 10,572    | 0,552 | 2,061 | 3,934E-02 |
| CPIJ000316 Putative uncharacterized protein                         |                                     | 1,137 | 0,000 | 177,507   | 0,266 | 4,266 | 1,987E-05 |
| CPIJ004278 Putative uncharacterized protein                         | Rho-GAP domain-containing protei    | 1,137 | 0,120 | 13,507    | 0,506 | 2,246 | 2,470E-02 |
| CPIJ007938 Asparagine synthetase B                                  |                                     | 1,142 | 0,058 | 37,523    | 0,435 | 2,624 | 8,691E-03 |
| CPIJ010537 CYP9J45: cytochrome P450 9J45                            |                                     | 1,142 | 0,001 | 395,593   | 0,275 | 4,150 | 3,326E-05 |
| CPIJ016827 26S proteasome regulatory subunit S3                     |                                     | 1,142 | 0,131 | 12,997    | 0,519 | 2,200 | 2,779E-02 |
| CPIJ000389 Ubiquitin conjugating enzyme 7 interacting protein       |                                     | 1,142 | 0,182 | 13,404    | 0,574 | 1,992 | 4,640E-02 |
| CPIJ001773 Synaptic vesicle protein                                 |                                     | 1,143 | 0,096 | 21,176    | 0,482 | 2,371 | 1,772E-02 |
| CPIJ019517 lactosylceramide 4-alpha-galactosyltransferase, putative |                                     | 1,144 | 0,000 | 113,219   | 0,265 | 4,322 | 1,543E-05 |
| CPIJ001049 protease m1 zinc metalloprotease                         |                                     | 1,145 | 0,000 | 3273,545  | 0,261 | 4,382 | 1,178E-05 |
| CPIJ006282 serine/threonine protein kinase, putative                |                                     | 1,146 | 0,030 | 86,374    | 0,391 | 2,929 | 3,402E-03 |
| CPIJ011431 Putative uncharacterized protein                         |                                     | 1,147 | 0,000 | 18446,043 | 0,132 | 8,719 | 2,805E-18 |
| CPIJ001758 CYP4H38: cytochrome P450 4H38                            |                                     | 1,148 | 0,001 | 347,150   | 0,289 | 3,973 | 7,111E-05 |
| CPIJ007054 alpha-tocopherol transfer protein                        |                                     | 1,148 | 0,017 | 137,514   | 0,365 | 3,150 | 1,635E-03 |
| CPIJ012872 Putative uncharacterized protein                         | RING-type domain-containing prote   | 1,149 | 0,100 | 14,685    | 0,490 | 2,343 | 1,915E-02 |
| CPIJ015817 Putative uncharacterized protein                         |                                     | 1,151 | 0,130 | 13,247    | 0,522 | 2,206 | 2,741E-02 |
| CPIJ004224 Pancreatic triacylglycerol lipase                        |                                     | 1,151 | 0,009 | 164,087   | 0,339 | 3,393 | 6,917E-04 |
| CPIJ006517 Putative uncharacterized protein                         |                                     | 1,153 | 0,679 | 44,505    | 1,485 | 0,777 | 4,374E-01 |

|                                                              |                                    |       |       |          |       |       |           |
|--------------------------------------------------------------|------------------------------------|-------|-------|----------|-------|-------|-----------|
| CPIJ015223 CYP6F4: cytochrome P450 6F4                       |                                    | 1,153 | 0,002 | 60,377   | 0,302 | 3,822 | 1,325E-04 |
| CPIJ005799 Putative uncharacterized protein                  | C2 tensin-type domain-containing p | 1,156 | 0,154 | 14,796   | 0,550 | 2,103 | 3,546E-02 |
| CPIJ006543 urokinase-type plasminogen activator precursor    |                                    | 1,160 | 0,241 | 7,297    | 0,648 | 1,790 | 7,349E-02 |
| CPIJ007573 ADP-ribosylation factor, arf                      |                                    | 1,161 | 0,176 | 8,813    | 0,577 | 2,012 | 4,425E-02 |
| CPIJ003198 Neuropathy target esterase/swiss cheese           |                                    | 1,161 | 0,007 | 42,631   | 0,335 | 3,465 | 5,312E-04 |
| CPIJ016993 Xaa-pro dipeptidase                               |                                    | 1,161 | 0,019 | 31,466   | 0,374 | 3,109 | 1,875E-03 |
| CPIJ012498 Putative uncharacterized protein                  | HMG box domain-containing protei   | 1,162 | 0,196 | 7,495    | 0,600 | 1,938 | 5,266E-02 |
| CPIJ006370 Tak1                                              |                                    | 1,164 | 0,025 | 31,253   | 0,387 | 3,004 | 2,660E-03 |
| CPIJ008959 Ribulokinase 2                                    |                                    | 1,164 | 0,035 | 24,987   | 0,406 | 2,871 | 4,086E-03 |
| CPIJ000510 Putative uncharacterized protein                  |                                    | 1,168 | 0,193 | 8,378    | 0,600 | 1,947 | 5,148E-02 |
| CPIJ015577 Lola                                              |                                    | 1,168 | 0,132 | 13,052   | 0,532 | 2,196 | 2,811E-02 |
| CPIJ002128 mast cell protease 2 precursor                    |                                    | 1,169 | 0,000 | 826,999  | 0,238 | 4,909 | 9,153E-07 |
| CPIJ001569 Putative uncharacterized protein                  | Titin                              | 1,174 | 0,000 | 425,891  | 0,225 | 5,208 | 1,910E-07 |
| CPIJ003269 broad complex isoform Z4                          |                                    | 1,174 | 0,085 | 14,503   | 0,483 | 2,434 | 1,495E-02 |
| CPIJ001195 Glyoxylate reductase/hydroxypyruvate reductase    |                                    | 1,176 | 0,007 | 52,088   | 0,338 | 3,479 | 5,032E-04 |
| CPIJ018991 serine-type endopeptidase, putative               |                                    | 1,178 | 0,243 | 6,102    | 0,660 | 1,783 | 7,457E-02 |
| CPIJ003349 abc transporter, putative                         |                                    | 1,178 | 0,191 | 7,701    | 0,601 | 1,959 | 5,008E-02 |
| CPIJ009637 sterol desaturase, putative                       |                                    | 1,179 | 0,000 | 410,157  | 0,223 | 5,285 | 1,257E-07 |
| CPIJ011273 39S ribosomal protein 54, mitochondrial precursor |                                    | 1,179 | 0,036 | 23,125   | 0,414 | 2,850 | 4,368E-03 |
| CPIJ019523 Putative uncharacterized protein                  |                                    | 1,181 | 0,005 | 79,839   | 0,330 | 3,579 | 3,452E-04 |
| CPIJ009744 Putative uncharacterized protein                  | Peroxisomal membrane protein 11C   | 1,182 | 0,002 | 58,868   | 0,303 | 3,906 | 9,392E-05 |
| CPIJ018126 Putative uncharacterized protein                  | Ninjurin-2                         | 1,187 | 0,022 | 30,594   | 0,387 | 3,065 | 2,177E-03 |
| CPIJ011420 Putative uncharacterized protein                  |                                    | 1,188 | 0,202 | 9,475    | 0,621 | 1,913 | 5,579E-02 |
| CPIJ016340 esterase 6 precursor                              |                                    | 1,191 | 0,104 | 13,081   | 0,513 | 2,322 | 2,021E-02 |
| CPIJ008870 protein phosphatase type 2c                       |                                    | 1,192 | 0,132 | 10,754   | 0,543 | 2,196 | 2,807E-02 |
| CPIJ001030 Zinc finger protein 235                           |                                    | 1,195 | 0,130 | 11,634   | 0,543 | 2,202 | 2,763E-02 |
| CPIJ001755 CYP4J19: cytochrome P450 4J19                     |                                    | 1,195 | 0,156 | 10,296   | 0,571 | 2,094 | 3,628E-02 |
| CPIJ006761 Glucose-6-phosphate 1-dehydrogenase               |                                    | 1,203 | 0,001 | 58,483   | 0,303 | 3,971 | 7,170E-05 |
| CPIJ004223 pancreatic triacylglycerol lipase precursor       |                                    | 1,204 | 0,000 | 613,122  | 0,282 | 4,274 | 1,916E-05 |
| CPIJ002070 Putative uncharacterized protein                  |                                    | 1,207 | 0,000 | 5144,590 | 0,194 | 6,208 | 5,359E-10 |
| CPIJ017178 Myoinositol oxygenase                             |                                    | 1,211 | 0,237 | 851,557  | 0,673 | 1,798 | 7,210E-02 |
| CPIJ001050 protease m1 zinc metalloprotease                  |                                    | 1,212 | 0,000 | 829,316  | 0,244 | 4,967 | 6,791E-07 |
| CPIJ014792 Putative uncharacterized protein                  | Myrosinase                         | 1,213 | 0,166 | 8,637    | 0,591 | 2,051 | 4,027E-02 |
| CPIJ006739 dynein light chain, putative                      |                                    | 1,215 | 0,074 | 14,435   | 0,486 | 2,500 | 1,243E-02 |
| CPIJ015126 Putative uncharacterized protein                  |                                    | 1,217 | 0,196 | 8,011    | 0,628 | 1,938 | 5,265E-02 |
| CPIJ018193 Putative uncharacterized protein                  | DAZ-associated protein 2           | 1,217 | 0,062 | 39,237   | 0,470 | 2,590 | 9,599E-03 |
| CPIJ008702 Putative uncharacterized protein                  | Gamma-interferon inducible lysosor | 1,220 | 0,026 | 26,974   | 0,407 | 2,996 | 2,739E-03 |
| CPIJ006498 Goliath E3 ubiquitin ligase                       |                                    | 1,225 | 0,015 | 30,155   | 0,381 | 3,217 | 1,297E-03 |



|                                                    |                                      |       |       |         |       |       |           |
|----------------------------------------------------|--------------------------------------|-------|-------|---------|-------|-------|-----------|
| CPIJ012511 Uncharacterized protein (Fragment)      |                                      | 1,225 | 0,002 | 72,640  | 0,312 | 3,926 | 8,627E-05 |
| CPIJ004547 Lariat debranching enzyme               |                                      | 1,226 | 0,111 | 11,136  | 0,536 | 2,288 | 2,213E-02 |
| CPIJ005692 Putative uncharacterized protein        |                                      | 1,226 | 0,037 | 24,823  | 0,431 | 2,842 | 4,478E-03 |
| CPIJ000498 Putative uncharacterized protein        |                                      | 1,226 | 0,119 | 11,859  | 0,544 | 2,253 | 2,429E-02 |
| CPIJ001239 cathepsin B precursor                   |                                      | 1,227 | 0,075 | 19,015  | 0,491 | 2,499 | 1,245E-02 |
| CPIJ009474 CYP4D40: cytochrome P450 4D40           |                                      | 1,227 | 0,000 | 512,041 | 0,266 | 4,618 | 3,870E-06 |
| CPIJ010480 CYP4J20: cytochrome P450 4J20           |                                      | 1,227 | 0,007 | 46,283  | 0,352 | 3,489 | 4,848E-04 |
| CPIJ019460 Putative uncharacterized protein        | Homeobox domain-containing prote     | 1,236 | 0,201 | 7,576   | 0,644 | 1,919 | 5,502E-02 |
| CPIJ009367 Putative uncharacterized protein        |                                      | 1,238 | 0,003 | 60,585  | 0,329 | 3,761 | 1,695E-04 |
| CPIJ004795 mitochondrial carrier protein, putative |                                      | 1,238 | 0,023 | 25,391  | 0,407 | 3,041 | 2,357E-03 |
| CPIJ015211 imaginal discs arrested, putative       |                                      | 1,238 | 0,187 | 7,702   | 0,628 | 1,973 | 4,855E-02 |
| CPIJ007178 Putative uncharacterized protein        | Peptidase C45 hydrolase domain-co    | 1,241 | 0,022 | 39,729  | 0,406 | 3,058 | 2,227E-03 |
| CPIJ003317 Putative uncharacterized protein        |                                      | 1,241 | 0,000 | 103,080 | 0,274 | 4,530 | 5,887E-06 |
| CPIJ008545 Zinc finger protein 700                 |                                      | 1,242 | 0,197 | 7,934   | 0,642 | 1,935 | 5,299E-02 |
| CPIJ007760 Putative uncharacterized protein        |                                      | 1,243 | 0,065 | 27,222  | 0,484 | 2,567 | 1,026E-02 |
| CPIJ003966 Putative uncharacterized protein        | Chitin-binding type-2 domain-contai  | 1,245 | 0,000 | 362,630 | 0,272 | 4,586 | 4,529E-06 |
| CPIJ018720 Protein kintoun                         |                                      | 1,246 | 0,004 | 254,731 | 0,343 | 3,629 | 2,850E-04 |
| CPIJ003965 Putative uncharacterized protein        | Chitin-binding type-2 domain-contai  | 1,251 | 0,000 | 78,595  | 0,279 | 4,491 | 7,087E-06 |
| CPIJ019593 Putative uncharacterized protein        | CCHC-type domain-containing prot     | 1,253 | 0,005 | 34,830  | 0,349 | 3,586 | 3,361E-04 |
| CPIJ016093 Putative uncharacterized protein        | Osteopetrosis-associated transmemb   | 1,254 | 0,007 | 36,504  | 0,361 | 3,470 | 5,197E-04 |
| CPIJ010024 Putative uncharacterized protein        | F-box domain-containing protein      | 1,254 | 0,075 | 18,834  | 0,503 | 2,492 | 1,269E-02 |
| CPIJ017789 Serine protease                         |                                      | 1,257 | 0,177 | 8,646   | 0,626 | 2,008 | 4,467E-02 |
| CPIJ012752 cysteine synthase                       |                                      | 1,261 | 0,022 | 54,338  | 0,413 | 3,056 | 2,243E-03 |
| CPIJ009131 Serpin B4                               |                                      | 1,262 | 0,040 | 23,505  | 0,449 | 2,807 | 4,999E-03 |
| CPIJ004944 Origin recognition complex subunit 4    |                                      | 1,263 | 0,180 | 6,785   | 0,633 | 1,997 | 4,583E-02 |
| CPIJ004115 DNA repair protein RAD50                |                                      | 1,263 | 0,075 | 13,146  | 0,506 | 2,497 | 1,254E-02 |
| CPIJ011040 Proton-coupled amino acid transporter 1 |                                      | 1,264 | 0,001 | 54,324  | 0,317 | 3,986 | 6,715E-05 |
| CPIJ010231 CYP12F9: cytochrome P450 12F9           |                                      | 1,265 | 0,003 | 74,611  | 0,339 | 3,731 | 1,909E-04 |
| CPIJ008107 Putative uncharacterized protein        | Nose resistant-to-fluoxetine protein | 1,266 | 0,001 | 88,611  | 0,309 | 4,095 | 4,231E-05 |
| CPIJ012364 Abc transporter                         |                                      | 1,266 | 0,033 | 20,048  | 0,437 | 2,895 | 3,790E-03 |
| CPIJ003953 Putative uncharacterized protein        | Chitin-binding type-2 domain-contai  | 1,268 | 0,813 | 26,853  | 2,668 | 0,475 | 6,346E-01 |
| CPIJ005898 Putative uncharacterized protein        | Chitin-binding type-2 domain-contai  | 1,270 | 0,000 | 98,773  | 0,279 | 4,553 | 5,283E-06 |
| CPIJ000425 Short-chain-fatty-acid-CoA ligase       |                                      | 1,270 | 0,104 | 13,750  | 0,547 | 2,320 | 2,037E-02 |
| CPIJ002822 Predicted protein                       |                                      | 1,275 | 0,166 | 7,919   | 0,620 | 2,055 | 3,990E-02 |
| CPIJ014162 BTB/POZ domain containing protein       |                                      | 1,276 | 0,119 | 12,158  | 0,567 | 2,250 | 2,446E-02 |
| CPIJ007685 PDZ domain-containing protein BBG-LP10  |                                      | 1,278 | 0,013 | 27,033  | 0,391 | 3,267 | 1,086E-03 |
| CPIJ006569 Glutaminase                             |                                      | 1,280 | 0,018 | 26,154  | 0,407 | 3,148 | 1,645E-03 |
| CPIJ014226 Cellular retinaldehyde-binding protein  |                                      | 1,281 | 0,000 | 710,404 | 0,215 | 5,950 | 2,680E-09 |

|                                                                              |                                     |       |       |           |       |       |           |
|------------------------------------------------------------------------------|-------------------------------------|-------|-------|-----------|-------|-------|-----------|
| CPIJ008305 Putative uncharacterized protein                                  | C2H2-type domain-containing prote   | 1,283 | 0,159 | 7,068     | 0,617 | 2,081 | 3,739E-02 |
| CPIJ004779 Reticulon/nogo                                                    |                                     | 1,283 | 0,005 | 37,653    | 0,355 | 3,617 | 2,975E-04 |
| CPIJ005632 Ganglioside induced differentiation associated protein            |                                     | 1,284 | 0,002 | 50,379    | 0,335 | 3,829 | 1,285E-04 |
| CPIJ001759 CYP4H40: cytochrome P450 4H40                                     |                                     | 1,285 | 0,000 | 553,988   | 0,261 | 4,930 | 8,203E-07 |
| CPIJ010972 Zinc finger protein                                               |                                     | 1,286 | 0,012 | 58,718    | 0,389 | 3,303 | 9,563E-04 |
| CPIJ006041 Angiopoietin-2                                                    |                                     | 1,287 | 0,031 | 18,470    | 0,442 | 2,915 | 3,561E-03 |
| CPIJ009758 serine/threonine protein kinase, putative                         |                                     | 1,291 | 0,000 | 99,034    | 0,282 | 4,574 | 4,786E-06 |
| CPIJ003373 Predicted protein                                                 |                                     | 1,292 | 0,001 | 86,606    | 0,322 | 4,012 | 6,023E-05 |
| CPIJ000348 pregnancy zone protein precursor                                  |                                     | 1,294 | 0,226 | 163,255   | 0,706 | 1,833 | 6,674E-02 |
| CPIJ007313 Myotubularin                                                      |                                     | 1,295 | 0,002 | 57,408    | 0,340 | 3,815 | 1,362E-04 |
| CPIJ002959 sterol O-acyltransferase 2                                        |                                     | 1,299 | 0,055 | 25,738    | 0,490 | 2,653 | 7,988E-03 |
| CPIJ007652 synaptic vesicle protein, putative                                |                                     | 1,300 | 0,041 | 27,521    | 0,465 | 2,796 | 5,168E-03 |
| CPIJ017192 Putative uncharacterized protein                                  |                                     | 1,302 | 0,001 | 68,152    | 0,325 | 4,003 | 6,259E-05 |
| CPIJ010052 Ankyrin repeat domain-containing protein 44                       |                                     | 1,304 | 0,011 | 42,364    | 0,391 | 3,339 | 8,396E-04 |
| CPIJ012036 aminopeptidase N precursor                                        |                                     | 1,306 | 0,000 | 501,398   | 0,263 | 4,963 | 6,939E-07 |
| CPIJ012204 alpha-glucosidase precursor                                       |                                     | 1,307 | 0,000 | 147,717   | 0,253 | 5,158 | 2,499E-07 |
| CPIJ013377 Sorbitol dehydrogenase                                            |                                     | 1,308 | 0,200 | 419,289   | 0,680 | 1,923 | 5,448E-02 |
| CPIJ000192 Putative uncharacterized protein                                  |                                     | 1,311 | 0,091 | 11,861    | 0,547 | 2,398 | 1,650E-02 |
| CPIJ003342 Ceramide kinase                                                   |                                     | 1,311 | 0,000 | 207,265   | 0,239 | 5,484 | 4,158E-08 |
| CPIJ000426 Acetyl-coenzyme A synthetase                                      |                                     | 1,314 | 0,000 | 76,036    | 0,302 | 4,352 | 1,349E-05 |
| CPIJ000906 tetraspanin, putative                                             |                                     | 1,317 | 0,000 | 258,576   | 0,286 | 4,602 | 4,177E-06 |
| CPIJ014208 Monocarboxylate transporter                                       |                                     | 1,319 | 0,000 | 131,534   | 0,239 | 5,529 | 3,225E-08 |
| CPIJ003376 CYP6BY4: cytochrome P450 6BY4                                     |                                     | 1,321 | 0,024 | 38,303    | 0,437 | 3,024 | 2,496E-03 |
| CPIJ003259 Tubulin beta-2C chain                                             |                                     | 1,323 | 0,018 | 21,527    | 0,422 | 3,139 | 1,694E-03 |
| CPIJ008531 lactase-phlorizin hydrolase precursor                             |                                     | 1,328 | 0,000 | 1379,893  | 0,249 | 5,341 | 9,227E-08 |
| CPIJ007825 para-nitrobenzyl esterase                                         |                                     | 1,328 | 0,107 | 21,366    | 0,576 | 2,304 | 2,121E-02 |
| CPIJ000488 Putative uncharacterized protein                                  |                                     | 1,330 | 0,000 | 12055,173 | 0,133 | 9,963 | 2,204E-23 |
| CPIJ006349 Scaffold protein salvador                                         |                                     | 1,333 | 0,098 | 10,590    | 0,565 | 2,359 | 1,834E-02 |
| CPIJ005848 Putative uncharacterized protein                                  | PD-(D/E)XK endonuclease-like don    | 1,335 | 0,104 | 9,048     | 0,576 | 2,320 | 2,036E-02 |
| CPIJ008308 Putative uncharacterized protein                                  | Aprataxin and PNK-like factor PBZ   | 1,338 | 0,003 | 34,614    | 0,357 | 3,743 | 1,816E-04 |
| CPIJ001041 chitoooligosaccharidolytic beta-N-acetylglucosaminidase precursor |                                     | 1,338 | 0,000 | 69,291    | 0,302 | 4,426 | 9,587E-06 |
| CPIJ002823 Putative uncharacterized protein                                  | C2H2-type domain-containing prote   | 1,340 | 0,097 | 9,233     | 0,567 | 2,363 | 1,811E-02 |
| CPIJ000164 Putative uncharacterized protein                                  |                                     | 1,340 | 0,198 | 5,317     | 0,693 | 1,933 | 5,320E-02 |
| CPIJ012329 Zinc finger and SCAN domain-containing protein 5                  |                                     | 1,342 | 0,138 | 7,896     | 0,619 | 2,169 | 3,007E-02 |
| CPIJ004324 Gram-negative bacteria binding protein                            |                                     | 1,342 | 0,000 | 627,717   | 0,268 | 5,011 | 5,405E-07 |
| CPIJ014224 Putative uncharacterized protein                                  | CRAL-TRIO domain-containing prc     | 1,343 | 0,010 | 96,415    | 0,399 | 3,369 | 7,558E-04 |
| CPIJ008379 Putative uncharacterized protein                                  | Metallothionein                     | 1,345 | 0,001 | 541,353   | 0,330 | 4,072 | 4,660E-05 |
| CPIJ008557 Putative uncharacterized protein                                  | Chitin-binding type-2 domain-contai | 1,351 | 0,000 | 95,376    | 0,288 | 4,694 | 2,677E-06 |

|                                                                       |                                      |       |       |         |       |       |           |
|-----------------------------------------------------------------------|--------------------------------------|-------|-------|---------|-------|-------|-----------|
| CPIJ018314 SALAPY1: salivary apyrase                                  |                                      | 1,351 | 0,000 | 274,738 | 0,259 | 5,216 | 1,830E-07 |
| CPIJ012933 MIT domain-containing protein 1                            |                                      | 1,352 | 0,101 | 8,896   | 0,578 | 2,338 | 1,938E-02 |
| CPIJ012596 Zinc finger protein 28                                     |                                      | 1,355 | 0,084 | 10,317  | 0,556 | 2,438 | 1,475E-02 |
| CPIJ003186 Gamma-glutamyl transpeptidase                              |                                      | 1,357 | 0,062 | 12,577  | 0,524 | 2,590 | 9,602E-03 |
| CPIJ006248 D-arabinose 1-dehydrogenase                                |                                      | 1,360 | 0,005 | 41,366  | 0,377 | 3,604 | 3,134E-04 |
| CPIJ006409 Alanine-glyoxylate aminotransferase                        |                                      | 1,361 | 0,006 | 111,307 | 0,384 | 3,541 | 3,980E-04 |
| CPIJ000611 Sulfate transporter 1.2                                    |                                      | 1,368 | 0,039 | 15,998  | 0,485 | 2,819 | 4,821E-03 |
| CPIJ000032 Glucosyl/glucuronosyl transferase                          |                                      | 1,374 | 0,000 | 74,715  | 0,322 | 4,267 | 1,984E-05 |
| CPIJ016520 Suppressor of defective silencing                          |                                      | 1,375 | 0,098 | 8,422   | 0,583 | 2,357 | 1,844E-02 |
| CPIJ006939 Putative uncharacterized protein                           |                                      | 1,375 | 0,014 | 24,732  | 0,425 | 3,236 | 1,214E-03 |
| CPIJ015110 Synaptic vesicle protein                                   |                                      | 1,375 | 0,118 | 10,886  | 0,609 | 2,257 | 2,398E-02 |
| CPIJ005161 DNA ligase 4                                               |                                      | 1,377 | 0,080 | 10,020  | 0,560 | 2,460 | 1,389E-02 |
| CPIJ018313 protein 5NUC precursor                                     |                                      | 1,378 | 0,000 | 112,204 | 0,304 | 4,528 | 5,941E-06 |
| CPIJ006731 numb-associated kinase, putative                           |                                      | 1,383 | 0,042 | 15,844  | 0,497 | 2,781 | 5,421E-03 |
| CPIJ008944 Sugar transporter                                          |                                      | 1,386 | 0,019 | 31,496  | 0,443 | 3,125 | 1,777E-03 |
| CPIJ009746 Putative uncharacterized protein                           | CRAL-TRIO domain-containing prc      | 1,388 | 0,045 | 12,681  | 0,506 | 2,743 | 6,085E-03 |
| CPIJ020294 Putative uncharacterized protein                           |                                      | 1,389 | 0,015 | 20,376  | 0,433 | 3,208 | 1,337E-03 |
| CPIJ019182 Ribonuclease UK114                                         |                                      | 1,392 | 0,037 | 18,919  | 0,491 | 2,835 | 4,582E-03 |
| CPIJ011382 chymotrypsin 1 precursor                                   |                                      | 1,396 | 0,008 | 31,109  | 0,408 | 3,423 | 6,198E-04 |
| CPIJ013275 PsqA                                                       |                                      | 1,399 | 0,121 | 10,110  | 0,624 | 2,240 | 2,507E-02 |
| CPIJ003876 Putative uncharacterized protein                           | Cyclin-dependent kinase inhibitor d  | 1,400 | 0,151 | 6,826   | 0,662 | 2,116 | 3,432E-02 |
| CPIJ005734 Putative uncharacterized protein                           |                                      | 1,402 | 0,098 | 8,276   | 0,596 | 2,354 | 1,859E-02 |
| CPIJ020221 ferritin subunit, putative                                 |                                      | 1,405 | 0,131 | 6,812   | 0,639 | 2,199 | 2,785E-02 |
| CPIJ003868 Putative uncharacterized protein                           |                                      | 1,405 | 0,036 | 21,114  | 0,492 | 2,857 | 4,283E-03 |
| CPIJ008109 Putative uncharacterized protein                           | Nose resistant-to-fluoxetine protein | 1,410 | 0,000 | 147,121 | 0,261 | 5,405 | 6,486E-08 |
| CPIJ002864 Tryptophan 2,3-dioxygenase                                 |                                      | 1,411 | 0,015 | 29,875  | 0,440 | 3,205 | 1,349E-03 |
| CPIJ011985 Putative uncharacterized protein                           | Solute carrier family 66 member 3    | 1,414 | 0,054 | 12,369  | 0,532 | 2,657 | 7,887E-03 |
| CPIJ015482 Putative uncharacterized protein                           |                                      | 1,414 | 0,183 | 4,971   | 0,712 | 1,986 | 4,700E-02 |
| CPIJ003583 Putative uncharacterized protein                           | Arrestin C-terminal-like domain-cor  | 1,416 | 0,000 | 343,445 | 0,241 | 5,885 | 3,977E-09 |
| CPIJ010004 DNA topoisomerase 2-binding protein 1                      |                                      | 1,418 | 0,135 | 6,312   | 0,650 | 2,179 | 2,930E-02 |
| CPIJ005958 CYP6AA8: cytochrome P450 6AA8                              |                                      | 1,425 | 0,000 | 252,853 | 0,262 | 5,430 | 5,635E-08 |
| CPIJ001742 Zinc carboxypeptidase                                      |                                      | 1,428 | 0,000 | 422,215 | 0,322 | 4,431 | 9,381E-06 |
| CPIJ003304 Isocitrate dehydrogenase [NADP]                            |                                      | 1,429 | 0,000 | 989,049 | 0,242 | 5,901 | 3,614E-09 |
| CPIJ016224 anionic trypsin-2 precursor                                |                                      | 1,429 | 0,050 | 14,405  | 0,530 | 2,697 | 7,004E-03 |
| CPIJ007505 bumetanide-sensitive Na-K-Cl cotransport protein, putative |                                      | 1,430 | 0,000 | 141,833 | 0,301 | 4,746 | 2,076E-06 |
| CPIJ012074 three prime repair exonuclease 1, putative                 |                                      | 1,432 | 0,105 | 9,066   | 0,618 | 2,315 | 2,059E-02 |
| CPIJ011026 dehydrogenase/reductase SDR family member 7 precursor      |                                      | 1,433 | 0,000 | 55,351  | 0,303 | 4,729 | 2,258E-06 |
| CPIJ001189 Putative uncharacterized protein                           | C3H1-type domain-containing prote    | 1,437 | 0,074 | 10,760  | 0,574 | 2,502 | 1,234E-02 |

|                                                       |                                     |       |       |         |       |       |           |
|-------------------------------------------------------|-------------------------------------|-------|-------|---------|-------|-------|-----------|
| CPIJ015858 Uncharacterized protein (Fragment)         |                                     | 1,442 | 0,063 | 9,739   | 0,558 | 2,583 | 9,781E-03 |
| CPIJ003521 Putative uncharacterized protein           | C2H2-type domain-containing prote   | 1,450 | 0,009 | 21,261  | 0,426 | 3,408 | 6,556E-04 |
| CPIJ005957 CYP6AA9: cytochrome P450 6AA9              |                                     | 1,450 | 0,000 | 278,440 | 0,232 | 6,252 | 4,063E-10 |
| CPIJ012198 Origin recognition complex subunit         |                                     | 1,457 | 0,133 | 6,320   | 0,666 | 2,189 | 2,861E-02 |
| CPIJ002173 Putative uncharacterized protein           |                                     | 1,462 | 0,042 | 11,633  | 0,526 | 2,779 | 5,448E-03 |
| CPIJ007911 Putative uncharacterized protein           | Chitin-binding type-2 domain-contai | 1,464 | 0,699 | 117,913 | 2,007 | 0,729 | 4,657E-01 |
| CPIJ010068 ATP-binding cassette sub-family A member 7 |                                     | 1,467 | 0,000 | 473,955 | 0,237 | 6,200 | 5,652E-10 |
| CPIJ003384 deoxyribonuclease I, putative              |                                     | 1,474 | 0,001 | 57,040  | 0,359 | 4,101 | 4,119E-05 |
| CPIJ020053 glutathione transferase AtGST, putative    |                                     | 1,476 | 0,003 | 98,163  | 0,390 | 3,783 | 1,547E-04 |
| CPIJ013017 Apoptosis stimulating of P53               |                                     | 1,479 | 0,064 | 9,350   | 0,575 | 2,573 | 1,007E-02 |
| CPIJ010138 zinc carboxypeptidase A 1 precursor        |                                     | 1,479 | 0,000 | 93,700  | 0,344 | 4,303 | 1,686E-05 |
| CPIJ009107 Angiotensin-converting enzyme              |                                     | 1,480 | 0,011 | 26,682  | 0,446 | 3,321 | 8,984E-04 |
| CPIJ019291 serine protease htra2, putative            |                                     | 1,480 | 0,101 | 7,189   | 0,633 | 2,340 | 1,930E-02 |
| CPIJ009976 Putative uncharacterized protein           | Mannose-6-phosphate receptor dom    | 1,486 | 0,011 | 18,455  | 0,446 | 3,327 | 8,765E-04 |
| CPIJ017721 gamma-glutamyltranspeptidase precursor     |                                     | 1,498 | 0,035 | 14,859  | 0,522 | 2,868 | 4,131E-03 |
| CPIJ004238 Mitochondrial brown fat uncoupling protein |                                     | 1,498 | 0,009 | 30,962  | 0,440 | 3,402 | 6,698E-04 |
| CPIJ012948 Putative uncharacterized protein           | DH domain-containing protein        | 1,500 | 0,000 | 220,234 | 0,274 | 5,465 | 4,620E-08 |
| CPIJ013626 Putative uncharacterized protein           | Chitin-binding type-2 domain-contai | 1,503 | 0,655 | 16,900  | 1,800 | 0,835 | 4,038E-01 |
| CPIJ019751 CYP6AG16: cytochrome P450 6AG16            |                                     | 1,504 | 0,074 | 9,067   | 0,601 | 2,504 | 1,228E-02 |
| CPIJ009756 DNA topoisomerase 3-beta                   |                                     | 1,510 | 0,000 | 139,648 | 0,317 | 4,757 | 1,963E-06 |
| CPIJ003603 Putative uncharacterized protein           | AN1-type domain-containing protei   | 1,515 | 0,005 | 21,890  | 0,426 | 3,560 | 3,711E-04 |
| CPIJ013278 Putative uncharacterized protein           | Farnesoic acid O-methyl transferase | 1,516 | 0,121 | 430,605 | 0,676 | 2,242 | 2,496E-02 |
| CPIJ002050 Homeobox protein                           |                                     | 1,517 | 0,001 | 43,486  | 0,370 | 4,098 | 4,162E-05 |
| CPIJ013304 Putative uncharacterized protein           | F-box domain-containing protein     | 1,523 | 0,057 | 9,418   | 0,579 | 2,629 | 8,555E-03 |
| CPIJ000037 UDP-glucuronosyltransferase 2B20 precursor |                                     | 1,527 | 0,000 | 149,324 | 0,300 | 5,086 | 3,655E-07 |
| CPIJ002744 Putative uncharacterized protein           | MD-2-related lipid-recognition dom  | 1,527 | 0,003 | 91,343  | 0,412 | 3,710 | 2,073E-04 |
| CPIJ019360 Predicted protein                          |                                     | 1,527 | 0,051 | 10,560  | 0,570 | 2,681 | 7,338E-03 |
| CPIJ010259 voltage and ligand gated potassium channel |                                     | 1,530 | 0,001 | 34,119  | 0,365 | 4,189 | 2,803E-05 |
| CPIJ004323 Gram-negative bacteria binding protein     |                                     | 1,530 | 0,001 | 74,311  | 0,372 | 4,110 | 3,955E-05 |
| CPIJ012833 ficolin-1 precursor                        |                                     | 1,532 | 0,101 | 13,070  | 0,655 | 2,340 | 1,928E-02 |
| CPIJ013224 Putative uncharacterized protein           | Adipose-secreted signaling protein  | 1,535 | 0,000 | 87,004  | 0,308 | 4,981 | 6,310E-07 |
| CPIJ015854 Putative uncharacterized protein           |                                     | 1,554 | 0,024 | 15,999  | 0,513 | 3,033 | 2,421E-03 |
| CPIJ012035 Putative uncharacterized protein           |                                     | 1,555 | 0,064 | 9,656   | 0,605 | 2,571 | 1,014E-02 |
| CPIJ012250 Troponin C                                 |                                     | 1,558 | 0,011 | 17,149  | 0,469 | 3,323 | 8,897E-04 |
| CPIJ003589 Putative uncharacterized protein           | Ubiquitin-like domain-containing pr | 1,568 | 0,000 | 743,697 | 0,256 | 6,129 | 8,845E-10 |
| CPIJ003958 Putative uncharacterized protein           | Chitin-binding type-2 domain-contai | 1,568 | 0,000 | 520,104 | 0,304 | 5,163 | 2,424E-07 |
| CPIJ003392 morphine 6-dehydrogenase .                 |                                     | 1,569 | 0,544 | 8,157   | 1,481 | 1,059 | 2,896E-01 |
| CPIJ018848 Mitochondrial protein import protein MAS5  |                                     | 1,584 | 0,000 | 62,431  | 0,342 | 4,634 | 3,579E-06 |

|                                                                     |                                   |       |       |          |       |       |           |
|---------------------------------------------------------------------|-----------------------------------|-------|-------|----------|-------|-------|-----------|
| CPIJ018192 Putative uncharacterized protein                         | ADP/ATP translocase               | 1,592 | 0,000 | 182,995  | 0,237 | 6,704 | 2,029E-11 |
| CPIJ003183 N(4)-(Beta-N-acetylglucosaminy)-L-asparaginase precursor |                                   | 1,594 | 0,059 | 8,100    | 0,610 | 2,612 | 8,996E-03 |
| CPIJ001764 chorion peroxidase precursor                             |                                   | 1,596 | 0,033 | 15,345   | 0,552 | 2,892 | 3,832E-03 |
| CPIJ002236 Putative uncharacterized protein                         | Q rich salivary secreted protein  | 1,600 | 0,032 | 20,613   | 0,551 | 2,902 | 3,709E-03 |
| CPIJ006721 CYP4H37: cytochrome P450 4H37                            |                                   | 1,603 | 0,000 | 277,629  | 0,265 | 6,045 | 1,491E-09 |
| CPIJ000627 Putative uncharacterized protein                         | C2H2-type domain-containing prote | 1,623 | 0,049 | 9,937    | 0,598 | 2,713 | 6,677E-03 |
| CPIJ010681 Coiled-coil domain-containing protein 22 homolog         |                                   | 1,624 | 0,005 | 19,917   | 0,454 | 3,578 | 3,457E-04 |
| CPIJ013414 Nucleolar protein c7b                                    |                                   | 1,633 | 0,000 | 52,861   | 0,338 | 4,829 | 1,371E-06 |
| CPIJ003305 NAD(P) transhydrogenase, mitochondrial precursor         |                                   | 1,634 | 0,000 | 1553,460 | 0,286 | 5,724 | 1,043E-08 |
| CPIJ011584 Putative uncharacterized protein                         |                                   | 1,642 | 0,003 | 22,495   | 0,443 | 3,708 | 2,089E-04 |
| CPIJ016534 Putative uncharacterized protein                         |                                   | 1,647 | 0,030 | 12,465   | 0,563 | 2,926 | 3,438E-03 |
| CPIJ001938 BTG1 protein                                             |                                   | 1,651 | 0,043 | 9,415    | 0,598 | 2,761 | 5,758E-03 |
| CPIJ020056 Cysteine dioxygenase                                     |                                   | 1,652 | 0,000 | 45,523   | 0,351 | 4,710 | 2,482E-06 |
| CPIJ020229 CYP4D42: cytochrome P450 4D42                            |                                   | 1,653 | 0,001 | 28,908   | 0,402 | 4,112 | 3,925E-05 |
| CPIJ003787 Putative uncharacterized protein                         | Protein with signal anchor        | 1,656 | 0,085 | 95,904   | 0,681 | 2,431 | 1,506E-02 |
| CPIJ012013 serine protease inhibitor, serpin                        |                                   | 1,662 | 0,065 | 10,728   | 0,647 | 2,567 | 1,025E-02 |
| CPIJ004320 gram-negative bacteria-binding protein 1 precursor       |                                   | 1,663 | 0,170 | 84,782   | 0,817 | 2,035 | 4,187E-02 |
| CPIJ005697 n-acetylgalactosaminyltransferase                        |                                   | 1,665 | 0,000 | 50,780   | 0,314 | 5,294 | 1,195E-07 |
| CPIJ000415 Phosphatidyltransferase                                  |                                   | 1,665 | 0,001 | 32,731   | 0,399 | 4,172 | 3,023E-05 |
| CPIJ000230 Putative uncharacterized protein                         | tRNA-splicing endonuclease subuni | 1,666 | 0,059 | 7,008    | 0,636 | 2,618 | 8,853E-03 |
| CPIJ006497 Putative uncharacterized protein                         | RING-type domain-containing prote | 1,670 | 0,007 | 16,741   | 0,479 | 3,487 | 4,881E-04 |
| CPIJ000007 Chitinase                                                |                                   | 1,674 | 0,007 | 23,667   | 0,485 | 3,454 | 5,529E-04 |
| CPIJ008523 serine-type enodpeptidase, putative                      |                                   | 1,674 | 0,009 | 19,279   | 0,494 | 3,388 | 7,033E-04 |
| CPIJ003524 Annulin                                                  |                                   | 1,678 | 0,049 | 7,705    | 0,620 | 2,706 | 6,809E-03 |
| CPIJ007828 bile salt-activated lipase precursor                     |                                   | 1,687 | 0,026 | 11,056   | 0,565 | 2,986 | 2,830E-03 |
| CPIJ012677 Sugar transporter                                        |                                   | 1,687 | 0,076 | 6,109    | 0,678 | 2,487 | 1,288E-02 |
| CPIJ006606 Molybdopterin cofactor synthesis protein a               |                                   | 1,688 | 0,000 | 160,846  | 0,264 | 6,392 | 1,635E-10 |
| CPIJ013381 Sorbitol dehydrogenase                                   |                                   | 1,688 | 0,015 | 15,748   | 0,527 | 3,201 | 1,368E-03 |
| CPIJ008074 glucosamine-6-phosphate isomerase                        |                                   | 1,688 | 0,000 | 35,097   | 0,376 | 4,491 | 7,100E-06 |
| CPIJ005956 CYP6BZ2: cytochrome P450 6BZ2                            |                                   | 1,694 | 0,000 | 686,620  | 0,245 | 6,915 | 4,673E-12 |
| CPIJ000147 Putative uncharacterized protein                         | PDZ domain-containing protein     | 1,696 | 0,043 | 11,480   | 0,613 | 2,769 | 5,627E-03 |
| CPIJ010345 Putative uncharacterized protein                         |                                   | 1,696 | 0,020 | 11,961   | 0,549 | 3,090 | 1,999E-03 |
| CPIJ010806 Putative uncharacterized protein                         | Peptidase M14 carboxypeptidase A  | 1,700 | 0,010 | 21,278   | 0,507 | 3,351 | 8,039E-04 |
| CPIJ001265 Alkaline phosphatase                                     |                                   | 1,702 | 0,000 | 523,241  | 0,275 | 6,191 | 5,972E-10 |
| CPIJ000988 Sugar transporter                                        |                                   | 1,713 | 0,027 | 9,179    | 0,575 | 2,977 | 2,911E-03 |
| CPIJ008283 Multidrug resistance protein 2                           |                                   | 1,713 | 0,045 | 7,788    | 0,624 | 2,746 | 6,033E-03 |
| CPIJ001560 calcium-binding protein, putative                        |                                   | 1,718 | 0,283 | 25,353   | 1,031 | 1,666 | 9,565E-02 |
| CPIJ002138 chymotrypsinogen, putative                               |                                   | 1,722 | 0,000 | 27,018   | 0,402 | 4,277 | 1,891E-05 |

|                                                  |                                      |       |       |         |       |       |           |
|--------------------------------------------------|--------------------------------------|-------|-------|---------|-------|-------|-----------|
| CPIJ007204 apolipoporphins precursor             |                                      | 1,726 | 0,042 | 16,974  | 0,621 | 2,780 | 5,430E-03 |
| CPIJ015813 Putative uncharacterized protein      | chloroplast protein-transporting AT1 | 1,727 | 0,004 | 18,894  | 0,473 | 3,651 | 2,608E-04 |
| CPIJ013511 Putative uncharacterized protein      |                                      | 1,729 | 0,043 | 8,930   | 0,626 | 2,762 | 5,742E-03 |
| CPIJ007910 Putative uncharacterized protein      | Chitin-binding type-2 domain-contai  | 1,733 | 0,608 | 42,458  | 1,874 | 0,925 | 3,551E-01 |
| CPIJ015670 4-coumarate-CoA ligase 3              |                                      | 1,733 | 0,012 | 15,723  | 0,528 | 3,285 | 1,020E-03 |
| CPIJ002818 Putative uncharacterized protein      | Chitin-binding type-2 domain-contai  | 1,741 | 0,473 | 15,628  | 1,435 | 1,213 | 2,252E-01 |
| CPIJ011298 Brachyurin                            |                                      | 1,743 | 0,003 | 28,897  | 0,462 | 3,774 | 1,605E-04 |
| CPIJ002025 Putative uncharacterized protein      | FYVE-type domain-containing prote    | 1,752 | 0,000 | 33,961  | 0,366 | 4,789 | 1,674E-06 |
| CPIJ016854 CYP6N22: cytochrome P450 6N22         |                                      | 1,761 | 0,000 | 34,627  | 0,390 | 4,514 | 6,363E-06 |
| CPIJ017122 Putative uncharacterized protein      | Superoxide dismutase copper/zinc b   | 1,763 | 0,015 | 14,169  | 0,549 | 3,211 | 1,320E-03 |
| CPIJ016551 Caspase-1                             |                                      | 1,770 | 0,000 | 33,876  | 0,365 | 4,851 | 1,227E-06 |
| CPIJ013879 DNA polymerase theta                  |                                      | 1,771 | 0,003 | 18,113  | 0,470 | 3,771 | 1,625E-04 |
| CPIJ002628 sensory appendage protein, putative   |                                      | 1,781 | 0,050 | 8,833   | 0,661 | 2,694 | 7,060E-03 |
| CPIJ017014 CYP6AG14: cytochrome P450 6AG14       |                                      | 1,785 | 0,000 | 54,280  | 0,315 | 5,673 | 1,406E-08 |
| CPIJ019446 copper transport protein              |                                      | 1,789 | 0,011 | 15,339  | 0,536 | 3,338 | 8,451E-04 |
| CPIJ002659 Transmembrane protease                |                                      | 1,793 | 0,085 | 4,829   | 0,737 | 2,433 | 1,499E-02 |
| CPIJ005655 Oxidoreductase                        |                                      | 1,803 | 0,000 | 48,115  | 0,337 | 5,344 | 9,083E-08 |
| CPIJ006210 FK506-binding protein 6               |                                      | 1,806 | 0,074 | 5,215   | 0,722 | 2,503 | 1,232E-02 |
| CPIJ008530 lactase-phlorizin hydrolase precursor |                                      | 1,807 | 0,054 | 123,593 | 0,679 | 2,661 | 7,794E-03 |
| CPIJ016094 Putative uncharacterized protein      | Osteopetrosis-associated transmembr  | 1,813 | 0,000 | 40,260  | 0,382 | 4,749 | 2,041E-06 |
| CPIJ002867 AMP dependent coa ligase, putative    |                                      | 1,818 | 0,039 | 236,655 | 0,647 | 2,812 | 4,929E-03 |
| CPIJ000039 glucosyl/glucuronosyl transferases    |                                      | 1,821 | 0,000 | 248,829 | 0,249 | 7,308 | 2,710E-13 |
| CPIJ010173 Testis-specific protein pbs13         |                                      | 1,821 | 0,000 | 67,501  | 0,357 | 5,105 | 3,304E-07 |
| CPIJ011550 tubulin alpha-2 chain                 |                                      | 1,833 | 0,015 | 14,359  | 0,572 | 3,206 | 1,344E-03 |
| CPIJ000133 Putative uncharacterized protein      | LIM zinc-binding domain-containin    | 1,834 | 0,027 | 7,944   | 0,619 | 2,965 | 3,024E-03 |
| CPIJ013510 Putative uncharacterized protein      |                                      | 1,839 | 0,413 | 46,387  | 1,358 | 1,354 | 1,756E-01 |
| CPIJ011198 Threonine dehydratase/deaminase       |                                      | 1,840 | 0,445 | 67,951  | 1,442 | 1,277 | 2,018E-01 |
| CPIJ000146 superoxide dismutase 2                |                                      | 1,866 | 0,062 | 6,652   | 0,721 | 2,587 | 9,679E-03 |
| CPIJ039829 Aminopeptidase                        |                                      | 1,869 | 0,043 | 413,244 | 0,676 | 2,763 | 5,728E-03 |
| CPIJ018794 Putative uncharacterized protein      | 14.5 kDa salivary protein            | 1,887 | 0,007 | 12,409  | 0,546 | 3,455 | 5,496E-04 |
| CPIJ016147 Predicted protein                     |                                      | 1,889 | 0,045 | 6,826   | 0,687 | 2,750 | 5,968E-03 |
| CPIJ013341 Putative uncharacterized protein      |                                      | 1,911 | 0,000 | 28,828  | 0,401 | 4,767 | 1,874E-06 |
| CPIJ004556 Putative uncharacterized protein      | E3 ubiquitin-protein ligase KCMF1    | 1,914 | 0,000 | 35,428  | 0,374 | 5,116 | 3,113E-07 |
| CPIJ016736 cysteine-rich venom protein, putative |                                      | 1,920 | 0,020 | 14,983  | 0,620 | 3,099 | 1,943E-03 |
| CPIJ018355 smad, putative                        |                                      | 1,929 | 0,018 | 8,947   | 0,615 | 3,137 | 1,710E-03 |
| CPIJ006075 trypsin beta precursor                |                                      | 1,930 | 0,000 | 114,758 | 0,351 | 5,491 | 3,991E-08 |
| CPIJ001859 Sodium/solute symporter               |                                      | 1,932 | 0,009 | 11,112  | 0,567 | 3,407 | 6,558E-04 |
| CPIJ009407 Putative uncharacterized protein      | Chitin-binding type-2 domain-contai  | 1,932 | 0,310 | 85,923  | 1,211 | 1,596 | 1,106E-01 |



|                                                          |                                        |       |       |         |       |       |           |
|----------------------------------------------------------|----------------------------------------|-------|-------|---------|-------|-------|-----------|
| CPIJ006267 LRIM16: leucine-rich immune protein (TM)      |                                        | 1,949 | 0,000 | 37,562  | 0,366 | 5,320 | 1,035E-07 |
| CPIJ002680 Glutathione S-transferase                     |                                        | 1,952 | 0,005 | 12,835  | 0,546 | 3,576 | 3,491E-04 |
| CPIJ020318 Putative uncharacterized protein              | BZIP domain-containing protein         | 1,968 | 0,027 | 9,201   | 0,661 | 2,978 | 2,900E-03 |
| CPIJ003372 Putative uncharacterized protein              |                                        | 1,978 | 0,050 | 5,471   | 0,734 | 2,696 | 7,011E-03 |
| CPIJ015654 lysosomal alpha-mannosidase                   |                                        | 1,978 | 0,000 | 54,024  | 0,408 | 4,844 | 1,273E-06 |
| CPIJ010548 CYP9J39: cytochrome P450 9J39                 |                                        | 1,991 | 0,002 | 18,676  | 0,521 | 3,820 | 1,332E-04 |
| CPIJ018465 Putative uncharacterized protein              | Chitin-binding type-2 domain-contai    | 1,993 | 0,610 | 70,653  | 2,163 | 0,921 | 3,569E-01 |
| CPIJ005332 CYP9J43: cytochrome P450 9J43                 |                                        | 1,994 | 0,085 | 45,016  | 0,819 | 2,434 | 1,492E-02 |
| CPIJ011267 Putative uncharacterized protein              |                                        | 2,002 | 0,042 | 5,705   | 0,721 | 2,775 | 5,517E-03 |
| CPIJ011185 deoxyribonuclease I, putative                 |                                        | 2,016 | 0,000 | 112,239 | 0,315 | 6,400 | 1,558E-10 |
| CPIJ017156 Ankyrin repeat and SOCS box protein 13        |                                        | 2,018 | 0,000 | 20,093  | 0,451 | 4,469 | 7,844E-06 |
| CPIJ011427 Putative uncharacterized protein              | U2A'/phosphoprotein 32 family A C      | 2,022 | 0,003 | 12,982  | 0,545 | 3,709 | 2,083E-04 |
| CPIJ008946 Sugar transporter                             |                                        | 2,057 | 0,017 | 8,624   | 0,651 | 3,162 | 1,569E-03 |
| CPIJ002235 Putative uncharacterized protein              |                                        | 2,059 | 0,337 | 41,451  | 1,347 | 1,529 | 1,263E-01 |
| CPIJ004718 Putative uncharacterized protein              | C2H2-type domain-containing prote      | 2,059 | 0,024 | 6,473   | 0,679 | 3,034 | 2,412E-03 |
| CPIJ004411 CYP6Z12: cytochrome P450 6Z12                 |                                        | 2,065 | 0,000 | 260,634 | 0,305 | 6,766 | 1,323E-11 |
| CPIJ009347 Zinc finger protein 394                       |                                        | 2,073 | 0,062 | 4,427   | 0,801 | 2,588 | 9,642E-03 |
| CPIJ003315 Putative uncharacterized protein              | THAP-type domain-containing prote      | 2,073 | 0,062 | 4,427   | 0,801 | 2,588 | 9,642E-03 |
| CPIJ004570 Putative uncharacterized protein              | Oxidative stress-responsive serine-tri | 2,083 | 0,023 | 6,197   | 0,686 | 3,038 | 2,383E-03 |
| CPIJ007903 peritrophin-1 precursor                       |                                        | 2,094 | 0,478 | 29,101  | 1,740 | 1,203 | 2,289E-01 |
| CPIJ005492 Putative uncharacterized protein              | Sushi domain-containing protein        | 2,102 | 0,000 | 139,574 | 0,260 | 8,101 | 5,460E-16 |
| CPIJ001757 CYP4H39: cytochrome P450 4H39                 |                                        | 2,108 | 0,000 | 123,671 | 0,266 | 7,911 | 2,548E-15 |
| CPIJ005777 synaptic vesicle protein, putative            |                                        | 2,108 | 0,201 | 15,756  | 1,098 | 1,920 | 5,492E-02 |
| CPIJ011346 Notch                                         |                                        | 2,113 | 0,000 | 16,674  | 0,494 | 4,278 | 1,889E-05 |
| CPIJ010541 CYP9J37: cytochrome P450 9J37                 |                                        | 2,120 | 0,000 | 535,261 | 0,275 | 7,716 | 1,202E-14 |
| CPIJ012944 fad nad binding oxidoreductases               |                                        | 2,150 | 0,026 | 6,812   | 0,718 | 2,996 | 2,734E-03 |
| CPIJ008555 Uncharacterized protein (Fragment)            |                                        | 2,160 | 0,009 | 9,398   | 0,638 | 3,385 | 7,109E-04 |
| CPIJ007899 Putative uncharacterized protein              | Chitin-binding type-2 domain-contai    | 2,182 | 0,550 | 55,516  | 2,094 | 1,042 | 2,973E-01 |
| CPIJ004230 Lipase                                        |                                        | 2,202 | 0,000 | 139,561 | 0,345 | 6,376 | 1,816E-10 |
| CPIJ015980 Putative uncharacterized protein              | Chitin-binding type-2 domain-contai    | 2,210 | 0,109 | 288,371 | 0,964 | 2,294 | 2,179E-02 |
| CPIJ008498 Putative uncharacterized protein              | Chitin-binding type-2 domain-contai    | 2,212 | 0,479 | 35,017  | 1,842 | 1,201 | 2,298E-01 |
| CPIJ011772 Homeobox protein                              |                                        | 2,235 | 0,004 | 11,002  | 0,616 | 3,630 | 2,833E-04 |
| CPIJ012045 ficolin-2 precursor                           |                                        | 2,239 | 0,002 | 11,796  | 0,576 | 3,886 | 1,020E-04 |
| CPIJ013933 Putative uncharacterized protein              |                                        | 2,242 | 0,000 | 20,339  | 0,491 | 4,567 | 4,949E-06 |
| CPIJ018121 membrane-bound alkaline phosphatase precursor |                                        | 2,248 | 0,055 | 155,553 | 0,847 | 2,655 | 7,942E-03 |
| CPIJ014140 Putative uncharacterized protein              | DEUBAD domain-containing protei        | 2,250 | 0,031 | 4,998   | 0,771 | 2,919 | 3,510E-03 |
| CPIJ009106 angiotensin-converting enzyme precursor       |                                        | 2,261 | 0,001 | 12,079  | 0,569 | 3,974 | 7,078E-05 |
| CPIJ007082 TIM: timeless circadian protein               |                                        | 2,273 | 0,000 | 24,951  | 0,504 | 4,508 | 6,558E-06 |

|                                                                             |                                     |       |       |          |       |        |           |
|-----------------------------------------------------------------------------|-------------------------------------|-------|-------|----------|-------|--------|-----------|
| CPIJ012055 sodium/chloride dependent amino acid transporter, putative       |                                     | 2,280 | 0,002 | 11,184   | 0,585 | 3,894  | 9,857E-05 |
| CPIJ003274 vacuolar proton translocating ATPase 116 kDa subunit a isoform 1 |                                     | 2,291 | 0,058 | 102,318  | 0,875 | 2,620  | 8,804E-03 |
| CPIJ010230 CYP12F10: cytochrome P450 12F10                                  |                                     | 2,319 | 0,000 | 26,553   | 0,430 | 5,394  | 6,896E-08 |
| CPIJ013273 Putative uncharacterized protein                                 | Zinc finger DNA binding protein     | 2,328 | 0,026 | 4,849    | 0,779 | 2,990  | 2,793E-03 |
| CPIJ002073 juvenile hormone esterase                                        |                                     | 2,332 | 0,000 | 25,906   | 0,447 | 5,224  | 1,752E-07 |
| CPIJ007906 Putative uncharacterized protein                                 | Chitin-binding type-2 domain-contai | 2,342 | 0,584 | 16,139   | 2,402 | 0,975  | 3,297E-01 |
| CPIJ007902 Putative uncharacterized protein                                 | Chitin-binding type-2 domain-contai | 2,344 | 0,573 | 112,670  | 2,360 | 0,993  | 3,205E-01 |
| CPIJ012831 Fibrinogen and fibronectin                                       |                                     | 2,345 | 0,000 | 41,356   | 0,426 | 5,508  | 3,624E-08 |
| CPIJ016104 kallikrein-6 precursor                                           |                                     | 2,355 | 0,000 | 21,211   | 0,542 | 4,342  | 1,409E-05 |
| CPIJ007897 Putative uncharacterized protein                                 | Chitin-binding type-2 domain-contai | 2,356 | 0,479 | 64,607   | 1,961 | 1,202  | 2,295E-01 |
| CPIJ001747 tep3                                                             |                                     | 2,389 | 0,000 | 28,024   | 0,439 | 5,447  | 5,137E-08 |
| CPIJ010067 ATP-binding cassette sub-family A member 3                       |                                     | 2,402 | 0,000 | 269,934  | 0,343 | 7,012  | 2,343E-12 |
| CPIJ005728 Putative uncharacterized protein                                 | Ig-like domain-containing protein   | 2,406 | 0,000 | 22,553   | 0,442 | 5,443  | 5,233E-08 |
| CPIJ008499 Putative uncharacterized protein                                 | Chitin-binding type-2 domain-contai | 2,425 | 0,098 | 24,890   | 1,030 | 2,354  | 1,859E-02 |
| CPIJ013793 Cuticle protein 8                                                |                                     | 2,431 | 0,000 | 106,634  | 0,360 | 6,761  | 1,374E-11 |
| CPIJ010313 Putative uncharacterized protein                                 | CHK kinase-like domain-containing   | 2,443 | 0,005 | 7,820    | 0,676 | 3,612  | 3,033E-04 |
| CPIJ016301 Serine protease inhibitor A3G                                    |                                     | 2,448 | 0,000 | 12,682   | 0,567 | 4,314  | 1,601E-05 |
| CPIJ002849 Putative uncharacterized protein                                 | Single domain-containing protein    | 2,482 | 0,000 | 21,258   | 0,455 | 5,460  | 4,748E-08 |
| CPIJ006081 trypsin alpha precursor                                          |                                     | 2,483 | 0,000 | 24,652   | 0,551 | 4,510  | 6,486E-06 |
| CPIJ017285 Putative uncharacterized protein                                 | F-box domain-containing protein     | 2,484 | 0,006 | 7,087    | 0,702 | 3,541  | 3,990E-04 |
| CPIJ016105 trypsin-3 precursor                                              |                                     | 2,487 | 0,002 | 17,159   | 0,644 | 3,863  | 1,120E-04 |
| CPIJ000365 Putative uncharacterized protein                                 |                                     | 2,491 | 0,005 | 7,151    | 0,699 | 3,565  | 3,634E-04 |
| CPIJ010307 Putative uncharacterized protein                                 | CHK kinase-like domain-containing   | 2,543 | 0,000 | 310,310  | 0,219 | 11,597 | 4,271E-31 |
| CPIJ019874 salivary cysteine-rich peptide                                   |                                     | 2,546 | 0,000 | 15,227   | 0,531 | 4,796  | 1,616E-06 |
| CPIJ002937 trypsin delta/gamma precursor                                    |                                     | 2,555 | 0,182 | 92,573   | 1,283 | 1,992  | 4,640E-02 |
| CPIJ008079 alpha-amylase 1 precursor                                        |                                     | 2,568 | 0,000 | 1269,734 | 0,224 | 11,447 | 2,443E-30 |
| CPIJ002863 Putative uncharacterized protein                                 |                                     | 2,596 | 0,004 | 7,139    | 0,711 | 3,650  | 2,618E-04 |
| CPIJ000495 Putative uncharacterized protein                                 |                                     | 2,601 | 0,001 | 210,325  | 0,638 | 4,075  | 4,600E-05 |
| CPIJ010456 Cysteine dioxygenase                                             |                                     | 2,612 | 0,000 | 48,302   | 0,379 | 6,884  | 5,829E-12 |
| CPIJ004228 Lipase                                                           |                                     | 2,668 | 0,000 | 972,325  | 0,280 | 9,535  | 1,501E-21 |
| CPIJ014406 Putative uncharacterized protein                                 |                                     | 2,684 | 0,000 | 21,685   | 0,516 | 5,201  | 1,986E-07 |
| CPIJ001777 ataxia telangiectasia mutated, putative                          |                                     | 2,686 | 0,001 | 9,725    | 0,650 | 4,135  | 3,542E-05 |
| CPIJ007777 Putative uncharacterized protein                                 |                                     | 2,702 | 0,000 | 11,200   | 0,617 | 4,382  | 1,177E-05 |
| CPIJ003983 Putative uncharacterized protein                                 |                                     | 2,723 | 0,049 | 39,585   | 1,007 | 2,706  | 6,817E-03 |
| CPIJ007898 Putative uncharacterized protein                                 | Chitin-binding type-2 domain-contai | 2,727 | 0,510 | 103,290  | 2,403 | 1,135  | 2,564E-01 |
| CPIJ002066 alpha-galactosidase A precursor                                  |                                     | 2,757 | 0,000 | 105,955  | 0,338 | 8,163  | 3,270E-16 |
| CPIJ010308 Putative uncharacterized protein                                 | CHK kinase-like domain-containing   | 2,764 | 0,000 | 35,443   | 0,393 | 7,040  | 1,928E-12 |
| CPIJ000500 Putative uncharacterized protein                                 |                                     | 2,766 | 0,000 | 254,107  | 0,360 | 7,684  | 1,546E-14 |



|                                                                   |                                     |       |       |          |       |        |           |
|-------------------------------------------------------------------|-------------------------------------|-------|-------|----------|-------|--------|-----------|
| CPIJ006619 Cystathionine gamma-lyase                              |                                     | 2,779 | 0,091 | 68,303   | 1,157 | 2,401  | 1,634E-02 |
| CPIJ017792 Serine protease                                        |                                     | 2,790 | 0,005 | 5,673    | 0,782 | 3,569  | 3,580E-04 |
| CPIJ004730 Putative uncharacterized protein                       | Chitin-binding type-2 domain-contai | 2,793 | 0,000 | 1464,315 | 0,296 | 9,430  | 4,097E-21 |
| CPIJ015809 Putative uncharacterized protein                       | Transmembrane protein 267           | 2,861 | 0,000 | 9,343    | 0,661 | 4,326  | 1,517E-05 |
| CPIJ010412 Fucosyltransferase 11                                  |                                     | 2,878 | 0,000 | 9,895    | 0,673 | 4,276  | 1,906E-05 |
| CPIJ008490 Ankyrin repeat domain-containing protein 44            |                                     | 2,940 | 0,000 | 42,565   | 0,404 | 7,275  | 3,454E-13 |
| CPIJ008127 Putative uncharacterized protein                       |                                     | 2,944 | 0,002 | 7,088    | 0,750 | 3,927  | 8,614E-05 |
| CPIJ012159 Sphingomyelin phosphodiesterase                        |                                     | 3,000 | 0,049 | 38,610   | 1,106 | 2,713  | 6,667E-03 |
| CPIJ008501 Putative uncharacterized protein                       | Chitin-binding type-2 domain-contai | 3,019 | 0,228 | 27,592   | 1,653 | 1,827  | 6,775E-02 |
| CPIJ002535 CYP6AG9: cytochrome P450 6AG9                          |                                     | 3,032 | 0,000 | 56,663   | 0,401 | 7,569  | 3,764E-14 |
| CPIJ001812 Sugar transporter                                      |                                     | 3,068 | 0,000 | 13,136   | 0,662 | 4,631  | 3,636E-06 |
| CPIJ001996 Putative uncharacterized protein                       |                                     | 3,109 | 0,000 | 9,123    | 0,702 | 4,429  | 9,449E-06 |
| CPIJ010546 CYP9J34: cytochrome P450 9J34                          |                                     | 3,109 | 0,000 | 1023,738 | 0,312 | 9,952  | 2,461E-23 |
| CPIJ017065 NMDA-type glutamate receptor subunit 1                 |                                     | 3,149 | 0,000 | 20,962   | 0,528 | 5,966  | 2,433E-09 |
| CPIJ014178 Putative uncharacterized protein                       | Chitin-binding type-2 domain-contai | 3,151 | 0,160 | 33,246   | 1,518 | 2,076  | 3,787E-02 |
| CPIJ016697 Leukocyte elastase inhibitor                           |                                     | 3,215 | 0,000 | 7,636    | 0,750 | 4,287  | 1,812E-05 |
| CPIJ000494 Putative uncharacterized protein                       |                                     | 3,215 | 0,000 | 458,944  | 0,622 | 5,166  | 2,392E-07 |
| CPIJ010175 CYP9J48: cytochrome P450 9J48                          |                                     | 3,220 | 0,000 | 260,587  | 0,356 | 9,048  | 1,452E-19 |
| CPIJ011190 deoxyribonuclease I, putative                          |                                     | 3,260 | 0,000 | 227,742  | 0,272 | 11,994 | 3,827E-33 |
| CPIJ040816 Putative uncharacterized protein                       |                                     | 3,283 | 0,072 | 12,206   | 1,306 | 2,513  | 1,196E-02 |
| CPIJ008502 Putative uncharacterized protein                       | Chitin-binding type-2 domain-contai | 3,320 | 0,066 | 13,396   | 1,300 | 2,553  | 1,067E-02 |
| CPIJ000699 Vago: salivary Cys-rich secreted protein Vago          |                                     | 3,434 | 0,003 | 4,910    | 0,921 | 3,730  | 1,917E-04 |
| CPIJ000496 Putative uncharacterized protein                       | Secreted protein                    | 3,441 | 0,000 | 822,812  | 0,736 | 4,675  | 2,937E-06 |
| CPIJ005229 N-acetylgalactosaminyltransferase 6                    |                                     | 3,482 | 0,002 | 5,460    | 0,899 | 3,874  | 1,070E-04 |
| CPIJ005640 Heat shock protein 26                                  |                                     | 3,664 | 0,000 | 9,051    | 0,799 | 4,587  | 4,492E-06 |
| CPIJ003982 Putative uncharacterized protein                       |                                     | 3,960 | 0,001 | 27,775   | 0,938 | 4,220  | 2,446E-05 |
| CPIJ004489 potassium-dependent sodium-calcium exchanger, putative |                                     | 4,187 | 0,000 | 50,418   | 0,858 | 4,881  | 1,054E-06 |
| CPIJ003458 Putative uncharacterized protein                       | N-acetyltransferase domain-containi | 4,259 | 0,000 | 8,208    | 0,894 | 4,766  | 1,878E-06 |
| CPIJ000094 Putative uncharacterized protein                       |                                     | 4,937 | 0,000 | 13,785   | 0,837 | 5,900  | 3,635E-09 |
| CPIJ006306 Ion channel nomp                                       |                                     | 5,122 | 0,000 | 50,122   | 0,536 | 9,562  | 1,155E-21 |
| CPIJ000093 Putative uncharacterized protein                       |                                     | 5,190 | 0,000 | 8,320    | 1,109 | 4,679  | 2,881E-06 |
| CPIJ016362 alpha-glucosidase precursor                            |                                     | 5,912 | 0,000 | 3,871    | 1,309 | 4,517  | 6,268E-06 |
| CPIJ010801 carboxypeptidase B precursor                           |                                     | 6,001 | 0,000 | 137,607  | 0,433 | 13,848 | 1,301E-43 |
| CPIJ013861 Putative uncharacterized protein                       |                                     | 6,849 | 0,000 | 14,585   | 1,224 | 5,597  | 2,180E-08 |
| CPIJ040083 COX3: cytochrome c oxidase subunit III                 |                                     | 7,017 | 0,000 | 8,260    | 1,286 | 5,457  | 4,842E-08 |
| CPIJ000344 39S ribosomal protein L24, mitochondrial precursor     |                                     | 7,373 | 0,000 | 10,526   | 1,281 | 5,754  | 8,708E-09 |
| CPIJ002522 Farnesol dehydrogenase                                 |                                     | 7,628 | 0,000 | 12,597   | 1,264 | 6,033  | 1,605E-09 |
| CPIJ009033 arylphorin subunit C223 precursor                      |                                     | 9,484 | 0,000 | 45,994   | 1,956 | 4,850  | 1,235E-06 |

**Table S4.** Differentially expressed genes from the *Culex quinquefasciatus* Bin-resistant strains (REC and REC-2), compared to a susceptible strain (S).  
**(B)** REC-2 X S up and down regulated genes.

| ID         | Description                                                | Uniprot Annotation                               | log2Fold |       |          |       |         |           |
|------------|------------------------------------------------------------|--------------------------------------------------|----------|-------|----------|-------|---------|-----------|
|            |                                                            |                                                  | Change   | padj  | baseMean | lfcSE | stat    | pvalue    |
| CPIJ017592 | Vanin-like protein 1 precursor, putative                   |                                                  | -8,265   | 0,000 | 43,044   | 1,212 | -6,821  | 9,064E-12 |
| CPIJ017593 | pantetheinase precursor                                    |                                                  | -8,173   | 0,000 | 78,454   | 1,164 | -7,024  | 2,163E-12 |
| CPIJ005154 | Nuclear transport factor 2                                 |                                                  | -6,705   | 0,000 | 14,678   | 1,236 | -5,424  | 5,817E-08 |
| CPIJ012840 | 39S ribosomal protein L24, mitochondrial precursor         |                                                  | -6,604   | 0,000 | 13,612   | 1,233 | -5,354  | 8,591E-08 |
| CPIJ014889 | Pyruvate dehydrogenase E1 component subunit alpha          |                                                  | -6,453   | 0,000 | 12,320   | 1,239 | -5,208  | 1,906E-07 |
| CPIJ002679 | Glutathione S-transferase theta-2                          |                                                  | -5,731   | 0,002 | 123,580  | 1,477 | -3,880  | 1,045E-04 |
| CPIJ009924 | Putative uncharacterized protein                           |                                                  | -5,514   | 0,000 | 6,459    | 1,266 | -4,356  | 1,327E-05 |
| CPIJ017634 | Disulfide oxidoreductase                                   |                                                  | -5,247   | 0,001 | 5,254    | 1,280 | -4,100  | 4,125E-05 |
| CPIJ017291 | Putative uncharacterized protein                           | DNA damage-binding protein 1                     | -4,866   | 0,003 | 4,070    | 1,286 | -3,782  | 1,553E-04 |
| CPIJ013539 | ankyrin repeat and SOCS box protein 10                     |                                                  | -4,792   | 0,004 | 3,917    | 1,289 | -3,718  | 2,011E-04 |
| CPIJ018744 | ankyrin 2,3/unc44                                          |                                                  | -4,756   | 0,000 | 40,751   | 0,651 | -7,310  | 2,681E-13 |
| CPIJ006466 | H/ACA ribonucleoprotein complex subunit 4                  |                                                  | -4,546   | 0,008 | 3,220    | 1,305 | -3,483  | 4,964E-04 |
| CPIJ002989 | Oseg1                                                      |                                                  | -4,386   | 0,006 | 5,974    | 1,223 | -3,588  | 3,338E-04 |
| CPIJ007230 | Regucalcin                                                 |                                                  | -4,349   | 0,007 | 5,607    | 1,230 | -3,537  | 4,047E-04 |
| CPIJ019172 | Histone deacetylase                                        |                                                  | -4,272   | 0,016 | 2,745    | 1,315 | -3,250  | 1,156E-03 |
| CPIJ012061 | hyp37.3 putativeselected salivary gland protein            |                                                  | -4,164   | 0,000 | 18,563   | 0,814 | -5,116  | 3,122E-07 |
| CPIJ013173 | Neutral and basic amino acid transport protein rBAT        | Culex quinquefasciatus maltase 1                 | -4,140   | 0,000 | 1194,580 | 0,210 | -19,754 | 7,346E-87 |
| CPIJ016846 | CYP6M13: cytochrome P450 6M13                              |                                                  | -4,010   | 0,000 | 85,651   | 0,767 | -5,231  | 1,690E-07 |
| CPIJ019567 | vegetatible incompatibility protein HET-E-1, putative      |                                                  | -4,001   | 0,004 | 8,274    | 1,078 | -3,711  | 2,065E-04 |
| CPIJ012066 | sodium/chloride dependent amino acid transporter, putative |                                                  | -3,914   | 0,000 | 633,940  | 0,273 | -14,326 | 1,516E-46 |
| CPIJ014435 | Putative uncharacterized protein                           | Cuticle protein                                  | -3,903   | 0,012 | 17,633   | 1,169 | -3,339  | 8,404E-04 |
| CPIJ012702 | Putative uncharacterized protein                           | CHK kinase-like domain-containing protein        | -3,756   | 0,000 | 17,432   | 0,736 | -5,104  | 3,320E-07 |
| CPIJ005064 | alpha-amylase precursor                                    |                                                  | -3,720   | 0,034 | 3,927    | 1,257 | -2,959  | 3,083E-03 |
| CPIJ012697 | Putative uncharacterized protein                           | CHK kinase-like domain-containing protein        | -3,710   | 0,000 | 19,122   | 0,682 | -5,439  | 5,366E-08 |
| CPIJ015140 | Putative uncharacterized protein                           | PiggyBac transposable element-derived protein dc | -3,703   | 0,034 | 3,672    | 1,252 | -2,958  | 3,099E-03 |
| CPIJ011602 | NADH-cytochrome b5 reductase                               |                                                  | -3,577   | 0,002 | 9,440    | 0,923 | -3,876  | 1,062E-04 |
| CPIJ017738 | plasminogen precursor                                      |                                                  | -3,559   | 0,045 | 3,564    | 1,255 | -2,836  | 4,561E-03 |
| CPIJ010515 | Phosphoenolpyruvate carboxykinase                          |                                                  | -3,541   | 0,051 | 3,519    | 1,271 | -2,785  | 5,349E-03 |
| CPIJ004607 | Putative uncharacterized protein                           | C-type lectin domain-containing protein          | -3,256   | 0,039 | 4,842    | 1,121 | -2,904  | 3,679E-03 |
| CPIJ007273 | D-amino acid oxidase                                       |                                                  | -3,226   | 0,089 | 2,661    | 1,273 | -2,533  | 1,131E-02 |
| CPIJ010699 | CecA1: Cecropin A                                          |                                                  | -3,212   | 0,004 | 9,357    | 0,870 | -3,690  | 2,239E-04 |
| CPIJ018624 | Glutathione-s-transferase theta, gst                       |                                                  | -3,209   | 0,000 | 73,302   | 0,396 | -8,103  | 5,382E-16 |
| CPIJ015947 | purine nucleoside phosphorylase                            |                                                  | -3,196   | 0,096 | 2,930    | 1,280 | -2,496  | 1,256E-02 |
| CPIJ008729 | 4-aminobutyrate aminotransferase, mitochondrial precursor  |                                                  | -3,184   | 0,000 | 19,642   | 0,661 | -4,818  | 1,451E-06 |

|            |                                                   |        |       |          |       |        |           |
|------------|---------------------------------------------------|--------|-------|----------|-------|--------|-----------|
| CPIJ012700 | CHKov1, putative                                  | -3,135 | 0,000 | 42,879   | 0,453 | -6,920 | 4,522E-12 |
| CPIJ017652 | GPI transamidase component PIG-T precursor        | -3,115 | 0,016 | 6,887    | 0,961 | -3,242 | 1,186E-03 |
| CPIJ017473 | Organic cation transporter                        | -3,065 | 0,000 | 13,739   | 0,691 | -4,432 | 9,316E-06 |
| CPIJ012841 | Valacyclovir hydrolase                            | -3,048 | 0,059 | 4,298    | 1,119 | -2,724 | 6,444E-03 |
| CPIJ007525 | Putative uncharacterized protein                  | -3,040 | 0,000 | 19,878   | 0,584 | -5,205 | 1,937E-07 |
| CPIJ002307 | Putative uncharacterized protein                  | -3,033 | 0,070 | 3,955    | 1,144 | -2,651 | 8,029E-03 |
| CPIJ005656 | Oxidoreductase                                    | -3,006 | 0,000 | 15,158   | 0,656 | -4,586 | 4,528E-06 |
| CPIJ004537 | Double-strand break repair protein MRE11          | -2,965 | 0,070 | 4,189    | 1,120 | -2,647 | 8,126E-03 |
| CPIJ018326 | Putative uncharacterized protein                  | -2,915 | 0,000 | 253,745  | 0,317 | -9,203 | 3,470E-20 |
| CPIJ018626 | Glutathione-s-transferase theta, gst              | -2,892 | 0,000 | 236,473  | 0,312 | -9,281 | 1,679E-20 |
| CPIJ012829 | Fibrinogen and fibronectin                        | -2,841 | 0,000 | 110,063  | 0,302 | -9,406 | 5,134E-21 |
| CPIJ007346 | TTC27 protein                                     | -2,823 | 0,011 | 7,832    | 0,840 | -3,363 | 7,714E-04 |
| CPIJ012699 | Putative uncharacterized protein                  | -2,819 | 0,003 | 10,353   | 0,749 | -3,765 | 1,662E-04 |
| CPIJ003266 | CCAAT/enhancer-binding protein                    | -2,808 | 0,002 | 10,474   | 0,727 | -3,864 | 1,114E-04 |
| CPIJ012562 | 26S proteasome non-ATPase regulatory subunit 10   | -2,761 | 0,102 | 3,937    | 1,120 | -2,465 | 1,369E-02 |
| CPIJ000718 | Transketolase                                     | -2,750 | 0,112 | 3,635    | 1,137 | -2,419 | 1,557E-02 |
| CPIJ004873 | Putative uncharacterized protein                  | -2,727 | 0,002 | 11,820   | 0,687 | -3,972 | 7,124E-05 |
| CPIJ019428 | trypsin 2 precursor                               | -2,693 | 0,023 | 7,226    | 0,870 | -3,096 | 1,958E-03 |
| CPIJ008739 | Polycomb protein                                  | -2,668 | 0,130 | 3,433    | 1,136 | -2,348 | 1,888E-02 |
| CPIJ002675 | Glutathione S-transferase 1                       | -2,648 | 0,003 | 1098,694 | 0,700 | -3,782 | 1,557E-04 |
| CPIJ016453 | Acyl-coa dehydrogenase                            | -2,616 | 0,000 | 24,913   | 0,494 | -5,294 | 1,198E-07 |
| CPIJ020105 | apolipoprotein D, putative                        | -2,603 | 0,015 | 8,140    | 0,797 | -3,268 | 1,083E-03 |
| CPIJ002194 | Synaptojanin                                      | -2,571 | 0,076 | 4,638    | 0,985 | -2,610 | 9,048E-03 |
| CPIJ015685 | 3-oxoacyl-[acyl-carrier-protein] reductase        | -2,542 | 0,167 | 3,099    | 1,153 | -2,205 | 2,749E-02 |
| CPIJ013313 | apolipoprotein D, putative                        | -2,503 | 0,116 | 39,658   | 1,042 | -2,401 | 1,633E-02 |
| CPIJ016639 | acetyl-coa synthetase                             | -2,499 | 0,000 | 72,593   | 0,348 | -7,182 | 6,865E-13 |
| CPIJ006734 | DNA-directed RNA polymerase II 16 kDa polypeptide | -2,497 | 0,007 | 9,754    | 0,710 | -3,515 | 4,391E-04 |
| CPIJ000225 | UDP-glucuronosyltransferase R-21                  | -2,482 | 0,000 | 105,729  | 0,288 | -8,609 | 7,357E-18 |
| CPIJ006014 | Serine protease                                   | -2,462 | 0,184 | 3,544    | 1,145 | -2,150 | 3,152E-02 |
| CPIJ008664 | Putative uncharacterized protein                  | -2,435 | 0,000 | 128,727  | 0,389 | -6,262 | 3,795E-10 |
| CPIJ012919 | GDP-mannose 4,6 dehydratase                       | -2,421 | 0,117 | 3,971    | 1,010 | -2,397 | 1,654E-02 |
| CPIJ018769 | Miranda                                           | -2,403 | 0,012 | 9,147    | 0,721 | -3,333 | 8,592E-04 |
| CPIJ002676 | Glutathione S-transferase D7                      | -2,379 | 0,000 | 64,479   | 0,339 | -7,024 | 2,152E-12 |
| CPIJ014327 | Sugar transporter SWEET                           | -2,374 | 0,026 | 7,548    | 0,778 | -3,052 | 2,271E-03 |
| CPIJ019704 | CYP6N24: cytochrome P450 6N24                     | -2,340 | 0,002 | 13,146   | 0,608 | -3,852 | 1,174E-04 |
| CPIJ012065 | tryptophan transporter                            | -2,339 | 0,000 | 40,711   | 0,419 | -5,587 | 2,305E-08 |
| CPIJ015938 | Putative uncharacterized protein                  | -2,328 | 0,070 | 6,178    | 0,878 | -2,650 | 8,046E-03 |
| CPIJ009775 | Putative uncharacterized protein                  | -2,321 | 0,131 | 4,124    | 0,992 | -2,340 | 1,929E-02 |

|            |                                                      |                                                  |        |       |          |       |         |           |
|------------|------------------------------------------------------|--------------------------------------------------|--------|-------|----------|-------|---------|-----------|
| CPIJ004709 | Bifunctional protein fold                            |                                                  | -2,312 | 0,000 | 46,653   | 0,454 | -5,087  | 3,642E-07 |
| CPIJ018994 | Uncharacterized protein (Fragment)                   |                                                  | -2,306 | 0,130 | 4,542    | 0,983 | -2,347  | 1,894E-02 |
| CPIJ013981 | mediator complex, subunit, putative                  |                                                  | -2,292 | 0,236 | 2,715    | 1,157 | -1,981  | 4,761E-02 |
| CPIJ005349 | lysosomal acid lipase, putative                      |                                                  | -2,262 | 0,053 | 6,578    | 0,817 | -2,767  | 5,661E-03 |
| CPIJ012605 | Exu-associated protein                               |                                                  | -2,245 | 0,154 | 3,902    | 0,998 | -2,248  | 2,454E-02 |
| CPIJ005792 | nuclear pore complex protein Nup93                   |                                                  | -2,240 | 0,149 | 4,293    | 0,986 | -2,272  | 2,310E-02 |
| CPIJ005505 | Putative uncharacterized protein                     |                                                  | -2,233 | 0,000 | 20,748   | 0,500 | -4,468  | 7,897E-06 |
| CPIJ010860 | cat eye syndrome critical region protein 1 precursor |                                                  | -2,231 | 0,255 | 2,627    | 1,160 | -1,924  | 5,441E-02 |
| CPIJ007924 | Proteasome assembly chaperone 2                      |                                                  | -2,227 | 0,177 | 3,492    | 1,026 | -2,171  | 2,995E-02 |
| CPIJ005214 | Ceramide glucosyltransferase                         |                                                  | -2,221 | 0,000 | 30,753   | 0,429 | -5,175  | 2,280E-07 |
| CPIJ013570 | protein sym-1                                        |                                                  | -2,220 | 0,092 | 5,398    | 0,882 | -2,518  | 1,180E-02 |
| CPIJ016852 | CYP6N19: cytochrome P450 6N19                        |                                                  | -2,201 | 0,000 | 227,305  | 0,268 | -8,212  | 2,173E-16 |
| CPIJ007224 | Methyl-cpg binding protein                           |                                                  | -2,194 | 0,102 | 4,866    | 0,890 | -2,465  | 1,369E-02 |
| CPIJ002336 | Putative uncharacterized protein                     | Acetyl-coa transporter                           | -2,180 | 0,001 | 19,566   | 0,539 | -4,043  | 5,284E-05 |
| CPIJ009657 | Putative uncharacterized protein                     | Nucleolar protein 16                             | -2,175 | 0,066 | 6,363    | 0,813 | -2,675  | 7,465E-03 |
| CPIJ010919 | protein will die slowly                              |                                                  | -2,168 | 0,143 | 4,365    | 0,945 | -2,296  | 2,170E-02 |
| CPIJ008426 | Putative uncharacterized protein                     | Monocarboxylate transporter                      | -2,165 | 0,277 | 2,642    | 1,161 | -1,864  | 6,230E-02 |
| CPIJ015946 | guanylate cyclase, putative                          |                                                  | -2,161 | 0,292 | 2,317    | 1,185 | -1,824  | 6,822E-02 |
| CPIJ003163 | Putative uncharacterized protein                     |                                                  | -2,156 | 0,007 | 12,270   | 0,613 | -3,518  | 4,345E-04 |
| CPIJ011623 | Putative uncharacterized protein                     | Chitin-binding type-2 domain-containing protein  | -2,151 | 0,000 | 86,516   | 0,339 | -6,352  | 2,126E-10 |
| CPIJ002911 | retinoid-inducible serine carboxypeptidase precursor |                                                  | -2,151 | 0,000 | 100,166  | 0,272 | -7,903  | 2,712E-15 |
| CPIJ007010 | Peroxisomal membrane protein pmp34                   |                                                  | -2,129 | 0,016 | 11,764   | 0,656 | -3,245  | 1,175E-03 |
| CPIJ012180 | Putative uncharacterized protein                     | MD-2-related lipid-recognition domain-containing | -2,123 | 0,000 | 1108,246 | 0,184 | -11,535 | 8,794E-31 |
| CPIJ009939 | Putative uncharacterized protein                     |                                                  | -2,110 | 0,050 | 8,172    | 0,756 | -2,792  | 5,231E-03 |
| CPIJ004068 | Suppressor of T-cell receptor signaling 1            |                                                  | -2,109 | 0,000 | 36,021   | 0,453 | -4,652  | 3,284E-06 |
| CPIJ015475 | Thiamin pyrophosphokinase 1                          |                                                  | -2,107 | 0,179 | 4,436    | 0,975 | -2,163  | 3,058E-02 |
| CPIJ005160 | serine protease htra2, putative                      |                                                  | -2,100 | 0,110 | 5,349    | 0,866 | -2,426  | 1,526E-02 |
| CPIJ014772 | techylectin-5B precursor                             |                                                  | -2,099 | 0,044 | 9,362    | 0,738 | -2,845  | 4,447E-03 |
| CPIJ014142 | nucleotide-binding protein 1                         |                                                  | -2,091 | 0,012 | 14,774   | 0,623 | -3,355  | 7,946E-04 |
| CPIJ005304 | DNA-directed RNA polymerase II subunit J             |                                                  | -2,088 | 0,074 | 6,229    | 0,797 | -2,622  | 8,745E-03 |
| CPIJ005595 | Fatty acid synthase S-acetyltransferase              |                                                  | -2,086 | 0,000 | 187,945  | 0,279 | -7,482  | 7,346E-14 |
| CPIJ016341 | alpha-esterase                                       |                                                  | -2,084 | 0,577 | 11,348   | 1,793 | -1,162  | 2,452E-01 |
| CPIJ005780 | Pre-mRNA-splicing factor cef-1                       |                                                  | -2,070 | 0,092 | 5,621    | 0,822 | -2,518  | 1,181E-02 |
| CPIJ000058 | Receptor protein tyrosine kinase                     |                                                  | -2,069 | 0,118 | 5,267    | 0,865 | -2,392  | 1,675E-02 |
| CPIJ004369 | glucosyl transferase                                 |                                                  | -2,062 | 0,000 | 42,001   | 0,437 | -4,713  | 2,445E-06 |
| CPIJ004872 | protein phosphatase 2C isoform beta                  |                                                  | -2,028 | 0,003 | 17,620   | 0,534 | -3,800  | 1,445E-04 |
| CPIJ006314 | Putative uncharacterized protein                     | 3'-5' exonuclease domain-containing protein      | -2,024 | 0,347 | 2,151    | 1,199 | -1,688  | 9,140E-02 |
| CPIJ019569 | Juvenile hormone-inducible protein, putative         |                                                  | -2,023 | 0,347 | 2,147    | 1,199 | -1,687  | 9,163E-02 |

|                                                                 |                                                    |        |       |         |       |        |           |
|-----------------------------------------------------------------|----------------------------------------------------|--------|-------|---------|-------|--------|-----------|
| CPIJ006677 Putative uncharacterized protein                     | Nose resistant-to-fluoxetine protein N-terminal do | -2,000 | 0,026 | 10,171  | 0,654 | -3,060 | 2,210E-03 |
| CPIJ009093 Ornithine decarboxylase                              |                                                    | -1,997 | 0,000 | 74,162  | 0,359 | -5,564 | 2,631E-08 |
| CPIJ009256 Putative uncharacterized protein                     | FHA domain-containing protein                      | -1,994 | 0,148 | 4,927   | 0,877 | -2,274 | 2,296E-02 |
| CPIJ014363 Rrp15 protein                                        |                                                    | -1,976 | 0,026 | 10,054  | 0,645 | -3,062 | 2,196E-03 |
| CPIJ012125 FK506 binding protein                                |                                                    | -1,974 | 0,155 | 4,753   | 0,880 | -2,243 | 2,487E-02 |
| CPIJ007583 pantetheinase precursor                              |                                                    | -1,965 | 0,000 | 155,498 | 0,305 | -6,440 | 1,191E-10 |
| CPIJ006313 lipoate-protein ligase                               |                                                    | -1,954 | 0,234 | 4,112   | 0,982 | -1,989 | 4,667E-02 |
| CPIJ003292 Putative uncharacterized protein                     | RING-type domain-containing protein                | -1,931 | 0,259 | 3,317   | 1,012 | -1,909 | 5,628E-02 |
| CPIJ019818 Phosphopantothenoylcysteine decarboxylase            |                                                    | -1,911 | 0,099 | 6,184   | 0,770 | -2,482 | 1,307E-02 |
| CPIJ017233 Actin-binding protein ipp                            |                                                    | -1,911 | 0,275 | 3,113   | 1,022 | -1,870 | 6,145E-02 |
| CPIJ008878 prolylcarboxypeptidase, putative                     |                                                    | -1,883 | 0,004 | 19,020  | 0,515 | -3,658 | 2,541E-04 |
| CPIJ007633 ATP-dependent DNA helicase hus2/rqh1                 |                                                    | -1,882 | 0,300 | 2,871   | 1,042 | -1,805 | 7,100E-02 |
| CPIJ010762 glucosyl/glucuronosyl transferases                   |                                                    | -1,880 | 0,041 | 10,964  | 0,654 | -2,874 | 4,056E-03 |
| CPIJ016848 CYP6M14: cytochrome P450 6M14                        |                                                    | -1,878 | 0,000 | 812,195 | 0,285 | -6,589 | 4,442E-11 |
| CPIJ012737 Nucleoporin 50kDa                                    |                                                    | -1,876 | 0,042 | 10,069  | 0,654 | -2,866 | 4,151E-03 |
| CPIJ014285 3-oxoacyl-[acyl-carrier-protein] reductase           |                                                    | -1,875 | 0,087 | 8,384   | 0,737 | -2,544 | 1,097E-02 |
| CPIJ019673 CYP6AG15: cytochrome P450 6AG15                      |                                                    | -1,872 | 0,000 | 37,474  | 0,389 | -4,812 | 1,497E-06 |
| CPIJ015408 branched-chain amino acid aminotransferase           |                                                    | -1,866 | 0,000 | 84,528  | 0,304 | -6,136 | 8,450E-10 |
| CPIJ000761 protein expanded                                     |                                                    | -1,855 | 0,280 | 3,383   | 1,000 | -1,855 | 6,365E-02 |
| CPIJ011433 Brachyurin                                           |                                                    | -1,845 | 0,194 | 100,401 | 0,872 | -2,117 | 3,427E-02 |
| CPIJ008896 Putative uncharacterized protein                     | Phorbol-ester/DAG-type domain-containing protei    | -1,841 | 0,219 | 4,230   | 0,902 | -2,042 | 4,112E-02 |
| CPIJ015964 Brain protein 16                                     |                                                    | -1,835 | 0,205 | 5,042   | 0,880 | -2,084 | 3,713E-02 |
| CPIJ006716 peptidoglycan recognition protein sb2                |                                                    | -1,835 | 0,105 | 6,420   | 0,749 | -2,450 | 1,429E-02 |
| CPIJ005330 60S ribosome subunit biogenesis protein NIP7 homolog |                                                    | -1,832 | 0,032 | 11,729  | 0,614 | -2,982 | 2,865E-03 |
| CPIJ007736 Steroid dehydrogenase                                |                                                    | -1,828 | 0,009 | 19,723  | 0,532 | -3,435 | 5,926E-04 |
| CPIJ010538 CYP9J46: cytochrome P450 9J46                        |                                                    | -1,822 | 0,000 | 64,797  | 0,357 | -5,112 | 3,196E-07 |
| CPIJ016828 26S proteasome regulatory subunit S3                 |                                                    | -1,818 | 0,158 | 5,535   | 0,813 | -2,236 | 2,535E-02 |
| CPIJ017594 Putative uncharacterized protein                     | mRNA decay factor PAT1 domain-containing pro       | -1,814 | 0,132 | 6,118   | 0,776 | -2,336 | 1,948E-02 |
| CPIJ018795 14.5 kDa salivary protein, putative                  |                                                    | -1,814 | 0,065 | 8,316   | 0,676 | -2,682 | 7,323E-03 |
| CPIJ005585 Putative uncharacterized protein                     | E3 ubiquitin-protein ligase E3D                    | -1,813 | 0,302 | 3,411   | 1,006 | -1,801 | 7,163E-02 |
| CPIJ010738 protein FAM96A                                       |                                                    | -1,812 | 0,004 | 18,044  | 0,490 | -3,698 | 2,171E-04 |
| CPIJ003123 DNA-directed RNA polymerase I 40 kDa polypeptide     |                                                    | -1,806 | 0,040 | 10,479  | 0,623 | -2,898 | 3,755E-03 |
| CPIJ018533 MAP kinase JNK                                       |                                                    | -1,785 | 0,416 | 2,376   | 1,168 | -1,529 | 1,263E-01 |
| CPIJ020137 Ceramidase                                           |                                                    | -1,771 | 0,320 | 3,283   | 1,008 | -1,757 | 7,888E-02 |
| CPIJ001657 Organic cation transporter protein                   |                                                    | -1,770 | 0,216 | 4,382   | 0,862 | -2,054 | 3,993E-02 |
| CPIJ017306 Sterol desaturase                                    |                                                    | -1,767 | 0,016 | 13,947  | 0,547 | -3,231 | 1,235E-03 |
| CPIJ003814 cell cycle checkpoint protein rad17, putative        |                                                    | -1,765 | 0,431 | 2,149   | 1,186 | -1,488 | 1,369E-01 |
| CPIJ019825 Putative uncharacterized protein                     |                                                    | -1,762 | 0,320 | 3,816   | 1,001 | -1,761 | 7,831E-02 |

|                                                                                 |                                            |        |       |          |       |        |           |
|---------------------------------------------------------------------------------|--------------------------------------------|--------|-------|----------|-------|--------|-----------|
| CPIJ020199 CYP6N20: cytochrome P450 6N20                                        |                                            | -1,760 | 0,001 | 28,286   | 0,436 | -4,038 | 5,397E-05 |
| CPIJ009320 Ethanolamine-phosphate cytidyltransferase                            |                                            | -1,750 | 0,001 | 38,588   | 0,415 | -4,217 | 2,479E-05 |
| CPIJ001316 6-phosphogluconate dehydrogenase, decarboxylating                    |                                            | -1,749 | 0,000 | 56,206   | 0,330 | -5,297 | 1,174E-07 |
| CPIJ006169 WD repeat protein 74                                                 |                                            | -1,748 | 0,060 | 10,041   | 0,643 | -2,718 | 6,576E-03 |
| CPIJ016145 Predicted protein                                                    |                                            | -1,747 | 0,028 | 12,274   | 0,578 | -3,024 | 2,495E-03 |
| CPIJ016651 HemK methyltransferase family member 1                               |                                            | -1,737 | 0,148 | 6,239    | 0,763 | -2,277 | 2,276E-02 |
| CPIJ005830 glutaredoxin, putative                                               |                                            | -1,727 | 0,000 | 36,509   | 0,374 | -4,621 | 3,821E-06 |
| CPIJ007384 azurocidin precursor                                                 |                                            | -1,726 | 0,040 | 1022,485 | 0,598 | -2,886 | 3,905E-03 |
| CPIJ011327 Putative uncharacterized protein                                     | HTH CENPB-type domain-containing protein   | -1,723 | 0,141 | 6,794    | 0,748 | -2,305 | 2,118E-02 |
| CPIJ016855 CYP6N20: cytochrome P450 6N20                                        |                                            | -1,722 | 0,000 | 186,436  | 0,282 | -6,106 | 1,019E-09 |
| CPIJ000031 Glutathione S-transferase                                            |                                            | -1,714 | 0,000 | 128,763  | 0,273 | -6,278 | 3,432E-10 |
| CPIJ001160 Abc transporter                                                      |                                            | -1,713 | 0,000 | 40,813   | 0,360 | -4,760 | 1,941E-06 |
| CPIJ020264 UDP-glucuronosyltransferase 2B15 precursor                           |                                            | -1,704 | 0,019 | 16,595   | 0,539 | -3,163 | 1,561E-03 |
| CPIJ006115 Mck1                                                                 |                                            | -1,703 | 0,130 | 6,529    | 0,726 | -2,347 | 1,893E-02 |
| CPIJ008422 Serine esterase                                                      |                                            | -1,698 | 0,000 | 84,719   | 0,376 | -4,516 | 6,288E-06 |
| CPIJ013581 Putative uncharacterized protein                                     |                                            | -1,697 | 0,289 | 3,690    | 0,926 | -1,832 | 6,691E-02 |
| CPIJ005288 SM protein G, putative                                               |                                            | -1,687 | 0,259 | 4,088    | 0,884 | -1,909 | 5,629E-02 |
| CPIJ018757 Gh regulated tbc protein-1                                           |                                            | -1,683 | 0,222 | 5,131    | 0,827 | -2,034 | 4,198E-02 |
| CPIJ000616 clip-domain serine protease, putative                                |                                            | -1,678 | 0,264 | 4,485    | 0,887 | -1,893 | 5,838E-02 |
| CPIJ014898 protein tyrosine phosphatase n11                                     |                                            | -1,678 | 0,275 | 4,069    | 0,897 | -1,870 | 6,152E-02 |
| CPIJ014207 Elongator complex protein 2                                          |                                            | -1,673 | 0,375 | 2,738    | 1,033 | -1,620 | 1,051E-01 |
| CPIJ002103 Putative uncharacterized protein                                     |                                            | -1,662 | 0,000 | 1047,502 | 0,304 | -5,475 | 4,372E-08 |
| CPIJ008163 Skeletal muscle/kidney enriched inositol 5-phosphatase               |                                            | -1,657 | 0,015 | 15,358   | 0,509 | -3,256 | 1,129E-03 |
| CPIJ009805 Putative uncharacterized protein                                     | CYTH domain-containing protein             | -1,645 | 0,372 | 3,087    | 1,011 | -1,627 | 1,037E-01 |
| CPIJ003059 acyl-CoA oxidase                                                     |                                            | -1,645 | 0,000 | 202,446  | 0,263 | -6,252 | 4,048E-10 |
| CPIJ008272 BTB/POZ domain-containing protein 3                                  |                                            | -1,643 | 0,289 | 4,112    | 0,897 | -1,832 | 6,699E-02 |
| CPIJ011633 short-chain specific acyl-CoA dehydrogenase, mitochondrial precursor |                                            | -1,640 | 0,008 | 19,104   | 0,469 | -3,498 | 4,688E-04 |
| CPIJ012130 Putative uncharacterized protein                                     | Signal recognition particle 19 kDa protein | -1,637 | 0,068 | 11,080   | 0,616 | -2,660 | 7,815E-03 |
| CPIJ000529 Putative uncharacterized protein                                     |                                            | -1,634 | 0,300 | 3,914    | 0,904 | -1,808 | 7,067E-02 |
| CPIJ016477 Putative uncharacterized protein                                     |                                            | -1,623 | 0,133 | 7,693    | 0,696 | -2,332 | 1,972E-02 |
| CPIJ002156 chymotrypsin BI precursor                                            |                                            | -1,622 | 0,000 | 268,860  | 0,326 | -4,970 | 6,700E-07 |
| CPIJ013521 Putative uncharacterized protein                                     | Protein quiver                             | -1,622 | 0,397 | 2,819    | 1,032 | -1,571 | 1,161E-01 |
| CPIJ006691 insect replication protein a, putative                               |                                            | -1,620 | 0,116 | 7,589    | 0,674 | -2,403 | 1,628E-02 |
| CPIJ003520 Pre-mRNA-splicing factor ATP-dependent RNA helicase prp22            |                                            | -1,615 | 0,195 | 5,772    | 0,765 | -2,112 | 3,465E-02 |
| CPIJ018693 Hyp37.3 putative secreted salivary gland protein                     |                                            | -1,612 | 0,001 | 44,508   | 0,383 | -4,213 | 2,521E-05 |
| CPIJ001219 DNA-directed RNA polymerase II 19 kDa polypeptide                    |                                            | -1,610 | 0,185 | 5,770    | 0,750 | -2,145 | 3,192E-02 |
| CPIJ001801 Endocuticle structural glycoprotein SgAbd-1                          |                                            | -1,610 | 0,696 | 48,959   | 1,781 | -0,904 | 3,662E-01 |
| CPIJ012888 rRNA processing protein Ebp2                                         |                                            | -1,610 | 0,160 | 7,492    | 0,723 | -2,228 | 2,590E-02 |
| CPIJ019702 CYP6M16: cytochrome P450 6M16                                        |                                            | -1,609 | 0,004 | 50,904   | 0,434 | -3,710 | 2,072E-04 |



|                                                                          |                                                                  |        |       |          |       |        |           |
|--------------------------------------------------------------------------|------------------------------------------------------------------|--------|-------|----------|-------|--------|-----------|
| CPIJ011457 Putative uncharacterized protein                              | DUF4149 domain-containing protein                                | -1,609 | 0,000 | 42,890   | 0,375 | -4,293 | 1,766E-05 |
| CPIJ012908 Glutaminy-peptide cyclotransferase                            |                                                                  | -1,597 | 0,238 | 5,332    | 0,809 | -1,975 | 4,827E-02 |
| CPIJ000840 Putative uncharacterized protein                              | Enoyl reductase (ER) domain-containing protein                   | -1,595 | 0,000 | 63,350   | 0,311 | -5,122 | 3,021E-07 |
| CPIJ015346 Glutaredoxin, grx                                             |                                                                  | -1,579 | 0,327 | 3,830    | 0,908 | -1,739 | 8,211E-02 |
| CPIJ007558 Lethal(3)malignant brain tumor                                |                                                                  | -1,579 | 0,230 | 5,311    | 0,788 | -2,004 | 4,511E-02 |
| CPIJ013810 Cartilage associated protein                                  |                                                                  | -1,577 | 0,084 | 9,563    | 0,616 | -2,559 | 1,050E-02 |
| CPIJ006724 tubulin alpha-1 chain                                         |                                                                  | -1,576 | 0,000 | 422,770  | 0,222 | -7,091 | 1,330E-12 |
| CPIJ009355 Putative uncharacterized protein                              | S phase cyclin A-associated protein in the endoplasmic reticulum | -1,576 | 0,420 | 2,645    | 1,043 | -1,511 | 1,309E-01 |
| CPIJ018515 Poly(P)/ATP NAD kinase                                        |                                                                  | -1,575 | 0,031 | 16,456   | 0,527 | -2,990 | 2,787E-03 |
| CPIJ017329 Brain tumor protein                                           |                                                                  | -1,573 | 0,406 | 3,059    | 1,015 | -1,549 | 1,213E-01 |
| CPIJ017386 proteasome subunit beta type 8 precursor                      |                                                                  | -1,571 | 0,012 | 26,548   | 0,470 | -3,342 | 8,307E-04 |
| CPIJ014522 lava lamp protein                                             |                                                                  | -1,570 | 0,000 | 93,194   | 0,288 | -5,445 | 5,184E-08 |
| CPIJ011728 Serine/threonine protein kinase                               |                                                                  | -1,568 | 0,190 | 6,646    | 0,737 | -2,128 | 3,334E-02 |
| CPIJ010601 N-terminal acetyltransferase A complex catalytic subunit ARD1 |                                                                  | -1,566 | 0,065 | 11,425   | 0,584 | -2,683 | 7,304E-03 |
| CPIJ005390 Putative uncharacterized protein                              | TP53-regulated inhibitor of apoptosis 1                          | -1,566 | 0,074 | 11,471   | 0,597 | -2,622 | 8,734E-03 |
| CPIJ015124 sterol carrier protein-2, putative                            |                                                                  | -1,558 | 0,000 | 1206,852 | 0,288 | -5,411 | 6,267E-08 |
| CPIJ002678 Glutathione transferase I                                     |                                                                  | -1,554 | 0,002 | 36,087   | 0,404 | -3,847 | 1,193E-04 |
| CPIJ004325 Gram-negative bacteria binding protein                        |                                                                  | -1,552 | 0,000 | 99,893   | 0,263 | -5,901 | 3,604E-09 |
| CPIJ010038 Putative uncharacterized protein                              |                                                                  | -1,544 | 0,362 | 3,401    | 0,934 | -1,654 | 9,816E-02 |
| CPIJ008877 prolylcarboxypeptidase, putative                              |                                                                  | -1,542 | 0,001 | 70,689   | 0,386 | -3,994 | 6,494E-05 |
| CPIJ018976 1-acylglycerol-3-phosphate acyltransferase, putative          |                                                                  | -1,539 | 0,154 | 7,114    | 0,684 | -2,250 | 2,442E-02 |
| CPIJ001897 Putative uncharacterized protein                              | MADF domain-containing protein                                   | -1,534 | 0,374 | 3,358    | 0,946 | -1,622 | 1,047E-01 |
| CPIJ005978 Putative uncharacterized protein                              |                                                                  | -1,530 | 0,366 | 3,290    | 0,932 | -1,642 | 1,005E-01 |
| CPIJ012182 Putative uncharacterized protein                              | CCAAT-binding factor domain-containing protein                   | -1,517 | 0,041 | 14,216   | 0,527 | -2,881 | 3,962E-03 |
| CPIJ001404 Voltage-gated ion channel                                     |                                                                  | -1,515 | 0,155 | 7,788    | 0,675 | -2,244 | 2,482E-02 |
| CPIJ017177 Utp14a protein                                                |                                                                  | -1,514 | 0,225 | 7,500    | 0,747 | -2,026 | 4,277E-02 |
| CPIJ013919 Xanthine dehydrogenase/oxidase                                |                                                                  | -1,508 | 0,000 | 843,774  | 0,279 | -5,415 | 6,123E-08 |
| CPIJ006512 Putative uncharacterized protein                              |                                                                  | -1,505 | 0,353 | 3,942    | 0,900 | -1,672 | 9,453E-02 |
| CPIJ013917 esterase B1 precursor                                         |                                                                  | -1,504 | 0,000 | 343,526  | 0,296 | -5,082 | 3,740E-07 |
| CPIJ008466 Putative uncharacterized protein                              | Chitin-binding type-2 domain-containing protein                  | -1,498 | 0,303 | 4,364    | 0,834 | -1,797 | 7,235E-02 |
| CPIJ011855 Putative uncharacterized protein                              | Golgi to ER traffic protein 4                                    | -1,493 | 0,258 | 5,333    | 0,780 | -1,913 | 5,573E-02 |
| CPIJ017390 cytosolic Fe-S cluster assembling factor CFD1                 |                                                                  | -1,491 | 0,100 | 9,907    | 0,602 | -2,477 | 1,325E-02 |
| CPIJ019233 Cerebral protein 1                                            |                                                                  | -1,477 | 0,187 | 7,578    | 0,691 | -2,137 | 3,260E-02 |
| CPIJ010179 Putative uncharacterized protein                              | Phospholipid/glycerol acyltransferase domain-containing protein  | -1,476 | 0,465 | 2,486    | 1,045 | -1,413 | 1,577E-01 |
| CPIJ018627 Glutathione S-transferase 1-1                                 |                                                                  | -1,475 | 0,000 | 255,764  | 0,227 | -6,492 | 8,445E-11 |
| CPIJ009429 Putative uncharacterized protein                              | ZZ-type domain-containing protein                                | -1,475 | 0,259 | 5,701    | 0,772 | -1,910 | 5,619E-02 |
| CPIJ000897 proteasome subunit alpha type 1                               |                                                                  | -1,466 | 0,005 | 31,078   | 0,402 | -3,645 | 2,675E-04 |
| CPIJ003580 cle7, putative                                                |                                                                  | -1,464 | 0,171 | 7,300    | 0,669 | -2,188 | 2,867E-02 |

|                                                                          |                                                 |        |       |         |       |        |           |
|--------------------------------------------------------------------------|-------------------------------------------------|--------|-------|---------|-------|--------|-----------|
| CPIJ007385 serine-type endopeptidase, putative                           |                                                 | -1,460 | 0,000 | 99,093  | 0,323 | -4,523 | 6,093E-06 |
| CPIJ017188 Putative uncharacterized protein                              | SecA family profile domain-containing protein   | -1,456 | 0,001 | 45,541  | 0,345 | -4,216 | 2,488E-05 |
| CPIJ017118 Putative uncharacterized protein                              | CHK kinase-like domain-containing protein       | -1,452 | 0,022 | 21,237  | 0,464 | -3,130 | 1,751E-03 |
| CPIJ002430 Cytidine deaminase                                            |                                                 | -1,449 | 0,000 | 63,254  | 0,311 | -4,653 | 3,277E-06 |
| CPIJ007196 Putative uncharacterized protein                              | Hypoxia up-regulated protein 1                  | -1,445 | 0,000 | 190,825 | 0,262 | -5,508 | 3,623E-08 |
| CPIJ003799 protein suppressor of forked                                  |                                                 | -1,444 | 0,079 | 12,676  | 0,557 | -2,592 | 9,545E-03 |
| CPIJ004746 Membralin                                                     |                                                 | -1,444 | 0,336 | 4,407   | 0,841 | -1,716 | 8,613E-02 |
| CPIJ000199 Putative uncharacterized protein                              |                                                 | -1,435 | 0,277 | 5,754   | 0,771 | -1,862 | 6,262E-02 |
| CPIJ016574 Geranylgeranyl transferase type-1 subunit beta                |                                                 | -1,433 | 0,050 | 15,870  | 0,512 | -2,796 | 5,171E-03 |
| CPIJ000418 Putative uncharacterized protein                              | J domain-containing protein                     | -1,431 | 0,149 | 9,627   | 0,630 | -2,271 | 2,313E-02 |
| CPIJ006930 gamma-glutamyl hydrolase, putative                            |                                                 | -1,428 | 0,000 | 50,150  | 0,318 | -4,487 | 7,225E-06 |
| CPIJ010187 Sodium/solute symporter                                       |                                                 | -1,428 | 0,226 | 6,987   | 0,707 | -2,020 | 4,334E-02 |
| CPIJ003678 U3 small nucleolar ribonucleoprotein protein IMP4             |                                                 | -1,427 | 0,232 | 6,252   | 0,715 | -1,994 | 4,611E-02 |
| CPIJ006359 Putative uncharacterized protein                              |                                                 | -1,423 | 0,004 | 35,501  | 0,383 | -3,718 | 2,009E-04 |
| CPIJ005818 13 kDa ribonucleoprotein-associated protein                   |                                                 | -1,422 | 0,041 | 30,179  | 0,494 | -2,878 | 4,008E-03 |
| CPIJ010781 secreted ferritin G subunit precursor, putative               |                                                 | -1,415 | 0,110 | 13,504  | 0,584 | -2,425 | 1,532E-02 |
| CPIJ011962 Multidrug resistance-associated protein 14                    |                                                 | -1,413 | 0,050 | 19,337  | 0,506 | -2,793 | 5,218E-03 |
| CPIJ007956 Putative uncharacterized protein                              | Chitin-binding type-2 domain-containing protein | -1,412 | 0,067 | 15,480  | 0,530 | -2,667 | 7,650E-03 |
| CPIJ002176 Phosphatidylserine synthase                                   |                                                 | -1,410 | 0,570 | 22,709  | 1,201 | -1,175 | 2,401E-01 |
| CPIJ009449 Putative uncharacterized protein                              | RING-type domain-containing protein             | -1,410 | 0,044 | 16,037  | 0,495 | -2,849 | 4,387E-03 |
| CPIJ005450 Lysozyme                                                      |                                                 | -1,408 | 0,394 | 4,164   | 0,894 | -1,575 | 1,152E-01 |
| CPIJ011381 serine-type endopeptidase, putative                           |                                                 | -1,401 | 0,000 | 196,555 | 0,313 | -4,471 | 7,785E-06 |
| CPIJ001717 aspartyl/glutamyl-tRNA(Asn/Gln) amidotransferase subunit B    |                                                 | -1,396 | 0,205 | 7,688   | 0,670 | -2,084 | 3,718E-02 |
| CPIJ003399 Peroxiredoxins, prx-1, prx-2, prx-3                           |                                                 | -1,396 | 0,009 | 47,463  | 0,405 | -3,449 | 5,620E-04 |
| CPIJ015151 adenylate cyclase, putative                                   |                                                 | -1,385 | 0,255 | 138,419 | 0,721 | -1,921 | 5,467E-02 |
| CPIJ009812 Xenotropic and polytropic murine leukemia virus receptor xpr1 |                                                 | -1,381 | 0,026 | 19,732  | 0,452 | -3,053 | 2,268E-03 |
| CPIJ004373 UDP-glucuronosyltransferase                                   |                                                 | -1,379 | 0,004 | 37,320  | 0,376 | -3,667 | 2,456E-04 |
| CPIJ011805 Putative uncharacterized protein                              |                                                 | -1,379 | 0,710 | 5,118   | 1,587 | -0,869 | 3,848E-01 |
| CPIJ015241 Alkaline phosphatase                                          |                                                 | -1,375 | 0,224 | 8,812   | 0,678 | -2,028 | 4,251E-02 |
| CPIJ008859 Putative uncharacterized protein                              | ER-bound oxygenase mpaB/mpaB'/Rubber oxygenase  | -1,374 | 0,000 | 162,254 | 0,257 | -5,353 | 8,635E-08 |
| CPIJ015556 RpS28: 40S ribosomal protein S28                              |                                                 | -1,373 | 0,398 | 45,041  | 0,875 | -1,568 | 1,168E-01 |
| CPIJ019364 apolipoprotein D, putative                                    |                                                 | -1,366 | 0,003 | 36,847  | 0,358 | -3,819 | 1,339E-04 |
| CPIJ006617 Putative uncharacterized protein                              | ascorbate ferrioreductase (transmembrane)       | -1,365 | 0,000 | 168,286 | 0,269 | -5,068 | 4,015E-07 |
| CPIJ012519 E3 ubiquitin-protein ligase RNF123                            |                                                 | -1,364 | 0,280 | 6,163   | 0,736 | -1,854 | 6,373E-02 |
| CPIJ015106 tonin precursor                                               |                                                 | -1,361 | 0,016 | 47,667  | 0,419 | -3,246 | 1,172E-03 |
| CPIJ005348 lipase 3 precursor                                            |                                                 | -1,358 | 0,038 | 18,232  | 0,466 | -2,916 | 3,550E-03 |
| CPIJ015650 Sulfotransferase 1A1                                          |                                                 | -1,355 | 0,022 | 24,043  | 0,435 | -3,114 | 1,846E-03 |
| CPIJ012313 RNA 3 terminal phosphate cyclase                              |                                                 | -1,352 | 0,192 | 8,081   | 0,638 | -2,121 | 3,396E-02 |



|                                                               |                                           |        |       |         |       |        |           |
|---------------------------------------------------------------|-------------------------------------------|--------|-------|---------|-------|--------|-----------|
| CPIJ001276 DEFA: defensin anti-microbial peptide              |                                           | -1,351 | 0,327 | 5,536   | 0,778 | -1,737 | 8,233E-02 |
| CPIJ001564 Selenide                                           |                                           | -1,351 | 0,010 | 52,682  | 0,398 | -3,391 | 6,974E-04 |
| CPIJ019996 Putative uncharacterized protein                   | Transmembrane protein 53                  | -1,345 | 0,050 | 23,209  | 0,481 | -2,796 | 5,170E-03 |
| CPIJ018694 Ion channel nomp                                   |                                           | -1,345 | 0,004 | 41,967  | 0,361 | -3,730 | 1,914E-04 |
| CPIJ009980 Eukaryotic translation initiation factor 4 gamma   |                                           | -1,338 | 0,060 | 26,460  | 0,493 | -2,715 | 6,629E-03 |
| CPIJ001856 Putative uncharacterized protein                   | Thioredoxin domain-containing protein     | -1,334 | 0,080 | 16,095  | 0,517 | -2,583 | 9,782E-03 |
| CPIJ016873 Gr15: gustatory receptor Gr15                      |                                           | -1,334 | 0,256 | 7,574   | 0,696 | -1,916 | 5,530E-02 |
| CPIJ013525 Putative uncharacterized protein                   | SNF2 N-terminal domain-containing protein | -1,332 | 0,001 | 45,904  | 0,322 | -4,140 | 3,479E-05 |
| CPIJ016541 Putative uncharacterized protein                   |                                           | -1,331 | 0,171 | 9,344   | 0,608 | -2,189 | 2,863E-02 |
| CPIJ002043 Translocon-associated protein, delta subunit       |                                           | -1,331 | 0,040 | 20,253  | 0,461 | -2,886 | 3,899E-03 |
| CPIJ004817 Sodium-dependent phosphate transporter             |                                           | -1,326 | 0,000 | 89,200  | 0,261 | -5,073 | 3,920E-07 |
| CPIJ001269 Thiamine transporter                               |                                           | -1,326 | 0,367 | 4,467   | 0,809 | -1,639 | 1,012E-01 |
| CPIJ009421 Nucleoporin NUP53                                  |                                           | -1,320 | 0,382 | 4,943   | 0,823 | -1,605 | 1,085E-01 |
| CPIJ004967 Uracil phosphoribosyltransferase                   |                                           | -1,320 | 0,421 | 3,573   | 0,876 | -1,507 | 1,317E-01 |
| CPIJ005468 Adenosine diphosphatase                            |                                           | -1,317 | 0,004 | 39,371  | 0,356 | -3,702 | 2,137E-04 |
| CPIJ016853 CYP6N21P: cytochrome P450 6N21P                    |                                           | -1,317 | 0,007 | 131,019 | 0,373 | -3,528 | 4,187E-04 |
| CPIJ003007 elongase, putative                                 |                                           | -1,316 | 0,027 | 22,753  | 0,432 | -3,048 | 2,305E-03 |
| CPIJ003587 Toys are us                                        |                                           | -1,315 | 0,172 | 9,346   | 0,601 | -2,187 | 2,873E-02 |
| CPIJ013322 Putative uncharacterized protein                   | Proteasome activator complex subunit 4    | -1,314 | 0,060 | 19,896  | 0,484 | -2,717 | 6,578E-03 |
| CPIJ003094 Putative uncharacterized protein                   | DUF4773 domain-containing protein         | -1,314 | 0,453 | 3,803   | 0,913 | -1,440 | 1,500E-01 |
| CPIJ016524 Putative uncharacterized protein                   | RING finger protein 141                   | -1,313 | 0,108 | 15,424  | 0,539 | -2,435 | 1,489E-02 |
| CPIJ016053 MICOS complex subunit MIC13                        |                                           | -1,311 | 0,371 | 4,773   | 0,805 | -1,628 | 1,036E-01 |
| CPIJ001739 Inosine triphosphate pyrophosphatase               |                                           | -1,310 | 0,324 | 6,081   | 0,750 | -1,746 | 8,075E-02 |
| CPIJ005699 n-acetylgalactosaminyltransferase                  |                                           | -1,308 | 0,046 | 18,994  | 0,462 | -2,832 | 4,630E-03 |
| CPIJ016849 CYP6M12: cytochrome P450 6M12                      |                                           | -1,308 | 0,205 | 141,446 | 0,629 | -2,081 | 3,741E-02 |
| CPIJ000675 Putative uncharacterized protein                   |                                           | -1,308 | 0,262 | 6,938   | 0,689 | -1,899 | 5,763E-02 |
| CPIJ003754 Putative uncharacterized protein                   | FIP-RBD domain-containing protein         | -1,305 | 0,054 | 16,871  | 0,473 | -2,760 | 5,783E-03 |
| CPIJ008246 Putative uncharacterized protein                   |                                           | -1,305 | 0,000 | 467,644 | 0,267 | -4,892 | 9,990E-07 |
| CPIJ015056 ubiquitin conjugating enzyme, putative             |                                           | -1,305 | 0,247 | 7,044   | 0,670 | -1,947 | 5,148E-02 |
| CPIJ011129 CYP6N25: cytochrome P450 6N25                      |                                           | -1,305 | 0,254 | 7,178   | 0,678 | -1,925 | 5,425E-02 |
| CPIJ019789 Putative uncharacterized protein                   |                                           | -1,302 | 0,000 | 87,789  | 0,300 | -4,334 | 1,462E-05 |
| CPIJ012821 Antimeros                                          |                                           | -1,299 | 0,161 | 9,726   | 0,584 | -2,223 | 2,621E-02 |
| CPIJ004492 sodium/potassium/calcium exchanger 3 precursor     |                                           | -1,295 | 0,014 | 36,636  | 0,393 | -3,293 | 9,901E-04 |
| CPIJ015538 endonuclease G, mitochondrial precursor            |                                           | -1,294 | 0,175 | 9,687   | 0,594 | -2,177 | 2,951E-02 |
| CPIJ013616 trypsin 5 precursor                                |                                           | -1,291 | 0,100 | 13,483  | 0,522 | -2,476 | 1,329E-02 |
| CPIJ017717 Putative uncharacterized protein                   |                                           | -1,291 | 0,000 | 862,121 | 0,281 | -4,600 | 4,230E-06 |
| CPIJ005306 Restin                                             |                                           | -1,289 | 0,417 | 4,340   | 0,847 | -1,522 | 1,279E-01 |
| CPIJ002523 Spermidine synthase                                |                                           | -1,286 | 0,023 | 26,767  | 0,415 | -3,103 | 1,917E-03 |
| CPIJ014045 39S ribosomal protein L32, mitochondrial precursor |                                           | -1,285 | 0,225 | 8,134   | 0,634 | -2,026 | 4,279E-02 |

|            |                                                              |                                                    |        |       |         |       |        |           |
|------------|--------------------------------------------------------------|----------------------------------------------------|--------|-------|---------|-------|--------|-----------|
| CPIJ015971 | 26S proteasome non-ATPase regulatory subunit 11              |                                                    | -1,275 | 0,018 | 28,797  | 0,398 | -3,202 | 1,364E-03 |
| CPIJ009045 | Putative uncharacterized protein                             | Fatty acid hydroxylase domain-containing protein   | -1,270 | 0,658 | 7,523   | 1,292 | -0,983 | 3,257E-01 |
| CPIJ011095 | TBC1 domain family member 5                                  |                                                    | -1,268 | 0,494 | 2,982   | 0,942 | -1,347 | 1,780E-01 |
| CPIJ019561 | ADP-ribosylation factor, arf                                 |                                                    | -1,267 | 0,431 | 3,909   | 0,852 | -1,488 | 1,369E-01 |
| CPIJ014557 | Nitrilase and fragile histidine triad fusion protein NitFhit |                                                    | -1,266 | 0,093 | 14,492  | 0,504 | -2,513 | 1,198E-02 |
| CPIJ004838 | 26S proteasome non-ATPase regulatory subunit 3               |                                                    | -1,265 | 0,033 | 25,404  | 0,426 | -2,966 | 3,013E-03 |
| CPIJ001654 | n-acetylgalactosaminyltransferase, putative                  |                                                    | -1,257 | 0,388 | 4,675   | 0,791 | -1,589 | 1,120E-01 |
| CPIJ008588 | mRNA turnover protein 4                                      |                                                    | -1,256 | 0,028 | 28,353  | 0,415 | -3,028 | 2,464E-03 |
| CPIJ007308 | Putative uncharacterized protein                             | Plexus                                             | -1,255 | 0,230 | 8,361   | 0,625 | -2,007 | 4,471E-02 |
| CPIJ006965 | Putative uncharacterized protein                             | Protein takeout                                    | -1,255 | 0,261 | 8,118   | 0,659 | -1,905 | 5,679E-02 |
| CPIJ002762 | mediator complex, subunit, putative                          |                                                    | -1,251 | 0,417 | 4,174   | 0,821 | -1,524 | 1,276E-01 |
| CPIJ002022 | leucine rich protein, putative                               |                                                    | -1,249 | 0,414 | 4,114   | 0,815 | -1,533 | 1,253E-01 |
| CPIJ007524 | Putative uncharacterized protein                             | Gamma-interferon inducible lysosomal thiol reduc   | -1,245 | 0,001 | 166,547 | 0,295 | -4,220 | 2,440E-05 |
| CPIJ015753 | Putative uncharacterized protein                             | Transmembrane protein 87A                          | -1,245 | 0,302 | 6,777   | 0,691 | -1,800 | 7,188E-02 |
| CPIJ004176 | Putative uncharacterized protein                             | Phosphatidylinositol-glycan biosynthesis class X p | -1,242 | 0,385 | 5,354   | 0,778 | -1,596 | 1,104E-01 |
| CPIJ002233 | Sphingomyelin synthetase                                     |                                                    | -1,238 | 0,211 | 9,499   | 0,600 | -2,065 | 3,891E-02 |
| CPIJ008983 | ATP-dependent RNA helicase DBP8                              |                                                    | -1,237 | 0,375 | 5,240   | 0,763 | -1,621 | 1,051E-01 |
| CPIJ005158 | Putative uncharacterized protein                             | Vesicle transport protein SEC20                    | -1,237 | 0,433 | 4,312   | 0,834 | -1,482 | 1,383E-01 |
| CPIJ019405 | p15-2a protein, putative                                     |                                                    | -1,235 | 0,205 | 9,230   | 0,593 | -2,084 | 3,720E-02 |
| CPIJ002416 | NIK and IKK{beta} binding protein                            |                                                    | -1,235 | 0,451 | 4,470   | 0,856 | -1,443 | 1,491E-01 |
| CPIJ016922 | Farnesol dehydrogenase                                       |                                                    | -1,230 | 0,029 | 43,394  | 0,409 | -3,011 | 2,606E-03 |
| CPIJ010526 | CysteinyI-tRNA synthetase                                    |                                                    | -1,230 | 0,078 | 23,371  | 0,473 | -2,600 | 9,332E-03 |
| CPIJ019125 | ATP-binding cassette sub-family G member 4                   |                                                    | -1,230 | 0,015 | 52,815  | 0,376 | -3,267 | 1,087E-03 |
| CPIJ009452 | Monocarboxylate transporter                                  |                                                    | -1,226 | 0,255 | 7,898   | 0,639 | -1,920 | 5,488E-02 |
| CPIJ010195 | Putative uncharacterized protein                             | Serum response factor-binding protein 1            | -1,224 | 0,346 | 6,168   | 0,725 | -1,689 | 9,118E-02 |
| CPIJ011856 | E3 ubiquitin-protein ligase MARCH5                           |                                                    | -1,223 | 0,066 | 21,503  | 0,457 | -2,674 | 7,506E-03 |
| CPIJ004204 | J protein type 1                                             |                                                    | -1,222 | 0,230 | 8,944   | 0,610 | -2,005 | 4,497E-02 |
| CPIJ011127 | CYP4H34: cytochrome P450 4H34                                |                                                    | -1,220 | 0,003 | 139,823 | 0,326 | -3,744 | 1,811E-04 |
| CPIJ000615 | clip-domain serine protease, putative                        |                                                    | -1,220 | 0,230 | 9,294   | 0,609 | -2,003 | 4,523E-02 |
| CPIJ013654 | Putative uncharacterized protein                             | Synaptobrevin homolog YKT6                         | -1,219 | 0,517 | 2,934   | 0,944 | -1,291 | 1,966E-01 |
| CPIJ005438 | exocyst complex component 6                                  |                                                    | -1,218 | 0,026 | 25,828  | 0,399 | -3,050 | 2,289E-03 |
| CPIJ012085 | SF21                                                         |                                                    | -1,217 | 0,020 | 31,862  | 0,386 | -3,148 | 1,644E-03 |
| CPIJ018614 | Malate dehydrogenase                                         |                                                    | -1,216 | 0,384 | 5,032   | 0,760 | -1,599 | 1,099E-01 |
| CPIJ010890 | Phosphatidylinositol glycan anchor biosynthesis              |                                                    | -1,215 | 0,210 | 10,021  | 0,587 | -2,068 | 3,860E-02 |
| CPIJ009247 | E3 ubiquitin-protein ligase sina                             |                                                    | -1,213 | 0,329 | 6,356   | 0,700 | -1,732 | 8,327E-02 |
| CPIJ017472 | Organic cation transporter                                   |                                                    | -1,213 | 0,034 | 25,891  | 0,410 | -2,961 | 3,065E-03 |
| CPIJ007554 | Actin                                                        |                                                    | -1,212 | 0,362 | 5,480   | 0,733 | -1,653 | 9,836E-02 |
| CPIJ000881 | Putative uncharacterized protein                             |                                                    | -1,212 | 0,000 | 123,961 | 0,237 | -5,110 | 3,230E-07 |

|            |                                                                |                                                  |        |       |         |       |        |           |
|------------|----------------------------------------------------------------|--------------------------------------------------|--------|-------|---------|-------|--------|-----------|
| CPIJ009789 | Putative uncharacterized protein                               |                                                  | -1,209 | 0,365 | 6,457   | 0,735 | -1,646 | 9,969E-02 |
| CPIJ017540 | Coatomer subunit delta                                         |                                                  | -1,208 | 0,048 | 28,890  | 0,429 | -2,814 | 4,894E-03 |
| CPIJ008046 | Putative uncharacterized protein                               |                                                  | -1,207 | 0,264 | 8,153   | 0,638 | -1,894 | 5,826E-02 |
| CPIJ002068 | Uncharacterized protein (Fragment)                             | Queuosine 5'-phosphate N-glycosylase/hydrolase   | -1,206 | 0,001 | 75,861  | 0,284 | -4,253 | 2,112E-05 |
| CPIJ018160 | Lipid storage droplets surface binding protein 2               |                                                  | -1,204 | 0,003 | 86,934  | 0,320 | -3,758 | 1,710E-04 |
| CPIJ012341 | Malic enzyme                                                   |                                                  | -1,202 | 0,000 | 133,373 | 0,280 | -4,297 | 1,727E-05 |
| CPIJ003395 | Reductase protein                                              |                                                  | -1,199 | 0,000 | 246,443 | 0,213 | -5,638 | 1,725E-08 |
| CPIJ007348 | Nuclear movement protein nudC                                  |                                                  | -1,199 | 0,231 | 9,699   | 0,600 | -1,998 | 4,574E-02 |
| CPIJ001089 | lactosylceramide 4-alpha-galactosyltransferase, putative       |                                                  | -1,196 | 0,195 | 11,728  | 0,566 | -2,114 | 3,454E-02 |
| CPIJ013082 | Chitinase                                                      |                                                  | -1,194 | 0,187 | 13,149  | 0,558 | -2,138 | 3,250E-02 |
| CPIJ009639 | single-stranded DNA-binding protein, mitochondrial precursor   |                                                  | -1,193 | 0,419 | 4,684   | 0,789 | -1,513 | 1,302E-01 |
| CPIJ010599 | Exonuclease nef-sp                                             |                                                  | -1,193 | 0,230 | 9,163   | 0,595 | -2,004 | 4,508E-02 |
| CPIJ004062 | Putative uncharacterized protein                               | Protein UXT                                      | -1,193 | 0,341 | 6,867   | 0,701 | -1,703 | 8,864E-02 |
| CPIJ004351 | Zinc finger protein 92                                         |                                                  | -1,192 | 0,220 | 9,471   | 0,585 | -2,038 | 4,156E-02 |
| CPIJ002726 | lipase 3 precursor                                             |                                                  | -1,188 | 0,675 | 12,139  | 1,256 | -0,945 | 3,445E-01 |
| CPIJ013727 | Ad-003                                                         |                                                  | -1,188 | 0,388 | 5,073   | 0,747 | -1,589 | 1,120E-01 |
| CPIJ014272 | Putative uncharacterized protein                               | Dolichyl-diphosphooligosaccharide--protein glyco | -1,188 | 0,167 | 12,384  | 0,539 | -2,205 | 2,745E-02 |
| CPIJ004078 | WD repeat protein 36                                           |                                                  | -1,183 | 0,230 | 9,106   | 0,591 | -2,002 | 4,532E-02 |
| CPIJ016097 | Peroxisomal membrane protein 70 abcd3                          |                                                  | -1,182 | 0,031 | 52,058  | 0,395 | -2,990 | 2,793E-03 |
| CPIJ005246 | Abhydrolase domain-containing protein 7                        |                                                  | -1,181 | 0,516 | 3,433   | 0,913 | -1,294 | 1,957E-01 |
| CPIJ002181 | Endoplasmic reticulum-Golgi intermediate compartment protein 3 |                                                  | -1,176 | 0,374 | 5,572   | 0,725 | -1,622 | 1,049E-01 |
| CPIJ008811 | Putative uncharacterized protein                               | BEACH domain-containing protein                  | -1,174 | 0,424 | 4,567   | 0,783 | -1,499 | 1,338E-01 |
| CPIJ004923 | Putative uncharacterized protein                               | Thiamine transporter 1                           | -1,172 | 0,154 | 13,154  | 0,520 | -2,252 | 2,433E-02 |
| CPIJ004201 | Mevalonate kinase                                              |                                                  | -1,170 | 0,143 | 13,311  | 0,509 | -2,298 | 2,156E-02 |
| CPIJ004056 | Uncharacterized protein (Fragment)                             |                                                  | -1,170 | 0,531 | 3,078   | 0,928 | -1,260 | 2,075E-01 |
| CPIJ002337 | Ribonucleoside-diphosphate reductase small chain               |                                                  | -1,169 | 0,025 | 29,880  | 0,381 | -3,069 | 2,150E-03 |
| CPIJ004141 | 1-acyl-sn-glycerol-3-phosphate acyltransferase beta            |                                                  | -1,167 | 0,001 | 67,808  | 0,280 | -4,174 | 2,992E-05 |
| CPIJ017966 | Putative uncharacterized protein                               | Stambha A                                        | -1,165 | 0,007 | 52,483  | 0,331 | -3,516 | 4,380E-04 |
| CPIJ005508 | DNA-J/hsp40                                                    |                                                  | -1,165 | 0,001 | 95,438  | 0,274 | -4,260 | 2,043E-05 |
| CPIJ003082 | CYP9J42: cytochrome P450 9J42                                  |                                                  | -1,165 | 0,000 | 565,602 | 0,265 | -4,402 | 1,073E-05 |
| CPIJ001233 | Putative uncharacterized protein                               |                                                  | -1,164 | 0,441 | 4,698   | 0,793 | -1,466 | 1,425E-01 |
| CPIJ011373 | Putative uncharacterized protein                               | PNPLA domain-containing protein                  | -1,162 | 0,000 | 107,006 | 0,267 | -4,355 | 1,333E-05 |
| CPIJ009698 | Putative uncharacterized protein                               | SLC41A/MgtE integral membrane domain-contain     | -1,162 | 0,046 | 23,211  | 0,412 | -2,824 | 4,741E-03 |
| CPIJ014050 | Predicted protein                                              |                                                  | -1,159 | 0,035 | 31,280  | 0,394 | -2,941 | 3,270E-03 |
| CPIJ016728 | Putative uncharacterized protein                               |                                                  | -1,159 | 0,104 | 15,827  | 0,472 | -2,453 | 1,417E-02 |
| CPIJ009629 | Zinc finger X-linked protein ZXDA                              |                                                  | -1,158 | 0,302 | 8,421   | 0,644 | -1,799 | 7,197E-02 |
| CPIJ008889 | 60 kDa heat shock protein, mitochondrial precursor             |                                                  | -1,158 | 0,417 | 43,500  | 0,762 | -1,521 | 1,283E-01 |
| CPIJ019363 | chitinase domain-containing protein 1 precursor                |                                                  | -1,154 | 0,002 | 85,929  | 0,298 | -3,875 | 1,065E-04 |

|                                                                     |                                        |        |       |          |       |        |           |
|---------------------------------------------------------------------|----------------------------------------|--------|-------|----------|-------|--------|-----------|
| CPIJ012675 Sugar transporter                                        |                                        | -1,152 | 0,004 | 72,945   | 0,314 | -3,674 | 2,388E-04 |
| CPIJ002197 Lysine-specific histone demethylase 1                    |                                        | -1,152 | 0,288 | 7,967    | 0,627 | -1,836 | 6,630E-02 |
| CPIJ006932 Ebna2 binding protein P100                               |                                        | -1,150 | 0,022 | 109,334  | 0,368 | -3,126 | 1,772E-03 |
| CPIJ003821 Sel1l protein                                            |                                        | -1,145 | 0,001 | 127,036  | 0,275 | -4,167 | 3,089E-05 |
| CPIJ011412 M-phase phosphoprotein 11                                |                                        | -1,144 | 0,092 | 21,738   | 0,454 | -2,519 | 1,175E-02 |
| CPIJ005011 Putative uncharacterized protein                         | BUD13 homolog                          | -1,141 | 0,475 | 3,871    | 0,825 | -1,384 | 1,663E-01 |
| CPIJ005483 Putative uncharacterized protein                         | EGF-like domain-containing protein     | -1,141 | 0,188 | 16,107   | 0,535 | -2,134 | 3,284E-02 |
| CPIJ019900 Inositol-1-monophosphatase                               |                                        | -1,136 | 0,302 | 9,152    | 0,631 | -1,802 | 7,162E-02 |
| CPIJ013918 esterase B1 precursor                                    |                                        | -1,134 | 0,000 | 1156,576 | 0,210 | -5,395 | 6,859E-08 |
| CPIJ009064 Abhydrolase domain-containing protein 4                  |                                        | -1,132 | 0,052 | 43,994   | 0,407 | -2,779 | 5,456E-03 |
| CPIJ010981 Secretion-regulating guanine nucleotide exchange factor  |                                        | -1,132 | 0,503 | 3,915    | 0,852 | -1,329 | 1,837E-01 |
| CPIJ016649 UBX domain-containing protein 8                          |                                        | -1,132 | 0,167 | 13,132   | 0,514 | -2,202 | 2,770E-02 |
| CPIJ013568 Exosome complex exonuclease RRP43                        |                                        | -1,132 | 0,453 | 4,553    | 0,786 | -1,439 | 1,501E-01 |
| CPIJ017623 Tetratricopeptide repeat protein 1                       |                                        | -1,128 | 0,469 | 4,119    | 0,805 | -1,401 | 1,613E-01 |
| CPIJ015379 Putative uncharacterized protein                         | Pseudouridine-5'-phosphate glycosidase | -1,127 | 0,302 | 8,660    | 0,626 | -1,800 | 7,192E-02 |
| CPIJ015252 Zinc carboxypeptidase                                    |                                        | -1,124 | 0,067 | 20,987   | 0,421 | -2,669 | 7,616E-03 |
| CPIJ004646 UDP-galactose transporter                                |                                        | -1,123 | 0,048 | 28,646   | 0,400 | -2,810 | 4,961E-03 |
| CPIJ016406 protein-L-isoaspartate(D-aspartate) O-methyltransferase  |                                        | -1,122 | 0,379 | 6,331    | 0,696 | -1,611 | 1,072E-01 |
| CPIJ005083 Pre-mRNA-splicing factor 18                              |                                        | -1,121 | 0,524 | 3,398    | 0,878 | -1,278 | 2,014E-01 |
| CPIJ017711 Putative uncharacterized protein                         | Cytochrome c oxidase assembly factor 6 | -1,119 | 0,329 | 7,517    | 0,648 | -1,728 | 8,394E-02 |
| CPIJ002702 Adenylosuccinate lyase                                   |                                        | -1,119 | 0,392 | 5,940    | 0,707 | -1,582 | 1,136E-01 |
| CPIJ001623 sorting nexin, putative                                  |                                        | -1,118 | 0,228 | 10,852   | 0,555 | -2,016 | 4,379E-02 |
| CPIJ015911 Putative uncharacterized protein                         |                                        | -1,117 | 0,187 | 14,763   | 0,523 | -2,138 | 3,254E-02 |
| CPIJ003555 Cbp20: Nuclear cap-binding protein subunit 2             |                                        | -1,115 | 0,283 | 9,338    | 0,604 | -1,845 | 6,498E-02 |
| CPIJ010271 Putative uncharacterized protein                         | C2H2-type domain-containing protein    | -1,114 | 0,241 | 11,873   | 0,567 | -1,966 | 4,924E-02 |
| CPIJ005485 Thiamin pyrophosphokinase                                |                                        | -1,113 | 0,146 | 16,867   | 0,487 | -2,286 | 2,225E-02 |
| CPIJ014894 Putative uncharacterized protein                         | Protein CUSTOS                         | -1,113 | 0,389 | 5,889    | 0,701 | -1,587 | 1,125E-01 |
| CPIJ007327 protein disulfide-isomerase A6 precursor                 |                                        | -1,112 | 0,006 | 267,890  | 0,309 | -3,594 | 3,252E-04 |
| CPIJ008659 metalloproteinase, putative                              |                                        | -1,108 | 0,155 | 18,414   | 0,494 | -2,245 | 2,475E-02 |
| CPIJ011635 N-acetylglucosaminyl-phosphatidylinositol de-N-acetylase |                                        | -1,107 | 0,557 | 3,184    | 0,921 | -1,201 | 2,296E-01 |
| CPIJ006347 actin binding protein, putative                          |                                        | -1,105 | 0,048 | 37,566   | 0,393 | -2,810 | 4,960E-03 |
| CPIJ000406 CMP-sialic acid transporter                              |                                        | -1,105 | 0,241 | 11,913   | 0,563 | -1,964 | 4,954E-02 |
| CPIJ006730 ATP-dependent RNA helicase DDX55                         |                                        | -1,105 | 0,148 | 14,730   | 0,485 | -2,279 | 2,267E-02 |
| CPIJ005510 Putative uncharacterized protein                         | rRNA-processing protein UTP23          | -1,105 | 0,529 | 3,490    | 0,871 | -1,268 | 2,047E-01 |
| CPIJ000337 isocitrate dehydrogenase cytoplasmic                     |                                        | -1,104 | 0,000 | 535,176  | 0,201 | -5,501 | 3,777E-08 |
| CPIJ001391 Putative uncharacterized protein                         |                                        | -1,103 | 0,323 | 7,942    | 0,631 | -1,750 | 8,014E-02 |
| CPIJ008456 Cystinosin                                               |                                        | -1,102 | 0,000 | 412,156  | 0,197 | -5,591 | 2,259E-08 |
| CPIJ008904 alpha-glucosidase, putative                              |                                        | -1,101 | 0,001 | 179,201  | 0,257 | -4,276 | 1,904E-05 |

|            |                                                            |                                               |        |       |         |       |        |           |
|------------|------------------------------------------------------------|-----------------------------------------------|--------|-------|---------|-------|--------|-----------|
| CPIJ011770 | Uncharacterized protein (Fragment)                         |                                               | -1,099 | 0,343 | 8,638   | 0,647 | -1,699 | 8,940E-02 |
| CPIJ003929 | Alpha-1,3-mannosyl-glycoprotein beta-1                     |                                               | -1,099 | 0,013 | 42,237  | 0,332 | -3,309 | 9,361E-04 |
| CPIJ002036 | Transmembrane and TPR repeat-containing protein            |                                               | -1,095 | 0,288 | 8,543   | 0,597 | -1,834 | 6,661E-02 |
| CPIJ011443 | diphosphoinositol polyphosphate phosphohydrolase, putative |                                               | -1,094 | 0,289 | 8,818   | 0,597 | -1,833 | 6,674E-02 |
| CPIJ015795 | Putative uncharacterized protein                           |                                               | -1,094 | 0,329 | 7,998   | 0,633 | -1,729 | 8,377E-02 |
| CPIJ010328 | 39S ribosomal protein L51, mitochondrial precursor         |                                               | -1,093 | 0,316 | 10,510  | 0,618 | -1,770 | 7,678E-02 |
| CPIJ020221 | ferritin subunit, putative                                 |                                               | -1,092 | 0,388 | 6,340   | 0,686 | -1,591 | 1,117E-01 |
| CPIJ016387 | Putative uncharacterized protein                           |                                               | -1,091 | 0,064 | 23,881  | 0,405 | -2,693 | 7,088E-03 |
| CPIJ003976 | gar2, putative                                             |                                               | -1,091 | 0,065 | 24,340  | 0,406 | -2,685 | 7,247E-03 |
| CPIJ005943 | Putative uncharacterized protein                           | Condensin-2 complex subunit H2 C-terminal dom | -1,090 | 0,376 | 6,625   | 0,674 | -1,617 | 1,060E-01 |
| CPIJ018539 | Wd-repeat protein                                          |                                               | -1,089 | 0,132 | 17,298  | 0,466 | -2,338 | 1,937E-02 |
| CPIJ016357 | Putative uncharacterized protein                           | Methyltransferase domain-containing protein   | -1,089 | 0,421 | 5,492   | 0,722 | -1,509 | 1,314E-01 |
| CPIJ007629 | splicing factor, putative                                  |                                               | -1,088 | 0,075 | 42,653  | 0,416 | -2,618 | 8,835E-03 |
| CPIJ015227 | acetyl-coa acetyltransferase 2, putative                   |                                               | -1,087 | 0,220 | 14,910  | 0,533 | -2,041 | 4,125E-02 |
| CPIJ014539 | U2-associated SR140 protein                                |                                               | -1,087 | 0,352 | 7,062   | 0,649 | -1,675 | 9,398E-02 |
| CPIJ000212 | Putative uncharacterized protein                           |                                               | -1,086 | 0,461 | 5,507   | 0,764 | -1,422 | 1,551E-01 |
| CPIJ003064 | Ribosomal protein S6 kinase                                |                                               | -1,085 | 0,230 | 11,370  | 0,542 | -2,004 | 4,511E-02 |
| CPIJ011328 | GTP:AMP phosphotransferase mitochondrial                   |                                               | -1,083 | 0,121 | 26,213  | 0,455 | -2,380 | 1,732E-02 |
| CPIJ003818 | Putative uncharacterized protein                           | VWFA domain-containing protein                | -1,082 | 0,002 | 80,581  | 0,276 | -3,926 | 8,623E-05 |
| CPIJ010146 | Putative uncharacterized protein                           | VWFA domain-containing protein                | -1,079 | 0,236 | 14,049  | 0,544 | -1,984 | 4,730E-02 |
| CPIJ005821 | Multi-sex-combs                                            |                                               | -1,077 | 0,482 | 4,308   | 0,787 | -1,369 | 1,711E-01 |
| CPIJ017699 | arginyl-tRNA-protein transferase 1                         |                                               | -1,075 | 0,532 | 3,810   | 0,856 | -1,255 | 2,096E-01 |
| CPIJ009388 | Thermosome subunit alpha                                   |                                               | -1,074 | 0,011 | 62,717  | 0,318 | -3,381 | 7,226E-04 |
| CPIJ005168 | dolichyl-diphosphooligosaccharide protein glycotransferase |                                               | -1,072 | 0,110 | 38,717  | 0,442 | -2,424 | 1,534E-02 |
| CPIJ013731 | Putative uncharacterized protein                           |                                               | -1,072 | 0,187 | 14,034  | 0,501 | -2,138 | 3,249E-02 |
| CPIJ004362 | Lethal 87Df                                                |                                               | -1,072 | 0,324 | 10,172  | 0,613 | -1,748 | 8,052E-02 |
| CPIJ001702 | Putative uncharacterized protein                           |                                               | -1,071 | 0,595 | 2,730   | 0,954 | -1,122 | 2,618E-01 |
| CPIJ007179 | Prosalpha4: 26S proteasome alpha 4 subunit                 |                                               | -1,069 | 0,028 | 44,629  | 0,353 | -3,029 | 2,452E-03 |
| CPIJ003835 | Putative uncharacterized protein                           | Vitellogenin domain-containing protein        | -1,068 | 0,382 | 7,024   | 0,666 | -1,605 | 1,085E-01 |
| CPIJ004832 | loqs: loquacious                                           |                                               | -1,068 | 0,082 | 28,335  | 0,415 | -2,573 | 1,009E-02 |
| CPIJ003870 | acyl-CoA oxidase                                           |                                               | -1,065 | 0,318 | 9,692   | 0,603 | -1,765 | 7,751E-02 |
| CPIJ010544 | CYP9J33: cytochrome P450 9J33                              |                                               | -1,064 | 0,000 | 739,701 | 0,239 | -4,460 | 8,210E-06 |
| CPIJ000540 | Putative uncharacterized protein                           | Neuroguidin                                   | -1,063 | 0,359 | 7,919   | 0,640 | -1,660 | 9,688E-02 |
| CPIJ012907 | Luciferin 4-monooxygenase                                  |                                               | -1,061 | 0,000 | 248,832 | 0,234 | -4,530 | 5,912E-06 |
| CPIJ010578 | Putative uncharacterized protein                           | C2H2-type domain-containing protein           | -1,061 | 0,229 | 13,691  | 0,527 | -2,012 | 4,427E-02 |
| CPIJ003364 | Splicing factor 3A subunit 2                               |                                               | -1,059 | 0,364 | 7,208   | 0,642 | -1,650 | 9,892E-02 |
| CPIJ000670 | 24-dehydrocholesterol reductase precursor                  |                                               | -1,058 | 0,000 | 768,590 | 0,216 | -4,907 | 9,245E-07 |
| CPIJ002829 | Arsenite-resistance protein                                |                                               | -1,058 | 0,240 | 12,967  | 0,537 | -1,969 | 4,890E-02 |

|                                                                    |                                                    |        |       |         |       |        |           |
|--------------------------------------------------------------------|----------------------------------------------------|--------|-------|---------|-------|--------|-----------|
| CPIJ000204 Putative uncharacterized protein                        | Folliculin                                         | -1,055 | 0,455 | 5,764   | 0,735 | -1,435 | 1,514E-01 |
| CPIJ003176 Putative uncharacterized protein                        |                                                    | -1,053 | 0,203 | 13,968  | 0,504 | -2,090 | 3,665E-02 |
| CPIJ009807 Bhlhzip transcription factor bigmax                     |                                                    | -1,051 | 0,274 | 14,055  | 0,561 | -1,873 | 6,103E-02 |
| CPIJ007435 Putative uncharacterized protein                        | Major facilitator superfamily (MFS) profile domain | -1,050 | 0,155 | 17,445  | 0,468 | -2,246 | 2,468E-02 |
| CPIJ013683 Peroxisomal membrane protein PEX16                      |                                                    | -1,050 | 0,328 | 9,686   | 0,606 | -1,734 | 8,292E-02 |
| CPIJ016096 Ciao1: protein CIAO1                                    |                                                    | -1,049 | 0,291 | 10,563  | 0,575 | -1,826 | 6,792E-02 |
| CPIJ014396 Putative uncharacterized protein                        | RAP domain-containing protein                      | -1,048 | 0,094 | 24,328  | 0,418 | -2,506 | 1,222E-02 |
| CPIJ015036 Syntaxin                                                |                                                    | -1,047 | 0,269 | 10,927  | 0,556 | -1,883 | 5,967E-02 |
| CPIJ014673 Putative uncharacterized protein                        | CRAL-TRIO domain-containing protein                | -1,047 | 0,132 | 18,696  | 0,448 | -2,336 | 1,951E-02 |
| CPIJ018143 Putative uncharacterized protein                        |                                                    | -1,046 | 0,369 | 7,201   | 0,641 | -1,634 | 1,023E-01 |
| CPIJ015682 Translation initiation factor if-2                      |                                                    | -1,045 | 0,140 | 23,881  | 0,453 | -2,306 | 2,112E-02 |
| CPIJ008924 phospholipid-transporting atpase 1                      |                                                    | -1,044 | 0,554 | 3,532   | 0,865 | -1,207 | 2,276E-01 |
| CPIJ004664 Putative uncharacterized protein                        | 6-phosphofructo-2-kinase domain-containing protein | -1,042 | 0,040 | 40,672  | 0,360 | -2,899 | 3,747E-03 |
| CPIJ007234 AdoMet-dependent rRNA methyltransferase spb1            |                                                    | -1,042 | 0,024 | 46,880  | 0,337 | -3,089 | 2,006E-03 |
| CPIJ003550 78 kDa glucose-regulated protein precursor              |                                                    | -1,040 | 0,004 | 677,607 | 0,281 | -3,702 | 2,141E-04 |
| CPIJ014686 Putative uncharacterized protein                        | Ubiquitin carboxyl-terminal hydrolase 14           | -1,037 | 0,133 | 19,279  | 0,445 | -2,331 | 1,977E-02 |
| CPIJ014052 Glutathione-s-transferase theta, gst                    |                                                    | -1,036 | 0,000 | 170,741 | 0,230 | -4,502 | 6,741E-06 |
| CPIJ008347 Phosphatidylserine decarboxylase                        |                                                    | -1,035 | 0,120 | 21,638  | 0,434 | -2,387 | 1,701E-02 |
| CPIJ013504 DHX9 protein                                            |                                                    | -1,035 | 0,509 | 4,574   | 0,790 | -1,311 | 1,900E-01 |
| CPIJ004472 Putative uncharacterized protein                        | 26S proteasome non-ATPase regulatory subunit 5     | -1,034 | 0,391 | 7,666   | 0,653 | -1,584 | 1,132E-01 |
| CPIJ006688 kinesin heavy chain subunit                             |                                                    | -1,033 | 0,206 | 21,476  | 0,497 | -2,078 | 3,771E-02 |
| CPIJ001314 WD repeat protein 46                                    |                                                    | -1,032 | 0,185 | 16,153  | 0,481 | -2,147 | 3,176E-02 |
| CPIJ001891 Putative uncharacterized protein                        | CCHC-type domain-containing protein                | -1,032 | 0,000 | 288,242 | 0,207 | -4,993 | 5,940E-07 |
| CPIJ008623 Flotillin-1                                             |                                                    | -1,030 | 0,035 | 33,738  | 0,350 | -2,945 | 3,232E-03 |
| CPIJ006316 Putative uncharacterized protein                        | Interferon-related developmental regulator 1       | -1,030 | 0,197 | 19,389  | 0,489 | -2,107 | 3,510E-02 |
| CPIJ005611 Tumor suppressor candidate 3                            |                                                    | -1,028 | 0,002 | 104,371 | 0,264 | -3,889 | 1,009E-04 |
| CPIJ015882 Putative uncharacterized protein                        | RRM domain-containing protein                      | -1,028 | 0,054 | 57,118  | 0,372 | -2,761 | 5,769E-03 |
| CPIJ010693 Uroporphyrinogen decarboxylase                          |                                                    | -1,024 | 0,060 | 38,683  | 0,377 | -2,716 | 6,607E-03 |
| CPIJ009793 Glioma tumor suppressor candidate region gene 2 protein |                                                    | -1,024 | 0,166 | 22,597  | 0,463 | -2,211 | 2,705E-02 |
| CPIJ006728 Putative uncharacterized protein                        | Methyltransferase-like protein 23                  | -1,024 | 0,136 | 18,602  | 0,441 | -2,321 | 2,031E-02 |
| CPIJ002605 protein serine/threonine kinase, putative               |                                                    | -1,023 | 0,263 | 13,052  | 0,540 | -1,895 | 5,812E-02 |
| CPIJ007439 Putative uncharacterized protein                        | RRM domain-containing protein                      | -1,022 | 0,456 | 5,982   | 0,713 | -1,433 | 1,517E-01 |
| CPIJ011778 Transcription initiation factor TFIID subunit 12        |                                                    | -1,022 | 0,450 | 5,576   | 0,707 | -1,446 | 1,481E-01 |
| CPIJ011687 Inosine-5-monophosphate dehydrogenase                   |                                                    | -1,022 | 0,239 | 14,608  | 0,518 | -1,971 | 4,871E-02 |
| CPIJ018235 Prefoldin subunit 5                                     |                                                    | -1,022 | 0,104 | 21,949  | 0,416 | -2,454 | 1,413E-02 |
| CPIJ015642 ATP-dependent RNA helicase Ddx1                         |                                                    | -1,020 | 0,234 | 12,718  | 0,512 | -1,992 | 4,641E-02 |
| CPIJ008447 Amine oxidase                                           |                                                    | -1,020 | 0,034 | 37,078  | 0,345 | -2,954 | 3,139E-03 |
| CPIJ006618 Putative uncharacterized protein                        | PLAC domain-containing protein                     | -1,019 | 0,413 | 6,921   | 0,663 | -1,537 | 1,242E-01 |



|            |                                                              |                                                 |        |       |          |       |        |           |
|------------|--------------------------------------------------------------|-------------------------------------------------|--------|-------|----------|-------|--------|-----------|
| CPIJ012839 | 1-acylglycerol-3-phosphate acyltransferase, putative         |                                                 | -1,018 | 0,106 | 22,968   | 0,417 | -2,444 | 1,452E-02 |
| CPIJ019470 | 3-demethylubiquinone-9 3-methyltransferase                   |                                                 | -1,018 | 0,018 | 93,977   | 0,318 | -3,198 | 1,384E-03 |
| CPIJ001467 | Putative uncharacterized protein                             |                                                 | -1,015 | 0,524 | 4,439    | 0,794 | -1,278 | 2,012E-01 |
| CPIJ002278 | S-methyl-5-thioadenosine phosphorylase                       |                                                 | -1,015 | 0,078 | 25,635   | 0,391 | -2,598 | 9,385E-03 |
| CPIJ009487 | Putative uncharacterized protein                             |                                                 | -1,014 | 0,543 | 3,942    | 0,825 | -1,229 | 2,190E-01 |
| CPIJ009725 | Putative uncharacterized protein                             | Pre-rRNA-processing protein RIX1 N-terminal do  | -1,014 | 0,412 | 7,788    | 0,659 | -1,539 | 1,237E-01 |
| CPIJ003764 | Putative uncharacterized protein                             | UMA domain-containing protein                   | -1,014 | 0,353 | 8,214    | 0,606 | -1,673 | 9,438E-02 |
| CPIJ016921 | 3-oxoacyl-[acyl-carrier-protein] reductase 1                 |                                                 | -1,014 | 0,629 | 2,680    | 0,962 | -1,053 | 2,922E-01 |
| CPIJ015942 | camp-dependent protein kinase type i-beta regulatory subunit |                                                 | -1,013 | 0,346 | 9,153    | 0,599 | -1,690 | 9,103E-02 |
| CPIJ014193 | Putative uncharacterized protein                             | Chitin-binding type-2 domain-containing protein | -1,013 | 0,002 | 224,119  | 0,262 | -3,869 | 1,095E-04 |
| CPIJ006220 | Putative uncharacterized protein                             |                                                 | -1,011 | 0,027 | 54,870   | 0,332 | -3,046 | 2,319E-03 |
| CPIJ005577 | Srpk                                                         |                                                 | -1,011 | 0,532 | 4,013    | 0,805 | -1,256 | 2,092E-01 |
| CPIJ014091 | Sorting nexin 14                                             |                                                 | -1,010 | 0,329 | 9,379    | 0,583 | -1,732 | 8,319E-02 |
| CPIJ008873 | prolylcarboxypeptidase, putative                             |                                                 | -1,010 | 0,000 | 669,192  | 0,199 | -5,069 | 4,009E-07 |
| CPIJ006918 | Putative uncharacterized protein                             |                                                 | -1,009 | 0,102 | 23,199   | 0,409 | -2,467 | 1,364E-02 |
| CPIJ001549 | Putative uncharacterized protein                             |                                                 | -1,008 | 0,577 | 3,294    | 0,869 | -1,160 | 2,460E-01 |
| CPIJ007514 | ATPase family AAA domain-containing protein 3                |                                                 | -1,008 | 0,340 | 11,899   | 0,591 | -1,706 | 8,795E-02 |
| CPIJ001128 | valacyclovir hydrolase, putative                             |                                                 | -1,007 | 0,046 | 34,607   | 0,355 | -2,833 | 4,612E-03 |
| CPIJ020092 | Putative uncharacterized protein                             | lactoylglutathione lyase                        | -1,006 | 0,010 | 78,857   | 0,295 | -3,414 | 6,402E-04 |
| CPIJ019868 | Heat shock 70 kDa protein 4                                  |                                                 | -1,006 | 0,124 | 26,451   | 0,425 | -2,366 | 1,797E-02 |
| CPIJ001284 | Putative uncharacterized protein                             | DPH-type MB domain-containing protein           | -1,004 | 0,475 | 5,182    | 0,725 | -1,385 | 1,660E-01 |
| CPIJ007254 | Putative uncharacterized protein                             | Conserved oligomeric Golgi complex subunit 3    | -1,003 | 0,407 | 8,231    | 0,648 | -1,548 | 1,216E-01 |
| CPIJ011590 | Putative uncharacterized protein                             | DUF4780 domain-containing protein               | -1,002 | 0,132 | 27,253   | 0,428 | -2,339 | 1,934E-02 |
| CPIJ013872 | Putative uncharacterized protein                             |                                                 | -1,001 | 0,409 | 7,705    | 0,648 | -1,545 | 1,224E-01 |
| CPIJ019318 | Putative uncharacterized protein                             | N-acetyltransferase domain-containing protein   | -1,001 | 0,274 | 12,438   | 0,534 | -1,874 | 6,089E-02 |
| CPIJ005358 | Putative uncharacterized protein                             |                                                 | 1,001  | 0,419 | 6,780    | 0,661 | 1,515  | 1,297E-01 |
| CPIJ009367 | Putative uncharacterized protein                             |                                                 | 1,002  | 0,019 | 47,758   | 0,316 | 3,171  | 1,517E-03 |
| CPIJ010972 | Zinc finger protein                                          |                                                 | 1,003  | 0,121 | 40,632   | 0,421 | 2,383  | 1,716E-02 |
| CPIJ005060 | alpha-amylase B precursor                                    |                                                 | 1,004  | 0,000 | 7686,575 | 0,122 | 8,219  | 2,052E-16 |
| CPIJ004795 | mitochondrial carrier protein, putative                      |                                                 | 1,006  | 0,077 | 23,055   | 0,386 | 2,604  | 9,212E-03 |
| CPIJ004547 | Lariat debranching enzyme                                    |                                                 | 1,007  | 0,123 | 19,630   | 0,424 | 2,374  | 1,761E-02 |
| CPIJ011616 | serine collagenase 1 precursor, putative                     |                                                 | 1,007  | 0,001 | 332,827  | 0,251 | 4,011  | 6,055E-05 |
| CPIJ020244 | Putative uncharacterized protein                             | Solute carrier family 3 member 2 N-terminal dom | 1,011  | 0,079 | 25,626   | 0,390 | 2,589  | 9,627E-03 |
| CPIJ002139 | HzC4 chymotrypsinogen                                        |                                                 | 1,011  | 0,000 | 3293,862 | 0,193 | 5,243  | 1,578E-07 |
| CPIJ011273 | 39S ribosomal protein 54, mitochondrial precursor            |                                                 | 1,015  | 0,080 | 22,823   | 0,393 | 2,582  | 9,809E-03 |
| CPIJ005417 | Synaptic vesicle glycoprotein 2C                             |                                                 | 1,015  | 0,287 | 2583,089 | 0,552 | 1,838  | 6,610E-02 |
| CPIJ006999 | Putative uncharacterized protein                             | 3'-5' exonuclease domain-containing protein     | 1,016  | 0,283 | 11,032   | 0,550 | 1,846  | 6,485E-02 |
| CPIJ013258 | Putative uncharacterized protein                             |                                                 | 1,016  | 0,250 | 10,415   | 0,524 | 1,937  | 5,275E-02 |



|                                                                     |                                                   |       |       |          |       |       |           |
|---------------------------------------------------------------------|---------------------------------------------------|-------|-------|----------|-------|-------|-----------|
| CPIJ003581 Putative uncharacterized protein                         | Chitin-binding type-4 domain-containing protein   | 1,017 | 0,002 | 124,902  | 0,258 | 3,947 | 7,920E-05 |
| CPIJ009131 Serpin B4                                                |                                                   | 1,018 | 0,080 | 26,099   | 0,394 | 2,584 | 9,775E-03 |
| CPIJ018159 Fibrinogen and fibronectin                               |                                                   | 1,019 | 0,002 | 97,947   | 0,264 | 3,863 | 1,118E-04 |
| CPIJ002892 Putative uncharacterized protein                         | Arrestin C-terminal-like domain-containing protei | 1,019 | 0,277 | 9,007    | 0,547 | 1,863 | 6,243E-02 |
| CPIJ014221 CYP9M13P: cytochrome P450 9M13P                          |                                                   | 1,021 | 0,012 | 47,778   | 0,306 | 3,338 | 8,424E-04 |
| CPIJ018231 carboxylesterase                                         |                                                   | 1,023 | 0,000 | 234,363  | 0,201 | 5,101 | 3,371E-07 |
| CPIJ004225 pancreatic triacylglycerol lipase precursor              |                                                   | 1,023 | 0,000 | 1381,443 | 0,184 | 5,548 | 2,895E-08 |
| CPIJ015646 N(4)-(Beta-N-acetylglucosaminy)-L-asparaginase           |                                                   | 1,024 | 0,167 | 14,777   | 0,465 | 2,204 | 2,755E-02 |
| CPIJ016094 Putative uncharacterized protein                         | Osteopetrosis-associated transmembrane protein 1  | 1,024 | 0,015 | 43,376   | 0,315 | 3,255 | 1,132E-03 |
| CPIJ002864 Tryptophan 2,3-dioxygenase                               |                                                   | 1,025 | 0,062 | 29,016   | 0,379 | 2,704 | 6,847E-03 |
| CPIJ010230 CYP12F10: cytochrome P450 12F10                          |                                                   | 1,026 | 0,067 | 25,779   | 0,385 | 2,667 | 7,663E-03 |
| CPIJ004613 importin subunit beta                                    |                                                   | 1,027 | 0,431 | 5,206    | 0,691 | 1,486 | 1,373E-01 |
| CPIJ016342 Putative uncharacterized protein                         | Chitin-binding type-2 domain-containing protein   | 1,027 | 0,006 | 95,957   | 0,287 | 3,577 | 3,469E-04 |
| CPIJ002025 Putative uncharacterized protein                         | FYVE-type domain-containing protein               | 1,031 | 0,076 | 31,963   | 0,395 | 2,607 | 9,126E-03 |
| CPIJ008243 Putative uncharacterized protein                         |                                                   | 1,031 | 0,015 | 66,743   | 0,316 | 3,265 | 1,094E-03 |
| CPIJ011864 Zinc finger protein 14                                   |                                                   | 1,035 | 0,158 | 17,176   | 0,463 | 2,236 | 2,535E-02 |
| CPIJ013122 Phospholipase D2                                         |                                                   | 1,037 | 0,009 | 69,105   | 0,302 | 3,439 | 5,845E-04 |
| CPIJ012311 Histone deacetylase                                      |                                                   | 1,039 | 0,001 | 258,510  | 0,246 | 4,217 | 2,476E-05 |
| CPIJ005697 n-acetylgalactosaminyltransferase                        |                                                   | 1,040 | 0,008 | 44,927   | 0,300 | 3,465 | 5,307E-04 |
| CPIJ001758 CYP4H38: cytochrome P450 4H38                            |                                                   | 1,041 | 0,000 | 311,361  | 0,238 | 4,380 | 1,187E-05 |
| CPIJ003305 NAD(P) transhydrogenase, mitochondrial precursor         |                                                   | 1,043 | 0,002 | 1424,059 | 0,265 | 3,935 | 8,320E-05 |
| CPIJ000973 Putative uncharacterized protein                         | Paramyosin                                        | 1,046 | 0,254 | 9,006    | 0,544 | 1,925 | 5,428E-02 |
| CPIJ010259 voltage and ligand gated potassium channel               |                                                   | 1,050 | 0,048 | 28,637   | 0,373 | 2,814 | 4,896E-03 |
| CPIJ015417 Xylulose kinase                                          |                                                   | 1,053 | 0,089 | 22,424   | 0,416 | 2,531 | 1,136E-02 |
| CPIJ006569 Glutaminase                                              |                                                   | 1,054 | 0,088 | 27,108   | 0,415 | 2,537 | 1,118E-02 |
| CPIJ001231 Putative uncharacterized protein                         |                                                   | 1,054 | 0,262 | 9,676    | 0,555 | 1,901 | 5,728E-02 |
| CPIJ019347 Copper-transporting ATPase 1                             |                                                   | 1,056 | 0,041 | 27,643   | 0,367 | 2,877 | 4,017E-03 |
| CPIJ002743 Putative uncharacterized protein                         | MD-2-related lipid-recognition domain-containing  | 1,057 | 0,000 | 2470,522 | 0,207 | 5,106 | 3,292E-07 |
| CPIJ011963 Multidrug resistance-associated protein 1                |                                                   | 1,057 | 0,236 | 13,064   | 0,534 | 1,982 | 4,750E-02 |
| CPIJ002680 Glutathione S-transferase                                |                                                   | 1,058 | 0,199 | 13,896   | 0,503 | 2,101 | 3,564E-02 |
| CPIJ018600 Putative uncharacterized protein                         | Potassium channel domain-containing protein       | 1,059 | 0,283 | 8,527    | 0,574 | 1,845 | 6,498E-02 |
| CPIJ005565 Nucleosomal histone kinase 1                             |                                                   | 1,059 | 0,369 | 5,689    | 0,648 | 1,634 | 1,023E-01 |
| CPIJ016645 Putative uncharacterized protein                         | WW domain-containing protein                      | 1,062 | 0,234 | 9,956    | 0,534 | 1,990 | 4,662E-02 |
| CPIJ000039 glucosyl/glucuronosyl transferases                       |                                                   | 1,065 | 0,000 | 136,638  | 0,244 | 4,362 | 1,287E-05 |
| CPIJ000823 Putative uncharacterized protein                         |                                                   | 1,066 | 0,168 | 12,340   | 0,485 | 2,199 | 2,789E-02 |
| CPIJ005956 CYP6BZ2: cytochrome P450 6BZ2                            |                                                   | 1,067 | 0,000 | 486,004  | 0,196 | 5,452 | 4,972E-08 |
| CPIJ004099 ATP-dependent RNA helicase SUV3, mitochondrial precursor |                                                   | 1,068 | 0,343 | 7,398    | 0,629 | 1,698 | 8,947E-02 |
| CPIJ009743 Troponin t, invertebrate                                 |                                                   | 1,069 | 0,000 | 217,648  | 0,228 | 4,689 | 2,749E-06 |

|            |                                             |       |       |          |       |       |           |
|------------|---------------------------------------------|-------|-------|----------|-------|-------|-----------|
| CPIJ016310 | Candidate tumor suppressor protein          | 1,069 | 0,243 | 11,740   | 0,547 | 1,956 | 5,042E-02 |
| CPIJ001939 | Putative uncharacterized protein            | 1,074 | 0,132 | 14,169   | 0,459 | 2,338 | 1,939E-02 |
| CPIJ010609 | Putative uncharacterized protein            | 1,075 | 0,341 | 6,111    | 0,631 | 1,705 | 8,828E-02 |
| CPIJ015039 | Synembryn                                   | 1,077 | 0,282 | 9,219    | 0,582 | 1,849 | 6,439E-02 |
| CPIJ012207 | Ammonium transporter 1                      | 1,082 | 0,005 | 54,870   | 0,298 | 3,628 | 2,859E-04 |
| CPIJ010052 | Ankyrin repeat domain-containing protein 44 | 1,083 | 0,012 | 40,679   | 0,325 | 3,327 | 8,782E-04 |
| CPIJ001335 | Serine threonine-protein kinase             | 1,083 | 0,016 | 67,432   | 0,334 | 3,242 | 1,186E-03 |
| CPIJ012511 | Uncharacterized protein (Fragment)          | 1,084 | 0,003 | 88,021   | 0,287 | 3,778 | 1,579E-04 |
| CPIJ004238 | Mitochondrial brown fat uncoupling protein  | 1,084 | 0,070 | 21,892   | 0,409 | 2,648 | 8,095E-03 |
| CPIJ005155 | Putative uncharacterized protein            | 1,089 | 0,001 | 79,186   | 0,265 | 4,115 | 3,870E-05 |
| CPIJ008671 | Zinc-finger protein ZPR1                    | 1,090 | 0,019 | 40,245   | 0,344 | 3,165 | 1,552E-03 |
| CPIJ000698 | Putative uncharacterized protein            | 1,096 | 0,139 | 13,099   | 0,474 | 2,312 | 2,076E-02 |
| CPIJ005050 | ATP-binding cassette sub-family A member 3  | 1,097 | 0,031 | 29,642   | 0,366 | 2,997 | 2,727E-03 |
| CPIJ009478 | CYP4D42: cytochrome P450 4D42               | 1,098 | 0,001 | 349,400  | 0,265 | 4,149 | 3,346E-05 |
| CPIJ016881 | Putative uncharacterized protein            | 1,102 | 0,276 | 7,336    | 0,590 | 1,867 | 6,188E-02 |
| CPIJ001749 | Ring canal kelch protein                    | 1,103 | 0,040 | 27,315   | 0,381 | 2,897 | 3,772E-03 |
| CPIJ003432 | Aldehyde dehydrogenase                      | 1,106 | 0,000 | 512,272  | 0,241 | 4,587 | 4,505E-06 |
| CPIJ001040 | Serine threonine kinase                     | 1,107 | 0,221 | 9,975    | 0,544 | 2,034 | 4,191E-02 |
| CPIJ001277 | Putative uncharacterized protein            | 1,107 | 0,037 | 26,127   | 0,378 | 2,929 | 3,401E-03 |
| CPIJ008353 | Putative uncharacterized protein            | 1,107 | 0,000 | 457,945  | 0,204 | 5,417 | 6,071E-08 |
| CPIJ001759 | CYP4H40: cytochrome P450 4H40               | 1,107 | 0,000 | 552,667  | 0,210 | 5,277 | 1,311E-07 |
| CPIJ014219 | CYP9M10P: cytochrome P450 9M10-de1b         | 1,110 | 0,019 | 46,362   | 0,349 | 3,182 | 1,461E-03 |
| CPIJ015980 | Putative uncharacterized protein            | 1,110 | 0,643 | 162,554  | 1,090 | 1,019 | 3,083E-01 |
| CPIJ016229 | gamma glutamyl transpeptidases              | 1,113 | 0,131 | 13,598   | 0,475 | 2,340 | 1,927E-02 |
| CPIJ018465 | Putative uncharacterized protein            | 1,114 | 0,845 | 34,080   | 2,164 | 0,515 | 6,067E-01 |
| CPIJ000024 | Putative uncharacterized protein            | 1,116 | 0,225 | 9,217    | 0,551 | 2,025 | 4,291E-02 |
| CPIJ005725 | alpha-amylase A precursor                   | 1,117 | 0,000 | 1405,428 | 0,203 | 5,504 | 3,708E-08 |
| CPIJ019840 | Actinin                                     | 1,117 | 0,012 | 43,754   | 0,334 | 3,341 | 8,349E-04 |
| CPIJ002518 | chymotrypsin 1 precursor                    | 1,118 | 0,641 | 23,307   | 1,089 | 1,027 | 3,044E-01 |
| CPIJ002236 | Putative uncharacterized protein            | 1,119 | 0,596 | 21,425   | 0,999 | 1,120 | 2,626E-01 |
| CPIJ001189 | Putative uncharacterized protein            | 1,119 | 0,167 | 11,803   | 0,508 | 2,204 | 2,750E-02 |
| CPIJ011985 | Putative uncharacterized protein            | 1,126 | 0,116 | 14,129   | 0,469 | 2,400 | 1,640E-02 |
| CPIJ004556 | Putative uncharacterized protein            | 1,127 | 0,036 | 26,265   | 0,384 | 2,935 | 3,340E-03 |
| CPIJ002077 | Aspartyl/asparaginyl beta-hydroxylase       | 1,128 | 0,024 | 46,071   | 0,366 | 3,082 | 2,059E-03 |
| CPIJ003989 | laminin subunit alpha precursor             | 1,129 | 0,040 | 32,307   | 0,391 | 2,885 | 3,908E-03 |
| CPIJ006761 | Glucose-6-phosphate 1-dehydrogenase         | 1,131 | 0,001 | 68,598   | 0,279 | 4,048 | 5,170E-05 |
| CPIJ017813 | Spermine oxidase                            | 1,132 | 0,101 | 15,429   | 0,458 | 2,472 | 1,345E-02 |
| CPIJ016093 | Putative uncharacterized protein            | 1,136 | 0,014 | 41,536   | 0,345 | 3,289 | 1,005E-03 |

|                                                                   |                                                   |       |       |           |       |        |           |
|-------------------------------------------------------------------|---------------------------------------------------|-------|-------|-----------|-------|--------|-----------|
| CPIJ011431 Putative uncharacterized protein                       |                                                   | 1,137 | 0,000 | 29072,141 | 0,105 | 10,868 | 1,639E-27 |
| CPIJ009357 alkali metal ion/proton exchanger 3                    |                                                   | 1,138 | 0,081 | 20,706    | 0,442 | 2,578  | 9,948E-03 |
| CPIJ002076 Aspartyl/asparaginyl beta-hydroxylase                  |                                                   | 1,143 | 0,066 | 18,905    | 0,427 | 2,676  | 7,444E-03 |
| CPIJ005726 histone acetyltransferase ESA1                         |                                                   | 1,145 | 0,124 | 15,878    | 0,483 | 2,369  | 1,786E-02 |
| CPIJ016046 hect E3 ubiquitin ligase, putative                     |                                                   | 1,147 | 0,210 | 9,355     | 0,554 | 2,069  | 3,851E-02 |
| CPIJ020053 glutathione transferase AtGST, putative                |                                                   | 1,150 | 0,002 | 90,070    | 0,300 | 3,838  | 1,243E-04 |
| CPIJ014888 Putative uncharacterized protein                       | PHD finger protein 12                             | 1,153 | 0,031 | 25,172    | 0,385 | 2,995  | 2,743E-03 |
| CPIJ014220 CYP9M12: cytochrome P450 9M12                          |                                                   | 1,155 | 0,000 | 97,817    | 0,255 | 4,530  | 5,912E-06 |
| CPIJ005743 Putative uncharacterized protein                       |                                                   | 1,156 | 0,016 | 31,373    | 0,359 | 3,225  | 1,260E-03 |
| CPIJ006896 Titin                                                  |                                                   | 1,159 | 0,149 | 14,157    | 0,510 | 2,271  | 2,316E-02 |
| CPIJ005632 Ganglioside induced differentiation associated protein |                                                   | 1,161 | 0,003 | 52,161    | 0,304 | 3,822  | 1,325E-04 |
| CPIJ017722 gamma glutamyl transpeptidases                         |                                                   | 1,161 | 0,010 | 37,927    | 0,342 | 3,393  | 6,909E-04 |
| CPIJ012328 GLI-Kruppel family member GLI4                         |                                                   | 1,164 | 0,318 | 6,323     | 0,659 | 1,765  | 7,750E-02 |
| CPIJ007483 Putative uncharacterized protein                       |                                                   | 1,164 | 0,276 | 8,043     | 0,624 | 1,865  | 6,219E-02 |
| CPIJ012368 Lipoprotein-releasing system ATP-binding protein lolD  |                                                   | 1,165 | 0,218 | 8,584     | 0,570 | 2,045  | 4,082E-02 |
| CPIJ009297 Putative uncharacterized protein                       | LIM zinc-binding domain-containing protein        | 1,165 | 0,054 | 21,385    | 0,422 | 2,760  | 5,784E-03 |
| CPIJ003397 Aldo-keto reductase                                    |                                                   | 1,165 | 0,226 | 8,643     | 0,577 | 2,020  | 4,338E-02 |
| CPIJ002809 Putative uncharacterized protein                       | BAG domain-containing protein                     | 1,166 | 0,262 | 7,622     | 0,614 | 1,899  | 5,761E-02 |
| CPIJ019131 DEAD box ATP-dependent RNA helicase                    |                                                   | 1,166 | 0,276 | 7,492     | 0,625 | 1,865  | 6,213E-02 |
| CPIJ000124 Putative uncharacterized protein                       |                                                   | 1,167 | 0,147 | 10,892    | 0,512 | 2,280  | 2,259E-02 |
| CPIJ011575 Sugar transporter                                      |                                                   | 1,170 | 0,218 | 12,496    | 0,572 | 2,045  | 4,085E-02 |
| CPIJ003177 guanine nucleotide exchange factor, putative           |                                                   | 1,170 | 0,282 | 6,386     | 0,632 | 1,851  | 6,419E-02 |
| CPIJ015177 Serine/threonine-protein kinase OSR1                   |                                                   | 1,170 | 0,007 | 35,069    | 0,334 | 3,506  | 4,549E-04 |
| CPIJ004209 Putative uncharacterized protein                       | Piezo non-specific cation channel R-Ras-binding c | 1,174 | 0,202 | 10,515    | 0,561 | 2,092  | 3,648E-02 |
| CPIJ014242 Putative uncharacterized protein                       |                                                   | 1,175 | 0,053 | 20,213    | 0,424 | 2,772  | 5,565E-03 |
| CPIJ000191 Sugar transporter                                      |                                                   | 1,181 | 0,000 | 105,702   | 0,242 | 4,884  | 1,037E-06 |
| CPIJ000488 Putative uncharacterized protein                       |                                                   | 1,183 | 0,000 | 14065,078 | 0,111 | 10,649 | 1,754E-26 |
| CPIJ019539 Putative uncharacterized protein                       | CCR4-NOT transcription complex subunit 4          | 1,185 | 0,205 | 9,092     | 0,568 | 2,084  | 3,719E-02 |
| CPIJ001794 Putative uncharacterized protein                       | PEHE domain-containing protein                    | 1,188 | 0,092 | 16,331    | 0,472 | 2,519  | 1,177E-02 |
| CPIJ011562 14.5 kDa salivary peptide, putative                    |                                                   | 1,189 | 0,004 | 54,306    | 0,323 | 3,678  | 2,353E-04 |
| CPIJ008557 Putative uncharacterized protein                       | Chitin-binding type-2 domain-containing protein   | 1,194 | 0,000 | 149,347   | 0,260 | 4,587  | 4,487E-06 |
| CPIJ016736 cysteine-rich venom protein, putative                  |                                                   | 1,197 | 0,519 | 19,831    | 0,930 | 1,287  | 1,980E-01 |
| CPIJ007727 Fibrinogen and fibronectin                             |                                                   | 1,197 | 0,000 | 196,772   | 0,216 | 5,547  | 2,911E-08 |
| CPIJ017149 I(2) long form, putative                               |                                                   | 1,199 | 0,022 | 40,356    | 0,385 | 3,115  | 1,839E-03 |
| CPIJ015480 Putative uncharacterized protein                       | C2H2-type domain-containing protein               | 1,199 | 0,316 | 5,147     | 0,678 | 1,768  | 7,698E-02 |
| CPIJ005566 SPARC precursor                                        |                                                   | 1,199 | 0,186 | 9,604     | 0,560 | 2,143  | 3,215E-02 |
| CPIJ003589 Putative uncharacterized protein                       | Ubiquitin-like domain-containing protein          | 1,204 | 0,000 | 742,612   | 0,206 | 5,831  | 5,516E-09 |
| CPIJ010495 carboxypeptidase N subunit 2 precursor                 |                                                   | 1,206 | 0,018 | 54,024    | 0,379 | 3,186  | 1,441E-03 |

|                                                                            |                                                  |       |       |         |       |       |           |
|----------------------------------------------------------------------------|--------------------------------------------------|-------|-------|---------|-------|-------|-----------|
| CPIJ006929 Putative uncharacterized protein                                | Arginine-glutamic acid dipeptide repeats protein | 1,214 | 0,205 | 7,694   | 0,583 | 2,082 | 3,732E-02 |
| CPIJ008379 Putative uncharacterized protein                                | Metallothionein                                  | 1,215 | 0,002 | 456,902 | 0,315 | 3,861 | 1,128E-04 |
| CPIJ013972 protein trithorax                                               |                                                  | 1,216 | 0,164 | 10,373  | 0,549 | 2,216 | 2,670E-02 |
| CPIJ007018 Putative uncharacterized protein                                |                                                  | 1,218 | 0,352 | 505,908 | 0,727 | 1,674 | 9,410E-02 |
| CPIJ001475 Zinc finger protein 58                                          |                                                  | 1,222 | 0,149 | 10,810  | 0,538 | 2,270 | 2,323E-02 |
| CPIJ040863 Putative uncharacterized protein                                | Serpin domain-containing protein                 | 1,222 | 0,106 | 11,853  | 0,500 | 2,444 | 1,452E-02 |
| CPIJ002359 Myomesin                                                        |                                                  | 1,226 | 0,144 | 10,308  | 0,535 | 2,291 | 2,197E-02 |
| CPIJ016657 short-chain dehydrogenase                                       |                                                  | 1,229 | 0,087 | 14,535  | 0,484 | 2,541 | 1,105E-02 |
| CPIJ018192 Putative uncharacterized protein                                | ADP/ATP translocase                              | 1,229 | 0,000 | 137,339 | 0,246 | 4,991 | 5,992E-07 |
| CPIJ020056 Cysteine dioxygenase                                            |                                                  | 1,229 | 0,000 | 61,344  | 0,278 | 4,421 | 9,840E-06 |
| CPIJ014520 Putative uncharacterized protein                                | G1/S-specific cyclin-D2                          | 1,231 | 0,183 | 8,422   | 0,572 | 2,154 | 3,126E-02 |
| CPIJ014779 Putative uncharacterized protein                                | PDZ domain-containing protein                    | 1,237 | 0,047 | 19,963  | 0,438 | 2,823 | 4,761E-03 |
| CPIJ003244 Putative uncharacterized protein                                | F-box domain-containing protein                  | 1,243 | 0,252 | 5,884   | 0,643 | 1,933 | 5,327E-02 |
| CPIJ019627 F-box/LRR-repeat protein 14                                     |                                                  | 1,246 | 0,152 | 10,071  | 0,552 | 2,257 | 2,401E-02 |
| CPIJ002937 trypsin delta/gamma precursor                                   |                                                  | 1,248 | 0,754 | 69,112  | 1,642 | 0,760 | 4,470E-01 |
| CPIJ017145 Putative uncharacterized protein                                |                                                  | 1,249 | 0,461 | 25,854  | 0,879 | 1,422 | 1,551E-01 |
| CPIJ004411 CYP6Z12: cytochrome P450 6Z12                                   |                                                  | 1,249 | 0,000 | 218,352 | 0,271 | 4,609 | 4,042E-06 |
| CPIJ007673 hyp37.3 putativesecreted salivary gland protein                 |                                                  | 1,254 | 0,094 | 11,876  | 0,501 | 2,505 | 1,226E-02 |
| CPIJ006120 microfibril-associated glycoprotein 4 precursor                 |                                                  | 1,255 | 0,023 | 37,518  | 0,405 | 3,098 | 1,950E-03 |
| CPIJ003388 Putative uncharacterized protein                                |                                                  | 1,259 | 0,205 | 7,062   | 0,604 | 2,084 | 3,712E-02 |
| CPIJ000256 peptidyl-alpha-hydroxyglycine alpha-amidating lyase 1 precursor |                                                  | 1,264 | 0,191 | 8,165   | 0,595 | 2,124 | 3,370E-02 |
| CPIJ005824 Maternal tudor protein                                          |                                                  | 1,264 | 0,000 | 61,748  | 0,279 | 4,529 | 5,932E-06 |
| CPIJ019120 chitotriosidase-1 precursor                                     |                                                  | 1,264 | 0,027 | 28,573  | 0,416 | 3,037 | 2,389E-03 |
| CPIJ005777 synaptic vesicle protein, putative                              |                                                  | 1,267 | 0,703 | 12,289  | 1,428 | 0,887 | 3,751E-01 |
| CPIJ017014 CYP6AG14: cytochrome P450 6AG14                                 |                                                  | 1,268 | 0,001 | 45,121  | 0,306 | 4,146 | 3,390E-05 |
| CPIJ015407 Xaa-Pro aminopeptidase 1                                        |                                                  | 1,268 | 0,000 | 64,534  | 0,286 | 4,428 | 9,513E-06 |
| CPIJ014179 Putative uncharacterized protein                                | Chitin-binding type-2 domain-containing protein  | 1,270 | 0,026 | 19,112  | 0,416 | 3,054 | 2,260E-03 |
| CPIJ015428 CYP6Z10: cytochrome P450 6Z10                                   |                                                  | 1,271 | 0,000 | 602,681 | 0,235 | 5,407 | 6,415E-08 |
| CPIJ003267 sodium/chloride dependent amino acid transporter                |                                                  | 1,272 | 0,000 | 66,499  | 0,290 | 4,381 | 1,179E-05 |
| CPIJ006574 Putative uncharacterized protein                                | N-alpha-acetyltransferase 60                     | 1,275 | 0,193 | 7,004   | 0,602 | 2,119 | 3,411E-02 |
| CPIJ009407 Putative uncharacterized protein                                | Chitin-binding type-2 domain-containing protein  | 1,275 | 0,630 | 50,359  | 1,215 | 1,050 | 2,937E-01 |
| CPIJ003974 Putative uncharacterized protein                                | E3 ubiquitin-protein ligase LRSAM1               | 1,277 | 0,007 | 35,826  | 0,363 | 3,519 | 4,330E-04 |
| CPIJ001419 receptor guanylate cyclase, putative                            |                                                  | 1,281 | 0,148 | 9,010   | 0,563 | 2,275 | 2,293E-02 |
| CPIJ010231 CYP12F9: cytochrome P450 12F9                                   |                                                  | 1,281 | 0,001 | 83,031  | 0,300 | 4,271 | 1,948E-05 |
| CPIJ007652 synaptic vesicle protein, putative                              |                                                  | 1,287 | 0,020 | 33,592  | 0,408 | 3,153 | 1,615E-03 |
| CPIJ018575 fibroblast growth factor receptor 3 precursor                   |                                                  | 1,290 | 0,065 | 21,685  | 0,480 | 2,684 | 7,264E-03 |
| CPIJ004339 CTL18: C-type lectin                                            |                                                  | 1,294 | 0,634 | 66,146  | 1,242 | 1,042 | 2,976E-01 |
| CPIJ012039 Putative uncharacterized protein                                | C2H2-type domain-containing protein              | 1,298 | 0,218 | 7,209   | 0,634 | 2,047 | 4,066E-02 |

|                                                                       |                                                    |       |       |         |       |       |           |
|-----------------------------------------------------------------------|----------------------------------------------------|-------|-------|---------|-------|-------|-----------|
| CPIJ000348 pregnancy zone protein precursor                           |                                                    | 1,299 | 0,001 | 161,096 | 0,318 | 4,089 | 4,332E-05 |
| CPIJ001265 Alkaline phosphatase                                       |                                                    | 1,306 | 0,000 | 631,376 | 0,269 | 4,858 | 1,187E-06 |
| CPIJ011185 deoxyribonuclease I, putative                              |                                                    | 1,312 | 0,000 | 115,006 | 0,290 | 4,531 | 5,881E-06 |
| CPIJ006409 Alanine-glyoxylate aminotransferase                        |                                                    | 1,316 | 0,002 | 117,317 | 0,334 | 3,936 | 8,273E-05 |
| CPIJ015854 Putative uncharacterized protein                           |                                                    | 1,318 | 0,081 | 12,691  | 0,511 | 2,579 | 9,904E-03 |
| CPIJ000192 Putative uncharacterized protein                           |                                                    | 1,318 | 0,013 | 23,405  | 0,397 | 3,324 | 8,881E-04 |
| CPIJ000323 Putative uncharacterized protein                           |                                                    | 1,319 | 0,010 | 25,869  | 0,387 | 3,410 | 6,492E-04 |
| CPIJ013862 phosphoglucomutase                                         |                                                    | 1,319 | 0,062 | 13,485  | 0,488 | 2,703 | 6,880E-03 |
| CPIJ012373 virus-induced RNA, putative                                |                                                    | 1,321 | 0,078 | 14,443  | 0,509 | 2,597 | 9,393E-03 |
| CPIJ019467 Zinc finger protein 572                                    |                                                    | 1,322 | 0,171 | 7,431   | 0,604 | 2,189 | 2,860E-02 |
| CPIJ009682 Translocator protein                                       |                                                    | 1,325 | 0,189 | 6,939   | 0,622 | 2,131 | 3,312E-02 |
| CPIJ001302 ryanodine receptor, putative                               |                                                    | 1,328 | 0,122 | 10,361  | 0,559 | 2,376 | 1,750E-02 |
| CPIJ009742 Putative uncharacterized protein                           |                                                    | 1,332 | 0,018 | 19,657  | 0,416 | 3,202 | 1,363E-03 |
| CPIJ003903 Putative uncharacterized protein                           | Leishmanolysin-like peptidase                      | 1,334 | 0,111 | 9,207   | 0,551 | 2,419 | 1,554E-02 |
| CPIJ006248 D-arabinose 1-dehydrogenase                                |                                                    | 1,335 | 0,001 | 53,267  | 0,325 | 4,108 | 3,990E-05 |
| CPIJ012055 sodium/chloride dependent amino acid transporter, putative |                                                    | 1,336 | 0,027 | 24,449  | 0,440 | 3,036 | 2,396E-03 |
| CPIJ006614 Putative uncharacterized protein                           |                                                    | 1,338 | 0,171 | 6,949   | 0,611 | 2,190 | 2,853E-02 |
| CPIJ000853 Myosin heavy chain                                         |                                                    | 1,342 | 0,000 | 451,725 | 0,263 | 5,107 | 3,278E-07 |
| CPIJ008109 Putative uncharacterized protein                           | Nose resistant-to-fluoxetine protein N-terminal do | 1,344 | 0,000 | 182,122 | 0,211 | 6,364 | 1,971E-10 |
| CPIJ016224 anionic trypsin-2 precursor                                |                                                    | 1,345 | 0,026 | 22,200  | 0,441 | 3,050 | 2,289E-03 |
| CPIJ017388 Zinc transporter                                           |                                                    | 1,346 | 0,084 | 17,098  | 0,526 | 2,559 | 1,050E-02 |
| CPIJ001742 Zinc carboxypeptidase                                      |                                                    | 1,346 | 0,000 | 418,739 | 0,268 | 5,024 | 5,074E-07 |
| CPIJ013259 myosin light chain 1, putative                             |                                                    | 1,354 | 0,000 | 485,916 | 0,232 | 5,828 | 5,614E-09 |
| CPIJ006267 LRIM16: leucine-rich immune protein (TM)                   |                                                    | 1,355 | 0,018 | 21,603  | 0,424 | 3,198 | 1,386E-03 |
| CPIJ002835 serine-pyruvate aminotransferase                           |                                                    | 1,357 | 0,016 | 42,009  | 0,419 | 3,241 | 1,193E-03 |
| CPIJ002938 meprin A subunit beta precursor                            |                                                    | 1,357 | 0,000 | 408,700 | 0,263 | 5,159 | 2,480E-07 |
| CPIJ015817 Putative uncharacterized protein                           |                                                    | 1,364 | 0,076 | 10,127  | 0,523 | 2,609 | 9,074E-03 |
| CPIJ012040 ficolin-1 precursor                                        |                                                    | 1,367 | 0,000 | 93,665  | 0,292 | 4,688 | 2,759E-06 |
| CPIJ003893 Putative uncharacterized protein                           | Transposase Synechocystis PCC 6803 domain-cor      | 1,371 | 0,114 | 10,109  | 0,569 | 2,411 | 1,590E-02 |
| CPIJ011382 chymotrypsin 1 precursor                                   |                                                    | 1,373 | 0,005 | 31,275  | 0,380 | 3,616 | 2,988E-04 |
| CPIJ006517 Putative uncharacterized protein                           |                                                    | 1,380 | 0,350 | 53,663  | 0,820 | 1,682 | 9,261E-02 |
| CPIJ005655 Oxidoreductase                                             |                                                    | 1,382 | 0,000 | 47,673  | 0,318 | 4,350 | 1,363E-05 |
| CPIJ020016 Putative uncharacterized protein                           | Tubulin polyglutamylase TTLL4                      | 1,386 | 0,132 | 7,964   | 0,593 | 2,338 | 1,940E-02 |
| CPIJ005322 Putative uncharacterized protein                           |                                                    | 1,389 | 0,001 | 146,826 | 0,339 | 4,092 | 4,268E-05 |
| CPIJ005432 NAD-dependent methanol dehydrogenase                       |                                                    | 1,391 | 0,003 | 27,539  | 0,368 | 3,775 | 1,599E-04 |
| CPIJ000250 Putative uncharacterized protein                           | Microtubule-associated protein tau                 | 1,395 | 0,166 | 7,851   | 0,631 | 2,210 | 2,714E-02 |
| CPIJ005692 Putative uncharacterized protein                           |                                                    | 1,402 | 0,005 | 25,965  | 0,385 | 3,640 | 2,721E-04 |
| CPIJ002358 titin, putative                                            |                                                    | 1,402 | 0,000 | 122,673 | 0,261 | 5,379 | 7,494E-08 |
| CPIJ010456 Cysteine dioxygenase                                       |                                                    | 1,405 | 0,003 | 27,643  | 0,367 | 3,829 | 1,288E-04 |

|            |                                                           |                                                  |       |       |          |       |       |           |
|------------|-----------------------------------------------------------|--------------------------------------------------|-------|-------|----------|-------|-------|-----------|
| CPIJ005641 | Lethal(2)essential for life protein, l2efl                |                                                  | 1,412 | 0,148 | 9,040    | 0,621 | 2,275 | 2,293E-02 |
| CPIJ000420 | protein mothers against dpp                               |                                                  | 1,413 | 0,059 | 15,680   | 0,518 | 2,728 | 6,379E-03 |
| CPIJ008558 | Putative uncharacterized protein                          | Chitin-binding type-2 domain-containing protein  | 1,416 | 0,000 | 959,878  | 0,305 | 4,650 | 3,326E-06 |
| CPIJ011026 | dehydrogenase/reductase SDR family member 7 precursor     |                                                  | 1,425 | 0,000 | 58,824   | 0,284 | 5,026 | 4,997E-07 |
| CPIJ015110 | Synaptic vesicle protein                                  |                                                  | 1,425 | 0,490 | 25,249   | 1,051 | 1,357 | 1,749E-01 |
| CPIJ008490 | Ankyrin repeat domain-containing protein 44               |                                                  | 1,426 | 0,014 | 23,043   | 0,434 | 3,286 | 1,016E-03 |
| CPIJ005492 | Putative uncharacterized protein                          | Sushi domain-containing protein                  | 1,431 | 0,000 | 113,836  | 0,248 | 5,759 | 8,445E-09 |
| CPIJ002297 | Sugar transporter                                         |                                                  | 1,434 | 0,084 | 10,145   | 0,560 | 2,561 | 1,043E-02 |
| CPIJ001861 | Sodium/solute symporter                                   |                                                  | 1,438 | 0,061 | 12,678   | 0,531 | 2,709 | 6,748E-03 |
| CPIJ007535 | Adhesive serine protease                                  |                                                  | 1,439 | 0,082 | 13,592   | 0,560 | 2,572 | 1,011E-02 |
| CPIJ002493 | Cation efflux protein/ zinc transporter                   |                                                  | 1,441 | 0,019 | 20,895   | 0,454 | 3,173 | 1,508E-03 |
| CPIJ007903 | peritrophin-1 precursor                                   |                                                  | 1,442 | 0,820 | 14,829   | 2,491 | 0,579 | 5,627E-01 |
| CPIJ014296 | Troponin i                                                |                                                  | 1,453 | 0,000 | 265,946  | 0,225 | 6,452 | 1,101E-10 |
| CPIJ008433 | transmembrane emp24 domain-containing protein 1 precursor |                                                  | 1,466 | 0,078 | 8,939    | 0,564 | 2,598 | 9,389E-03 |
| CPIJ012681 | ADAM metalloprotease                                      |                                                  | 1,470 | 0,012 | 18,102   | 0,439 | 3,348 | 8,146E-04 |
| CPIJ011256 | Putative uncharacterized protein                          |                                                  | 1,472 | 0,107 | 9,884    | 0,604 | 2,438 | 1,477E-02 |
| CPIJ010068 | ATP-binding cassette sub-family A member 7                |                                                  | 1,472 | 0,000 | 497,576  | 0,226 | 6,517 | 7,169E-11 |
| CPIJ004783 | Putative uncharacterized protein                          |                                                  | 1,481 | 0,106 | 7,386    | 0,606 | 2,443 | 1,456E-02 |
| CPIJ007777 | Putative uncharacterized protein                          |                                                  | 1,482 | 0,094 | 13,217   | 0,591 | 2,508 | 1,212E-02 |
| CPIJ014181 | Putative uncharacterized protein                          | Chitin-binding type-2 domain-containing protein  | 1,503 | 0,000 | 1580,835 | 0,168 | 8,961 | 3,218E-19 |
| CPIJ003787 | Putative uncharacterized protein                          | Protein with signal anchor                       | 1,509 | 0,224 | 93,528   | 0,744 | 2,028 | 4,255E-02 |
| CPIJ007603 | Putative uncharacterized protein                          | Chitin-binding type-2 domain-containing protein  | 1,512 | 0,095 | 9,065    | 0,605 | 2,500 | 1,241E-02 |
| CPIJ003058 | Troponin C                                                |                                                  | 1,514 | 0,000 | 203,084  | 0,310 | 4,879 | 1,065E-06 |
| CPIJ010541 | CYP9J37: cytochrome P450 9J37                             |                                                  | 1,519 | 0,000 | 368,959  | 0,243 | 6,250 | 4,116E-10 |
| CPIJ017511 | chitotriosidase-1 precursor                               |                                                  | 1,522 | 0,000 | 779,857  | 0,306 | 4,968 | 6,755E-07 |
| CPIJ011198 | Threonine dehydratase/deaminase                           |                                                  | 1,522 | 0,473 | 74,451   | 1,095 | 1,390 | 1,646E-01 |
| CPIJ010310 | Putative uncharacterized protein                          | CHK kinase-like domain-containing protein        | 1,523 | 0,001 | 72,905   | 0,363 | 4,193 | 2,750E-05 |
| CPIJ011550 | tubulin alpha-2 chain                                     |                                                  | 1,528 | 0,040 | 11,738   | 0,527 | 2,898 | 3,761E-03 |
| CPIJ019182 | Ribonuclease UK114                                        |                                                  | 1,529 | 0,006 | 19,363   | 0,429 | 3,569 | 3,589E-04 |
| CPIJ002534 | Sodium/iodide cotransporter                               |                                                  | 1,530 | 0,004 | 32,889   | 0,417 | 3,672 | 2,407E-04 |
| CPIJ001757 | CYP4H39: cytochrome P450 4H39                             |                                                  | 1,530 | 0,000 | 127,621  | 0,249 | 6,142 | 8,155E-10 |
| CPIJ016210 | Putative uncharacterized protein                          | ZP domain-containing protein                     | 1,531 | 0,075 | 9,308    | 0,585 | 2,618 | 8,839E-03 |
| CPIJ006075 | trypsin beta precursor                                    |                                                  | 1,533 | 0,000 | 134,108  | 0,333 | 4,606 | 4,097E-06 |
| CPIJ000377 | Homogentisate 1,2-dioxygenase                             |                                                  | 1,536 | 0,027 | 11,851   | 0,505 | 3,040 | 2,362E-03 |
| CPIJ001859 | Sodium/solute symporter                                   |                                                  | 1,536 | 0,013 | 21,973   | 0,465 | 3,306 | 9,478E-04 |
| CPIJ016520 | Suppressor of defective silencing                         |                                                  | 1,538 | 0,121 | 6,298    | 0,646 | 2,380 | 1,729E-02 |
| CPIJ002740 | Putative uncharacterized protein                          | MD-2-related lipid-recognition domain-containing | 1,549 | 0,000 | 555,947  | 0,304 | 5,092 | 3,537E-07 |
| CPIJ008266 | Putative uncharacterized protein                          | Chitin-binding type-2 domain-containing protein  | 1,554 | 0,080 | 8,520    | 0,602 | 2,582 | 9,816E-03 |

|            |                                                                     |                                                  |       |       |          |       |        |           |
|------------|---------------------------------------------------------------------|--------------------------------------------------|-------|-------|----------|-------|--------|-----------|
| CPIJ009656 | Putative uncharacterized protein                                    |                                                  | 1,561 | 0,000 | 33,892   | 0,349 | 4,474  | 7,671E-06 |
| CPIJ002867 | AMP dependent coa ligase, putative                                  |                                                  | 1,570 | 0,201 | 229,696  | 0,749 | 2,097  | 3,600E-02 |
| CPIJ018021 | calcium-transporting atpase sarcoplasmic/endoplasmic reticulum type |                                                  | 1,575 | 0,228 | 130,614  | 0,782 | 2,014  | 4,400E-02 |
| CPIJ003603 | Putative uncharacterized protein                                    | AN1-type domain-containing protein               | 1,578 | 0,001 | 27,773   | 0,380 | 4,154  | 3,260E-05 |
| CPIJ000852 | Myosin-Id                                                           |                                                  | 1,579 | 0,000 | 207,807  | 0,270 | 5,855  | 4,760E-09 |
| CPIJ009553 | Putative uncharacterized protein                                    |                                                  | 1,590 | 0,003 | 25,081   | 0,422 | 3,763  | 1,676E-04 |
| CPIJ011427 | Putative uncharacterized protein                                    | U2A'/phosphoprotein 32 family A C-terminal dom   | 1,594 | 0,036 | 14,553   | 0,543 | 2,936  | 3,323E-03 |
| CPIJ016573 | Aladin                                                              |                                                  | 1,598 | 0,043 | 10,075   | 0,559 | 2,857  | 4,272E-03 |
| CPIJ001188 | Putative uncharacterized protein                                    |                                                  | 1,608 | 0,071 | 9,754    | 0,608 | 2,643  | 8,206E-03 |
| CPIJ008467 | Putative uncharacterized protein                                    | Chitin-binding type-2 domain-containing protein  | 1,625 | 0,013 | 13,892   | 0,492 | 3,305  | 9,481E-04 |
| CPIJ017226 | Zinc finger protein 449                                             |                                                  | 1,627 | 0,074 | 11,189   | 0,620 | 2,624  | 8,681E-03 |
| CPIJ001230 | Putative uncharacterized protein                                    |                                                  | 1,629 | 0,008 | 15,761   | 0,467 | 3,488  | 4,869E-04 |
| CPIJ011190 | deoxyribonuclease I, putative                                       |                                                  | 1,632 | 0,000 | 108,768  | 0,273 | 5,989  | 2,109E-09 |
| CPIJ003277 | U1 small nuclear ribonucleoprotein C                                |                                                  | 1,636 | 0,037 | 9,075    | 0,559 | 2,925  | 3,448E-03 |
| CPIJ003868 | Putative uncharacterized protein                                    |                                                  | 1,650 | 0,001 | 25,700   | 0,387 | 4,260  | 2,046E-05 |
| CPIJ010666 | Putative uncharacterized protein                                    |                                                  | 1,663 | 0,067 | 7,102    | 0,623 | 2,668  | 7,634E-03 |
| CPIJ010173 | Testis-specific protein pbs13                                       |                                                  | 1,664 | 0,000 | 59,503   | 0,378 | 4,403  | 1,070E-05 |
| CPIJ003384 | deoxyribonuclease I, putative                                       |                                                  | 1,668 | 0,341 | 77,178   | 0,980 | 1,703  | 8,865E-02 |
| CPIJ018313 | protein 5NUC precursor                                              |                                                  | 1,668 | 0,000 | 154,123  | 0,267 | 6,254  | 3,990E-10 |
| CPIJ040188 | NA                                                                  |                                                  | 1,673 | 0,104 | 6,278    | 0,682 | 2,454  | 1,412E-02 |
| CPIJ018314 | SALAPY1: salivary apyrase                                           |                                                  | 1,675 | 0,000 | 328,534  | 0,235 | 7,118  | 1,093E-12 |
| CPIJ004343 | Putative uncharacterized protein                                    | Farnesoic acid O-methyl transferase domain-conta | 1,676 | 0,004 | 15,989   | 0,455 | 3,687  | 2,271E-04 |
| CPIJ002138 | chymotrypsinogen, putative                                          |                                                  | 1,683 | 0,000 | 30,212   | 0,360 | 4,672  | 2,988E-06 |
| CPIJ018233 | carboxylesterase                                                    |                                                  | 1,707 | 0,000 | 9567,293 | 0,125 | 13,620 | 3,056E-42 |
| CPIJ016344 | Putative uncharacterized protein                                    | Chitin-binding type-2 domain-containing protein  | 1,710 | 0,022 | 13,774   | 0,547 | 3,124  | 1,786E-03 |
| CPIJ015734 | Putative uncharacterized protein                                    | Chitin-binding type-2 domain-containing protein  | 1,716 | 0,000 | 2392,343 | 0,235 | 7,290  | 3,099E-13 |
| CPIJ002395 | Dopachrome conversion enzyme                                        |                                                  | 1,717 | 0,001 | 32,398   | 0,401 | 4,278  | 1,888E-05 |
| CPIJ005898 | Putative uncharacterized protein                                    | Chitin-binding type-2 domain-containing protein  | 1,726 | 0,000 | 148,378  | 0,231 | 7,467  | 8,222E-14 |
| CPIJ018848 | Mitochondrial protein import protein MAS5                           |                                                  | 1,727 | 0,000 | 106,708  | 0,336 | 5,142  | 2,713E-07 |
| CPIJ008555 | Uncharacterized protein (Fragment)                                  |                                                  | 1,737 | 0,046 | 7,619    | 0,614 | 2,827  | 4,704E-03 |
| CPIJ012979 | Crumbs                                                              |                                                  | 1,737 | 0,003 | 15,591   | 0,460 | 3,780  | 1,571E-04 |
| CPIJ003274 | vacuolar proton translocating ATPase 116 kDa subunit a isoform 1    |                                                  | 1,742 | 0,329 | 73,267   | 1,008 | 1,728  | 8,393E-02 |
| CPIJ012159 | Sphingomyelin phosphodiesterase                                     |                                                  | 1,752 | 0,300 | 28,652   | 0,969 | 1,808  | 7,053E-02 |
| CPIJ009655 | Elongation factor 1-alpha                                           |                                                  | 1,754 | 0,001 | 28,292   | 0,435 | 4,036  | 5,431E-05 |
| CPIJ004944 | Origin recognition complex subunit 4                                |                                                  | 1,756 | 0,040 | 9,197    | 0,607 | 2,894  | 3,804E-03 |
| CPIJ003983 | Putative uncharacterized protein                                    |                                                  | 1,761 | 0,392 | 31,817   | 1,114 | 1,580  | 1,140E-01 |
| CPIJ039839 | Putative uncharacterized protein                                    | Cuticle protein                                  | 1,769 | 0,001 | 26,016   | 0,416 | 4,254  | 2,095E-05 |
| CPIJ002361 | sodium/solute symporter, putative                                   |                                                  | 1,769 | 0,002 | 31,603   | 0,447 | 3,962  | 7,439E-05 |
| CPIJ015813 | Putative uncharacterized protein                                    | chloroplast protein-transporting ATPase          | 1,774 | 0,002 | 20,635   | 0,460 | 3,856  | 1,152E-04 |



|            |                                               |                                                  |       |       |          |       |        |           |
|------------|-----------------------------------------------|--------------------------------------------------|-------|-------|----------|-------|--------|-----------|
| CPIJ001464 | alpha-amylase A precursor                     |                                                  | 1,815 | 0,000 | 1152,509 | 0,273 | 6,653  | 2,870E-11 |
| CPIJ000151 | Sodium/solute symporter                       |                                                  | 1,816 | 0,043 | 10,074   | 0,635 | 2,858  | 4,270E-03 |
| CPIJ001773 | Synaptic vesicle protein                      |                                                  | 1,817 | 0,004 | 21,899   | 0,495 | 3,674  | 2,389E-04 |
| CPIJ019593 | Putative uncharacterized protein              | CCHC-type domain-containing protein              | 1,820 | 0,000 | 72,232   | 0,304 | 5,990  | 2,105E-09 |
| CPIJ004224 | Pancreatic triacylglycerol lipase             |                                                  | 1,823 | 0,000 | 430,502  | 0,224 | 8,128  | 4,375E-16 |
| CPIJ006152 | Putative uncharacterized protein              |                                                  | 1,823 | 0,041 | 6,929    | 0,633 | 2,878  | 3,997E-03 |
| CPIJ019606 | asparagine synthetase, putative               |                                                  | 1,830 | 0,001 | 30,913   | 0,452 | 4,044  | 5,264E-05 |
| CPIJ008702 | Putative uncharacterized protein              | Gamma-interferon inducible lysosomal thiol reduc | 1,839 | 0,000 | 30,038   | 0,374 | 4,922  | 8,558E-07 |
| CPIJ008079 | alpha-amylase 1 precursor                     |                                                  | 1,846 | 0,012 | 1219,730 | 0,552 | 3,342  | 8,323E-04 |
| CPIJ003457 | Putative uncharacterized protein              | CUB domain-containing protein                    | 1,862 | 0,003 | 14,392   | 0,494 | 3,770  | 1,630E-04 |
| CPIJ007178 | Putative uncharacterized protein              | Peptidase C45 hydrolase domain-containing protei | 1,863 | 0,000 | 73,361   | 0,352 | 5,296  | 1,185E-07 |
| CPIJ009326 | Endocuticle structural glycoprotein SgAbd-4   |                                                  | 1,867 | 0,015 | 11,315   | 0,573 | 3,259  | 1,119E-03 |
| CPIJ007938 | Asparagine synthetase B                       |                                                  | 1,869 | 0,000 | 60,054   | 0,391 | 4,775  | 1,796E-06 |
| CPIJ016326 | Putative uncharacterized protein              |                                                  | 1,870 | 0,072 | 326,123  | 0,711 | 2,633  | 8,475E-03 |
| CPIJ005698 | n-acetylgalactosaminyltransferase             |                                                  | 1,874 | 0,000 | 19,137   | 0,433 | 4,331  | 1,485E-05 |
| CPIJ007760 | Putative uncharacterized protein              |                                                  | 1,884 | 0,000 | 35,995   | 0,403 | 4,671  | 2,998E-06 |
| CPIJ010307 | Putative uncharacterized protein              | CHK kinase-like domain-containing protein        | 1,894 | 0,000 | 190,858  | 0,219 | 8,668  | 4,402E-18 |
| CPIJ017793 | Elegaxobin-2                                  |                                                  | 1,915 | 0,020 | 13,645   | 0,606 | 3,161  | 1,572E-03 |
| CPIJ011346 | Notch                                         |                                                  | 1,918 | 0,001 | 16,610   | 0,458 | 4,190  | 2,788E-05 |
| CPIJ000023 | Putative uncharacterized protein              |                                                  | 1,924 | 0,003 | 14,872   | 0,508 | 3,790  | 1,506E-04 |
| CPIJ008523 | serine-type enodpeptidase, putative           |                                                  | 1,936 | 0,001 | 15,653   | 0,479 | 4,043  | 5,278E-05 |
| CPIJ016301 | Serine protease inhibitor A3G                 |                                                  | 1,941 | 0,009 | 12,925   | 0,566 | 3,430  | 6,038E-04 |
| CPIJ015785 | transferrin precursor                         |                                                  | 1,958 | 0,000 | 35,304   | 0,425 | 4,607  | 4,090E-06 |
| CPIJ010516 | Phosphoenolpyruvate carboxykinase             |                                                  | 1,961 | 0,277 | 20,889   | 1,054 | 1,861  | 6,269E-02 |
| CPIJ007828 | bile salt-activated lipase precursor          |                                                  | 1,964 | 0,003 | 13,030   | 0,521 | 3,767  | 1,653E-04 |
| CPIJ004223 | pancreatic triacylglycerol lipase precursor   |                                                  | 1,972 | 0,000 | 1681,662 | 0,182 | 10,812 | 3,010E-27 |
| CPIJ009976 | Putative uncharacterized protein              | Mannose-6-phosphate receptor domain-containing   | 1,973 | 0,000 | 25,356   | 0,401 | 4,919  | 8,703E-07 |
| CPIJ010308 | Putative uncharacterized protein              | CHK kinase-like domain-containing protein        | 1,975 | 0,000 | 43,716   | 0,318 | 6,203  | 5,535E-10 |
| CPIJ015482 | Putative uncharacterized protein              |                                                  | 1,979 | 0,035 | 6,202    | 0,670 | 2,952  | 3,156E-03 |
| CPIJ017693 | Putative uncharacterized protein              |                                                  | 1,992 | 0,039 | 7,104    | 0,687 | 2,901  | 3,718E-03 |
| CPIJ011298 | Brachyurin                                    |                                                  | 1,995 | 0,000 | 28,202   | 0,453 | 4,404  | 1,063E-05 |
| CPIJ006967 | Putative uncharacterized protein              |                                                  | 1,999 | 0,040 | 7,509    | 0,693 | 2,886  | 3,897E-03 |
| CPIJ012798 | Putative uncharacterized protein              | Cuticular protein                                | 2,007 | 0,037 | 7,428    | 0,687 | 2,922  | 3,480E-03 |
| CPIJ015858 | Uncharacterized protein (Fragment)            |                                                  | 2,014 | 0,006 | 11,805   | 0,561 | 3,588  | 3,334E-04 |
| CPIJ009746 | Putative uncharacterized protein              |                                                  | 2,056 | 0,001 | 16,641   | 0,503 | 4,084  | 4,429E-05 |
| CPIJ003349 | abc transporter, putative                     |                                                  | 2,057 | 0,012 | 7,759    | 0,618 | 3,329  | 8,701E-04 |
| CPIJ012831 | Fibrinogen and fibronectin                    |                                                  | 2,057 | 0,000 | 50,881   | 0,402 | 5,122  | 3,030E-07 |
| CPIJ018121 | membrane-bound alkaline phosphatase precursor |                                                  | 2,071 | 0,129 | 222,917  | 0,881 | 2,351  | 1,875E-02 |

|                                                          |                                                 |       |       |          |       |       |           |
|----------------------------------------------------------|-------------------------------------------------|-------|-------|----------|-------|-------|-----------|
| CPIJ003361 CYP6BY2: cytochrome P450 6BY2                 |                                                 | 2,080 | 0,000 | 59,626   | 0,366 | 5,683 | 1,321E-08 |
| CPIJ009106 angiotensin-converting enzyme precursor       |                                                 | 2,085 | 0,001 | 13,402   | 0,500 | 4,167 | 3,084E-05 |
| CPIJ002604 Imaginal disc growth factor                   |                                                 | 2,091 | 0,015 | 8,438    | 0,641 | 3,259 | 1,117E-03 |
| CPIJ011642 Putative uncharacterized protein              |                                                 | 2,091 | 0,000 | 16,964   | 0,480 | 4,360 | 1,301E-05 |
| CPIJ013793 Cuticle protein 8                             |                                                 | 2,107 | 0,000 | 87,448   | 0,286 | 7,365 | 1,774E-13 |
| CPIJ013510 Putative uncharacterized protein              |                                                 | 2,118 | 0,288 | 60,322   | 1,155 | 1,834 | 6,662E-02 |
| CPIJ003562 Putative uncharacterized protein              | AF-9 ANC1 homology domain-containing protein    | 2,126 | 0,022 | 7,331    | 0,682 | 3,117 | 1,827E-03 |
| CPIJ011478 Lipase                                        |                                                 | 2,153 | 0,036 | 5,774    | 0,733 | 2,938 | 3,306E-03 |
| CPIJ009625 proclotting enzyme precursor                  |                                                 | 2,163 | 0,009 | 9,424    | 0,627 | 3,448 | 5,650E-04 |
| CPIJ014743 GTP-binding protein-invertebrate              |                                                 | 2,166 | 0,012 | 7,271    | 0,649 | 3,335 | 8,536E-04 |
| CPIJ006792 spaetzle 1B                                   |                                                 | 2,177 | 0,002 | 10,359   | 0,563 | 3,867 | 1,100E-04 |
| CPIJ017789 Serine protease                               |                                                 | 2,178 | 0,000 | 24,050   | 0,482 | 4,519 | 6,223E-06 |
| CPIJ017721 gamma-glutamyltranspeptidase precursor        |                                                 | 2,182 | 0,000 | 15,563   | 0,502 | 4,349 | 1,367E-05 |
| CPIJ013879 DNA polymerase theta                          |                                                 | 2,205 | 0,000 | 26,226   | 0,453 | 4,869 | 1,122E-06 |
| CPIJ013933 Putative uncharacterized protein              |                                                 | 2,213 | 0,000 | 25,967   | 0,429 | 5,161 | 2,456E-07 |
| CPIJ000007 Chitinase                                     |                                                 | 2,215 | 0,230 | 43,741   | 1,106 | 2,002 | 4,525E-02 |
| CPIJ002609 protein serine/threonine kinase, putative     |                                                 | 2,216 | 0,000 | 47,744   | 0,357 | 6,213 | 5,189E-10 |
| CPIJ004417 4-hydroxyphenylpyruvate dioxygenase           |                                                 | 2,222 | 0,000 | 22,807   | 0,416 | 5,348 | 8,910E-08 |
| CPIJ002235 Putative uncharacterized protein              |                                                 | 2,239 | 0,149 | 51,853   | 0,987 | 2,269 | 2,327E-02 |
| CPIJ002629 sensory appendage protein, putative           |                                                 | 2,252 | 0,000 | 67,736   | 0,394 | 5,718 | 1,075E-08 |
| CPIJ008502 Putative uncharacterized protein              | Chitin-binding type-2 domain-containing protein | 2,252 | 0,441 | 8,677    | 1,535 | 1,468 | 1,422E-01 |
| CPIJ013085 Sarcalumenin                                  |                                                 | 2,280 | 0,000 | 32,406   | 0,454 | 5,016 | 5,267E-07 |
| CPIJ011417 neurexin-4 precursor                          |                                                 | 2,304 | 0,004 | 8,022    | 0,627 | 3,676 | 2,374E-04 |
| CPIJ000699 Vago: salivary Cys-rich secreted protein Vago |                                                 | 2,305 | 0,017 | 7,206    | 0,718 | 3,211 | 1,324E-03 |
| CPIJ020229 CYP4D42: cytochrome P450 4D42                 |                                                 | 2,328 | 0,000 | 48,651   | 0,320 | 7,269 | 3,630E-13 |
| CPIJ016534 Putative uncharacterized protein              |                                                 | 2,357 | 0,004 | 7,927    | 0,631 | 3,733 | 1,892E-04 |
| CPIJ010546 CYP9J34: cytochrome P450 9J34                 |                                                 | 2,377 | 0,000 | 1010,652 | 0,316 | 7,524 | 5,316E-14 |
| CPIJ007082 TIM: timeless circadian protein               |                                                 | 2,378 | 0,000 | 25,313   | 0,404 | 5,891 | 3,850E-09 |
| CPIJ017285 Putative uncharacterized protein              | F-box domain-containing protein                 | 2,415 | 0,016 | 6,688    | 0,746 | 3,237 | 1,207E-03 |
| CPIJ004230 Lipase                                        |                                                 | 2,453 | 0,000 | 259,090  | 0,271 | 9,061 | 1,294E-19 |
| CPIJ017065 NMDA-type glutamate receptor subunit 1        |                                                 | 2,467 | 0,000 | 11,762   | 0,558 | 4,422 | 9,759E-06 |
| CPIJ013609 Putative uncharacterized protein              | Myofilin                                        | 2,468 | 0,020 | 40,434   | 0,782 | 3,154 | 1,609E-03 |
| CPIJ001777 ataxia telangiectasia mutated, putative       |                                                 | 2,468 | 0,001 | 10,409   | 0,593 | 4,162 | 3,150E-05 |
| CPIJ013511 Putative uncharacterized protein              |                                                 | 2,473 | 0,098 | 24,219   | 0,995 | 2,486 | 1,291E-02 |
| CPIJ001560 calcium-binding protein, putative             |                                                 | 2,490 | 0,045 | 48,721   | 0,878 | 2,836 | 4,570E-03 |
| CPIJ019360 Predicted protein                             |                                                 | 2,499 | 0,001 | 9,939    | 0,588 | 4,248 | 2,160E-05 |
| CPIJ011584 Putative uncharacterized protein              |                                                 | 2,505 | 0,051 | 24,964   | 0,899 | 2,786 | 5,336E-03 |
| CPIJ017156 Ankyrin repeat and SOCS box protein 13        |                                                 | 2,508 | 0,000 | 19,433   | 0,490 | 5,124 | 2,996E-07 |
| CPIJ002628 sensory appendage protein, putative           |                                                 | 2,522 | 0,001 | 13,980   | 0,607 | 4,156 | 3,235E-05 |

|            |                                             |                                                            |       |       |          |       |        |           |
|------------|---------------------------------------------|------------------------------------------------------------|-------|-------|----------|-------|--------|-----------|
| CPIJ012013 | serine protease inhibitor, serpin           |                                                            | 2,531 | 0,000 | 14,308   | 0,576 | 4,392  | 1,122E-05 |
| CPIJ010806 | Putative uncharacterized protein            | Peptidase M14 carboxypeptidase A domain-containing protein | 2,613 | 0,012 | 48,556   | 0,781 | 3,345  | 8,238E-04 |
| CPIJ017792 | Serine protease                             |                                                            | 2,615 | 0,002 | 7,800    | 0,670 | 3,906  | 9,391E-05 |
| CPIJ019874 | salivary cysteine-rich peptide              |                                                            | 2,653 | 0,000 | 25,753   | 0,420 | 6,323  | 2,559E-10 |
| CPIJ002744 | Putative uncharacterized protein            | MD-2-related lipid-recognition domain-containing protein   | 2,661 | 0,000 | 171,611  | 0,335 | 7,933  | 2,135E-15 |
| CPIJ002849 | Putative uncharacterized protein            | Single domain-containing protein                           | 2,668 | 0,000 | 25,217   | 0,514 | 5,186  | 2,144E-07 |
| CPIJ002659 | Transmembrane protease                      |                                                            | 2,689 | 0,003 | 8,036    | 0,703 | 3,823  | 1,319E-04 |
| CPIJ001747 | tep3                                        |                                                            | 2,729 | 0,000 | 39,444   | 0,382 | 7,154  | 8,449E-13 |
| CPIJ017122 | Putative uncharacterized protein            | Superoxide dismutase copper/zinc binding domain            | 2,730 | 0,000 | 35,113   | 0,427 | 6,397  | 1,589E-10 |
| CPIJ003372 | Putative uncharacterized protein            |                                                            | 2,765 | 0,002 | 8,134    | 0,698 | 3,959  | 7,528E-05 |
| CPIJ040816 | NA                                          |                                                            | 2,802 | 0,001 | 7,960    | 0,687 | 4,082  | 4,464E-05 |
| CPIJ016697 | Leukocyte elastase inhibitor                |                                                            | 2,805 | 0,001 | 8,869    | 0,664 | 4,226  | 2,377E-05 |
| CPIJ007204 | apolipoporphins precursor                   |                                                            | 2,843 | 0,154 | 37,685   | 1,263 | 2,251  | 2,440E-02 |
| CPIJ004730 | Putative uncharacterized protein            | Chitin-binding type-2 domain-containing protein            | 2,870 | 0,000 | 1558,105 | 0,280 | 10,251 | 1,168E-24 |
| CPIJ004228 | Lipase                                      |                                                            | 2,927 | 0,000 | 2154,214 | 0,191 | 15,289 | 9,025E-53 |
| CPIJ000094 | Putative uncharacterized protein            |                                                            | 3,166 | 0,001 | 7,020    | 0,742 | 4,266  | 1,988E-05 |
| CPIJ014406 | Putative uncharacterized protein            |                                                            | 3,206 | 0,018 | 41,200   | 1,006 | 3,186  | 1,443E-03 |
| CPIJ002370 | Putative uncharacterized protein            |                                                            | 3,304 | 0,000 | 7,062    | 0,767 | 4,309  | 1,639E-05 |
| CPIJ011583 | Putative uncharacterized protein            |                                                            | 3,328 | 0,000 | 16,949   | 0,598 | 5,569  | 2,567E-08 |
| CPIJ001282 | Putative uncharacterized protein            | Hexosyltransferase                                         | 3,376 | 0,000 | 8,132    | 0,720 | 4,689  | 2,740E-06 |
| CPIJ005640 | Heat shock protein 26                       |                                                            | 3,414 | 0,000 | 12,330   | 0,623 | 5,477  | 4,327E-08 |
| CPIJ000495 | Putative uncharacterized protein            |                                                            | 3,446 | 0,001 | 380,044  | 0,846 | 4,072  | 4,653E-05 |
| CPIJ010175 | CYP9J48: cytochrome P450 9J48               |                                                            | 3,455 | 0,000 | 487,500  | 0,748 | 4,618  | 3,879E-06 |
| CPIJ003982 | Putative uncharacterized protein            |                                                            | 3,519 | 0,009 | 21,467   | 1,026 | 3,429  | 6,053E-04 |
| CPIJ000494 | Putative uncharacterized protein            |                                                            | 3,609 | 0,001 | 814,795  | 0,865 | 4,172  | 3,023E-05 |
| CPIJ012752 | cysteine synthase                           |                                                            | 3,630 | 0,000 | 215,331  | 0,355 | 10,216 | 1,679E-24 |
| CPIJ001812 | Sugar transporter                           |                                                            | 3,642 | 0,000 | 23,129   | 0,550 | 6,623  | 3,527E-11 |
| CPIJ000500 | Putative uncharacterized protein            |                                                            | 3,812 | 0,000 | 664,750  | 0,309 | 12,334 | 5,939E-35 |
| CPIJ004731 | Putative uncharacterized protein            | Chitin-binding type-2 domain-containing protein            | 3,880 | 0,000 | 7,839    | 0,810 | 4,793  | 1,646E-06 |
| CPIJ000093 | Putative uncharacterized protein            |                                                            | 4,390 | 0,000 | 9,343    | 0,855 | 5,137  | 2,786E-07 |
| CPIJ006306 | Ion channel nompC                           |                                                            | 4,429 | 0,000 | 21,873   | 0,608 | 7,282  | 3,283E-13 |
| CPIJ016319 | Endocuticle structural glycoprotein SgAbd-2 |                                                            | 4,582 | 0,005 | 22,126   | 1,265 | 3,622  | 2,918E-04 |
| CPIJ000496 | Putative uncharacterized protein            | Secreted protein                                           | 4,631 | 0,000 | 2351,552 | 0,785 | 5,897  | 3,694E-09 |
| CPIJ010801 | carboxypeptidase B precursor                |                                                            | 4,666 | 0,000 | 42,604   | 0,490 | 9,532  | 1,540E-21 |
| CPIJ016325 | Putative uncharacterized protein            | Pupal cuticle protein                                      | 5,024 | 0,000 | 22,178   | 0,813 | 6,182  | 6,342E-10 |
| CPIJ012573 | Actin                                       |                                                            | 5,137 | 0,003 | 118,140  | 1,347 | 3,814  | 1,367E-04 |
| CPIJ001979 | Putative uncharacterized protein            | Peptidase S1 domain-containing protein                     | 5,943 | 0,000 | 7,371    | 1,289 | 4,611  | 4,003E-06 |
| CPIJ000534 | Putative uncharacterized protein            |                                                            | 6,703 | 0,000 | 6,421    | 1,288 | 5,206  | 1,927E-07 |

|                                                               |       |       |         |       |       |           |
|---------------------------------------------------------------|-------|-------|---------|-------|-------|-----------|
| CPIJ001820 larval serum protein 2 precursor                   | 6,892 | 0,041 | 56,851  | 2,398 | 2,874 | 4,048E-03 |
| CPIJ002522 farnesol dehydrogenase                             | 7,344 | 0,000 | 18,691  | 1,231 | 5,968 | 2,405E-09 |
| CPIJ013538 ficolin-1 precursor                                | 7,644 | 0,000 | 22,331  | 1,231 | 6,209 | 5,326E-10 |
| CPIJ000344 39S ribosomal protein L24, mitochondrial precursor | 7,812 | 0,000 | 13,896  | 1,255 | 6,223 | 4,868E-10 |
| CPIJ013861 Putative uncharacterized protein                   | 8,552 | 0,000 | 21,898  | 1,226 | 6,975 | 3,053E-12 |
| CPIJ009033 arylphorin subunit C223 precursor                  | 9,714 | NA    | 195,909 | 2,379 | 4,083 | NA        |

**Table S5.** Gene enrichment analysis with Gene Ontology (GO) terms and InterPro protein domain descriptions using differentially expressed genes from two *Culex quinquefasciatus* Bin-resistant strains (REC and REC-2), compared to a susceptible strain (S). Genes with log2 fold change equal to or greater than 1, and false discovery rates (FDR) corrected P-values lower than 0.05 were used.

(A) REC X S up and down regulated genes.

| Category         | Term                                                     | Count | %    | PValue   | Genes                                                                                                                                                                                                                                                                                                                                                                                                                                                                                                                                          | List Total | Pop Hits | Pop Total | Enrichment | Bonferroni | Benjamini  | FDR         |
|------------------|----------------------------------------------------------|-------|------|----------|------------------------------------------------------------------------------------------------------------------------------------------------------------------------------------------------------------------------------------------------------------------------------------------------------------------------------------------------------------------------------------------------------------------------------------------------------------------------------------------------------------------------------------------------|------------|----------|-----------|------------|------------|------------|-------------|
| INTERPRO         | IPR001128:Cytochrome P450                                | 40    | 6,53 | 4,93E-17 | CPIJ012685, CPIJ009474, CPIJ016849, CPIJ010480, CPIJ020229, CPIJ016848, CPIJ006721, CPIJ003376, CPIJ009478, CPIJ005957, CPIJ005958, CPIJ005959, CPIJ001757, CPIJ001758, CPIJ005955, CPIJ010548, CPIJ005956, CPIJ017014, CPIJ010546, CPIJ001759, CPIJ019673, CPIJ010541, CPIJ010231, CPIJ010230, CPIJ010175, CPIJ016854, CPIJ016855, CPIJ015428, CPIJ001380, CPIJ020199, CPIJ004411, CPIJ002535, CPIJ002536, CPIJ010538, CPIJ002537, CPIJ010537, CPIJ017243, CPIJ016852, CPIJ016853, CPIJ015223                                                 | 546        | 204      | 14161     | 5,085      | 3,84E-14   | 3,85E-14   | 3,81E-14    |
| INTERPRO         | IPR017972:Cytochrome P450, conserved site                | 36    | 5,87 | 3,29E-16 | CPIJ009474, CPIJ016849, CPIJ010480, CPIJ020229, CPIJ016848, CPIJ006721, CPIJ003376, CPIJ009478, CPIJ005957, CPIJ005958, CPIJ005959, CPIJ001757, CPIJ001758, CPIJ005955, CPIJ010548, CPIJ005956, CPIJ017014, CPIJ010546, CPIJ019673, CPIJ010541, CPIJ010231, CPIJ010230, CPIJ010175, CPIJ016854, CPIJ016855, CPIJ015428, CPIJ001380, CPIJ004411, CPIJ002535, CPIJ002536, CPIJ010538, CPIJ002537, CPIJ010537, CPIJ017243, CPIJ016852, CPIJ016853, CPIJ015223                                                                                     | 546        | 173      | 14161     | 5,397      | 2,59E-13   | 1,28E-13   | 1,27E-13    |
| GOTERM_MF_DIRECT | GO:0005506~iron ion binding                              | 45    | 7,34 | 1,07E-15 | CPIJ012685, CPIJ009474, CPIJ016849, CPIJ010480, CPIJ020229, CPIJ016848, CPIJ006721, CPIJ009637, CPIJ013919, CPIJ003376, CPIJ009478, CPIJ005957, CPIJ005958, CPIJ005959, CPIJ001757, CPIJ001758, CPIJ005955, CPIJ010548, CPIJ005956, CPIJ017014, CPIJ010546, CPIJ001759, CPIJ019673, CPIJ010541, CPIJ010231, CPIJ010230, CPIJ010175, CPIJ016854, CPIJ016855, CPIJ015428, CPIJ001380, CPIJ020056, CPIJ020199, CPIJ004411, CPIJ002535, CPIJ002536, CPIJ010538, CPIJ002537, CPIJ010537, CPIJ017243, CPIJ010456, CPIJ016852, CPIJ016853, CPIJ015223 | 412        | 251      | 9432      | 4,104      | 2,62E-13   | 2,52E-13   | 2,49E-13    |
| GOTERM_MF_DIRECT | GO:0016705~oxidoreductase activity, acting on paired don | 40    | 6,53 | 5,75E-15 | CPIJ012685, CPIJ009474, CPIJ016849, CPIJ010480, CPIJ020229, CPIJ016848, CPIJ006721, CPIJ003376, CPIJ009478, CPIJ005957, CPIJ005958, CPIJ005959, CPIJ001757, CPIJ001758, CPIJ005955, CPIJ010548, CPIJ005956, CPIJ017014, CPIJ010546, CPIJ001759, CPIJ019673, CPIJ010541, CPIJ010231, CPIJ010230, CPIJ010175, CPIJ016854, CPIJ016855, CPIJ015428, CPIJ001380, CPIJ020199, CPIJ004411, CPIJ002535, CPIJ002536, CPIJ010538, CPIJ002537, CPIJ010537, CPIJ017243, CPIJ016852, CPIJ016853, CPIJ015223                                                 | 412        | 209      | 9432      | 4,381      | 1,36E-12   | 6,43E-13   | 6,34E-13    |
| GOTERM_MF_DIRECT | GO:0020037~heme binding                                  | 43    | 7,01 | 8,17E-15 | CPIJ012685, CPIJ009474, CPIJ016849, CPIJ010480, CPIJ020229, CPIJ016848, CPIJ006721, CPIJ003376, CPIJ009478, CPIJ002864, CPIJ005957, CPIJ005958, CPIJ005959, CPIJ001757, CPIJ001758, CPIJ005955, CPIJ010548, CPIJ005956, CPIJ017014, CPIJ010546, CPIJ001759, CPIJ019673, CPIJ010541, CPIJ010231, CPIJ010230, CPIJ010175, CPIJ016854, CPIJ016855, CPIJ015428, CPIJ007566, CPIJ001380, CPIJ020199, CPIJ004411, CPIJ001764, CPIJ002535, CPIJ002536, CPIJ010538, CPIJ002537, CPIJ010537, CPIJ017243, CPIJ016852, CPIJ016853, CPIJ015223             | 412        | 243      | 9432      | 4,051      | 1,94E-12   | 6,43E-13   | 6,34E-13    |
| GOTERM_MF_DIRECT | GO:0004497~monooxygenase activity                        | 40    | 6,53 | 9,69E-14 | CPIJ012685, CPIJ009474, CPIJ016849, CPIJ010480, CPIJ020229, CPIJ016848, CPIJ006721, CPIJ003376, CPIJ009478, CPIJ005957, CPIJ005958, CPIJ005959, CPIJ001757, CPIJ001758, CPIJ005955, CPIJ010548, CPIJ005956, CPIJ017014, CPIJ010546, CPIJ001759, CPIJ019673, CPIJ010541, CPIJ010231, CPIJ010230, CPIJ010175, CPIJ016854, CPIJ016855, CPIJ015428, CPIJ001380, CPIJ020199, CPIJ004411, CPIJ002535, CPIJ002536, CPIJ010538, CPIJ002537, CPIJ010537, CPIJ017243, CPIJ016852, CPIJ016853, CPIJ015223                                                 | 412        | 227      | 9432      | 4,034      | 2,29E-11   | 5,72E-12   | 5,65E-12    |
| INTERPRO         | IPR002401:Cytochrome P450, E-class, group I              | 30    | 4,89 | 5,70E-12 | CPIJ012685, CPIJ009474, CPIJ016849, CPIJ020229, CPIJ016848, CPIJ006721, CPIJ003376, CPIJ009478, CPIJ005957, CPIJ005958, CPIJ005959, CPIJ001757, CPIJ001758, CPIJ005955, CPIJ005956, CPIJ010546, CPIJ010541, CPIJ010231, CPIJ010230, CPIJ010175, CPIJ016854, CPIJ015428, CPIJ001380, CPIJ004411, CPIJ002535, CPIJ010538, CPIJ002537, CPIJ010537, CPIJ017243, CPIJ015223                                                                                                                                                                         | 546        | 165      | 14161     | 4,716      | 4,44E-09   | 1,48E-09   | 1,47E-09    |
| INTERPRO         | IPR004045:Glutathione S-transferase, N-terminal          | 10    | 1,63 | 1,31E-05 | CPIJ018627, CPIJ002678, CPIJ002675, CPIJ018626, CPIJ002676, CPIJ020053, CPIJ009240, CPIJ018629, CPIJ002680, CPIJ018624                                                                                                                                                                                                                                                                                                                                                                                                                         | 546        | 39       | 14161     | 6,650      | 0,01013212 | 0,0025492  | 0,002523055 |
| GOTERM_BP_DIRECT | GO:0006749~glutathione metabolic process                 | 10    | 1,63 | 1,77E-05 | CPIJ018627, CPIJ002678, CPIJ002675, CPIJ018626, CPIJ002676, CPIJ020053, CPIJ009240, CPIJ018629, CPIJ002680, CPIJ018624                                                                                                                                                                                                                                                                                                                                                                                                                         | 206        | 40       | 5220      | 6,335      | 0,00283964 | 0,002826   | 0,002825995 |
| INTERPRO         | IPR004046:Glutathione S-transferase, C-terminal          | 9     | 1,47 | 3,42E-05 | CPIJ018627, CPIJ002678, CPIJ002675, CPIJ018626, CPIJ002676, CPIJ020053, CPIJ009240, CPIJ018629, CPIJ018624                                                                                                                                                                                                                                                                                                                                                                                                                                     | 546        | 34       | 14161     | 6,865      | 0,02631467 | 0,00445015 | 0,004404504 |

|                  |                                                            |     |       |            |                                                                                                                                                                                                                                                                                                                                                                                                                                                                                                                                                                                                                                                                                                                                                                                                                                                                                                                                                                                                                                                                                                                                                                                                                                                                                                                                                                                                                                                                                                                                                                                                                                                                                                            |     |      |       |        |            |            |             |
|------------------|------------------------------------------------------------|-----|-------|------------|------------------------------------------------------------------------------------------------------------------------------------------------------------------------------------------------------------------------------------------------------------------------------------------------------------------------------------------------------------------------------------------------------------------------------------------------------------------------------------------------------------------------------------------------------------------------------------------------------------------------------------------------------------------------------------------------------------------------------------------------------------------------------------------------------------------------------------------------------------------------------------------------------------------------------------------------------------------------------------------------------------------------------------------------------------------------------------------------------------------------------------------------------------------------------------------------------------------------------------------------------------------------------------------------------------------------------------------------------------------------------------------------------------------------------------------------------------------------------------------------------------------------------------------------------------------------------------------------------------------------------------------------------------------------------------------------------------|-----|------|-------|--------|------------|------------|-------------|
|                  |                                                            |     |       |            | CPIJ016855, CPIJ010480, CPIJ005168, CPIJ003198, CPIJ005257, CPIJ006347, CPIJ011727, CPIJ005137, CPIJ002176, CPIJ001505, CPIJ010538, CPIJ002536, CPIJ010548, CPIJ017014, CPIJ018234, CPIJ019673                                                                                                                                                                                                                                                                                                                                                                                                                                                                                                                                                                                                                                                                                                                                                                                                                                                                                                                                                                                                                                                                                                                                                                                                                                                                                                                                                                                                                                                                                                             | 272 | 146  | 7637  | 2,885  | 0,03882279 | 0,03958363 | 0,039583632 |
| GOTERM_CC_DIRECT | GO:0005789~endoplasmic reticulum membrane                  | 15  | 2,45  | 6,49E-04   | CPIJ007828, CPIJ002073, CPIJ013917, CPIJ016341, CPIJ015373, CPIJ013918                                                                                                                                                                                                                                                                                                                                                                                                                                                                                                                                                                                                                                                                                                                                                                                                                                                                                                                                                                                                                                                                                                                                                                                                                                                                                                                                                                                                                                                                                                                                                                                                                                     | 412 | 47   | 9432  | 4,384  | 0,18289932 | 0,04038131 | 0,039867987 |
| GOTERM_MF_DIRECT | GO:0052689~carboxylic ester hydrolase activity             | 9   | 1,47  | 8,56E-04   | CPIJ012204, CPIJ011854, CPIJ008074, CPIJ001041, CPIJ008853, CPIJ004324, CPIJ008531, CPIJ008079, CPIJ004323, CPIJ002066, CPIJ003661, CPIJ000007, CPIJ0009935, CPIJ008959, CPIJ013082, CPIJ013173, CPIJ016362                                                                                                                                                                                                                                                                                                                                                                                                                                                                                                                                                                                                                                                                                                                                                                                                                                                                                                                                                                                                                                                                                                                                                                                                                                                                                                                                                                                                                                                                                                | 206 | 162  | 5220  | 2,659  | 0,08538217 | 0,04433503 | 0,044335027 |
| GOTERM_BP_DIRECT | GO:0005975~carbohydrate metabolic process                  | 17  | 2,77  | 5,54E-04   | CPIJ012697, CPIJ012699, CPIJ010972, CPIJ004173, CPIJ012700, CPIJ010308, CPIJ012702, CPIJ010307, CPIJ010305, CPIJ010313                                                                                                                                                                                                                                                                                                                                                                                                                                                                                                                                                                                                                                                                                                                                                                                                                                                                                                                                                                                                                                                                                                                                                                                                                                                                                                                                                                                                                                                                                                                                                                                     | 546 | 63   | 14161 | 4,117  | 0,39398049 | 0,07161784 | 0,070883294 |
| INTERPRO         | IPR004119:Protein of unknown function DUF227               | 10  | 1,63  | 6,43E-04   | CPIJ016855, CPIJ010480, CPIJ002536, CPIJ010538, CPIJ010548, CPIJ017014, CPIJ019673                                                                                                                                                                                                                                                                                                                                                                                                                                                                                                                                                                                                                                                                                                                                                                                                                                                                                                                                                                                                                                                                                                                                                                                                                                                                                                                                                                                                                                                                                                                                                                                                                         | 546 | 20   | 14161 | 7,781  | 0,46167169 | 0,0774794  | 0,076684744 |
| INTERPRO         | IPR002403:Cytochrome P450, E-class, group IV               | 6   | 0,98  | 7,95E-04   | CPIJ012036, CPIJ001049, CPIJ039829, CPIJ009107, CPIJ001052, CPIJ009106, CPIJ001050, CPIJ002590, CPIJ004086                                                                                                                                                                                                                                                                                                                                                                                                                                                                                                                                                                                                                                                                                                                                                                                                                                                                                                                                                                                                                                                                                                                                                                                                                                                                                                                                                                                                                                                                                                                                                                                                 | 412 | 54   | 9432  | 3,816  | 0,40112777 | 0,08535841 | 0,084273349 |
| GOTERM_MF_DIRECT | GO:0008237~metallopeptidase activity                       | 9   | 1,47  | 0,00217013 | CPIJ006361, CPIJ016849, CPIJ016848, CPIJ002043, CPIJ009637, CPIJ008944, CPIJ005957, CPIJ005958, CPIJ005959, CPIJ010629, CPIJ008946, CPIJ005955, CPIJ005956, CPIJ000426, CPIJ013173, CPIJ012364, CPIJ010068, CPIJ010067, CPIJ007581, CPIJ011962, CPIJ011602, CPIJ005168, CPIJ015809, CPIJ006776, CPIJ011727, CPIJ008679, CPIJ000670, CPIJ000032, CPIJ003267, CPIJ002176, CPIJ003661, CPIJ003305, CPIJ001764, CPIJ002336, CPIJ018192, CPIJ004238, CPIJ005728, CPIJ000037, CPIJ007505, CPIJ000039, CPIJ002858, CPIJ000316, CPIJ018234, CPIJ011040, CPIJ005050, CPIJ013752, CPIJ010480, CPIJ011457, CPIJ014208, CPIJ011854, CPIJ008283, CPIJ005697, CPIJ005214, CPIJ004489, CPIJ005692, CPIJ003552, CPIJ006267, CPIJ009939, CPIJ004369, CPIJ001812, CPIJ005612, CPIJ017039, CPIJ018126, CPIJ013401, CPIJ012036, CPIJ011346, CPIJ013923, CPIJ008853, CPIJ001380, CPIJ004373, CPIJ005468, CPIJ002591, CPIJ000611, CPIJ005229, CPIJ010538, CPIJ010537, CPIJ010259, CPIJ004817, CPIJ010412, CPIJ014970, CPIJ017721, CPIJ012204, CPIJ005191, CPIJ008107, CPIJ007652, CPIJ003579, CPIJ019193, CPIJ008109, CPIJ000988, CPIJ010546, CPIJ000906, CPIJ010145, CPIJ010541, CPIJ020199, CPIJ003102, CPIJ004795, CPIJ006575, CPIJ006617, CPIJ002777, CPIJ002535, CPIJ016093, CPIJ017065, CPIJ016097, CPIJ016094, CPIJ002536, CPIJ002537, CPIJ012055, CPIJ018314, CPIJ005492, CPIJ003198, CPIJ005257, CPIJ006347, CPIJ008647, CPIJ005137, CPIJ009976, CPIJ003512, CPIJ017592, CPIJ010842, CPIJ001859, CPIJ012065, CPIJ015730, CPIJ012066, CPIJ012068, CPIJ010175, CPIJ011026, CPIJ012511, CPIJ007566, CPIJ008812, CPIJ009225, CPIJ003007, CPIJ001747, CPIJ001505, CPIJ006912, CPIJ040083, CPIJ000415, CPIJ019789, CPIJ015102 | 272 | 3355 | 7637  | 1,188  | 0,21056429 | 0,11798962 | 0,117989625 |
| GOTERM_CC_DIRECT | GO:0016021~integral component of membrane                  | 142 | 23,16 | 0,00386851 | CPIJ012697, CPIJ012699, CPIJ004173, CPIJ012700, CPIJ010308, CPIJ012702, CPIJ010307, CPIJ010305, CPIJ010313                                                                                                                                                                                                                                                                                                                                                                                                                                                                                                                                                                                                                                                                                                                                                                                                                                                                                                                                                                                                                                                                                                                                                                                                                                                                                                                                                                                                                                                                                                                                                                                                 | 546 | 58   | 14161 | 4,025  | 0,71445175 | 0,13112642 | 0,129781533 |
| INTERPRO         | IPR015897:CHK kinase-like                                  | 9   | 1,47  | 0,00160762 | CPIJ004369, CPIJ000037, CPIJ000039, CPIJ013923, CPIJ004373, CPIJ000032, CPIJ010052, CPIJ008490, CPIJ013539, CPIJ003373, CPIJ015938, CPIJ019550, CPIJ006569, CPIJ006306, CPIJ009924, CPIJ017156, CPIJ000716, CPIJ018694, CPIJ018744                                                                                                                                                                                                                                                                                                                                                                                                                                                                                                                                                                                                                                                                                                                                                                                                                                                                                                                                                                                                                                                                                                                                                                                                                                                                                                                                                                                                                                                                         | 546 | 133  | 14161 | 2,730  | 0,76351606 | 0,13112642 | 0,129781533 |
| INTERPRO         | IPR002110:Ankyrin repeat                                   | 14  | 2,28  | 0,00184922 | CPIJ016849, CPIJ001759, CPIJ016852, CPIJ020199, CPIJ016853                                                                                                                                                                                                                                                                                                                                                                                                                                                                                                                                                                                                                                                                                                                                                                                                                                                                                                                                                                                                                                                                                                                                                                                                                                                                                                                                                                                                                                                                                                                                                                                                                                                 | 546 | 15   | 14161 | 8,645  | 0,80713812 | 0,13717951 | 0,135772545 |
| INTERPRO         | IPR002402:Cytochrome P450, E-class, group II               | 5   | 0,82  | 0,00211045 | CPIJ007828, CPIJ007824, CPIJ002073, CPIJ013917, CPIJ016341, CPIJ013918                                                                                                                                                                                                                                                                                                                                                                                                                                                                                                                                                                                                                                                                                                                                                                                                                                                                                                                                                                                                                                                                                                                                                                                                                                                                                                                                                                                                                                                                                                                                                                                                                                     | 546 | 49   | 14161 | 4,234  | 0,8620825  | 0,15205234 | 0,150492832 |
| INTERPRO         | IPR006195:Aminoacyl-tRNA synthetase, class II              | 5   | 0,82  | 0,00272914 | CPIJ016525, CPIJ017452, CPIJ010486, CPIJ015476, CPIJ015212                                                                                                                                                                                                                                                                                                                                                                                                                                                                                                                                                                                                                                                                                                                                                                                                                                                                                                                                                                                                                                                                                                                                                                                                                                                                                                                                                                                                                                                                                                                                                                                                                                                 | 546 | 16   | 14161 | 8,105  | 0,88103311 | 0,15205234 | 0,150492832 |
| INTERPRO         | IPR019826:Carboxylesterase type B, active site             | 8   | 1,31  | 0,0025399  | CPIJ009107, CPIJ009106, CPIJ008878, CPIJ004086, CPIJ008877, CPIJ006124                                                                                                                                                                                                                                                                                                                                                                                                                                                                                                                                                                                                                                                                                                                                                                                                                                                                                                                                                                                                                                                                                                                                                                                                                                                                                                                                                                                                                                                                                                                                                                                                                                     | 412 | 30   | 9432  | 4,579  | 0,87796463 | 0,2913986  | 0,287694381 |
| GOTERM_MF_DIRECT | GO:0004180~carboxypeptidase activity                       | 6   | 0,98  | 0,0088733  | CPIJ000037, CPIJ000039, CPIJ013923, CPIJ000032, CPIJ003695                                                                                                                                                                                                                                                                                                                                                                                                                                                                                                                                                                                                                                                                                                                                                                                                                                                                                                                                                                                                                                                                                                                                                                                                                                                                                                                                                                                                                                                                                                                                                                                                                                                 | 412 | 20   | 9432  | 5,723  | 0,90393967 | 0,2913986  | 0,287694381 |
| GOTERM_MF_DIRECT | GO:0008194~UDP-glycosyltransferase activity                | 5   | 0,82  | 0,00987792 | CPIJ014889, CPIJ016852, CPIJ016853                                                                                                                                                                                                                                                                                                                                                                                                                                                                                                                                                                                                                                                                                                                                                                                                                                                                                                                                                                                                                                                                                                                                                                                                                                                                                                                                                                                                                                                                                                                                                                                                                                                                         | 272 | 16   | 7637  | 7,019  | 0,66072078 | 0,357137   | 0,357137002 |
| GOTERM_CC_DIRECT | GO:0043231~intracellular membrane-bounded organelle        | 4   | 0,65  | 0,01756411 | CPIJ012159, CPIJ001371, CPIJ009620, CPIJ018314, CPIJ018313                                                                                                                                                                                                                                                                                                                                                                                                                                                                                                                                                                                                                                                                                                                                                                                                                                                                                                                                                                                                                                                                                                                                                                                                                                                                                                                                                                                                                                                                                                                                                                                                                                                 | 546 | 32   | 14161 | 4,863  | 0,99598576 | 0,3670312  | 0,363266774 |
| INTERPRO         | IPR004843:Metallophosphoesterase domain                    | 6   | 0,98  | 0,00705829 | CPIJ009793, CPIJ008588, CPIJ010145                                                                                                                                                                                                                                                                                                                                                                                                                                                                                                                                                                                                                                                                                                                                                                                                                                                                                                                                                                                                                                                                                                                                                                                                                                                                                                                                                                                                                                                                                                                                                                                                                                                                         | 206 | 4    | 5220  | 19,005 | 0,75664971 | 0,46610972 | 0,466109721 |
| GOTERM_BP_DIRECT | GO:0000027~ribosomal large subunit assembly                | 3   | 0,49  | 0,00873956 | CPIJ003802, CPIJ003801, CPIJ013381, CPIJ007228, CPIJ005595                                                                                                                                                                                                                                                                                                                                                                                                                                                                                                                                                                                                                                                                                                                                                                                                                                                                                                                                                                                                                                                                                                                                                                                                                                                                                                                                                                                                                                                                                                                                                                                                                                                 | 546 | 24   | 14161 | 5,403  | 0,99994422 | 0,57325305 | 0,567373529 |
| INTERPRO         | IPR011032:GroES-like                                       | 5   | 0,82  | 0,01249398 | CPIJ012036, CPIJ001049, CPIJ039829, CPIJ001052, CPIJ001050                                                                                                                                                                                                                                                                                                                                                                                                                                                                                                                                                                                                                                                                                                                                                                                                                                                                                                                                                                                                                                                                                                                                                                                                                                                                                                                                                                                                                                                                                                                                                                                                                                                 | 546 | 24   | 14161 | 5,403  | 0,99994422 | 0,57325305 | 0,567373529 |
| INTERPRO         | IPR024571:Domain of unknown function DUF3358               | 5   | 0,82  | 0,01249398 | CPIJ012036, CPIJ001049, CPIJ039829, CPIJ001052, CPIJ001050                                                                                                                                                                                                                                                                                                                                                                                                                                                                                                                                                                                                                                                                                                                                                                                                                                                                                                                                                                                                                                                                                                                                                                                                                                                                                                                                                                                                                                                                                                                                                                                                                                                 | 412 | 26   | 9432  | 4,403  | 0,99735389 | 0,5967337  | 0,589148104 |
| GOTERM_MF_DIRECT | GO:0004177~aminopeptidase activity                         | 5   | 0,82  | 0,02483333 | CPIJ008702, CPIJ007525, CPIJ007524                                                                                                                                                                                                                                                                                                                                                                                                                                                                                                                                                                                                                                                                                                                                                                                                                                                                                                                                                                                                                                                                                                                                                                                                                                                                                                                                                                                                                                                                                                                                                                                                                                                                         | 412 | 6    | 9432  | 11,447 | 0,99762813 | 0,5967337  | 0,589148104 |
| GOTERM_MF_DIRECT | GO:0016671~oxidoreductase activity, acting on a sulfur gro | 3   | 0,49  | 0,02528533 | CPIJ018848, CPIJ004080, CPIJ005508, CPIJ011246, CPIJ002450, CPIJ018377, CPIJ007376, CPIJ009388                                                                                                                                                                                                                                                                                                                                                                                                                                                                                                                                                                                                                                                                                                                                                                                                                                                                                                                                                                                                                                                                                                                                                                                                                                                                                                                                                                                                                                                                                                                                                                                                             | 412 | 68   | 9432  | 2,693  | 0,998756   | 0,59959136 | 0,591969439 |
| GOTERM_MF_DIRECT | GO:0051082~unfolded protein binding                        | 8   | 1,31  | 0,02794706 | CPIJ012036, CPIJ001049, CPIJ039829, CPIJ001052, CPIJ001050                                                                                                                                                                                                                                                                                                                                                                                                                                                                                                                                                                                                                                                                                                                                                                                                                                                                                                                                                                                                                                                                                                                                                                                                                                                                                                                                                                                                                                                                                                                                                                                                                                                 | 546 | 25   | 14161 | 5,187  | 0,99998792 | 0,59998038 | 0,593826737 |
| INTERPRO         | IPR014782:Peptidase M1, membrane alanine aminopeptidas     | 5   | 0,82  | 0,0144313  | CPIJ007581, CPIJ014557, CPIJ017593, CPIJ017592                                                                                                                                                                                                                                                                                                                                                                                                                                                                                                                                                                                                                                                                                                                                                                                                                                                                                                                                                                                                                                                                                                                                                                                                                                                                                                                                                                                                                                                                                                                                                                                                                                                             | 546 | 14   | 14161 | 7,410  | 0,99999247 | 0,59998038 | 0,593826737 |
| INTERPRO         | IPR003010:Carbon-nitrogen hydrolase                        | 4   | 0,65  | 0,01502853 |                                                                                                                                                                                                                                                                                                                                                                                                                                                                                                                                                                                                                                                                                                                                                                                                                                                                                                                                                                                                                                                                                                                                                                                                                                                                                                                                                                                                                                                                                                                                                                                                                                                                                                            |     |      |       |        |            |            |             |

|                                                                         |                                                           |    |      |            |                                                                        |     |     |       |        |            |            |             |
|-------------------------------------------------------------------------|-----------------------------------------------------------|----|------|------------|------------------------------------------------------------------------|-----|-----|-------|--------|------------|------------|-------------|
| CPIJ007828, CPIJ007824, CPIJ002073, CPIJ013917, CPIJ016341, CPIJ013918, |                                                           |    |      |            |                                                                        |     |     |       |        |            |            |             |
| INTERPRO                                                                | IPR002018:Carboxylesterase, type B                        | 9  | 1,47 | 0,01538411 | CPIJ008422                                                             | 546 | 84  | 14161 | 2,779  | 0,99999431 | 0,59998038 | 0,593826737 |
| INTERPRO                                                                | IPR004911:Gamma interferon inducible lysosomal thiol red  | 3  | 0,49 | 0,02000595 | CPIJ008702, CPIJ007525, CPIJ007524                                     | 546 | 6   | 14161 | 12,968 | 0,99999985 | 0,60017859 | 0,594022911 |
| INTERPRO                                                                | IPR004364:Aminoacyl-tRNA synthetase, class II (D/K/N)     | 3  | 0,49 | 0,02000595 | CPIJ017452, CPIJ015476, CPIJ015212                                     | 546 | 6   | 14161 | 12,968 | 0,99999985 | 0,60017859 | 0,594022911 |
| INTERPRO                                                                | IPR023333:Proteasome B-type subunit                       | 3  | 0,49 | 0,02000595 | CPIJ008264, CPIJ001361, CPIJ017386                                     | 546 | 6   | 14161 | 12,968 | 0,99999985 | 0,60017859 | 0,594022911 |
| INTERPRO                                                                | IPR005814:Aminotransferase class-III                      | 3  | 0,49 | 0,02000595 | CPIJ008729, CPIJ006409, CPIJ004400                                     | 546 | 6   | 14161 | 12,968 | 0,99999985 | 0,60017859 | 0,594022911 |
| INTERPRO                                                                | IPR002334:Dol/Ves 1 allergen                              | 3  | 0,49 | 0,02000595 | CPIJ004228, CPIJ001035                                                 | 546 | 6   | 14161 | 12,968 | 0,99999985 | 0,60017859 | 0,594022911 |
| INTERPRO                                                                | IPR016050:Proteasome, beta-type subunit, conserved site   | 3  | 0,49 | 0,02000595 | CPIJ008264, CPIJ001361, CPIJ017386                                     | 546 | 6   | 14161 | 12,968 | 0,99999985 | 0,60017859 | 0,594022911 |
| GOTERM_CC_DIRECT                                                        | GO:0005777~peroxisome                                     | 5  | 0,82 | 0,04089751 | CPIJ001556, CPIJ003456, CPIJ013919, CPIJ000670                         | 272 | 37  | 7637  | 3,794  | 0,92169923 | 0,62368708 | 0,62368708  |
|                                                                         |                                                           |    |      |            |                                                                        |     |     |       |        |            |            |             |
| GOTERM_MF_DIRECT                                                        | GO:0004553~hydrolase activity, hydrolyzing O-glycosyl cor | 6  | 0,98 | 0,03467925 | CPIJ000007, CPIJ013082, CPIJ008531, CPIJ004324, CPIJ004323, CPIJ002066 | 412 | 42  | 9432  | 3,270  | 0,99975873 | 0,64699576 | 0,638771238 |
| GOTERM_MF_DIRECT                                                        | GO:0016798~hydrolase activity, acting on glycosyl bonds   | 5  | 0,82 | 0,0356396  | CPIJ012159, CPIJ012204, CPIJ011854, CPIJ013173, CPIJ016362             | 412 | 29  | 9432  | 3,947  | 0,99980924 | 0,64699576 | 0,638771238 |
| CPIJ018848, CPIJ004080, CPIJ005508, CPIJ011246, CPIJ002450, CPIJ018377, |                                                           |    |      |            |                                                                        |     |     |       |        |            |            |             |
| GOTERM_BP_DIRECT                                                        | GO:0006457~protein folding                                | 9  | 1,47 | 0,01663414 | CPIJ007228, CPIJ007376, CPIJ009388                                     | 206 | 84  | 5220  | 2,715  | 0,9328362  | 0,66536568 | 0,665365675 |
| GOTERM_CC_DIRECT                                                        | GO:0005783~endoplasmic reticulum                          | 5  | 0,82 | 0,056254   | CPIJ005690, CPIJ002043, CPIJ007327, CPIJ006776, CPIJ005974             | 272 | 41  | 7637  | 3,424  | 0,97074752 | 0,68629877 | 0,686298771 |
|                                                                         |                                                           |    |      |            |                                                                        |     |     |       |        |            |            |             |
| INTERPRO                                                                | IPR013780:Glycosyl hydrolase, family 13, all-beta         | 6  | 0,98 | 0,02391903 | CPIJ012204, CPIJ011854, CPIJ013173, CPIJ008079, CPIJ015654, CPIJ002066 | 546 | 43  | 14161 | 3,619  | 0,99999999 | 0,69099426 | 0,683907137 |
|                                                                         |                                                           |    |      |            |                                                                        |     |     |       |        |            |            |             |
| CPIJ018627, CPIJ002678, CPIJ002675, CPIJ018626, CPIJ002676, CPIJ020053, |                                                           |    |      |            |                                                                        |     |     |       |        |            |            |             |
| GOTERM_MF_DIRECT                                                        | GO:0016740~transferase activity                           | 11 | 1,79 | 0,04194791 | CPIJ018629, CPIJ005168, CPIJ002680, CPIJ018624, CPIJ010486             | 412 | 123 | 9432  | 2,047  | 0,99995946 | 0,70096987 | 0,692059233 |
| GOTERM_MF_DIRECT                                                        | GO:0008241~peptidyl-dipeptidase activity                  | 3  | 0,49 | 0,04455317 | CPIJ009107, CPIJ009106, CPIJ004086                                     | 412 | 8   | 9432  | 8,585  | 0,99997868 | 0,70096987 | 0,692059233 |
| CPIJ012204, CPIJ000007, CPIJ011854, CPIJ013082, CPIJ001041, CPIJ013173, |                                                           |    |      |            |                                                                        |     |     |       |        |            |            |             |
| INTERPRO                                                                | IPR017853:Glycoside hydrolase, superfamily                | 10 | 1,63 | 0,025947   | CPIJ016362, CPIJ008531, CPIJ008079, CPIJ002066                         | 546 | 110 | 14161 | 2,358  | 1          | 0,72280935 | 0,715395917 |
| GOTERM_BP_DIRECT                                                        | GO:0042254~ribosome biogenesis                            | 4  | 0,65 | 0,02290052 | CPIJ012888, CPIJ007556, CPIJ005818, CPIJ010674                         | 206 | 16  | 5220  | 6,335  | 0,97600372 | 0,73281666 | 0,732816656 |
| INTERPRO                                                                | IPR004365:Nucleic acid binding, OB-fold, tRNA/helicase-ty | 3  | 0,49 | 0,02730157 | CPIJ017452, CPIJ015476, CPIJ015212                                     | 546 | 7   | 14161 | 11,115 | 1          | 0,7343181  | 0,72678663  |
| CPIJ007581, CPIJ017592, CPIJ011190, CPIJ003384, CPIJ005468, CPIJ011185, |                                                           |    |      |            |                                                                        |     |     |       |        |            |            |             |
| GOTERM_MF_DIRECT                                                        | GO:0016787~hydrolase activity                             | 10 | 1,63 | 0,05276194 | CPIJ018314, CPIJ015662, CPIJ007311                                     | 412 | 111 | 9432  | 2,062  | 0,99999722 | 0,77115764 | 0,761354788 |
| GOTERM_MF_DIRECT                                                        | GO:0004298~threonine-type endopeptidase activity          | 3  | 0,49 | 0,0556631  | CPIJ008264, CPIJ001361, CPIJ017386                                     | 412 | 9   | 9432  | 7,631  | 0,99999865 | 0,77115764 | 0,761354788 |
| GOTERM_MF_DIRECT                                                        | GO:0071949~FAD binding                                    | 5  | 0,82 | 0,05881711 | CPIJ001556, CPIJ009956, CPIJ013919, CPIJ000670                         | 412 | 34  | 9432  | 3,367  | 0,99999939 | 0,77115764 | 0,761354788 |
| INTERPRO                                                                | IPR001353:Proteasome, subunit alpha/beta                  | 4  | 0,65 | 0,03007295 | CPIJ008264, CPIJ001361, CPIJ017386, CPIJ007179                         | 546 | 18  | 14161 | 5,764  | 1          | 0,78189665 | 0,773877201 |
| CPIJ004228, CPIJ002103, CPIJ004230, CPIJ010979, CPIJ001035, CPIJ004224, |                                                           |    |      |            |                                                                        |     |     |       |        |            |            |             |
| GOTERM_BP_DIRECT                                                        | GO:0006629~lipid metabolic process                        | 8  | 1,31 | 0,03254897 | CPIJ004223                                                             | 206 | 78  | 5220  | 2,599  | 0,99514412 | 0,83112017 | 0,831120168 |
| GOTERM_BP_DIRECT                                                        | GO:0006807~nitrogen compound metabolic process            | 4  | 0,65 | 0,03636151 | CPIJ007581, CPIJ014557, CPIJ017593, CPIJ017592                         | 206 | 19  | 5220  | 5,335  | 0,99742856 | 0,83112017 | 0,831120168 |
| GOTERM_BP_DIRECT                                                        | GO:0007017~microtubule-based process                      | 4  | 0,65 | 0,04157476 | CPIJ003259, CPIJ015623, CPIJ006724, CPIJ011550                         | 206 | 20  | 5220  | 5,068  | 0,99892632 | 0,83149526 | 0,831495257 |
| INTERPRO                                                                | IPR019742:Alpha-2-macroglobulin, conserved site           | 3  | 0,49 | 0,03548659 | CPIJ001747                                                             | 546 | 8   | 14161 | 9,726  | 1          | 0,86498561 | 0,856113961 |
| INTERPRO                                                                | IPR001548:Peptidase M2, peptidyl-dipeptidase A            | 3  | 0,49 | 0,03548659 | CPIJ009107, CPIJ009106, CPIJ004086                                     | 546 | 8   | 14161 | 9,726  | 1          | 0,86498561 | 0,856113961 |
|                                                                         |                                                           |    |      |            |                                                                        |     |     |       |        |            |            |             |
| GOTERM_CC_DIRECT                                                        | GO:0005730~nucleolus                                      | 6  | 0,98 | 0,08853239 | CPIJ009793, CPIJ012888, CPIJ007556, CPIJ005818, CPIJ010674, CPIJ008588 | 272 | 67  | 7637  | 2,514  | 0,99649881 | 0,89737837 | 0,897378369 |
| INTERPRO                                                                | IPR020837:Fibrinogen, conserved site                      | 4  | 0,65 | 0,03970883 | CPIJ006041, CPIJ007727, CPIJ014772, CPIJ012829                         | 546 | 20  | 14161 | 5,187  | 1          | 0,93857226 | 0,928945881 |
| GOTERM_MF_DIRECT                                                        | GO:0000166~nucleotide binding                             | 5  | 0,82 | 0,0757798  | CPIJ011687, CPIJ006734, CPIJ018314, CPIJ018313                         | 412 | 37  | 9432  | 3,094  | 0,99999999 | 0,94126494 | 0,929299703 |
| GOTERM_MF_DIRECT                                                        | GO:0004866~endopeptidase inhibitor activity               | 3  | 0,49 | 0,08032723 | CPIJ001747                                                             | 412 | 11  | 9432  | 6,244  | 1          | 0,94786127 | 0,935812181 |
| INTERPRO                                                                | IPR006047:Glycosyl hydrolase, family 13, catalytic domain | 5  | 0,82 | 0,0442756  | CPIJ012204, CPIJ011854, CPIJ013173, CPIJ016362, CPIJ008079             | 546 | 35  | 14161 | 3,705  | 1          | 0,9495454  | 0,939806469 |
| INTERPRO                                                                | IPR002890:Alpha-2-macroglobulin, N-terminal               | 3  | 0,49 | 0,044482   | CPIJ001747                                                             | 546 | 9   | 14161 | 8,645  | 1          | 0,9495454  | 0,939806469 |
| INTERPRO                                                                | IPR020843:Polyketide synthase, enoylreductase             | 4  | 0,65 | 0,04504254 | CPIJ003802, CPIJ003801, CPIJ013381, CPIJ005595                         | 546 | 21  | 14161 | 4,940  | 1          | 0,9495454  | 0,939806469 |
| INTERPRO                                                                | IPR001930:Peptidase M1, alanine aminopeptidase/leukotrie  | 4  | 0,65 | 0,04504254 | CPIJ001049, CPIJ039829, CPIJ001052, CPIJ001050                         | 546 | 21  | 14161 | 4,940  | 1          | 0,9495454  | 0,939806469 |
| GOTERM_MF_DIRECT                                                        | GO:0017172~cysteine dioxygenase activity                  | 2  | 0,33 | 0,08525576 | CPIJ010456, CPIJ020056                                                 | 412 | 2   | 9432  | 22,893 | 1          | 0,95811235 | 0,945932958 |
| INTERPRO                                                                | IPR020845:AMP-binding, conserved site                     | 5  | 0,82 | 0,04835328 | CPIJ011600, CPIJ002867, CPIJ016639, CPIJ000426, CPIJ015670             | 546 | 36  | 14161 | 3,602  | 1          | 0,9925146  | 0,982334965 |
| INTERPRO                                                                | IPR014710:RmlC-like jelly roll fold                       | 5  | 0,82 | 0,05263128 | CPIJ003198, CPIJ010259, CPIJ010456, CPIJ020056                         | 546 | 37  | 14161 | 3,505  | 1          | 1          | 0,991014121 |
| INTERPRO                                                                | IPR009048:Alpha-macroglobulin, receptor-binding           | 3  | 0,49 | 0,05421356 | CPIJ001747                                                             | 546 | 10  | 14161 | 7,781  | 1          | 1          | 0,991014121 |
| INTERPRO                                                                | IPR008334:5'-Nucleotidase, C-terminal                     | 3  | 0,49 | 0,05421356 | CPIJ018314, CPIJ018313                                                 | 546 | 10  | 14161 | 7,781  | 1          | 1          | 0,991014121 |
| INTERPRO                                                                | IPR001599:Alpha-2-macroglobulin                           | 3  | 0,49 | 0,05421356 | CPIJ001747                                                             | 546 | 10  | 14161 | 7,781  | 1          | 1          | 0,991014121 |
| CPIJ001812, CPIJ014208, CPIJ008946, CPIJ000988, CPIJ008812, CPIJ008944, |                                                           |    |      |            |                                                                        |     |     |       |        |            |            |             |
| INTERPRO                                                                | IPR020846:Major facilitator superfamily domain            | 9  | 1,47 | 0,05658855 | CPIJ004817, CPIJ007652                                                 | 546 | 108 | 14161 | 2,161  | 1          | 1          | 0,991014121 |
| INTERPRO                                                                | IPR025110:Domain of unknown function DUF4009              | 5  | 0,82 | 0,05710842 | CPIJ011600, CPIJ002867, CPIJ016639, CPIJ000426, CPIJ015670             | 546 | 38  | 14161 | 3,413  | 1          | 1          | 0,991014121 |
| INTERPRO                                                                | IPR006179:5'-Nucleotidase/apyrase                         | 3  | 0,49 | 0,06461149 | CPIJ018314, CPIJ018313                                                 | 546 | 11  | 14161 | 7,073  | 1          | 1          | 0,991014121 |
| INTERPRO                                                                | IPR002194:Chaperonin TCP-1, conserved site                | 3  | 0,49 | 0,06461149 | CPIJ004080, CPIJ002450, CPIJ018377                                     | 546 | 11  | 14161 | 7,073  | 1          | 1          | 0,991014121 |
| INTERPRO                                                                | IPR011626:A-macroglobulin complement component            | 3  | 0,49 | 0,06461149 | CPIJ001747                                                             | 546 | 11  | 14161 | 7,073  | 1          | 1          | 0,991014121 |
| INTERPRO                                                                | IPR011625:Alpha-2-macroglobulin, N-terminal 2             | 3  | 0,49 | 0,06461149 | CPIJ001747                                                             | 546 | 11  | 14161 | 7,073  | 1          | 1          | 0,991014121 |
| INTERPRO                                                                | IPR000808:Mrp, conserved site                             | 2  | 0,33 | 0,07549341 | CPIJ017390, CPIJ014142                                                 | 546 | 2   | 14161 | 25,936 | 1          | 1          | 0,991014121 |
| INTERPRO                                                                | IPR010300:Cysteine dioxygenase type I                     | 2  | 0,33 | 0,07549341 | CPIJ010456, CPIJ020056                                                 | 546 | 2   | 14161 | 25,936 | 1          | 1          | 0,991014121 |
| INTERPRO                                                                | IPR019172:Osteopetrosis-associated transmembrane protein  | 2  | 0,33 | 0,07549341 | CPIJ016093, CPIJ016094                                                 | 546 | 2   | 14161 | 25,936 | 1          | 1          | 0,991014121 |
| INTERPRO                                                                | IPR003950:Potassium channel, voltage-dependent, ELK       | 2  | 0,33 | 0,07549341 | CPIJ010259                                                             | 546 | 2   | 14161 | 25,936 | 1          | 1          | 0,991014121 |
| INTERPRO                                                                | IPR020904:Short-chain dehydrogenase/reductase, conserve   | 5  | 0,82 | 0,07697065 | CPIJ016922, CPIJ011026, CPIJ002522, CPIJ007736, CPIJ005655             | 546 | 42  | 14161 | 3,088  | 1          | 1          | 0,991014121 |
| GOTERM_BP_DIRECT                                                        | GO:0042412~taurine biosynthetic process                   | 2  | 0,33 | 0,077009   | CPIJ010456, CPIJ020056                                                 | 206 | 2   | 5220  | 25,340 | 0,99999751 | 1          | 1           |



|                  |                                             |   |      |            |                                                                        |     |    |       |        |            |   |             |
|------------------|---------------------------------------------|---|------|------------|------------------------------------------------------------------------|-----|----|-------|--------|------------|---|-------------|
| GOTERM_BP_DIRECT | GO:0006839~mitochondrial transport          | 2 | 0,33 | 0,077009   | CPIJ004238, CPIJ004795                                                 | 206 | 2  | 5220  | 25,340 | 0,99999751 | 1 | 1           |
| GOTERM_BP_DIRECT | GO:0009166~nucleotide catabolic process     | 3 | 0,49 | 0,07820416 | CPIJ018314, CPIJ018313                                                 | 206 | 12 | 5220  | 6,335  | 0,99999798 | 1 | 1           |
| INTERPRO         | IPR017871:ABC transporter, conserved site   | 6 | 0,98 | 0,08047091 | CPIJ011962, CPIJ016097, CPIJ008283, CPIJ012364, CPIJ010068, CPIJ010067 | 546 | 60 | 14161 | 2,594  | 1          | 1 | 0,991014121 |
| INTERPRO         | IPR013818:Lipase, N-terminal                | 6 | 0,98 | 0,08972793 | CPIJ004228, CPIJ004230, CPIJ001035, CPIJ004224, CPIJ004223             | 546 | 62 | 14161 | 2,510  | 1          | 1 | 0,991014121 |
| INTERPRO         | IPR000175:Sodium:neurotransmitter symporter | 4 | 0,65 | 0,09128847 | CPIJ012065, CPIJ003267, CPIJ012055, CPIJ012066                         | 546 | 28 | 14161 | 3,705  | 1          | 1 | 0,991014121 |
| INTERPRO         | IPR000734:Lipase                            | 6 | 0,98 | 0,09455459 | CPIJ004228, CPIJ004230, CPIJ001035, CPIJ004224, CPIJ004223             | 546 | 63 | 14161 | 2,470  | 1          | 1 | 0,991014121 |
| INTERPRO         | IPR002423:Chaperonin Cpn60/TCP-1            | 4 | 0,65 | 0,09904984 | CPIJ004080, CPIJ002450, CPIJ018377, CPIJ009388                         | 546 | 29 | 14161 | 3,577  | 1          | 1 | 0,991014121 |
| INTERPRO         | IPR008758:Peptidase S28                     | 3 | 0,49 | 0,0991685  | CPIJ008878, CPIJ008877, CPIJ006124                                     | 546 | 14 | 14161 | 5,558  | 1          | 1 | 0,991014121 |
| INTERPRO         | IPR001604:DNA/RNA non-specific endonuclease | 3 | 0,49 | 0,0991685  | CPIJ011190, CPIJ003384, CPIJ011185                                     | 546 | 14 | 14161 | 5,558  | 1          | 1 | 0,991014121 |
| INTERPRO         | IPR013149:Alcohol dehydrogenase, C-terminal | 3 | 0,49 | 0,0991685  | CPIJ003802, CPIJ003801, CPIJ013381                                     | 546 | 14 | 14161 | 5,558  | 1          | 1 | 0,991014121 |
| INTERPRO         | IPR000873:AMP-dependent synthetase/ligase   | 5 | 0,82 | 0,09982404 | CPIJ011600, CPIJ002867, CPIJ016639, CPIJ000426, CPIJ015670             | 546 | 46 | 14161 | 2,819  | 1          | 1 | 0,991014121 |

**Table S5.** Gene enrichment analysis with Gene Ontology (GO) terms and InterPro protein domain descriptions using differentially expressed genes from two *Culex quinquefasciatus* Bin-resistant strains (REC and REC-2), compared to a susceptible strain (S). Genes with log2 fold change equal to or greater than 1, and false discovery rates (FDR) corrected P-values lower than 0.05 were used.  
**(B)** REC-2 X S up and down regulated genes.

| Category         | Term                                                               | Count | %    | PValue   | Genes                                                                                                                                                                                                                                                                                                                                                                                                                                                                                                                                                                                                                                                                  | List Tot | Pop Hits | Pop Total | Fold Enrichment | Bonferroni  | Benjamini | FDR      |
|------------------|--------------------------------------------------------------------|-------|------|----------|------------------------------------------------------------------------------------------------------------------------------------------------------------------------------------------------------------------------------------------------------------------------------------------------------------------------------------------------------------------------------------------------------------------------------------------------------------------------------------------------------------------------------------------------------------------------------------------------------------------------------------------------------------------------|----------|----------|-----------|-----------------|-------------|-----------|----------|
| GOTERM_MF_DIRECT | GO:0005506--iron ion binding                                       | 33    | 6,86 | 2,16E-11 | CPIJ001757, CPIJ001758, CPIJ005956, CPIJ017014, CPIJ010546, CPIJ001759, CPIJ014220, CPIJ010544, CPIJ019673, CPIJ014221, CPIJ010541, CPIJ010231, CPIJ010175, CPIJ017306, CPIJ016855, CPIJ011127, CPIJ014219, CPIJ019704, CPIJ015428, CPIJ003082, CPIJ003361, CPIJ020199, CPIJ004411, CPIJ010538, CPIJ016846, CPIJ020229, CPIJ016848, CPIJ009478, CPIJ001757, CPIJ001758, CPIJ005956, CPIJ017014, CPIJ010546, CPIJ001759, CPIJ014220, CPIJ010544, CPIJ019673, CPIJ014221, CPIJ010541, CPIJ010231, CPIJ010175, CPIJ016855, CPIJ011127, CPIJ014219, CPIJ019704, CPIJ015428, CPIJ003082, CPIJ003361, CPIJ020199, CPIJ004411, CPIJ010538, CPIJ019702, CPIJ016852, CPIJ016853 | 306      | 251      | 9432      | 4,052           | 3,76E-09    | 3,76E-09  | 3,67E-09 |
|                  |                                                                    |       |      |          |                                                                                                                                                                                                                                                                                                                                                                                                                                                                                                                                                                                                                                                                        |          |          |           |                 |             |           |          |
|                  |                                                                    |       |      |          |                                                                                                                                                                                                                                                                                                                                                                                                                                                                                                                                                                                                                                                                        |          |          |           |                 |             |           |          |
| INTERPRO         | IPR001128:Cytochrome P450                                          | 28    | 5,82 | 5,23E-11 | CPIJ004411, CPIJ010538, CPIJ019702, CPIJ016852, CPIJ016853, CPIJ016846, CPIJ020229, CPIJ016848, CPIJ009478, CPIJ001757, CPIJ001758, CPIJ005956, CPIJ017014, CPIJ010546, CPIJ001759, CPIJ014220, CPIJ010544, CPIJ019673, CPIJ014221, CPIJ010541, CPIJ010231, CPIJ010175, CPIJ016855, CPIJ011127, CPIJ014219, CPIJ019704, CPIJ015428, CPIJ003082, CPIJ003361, CPIJ020199, CPIJ004411, CPIJ010538, CPIJ019702, CPIJ016852, CPIJ016853                                                                                                                                                                                                                                     | 416      | 204      | 14161     | 4,672           | 3,00E-08    | 3,01E-08  | 2,90E-08 |
|                  |                                                                    |       |      |          |                                                                                                                                                                                                                                                                                                                                                                                                                                                                                                                                                                                                                                                                        |          |          |           |                 |             |           |          |
|                  |                                                                    |       |      |          |                                                                                                                                                                                                                                                                                                                                                                                                                                                                                                                                                                                                                                                                        |          |          |           |                 |             |           |          |
| GOTERM_MF_DIRECT | GO:0016705--oxidoreductase activity, acting on paired donors, with | 28    | 5,82 | 6,44E-10 | CPIJ004411, CPIJ010538, CPIJ019702, CPIJ016852, CPIJ016853, CPIJ016846, CPIJ020229, CPIJ016848, CPIJ012907, CPIJ009478, CPIJ001757, CPIJ001758, CPIJ005956, CPIJ017014, CPIJ010546, CPIJ001759, CPIJ014220, CPIJ010544, CPIJ019673, CPIJ014221, CPIJ010541, CPIJ010231, CPIJ010175, CPIJ016855, CPIJ011127, CPIJ014219, CPIJ019704, CPIJ015428, CPIJ003082, CPIJ003361, CPIJ020199, CPIJ004411, CPIJ010538, CPIJ019702, CPIJ016852, CPIJ016853                                                                                                                                                                                                                         | 306      | 209      | 9432      | 4,129           | 1,12E-07    | 5,22E-08  | 5,10E-08 |
|                  |                                                                    |       |      |          |                                                                                                                                                                                                                                                                                                                                                                                                                                                                                                                                                                                                                                                                        |          |          |           |                 |             |           |          |
|                  |                                                                    |       |      |          |                                                                                                                                                                                                                                                                                                                                                                                                                                                                                                                                                                                                                                                                        |          |          |           |                 |             |           |          |
| GOTERM_MF_DIRECT | GO:0004497--monooxygenase activity                                 | 29    | 6,03 | 9,00E-10 | CPIJ016853, CPIJ001758, CPIJ005956, CPIJ017014, CPIJ010546, CPIJ014220, CPIJ010544, CPIJ019673, CPIJ014221, CPIJ010541, CPIJ010231, CPIJ010175, CPIJ016855, CPIJ011127, CPIJ019704, CPIJ015428, CPIJ003082, CPIJ003361, CPIJ020199, CPIJ004411, CPIJ010538, CPIJ019702, CPIJ016852, CPIJ016853                                                                                                                                                                                                                                                                                                                                                                         | 306      | 227      | 9432      | 3,938           | 1,57E-07    | 5,22E-08  | 5,10E-08 |
|                  |                                                                    |       |      |          |                                                                                                                                                                                                                                                                                                                                                                                                                                                                                                                                                                                                                                                                        |          |          |           |                 |             |           |          |
|                  |                                                                    |       |      |          |                                                                                                                                                                                                                                                                                                                                                                                                                                                                                                                                                                                                                                                                        |          |          |           |                 |             |           |          |
| INTERPRO         | IPR017972:Cytochrome P450, conserved site                          | 25    | 5,20 | 2,35E-10 | CPIJ016852, CPIJ016853, CPIJ016846, CPIJ020229, CPIJ016848, CPIJ012907, CPIJ009478, CPIJ001757, CPIJ001758, CPIJ005956, CPIJ017014, CPIJ010546, CPIJ001759, CPIJ014220, CPIJ010544, CPIJ019673, CPIJ014221, CPIJ010541, CPIJ010231, CPIJ010175, CPIJ016855, CPIJ011127, CPIJ014219, CPIJ019704, CPIJ015428, CPIJ003082, CPIJ003361, CPIJ020199, CPIJ004411, CPIJ010538, CPIJ019702, CPIJ016852, CPIJ016853                                                                                                                                                                                                                                                             | 416      | 173      | 14161     | 4,919           | 1,35E-07    | 6,75E-08  | 6,52E-08 |
|                  |                                                                    |       |      |          |                                                                                                                                                                                                                                                                                                                                                                                                                                                                                                                                                                                                                                                                        |          |          |           |                 |             |           |          |
|                  |                                                                    |       |      |          |                                                                                                                                                                                                                                                                                                                                                                                                                                                                                                                                                                                                                                                                        |          |          |           |                 |             |           |          |
| GOTERM_MF_DIRECT | GO:0020037--heme binding                                           | 28    | 5,82 | 1,80E-08 | CPIJ019704, CPIJ015428, CPIJ003082, CPIJ003361, CPIJ020199, CPIJ004223, CPIJ004228, CPIJ005898, CPIJ014181, CPIJ002604, CPIJ012180, CPIJ001777, CPIJ016342, CPIJ018326, CPIJ017511, CPIJ018627, CPIJ002678, CPIJ002675, CPIJ018626, CPIJ002676, CPIJ020053, CPIJ002679, CPIJ014052, CPIJ018624, CPIJ000031                                                                                                                                                                                                                                                                                                                                                             | 306      | 243      | 9432      | 3,552           | 3,13E-06    | 7,84E-07  | 7,66E-07 |
|                  |                                                                    |       |      |          |                                                                                                                                                                                                                                                                                                                                                                                                                                                                                                                                                                                                                                                                        |          |          |           |                 |             |           |          |
|                  |                                                                    |       |      |          |                                                                                                                                                                                                                                                                                                                                                                                                                                                                                                                                                                                                                                                                        |          |          |           |                 |             |           |          |
| GOTERM_CC_DIRECT | GO:0005576--extracellular region                                   | 32    | 6,65 | 4,48E-08 | CPIJ012180, CPIJ001777, CPIJ016342, CPIJ018326, CPIJ017511, CPIJ018627, CPIJ002678, CPIJ002675, CPIJ018626, CPIJ002676, CPIJ020053, CPIJ002679, CPIJ014052, CPIJ018624, CPIJ000031                                                                                                                                                                                                                                                                                                                                                                                                                                                                                     | 206      | 392      | 7637      | 3,026           | 2,37E-06    | 2,37E-06  | 2,33E-06 |
|                  |                                                                    |       |      |          |                                                                                                                                                                                                                                                                                                                                                                                                                                                                                                                                                                                                                                                                        |          |          |           |                 |             |           |          |
|                  |                                                                    |       |      |          |                                                                                                                                                                                                                                                                                                                                                                                                                                                                                                                                                                                                                                                                        |          |          |           |                 |             |           |          |
| GOTERM_BP_DIRECT | GO:0006749--glutathione metabolic process                          | 10    | 2,08 | 5,15E-07 | CPIJ020053, CPIJ002679, CPIJ014052, CPIJ018624, CPIJ000031, CPIJ010231, CPIJ016846, CPIJ010175, CPIJ011127, CPIJ003082, CPIJ015428, CPIJ020229, CPIJ016848, CPIJ003361, CPIJ004411, CPIJ009478, CPIJ001757, CPIJ001758, CPIJ010538, CPIJ005956, CPIJ010546, CPIJ014220, CPIJ010544, CPIJ019702, CPIJ014221, CPIJ010541                                                                                                                                                                                                                                                                                                                                                 | 135      | 40       | 5220      | 9,667           | 5,98E-05    | 5,92E-05  | 5,92E-05 |
|                  |                                                                    |       |      |          |                                                                                                                                                                                                                                                                                                                                                                                                                                                                                                                                                                                                                                                                        |          |          |           |                 |             |           |          |
|                  |                                                                    |       |      |          |                                                                                                                                                                                                                                                                                                                                                                                                                                                                                                                                                                                                                                                                        |          |          |           |                 |             |           |          |
| INTERPRO         | IPR002401:Cytochrome P450, E-class, group I                        | 20    | 4,16 | 3,69E-07 | CPIJ010541, CPIJ018627, CPIJ002678, CPIJ002675, CPIJ018626, CPIJ002676, CPIJ020053, CPIJ002679, CPIJ014052, CPIJ018624, CPIJ000031                                                                                                                                                                                                                                                                                                                                                                                                                                                                                                                                     | 416      | 165      | 14161     | 4,126           | 2,12E-04    | 7,07E-05  | 6,82E-05 |
|                  |                                                                    |       |      |          |                                                                                                                                                                                                                                                                                                                                                                                                                                                                                                                                                                                                                                                                        |          |          |           |                 |             |           |          |
|                  |                                                                    |       |      |          |                                                                                                                                                                                                                                                                                                                                                                                                                                                                                                                                                                                                                                                                        |          |          |           |                 |             |           |          |
| INTERPRO         | IPR004045:Glutathione S-transferase, N-terminal                    | 10    | 2,08 | 1,42E-06 | CPIJ020053, CPIJ002679, CPIJ014052, CPIJ018624, CPIJ000031, CPIJ018627, CPIJ002678, CPIJ002675, CPIJ018626, CPIJ002676, CPIJ020053, CPIJ002679, CPIJ014052, CPIJ018624, CPIJ000031                                                                                                                                                                                                                                                                                                                                                                                                                                                                                     | 416      | 39       | 14161     | 8,728           | 8,15E-04    | 2,04E-04  | 1,97E-04 |
|                  |                                                                    |       |      |          |                                                                                                                                                                                                                                                                                                                                                                                                                                                                                                                                                                                                                                                                        |          |          |           |                 |             |           |          |
|                  |                                                                    |       |      |          |                                                                                                                                                                                                                                                                                                                                                                                                                                                                                                                                                                                                                                                                        |          |          |           |                 |             |           |          |
| INTERPRO         | IPR010987:Glutathione S-transferase, C-terminal-like               | 10    | 2,08 | 2,23E-06 | CPIJ020053, CPIJ002679, CPIJ014052, CPIJ018624, CPIJ000031, CPIJ018627, CPIJ002678, CPIJ002675, CPIJ018626, CPIJ002676, CPIJ020053, CPIJ002679, CPIJ014052, CPIJ018624                                                                                                                                                                                                                                                                                                                                                                                                                                                                                                 | 416      | 41       | 14161     | 8,303           | 0,001278134 | 2,56E-04  | 2,47E-04 |
|                  |                                                                    |       |      |          |                                                                                                                                                                                                                                                                                                                                                                                                                                                                                                                                                                                                                                                                        |          |          |           |                 |             |           |          |
|                  |                                                                    |       |      |          |                                                                                                                                                                                                                                                                                                                                                                                                                                                                                                                                                                                                                                                                        |          |          |           |                 |             |           |          |
| INTERPRO         | IPR004046:Glutathione S-transferase, C-terminal                    | 9     | 1,87 | 4,73E-06 | CPIJ020053, CPIJ002679, CPIJ014052, CPIJ018624, CPIJ000348, CPIJ001747, CPIJ006930, CPIJ006792, CPIJ015785, CPIJ016697, CPIJ012013, CPIJ016301, CPIJ014219, CPIJ019704, CPIJ001759, CPIJ016852, CPIJ020199, CPIJ016853                                                                                                                                                                                                                                                                                                                                                                                                                                                 | 416      | 34       | 14161     | 9,011           | 0,002710165 | 4,53E-04  | 4,37E-04 |
|                  |                                                                    |       |      |          |                                                                                                                                                                                                                                                                                                                                                                                                                                                                                                                                                                                                                                                                        |          |          |           |                 |             |           |          |
|                  |                                                                    |       |      |          |                                                                                                                                                                                                                                                                                                                                                                                                                                                                                                                                                                                                                                                                        |          |          |           |                 |             |           |          |
| GOTERM_CC_DIRECT | GO:0005615--extracellular space                                    | 11    | 2,29 | 4,00E-05 | CPIJ016697, CPIJ012013, CPIJ016301, CPIJ014219, CPIJ019704, CPIJ001759, CPIJ016852, CPIJ020199, CPIJ016853                                                                                                                                                                                                                                                                                                                                                                                                                                                                                                                                                             | 206      | 78       | 7637      | 5,228           | 0,002115452 | 0,0010588 | 0,001039 |
|                  |                                                                    |       |      |          |                                                                                                                                                                                                                                                                                                                                                                                                                                                                                                                                                                                                                                                                        |          |          |           |                 |             |           |          |
|                  |                                                                    |       |      |          |                                                                                                                                                                                                                                                                                                                                                                                                                                                                                                                                                                                                                                                                        |          |          |           |                 |             |           |          |
| INTERPRO         | IPR002402:Cytochrome P450, E-class, group II                       | 6     | 1,25 | 4,97E-05 | CPIJ016853, CPIJ010541, CPIJ018627, CPIJ002678, CPIJ002675, CPIJ018626, CPIJ002676, CPIJ020053, CPIJ002679, CPIJ014052, CPIJ018624, CPIJ000348, CPIJ001747, CPIJ006930, CPIJ006792, CPIJ015785, CPIJ016697, CPIJ012013, CPIJ016301, CPIJ014219, CPIJ019704, CPIJ001759, CPIJ016852, CPIJ020199, CPIJ016853                                                                                                                                                                                                                                                                                                                                                             | 416      | 15       | 14161     | 13,616          | 0,028124428 | 0,0040824 | 0,00394  |
|                  |                                                                    |       |      |          |                                                                                                                                                                                                                                                                                                                                                                                                                                                                                                                                                                                                                                                                        |          |          |           |                 |             |           |          |
|                  |                                                                    |       |      |          |                                                                                                                                                                                                                                                                                                                                                                                                                                                                                                                                                                                                                                                                        |          |          |           |                 |             |           |          |
| GOTERM_MF_DIRECT | GO:0008061--chitin binding                                         | 16    | 3,33 | 1,43E-04 | CPIJ019120, CPIJ014193, CPIJ016342, CPIJ017511, CPIJ016344, CPIJ004730, CPIJ019363, CPIJ005898, CPIJ002604, CPIJ014181, CPIJ019120, CPIJ014193, CPIJ016342, CPIJ017511, CPIJ016344                                                                                                                                                                                                                                                                                                                                                                                                                                                                                     | 306      | 155      | 9432      | 3,182           | 0,02465092  | 0,0049916 | 0,004877 |
|                  |                                                                    |       |      |          |                                                                                                                                                                                                                                                                                                                                                                                                                                                                                                                                                                                                                                                                        |          |          |           |                 |             |           |          |
|                  |                                                                    |       |      |          |                                                                                                                                                                                                                                                                                                                                                                                                                                                                                                                                                                                                                                                                        |          |          |           |                 |             |           |          |

|                  |                                                                   |    |      |          |                                                                                                                                                                                                                                                                                                            |     |     |       |        |             |           |          |
|------------------|-------------------------------------------------------------------|----|------|----------|------------------------------------------------------------------------------------------------------------------------------------------------------------------------------------------------------------------------------------------------------------------------------------------------------------|-----|-----|-------|--------|-------------|-----------|----------|
| INTERPRO         | IPR002557:Chitin binding domain                                   | 14 | 2,91 | 1,55E-04 | CPIJ015734, CPIJ011623, CPIJ008557, CPIJ008558, CPIJ004731, CPIJ00                                                                                                                                                                                                                                         | 416 | 134 | 14161 | 3,557  | 0,085138716 | 0,0111414 | 0,010754 |
| GOTERM_MF_DIRECT | GO:0004556-alpha-amylase activity                                 | 5  | 1,04 | 4,32E-04 | CPIJ005064, CPIJ005060, CPIJ005725, CPIJ008079, CPIJ001464                                                                                                                                                                                                                                                 | 306 | 12  | 9432  | 12,843 | 0,07243363  | 0,0125291 | 0,012241 |
| GOTERM_CC_DIRECT | GO:0043231-intracellular membrane-bounded organelle               | 5  | 1,04 | 7,12E-04 | CPIJ019704, CPIJ014889, CPIJ016852, CPIJ016853                                                                                                                                                                                                                                                             | 206 | 16  | 7637  | 11,585 | 0,037046414 | 0,0125789 | 0,012342 |
| INTERPRO         | IPR006046:Alpha amylase                                           | 5  | 1,04 | 2,98E-04 | CPIJ005064, CPIJ005060, CPIJ005725, CPIJ008079, CPIJ001464                                                                                                                                                                                                                                                 | 416 | 12  | 14161 | 14,184 | 0,157483272 | 0,0171635 | 0,016566 |
| INTERPRO         | IPR006048:Alpha-amylase, C-terminal all beta                      | 5  | 1,04 | 2,98E-04 | CPIJ005064, CPIJ005060, CPIJ005725, CPIJ008079, CPIJ001464                                                                                                                                                                                                                                                 | 416 | 12  | 14161 | 14,184 | 0,157483272 | 0,0171635 | 0,016566 |
| INTERPRO         | IPR008930:Terpenoid cyclases/protein prenyltransferase a-a toroid | 5  | 1,04 | 7,68E-04 | CPIJ000348, CPIJ001747, CPIJ016574                                                                                                                                                                                                                                                                         | 416 | 15  | 14161 | 11,347 | 0,356446496 | 0,0401226 | 0,038727 |
| INTERPRO         | IPR019742:Alpha-2-macroglobulin, conserved site                   | 4  | 0,83 | 0,001254 | CPIJ000348, CPIJ001747<br>CPIJ019363, CPIJ005064, CPIJ002604, CPIJ019120, CPIJ008904,<br>CPIJ005060, CPIJ005725, CPIJ013173, CPIJ008079, CPIJ001464,<br>CPIJ017511                                                                                                                                         | 416 | 8   | 14161 | 17,020 | 0,513304658 | 0,0569847 | 0,055003 |
| INTERPRO         | IPR017853:Glycoside hydrolase, superfamily                        | 11 | 2,29 | 0,001448 | CPIJ012697, CPIJ012699, CPIJ017118, CPIJ012700, CPIJ010308,<br>CPIJ010307, CPIJ010310                                                                                                                                                                                                                      | 416 | 110 | 14161 | 3,404  | 0,564627237 | 0,0569847 | 0,055003 |
| INTERPRO         | IPR015897:CHK kinase-like                                         | 8  | 1,66 | 0,001462 | CPIJ012702, CPIJ010307, CPIJ010310<br>CPIJ005064, CPIJ008904, CPIJ005060, CPIJ005725, CPIJ013173,                                                                                                                                                                                                          | 416 | 58  | 14161 | 4,695  | 0,568228758 | 0,0569847 | 0,055003 |
| INTERPRO         | IPR013780:Glycosyl hydrolase, family 13, all-beta                 | 7  | 1,46 | 0,001487 | CPIJ008079, CPIJ001464                                                                                                                                                                                                                                                                                     | 416 | 43  | 14161 | 5,542  | 0,574256476 | 0,0569847 | 0,055003 |
| INTERPRO         | IPR002890:Alpha-2-macroglobulin, N-terminal                       | 4  | 0,83 | 0,00184  | CPIJ000348, CPIJ001747<br>CPIJ012697, CPIJ012699, CPIJ017118, CPIJ012700, CPIJ010308,                                                                                                                                                                                                                      | 416 | 9   | 14161 | 15,129 | 0,652531455 | 0,0661218 | 0,063822 |
| INTERPRO         | IPR004119:Protein of unknown function DUF227                      | 8  | 1,66 | 0,002374 | CPIJ012702, CPIJ010307, CPIJ010310                                                                                                                                                                                                                                                                         | 416 | 63  | 14161 | 4,323  | 0,744492273 | 0,077824  | 0,075117 |
| INTERPRO         | IPR009048:Alpha-macroglobulin, receptor-binding                   | 4  | 0,83 | 0,002572 | CPIJ000348, CPIJ001747                                                                                                                                                                                                                                                                                     | 416 | 10  | 14161 | 13,616 | 0,771903367 | 0,077824  | 0,075117 |
| INTERPRO         | IPR001599:Alpha-2-macroglobulin                                   | 4  | 0,83 | 0,002572 | CPIJ000348, CPIJ001747<br>CPIJ002223, CPIJ002604, CPIJ000348, CPIJ005725, CPIJ013173,                                                                                                                                                                                                                      | 416 | 10  | 14161 | 13,616 | 0,771903367 | 0,077824  | 0,075117 |
| INTERPRO         | IPR002213:UDP-glucuronosyl/UDP-glucosyltransferase                | 6  | 1,25 | 0,002913 | CPIJ020264                                                                                                                                                                                                                                                                                                 | 416 | 34  | 14161 | 6,007  | 0,812553686 | 0,0801805 | 0,077392 |
| INTERPRO         | IPR003172:MD-2-related lipid-recognition (ML) domain              | 5  | 1,04 | 0,002928 | CPIJ002743, CPIJ002744, CPIJ012180, CPIJ002740, CPIJ018326<br>CPIJ005064, CPIJ005060, CPIJ005725, CPIJ013173, CPIJ008079,                                                                                                                                                                                  | 416 | 21  | 14161 | 8,105  | 0,814245091 | 0,0801805 | 0,077392 |
| INTERPRO         | IPR006047:Glycosyl hydrolase, family 13, catalytic domain         | 6  | 1,25 | 0,003318 | CPIJ001464                                                                                                                                                                                                                                                                                                 | 416 | 35  | 14161 | 5,836  | 0,851549901 | 0,0828846 | 0,080002 |
| INTERPRO         | IPR011626:A-macroglobulin complement component                    | 4  | 0,83 | 0,00346  | CPIJ000348, CPIJ001747                                                                                                                                                                                                                                                                                     | 416 | 11  | 14161 | 12,378 | 0,863197054 | 0,0828846 | 0,080002 |
| INTERPRO         | IPR011625:Alpha-2-macroglobulin, N-terminal 2                     | 4  | 0,83 | 0,00346  | CPIJ000348, CPIJ001747                                                                                                                                                                                                                                                                                     | 416 | 11  | 14161 | 12,378 | 0,863197054 | 0,0828846 | 0,080002 |
| INTERPRO         | IPR005829:Sugar transporter, conserved site                       | 6  | 1,25 | 0,003762 | CPIJ012675, CPIJ001812, CPIJ017472, CPIJ000191, CPIJ017473                                                                                                                                                                                                                                                 | 416 | 36  | 14161 | 5,673  | 0,885056161 | 0,0865201 | 0,083511 |
| GOTERM_MF_DIRECT | GO:0004866-endopeptidase inhibitor activity                       | 4  | 0,83 | 0,004554 | CPIJ000348, CPIJ001747<br>CPIJ006075, CPIJ007385, CPIJ015106, CPIJ017789, CPIJ007384,<br>CPIJ019428, CPIJ017738, CPIJ011616, CPIJ009625, CPIJ002156,<br>CPIJ002138, CPIJ002139, CPIJ002659, CPIJ017793, CPIJ001979,                                                                                        | 306 | 11  | 9432  | 11,209 | 0,548082208 | 0,1132064 | 0,110604 |
| INTERPRO         | IPR001314:Peptidase S1A, chymotrypsin-type                        | 19 | 3,95 | 0,007404 | CPIJ017792, CPIJ011382, CPIJ016224, CPIJ011298<br>CPIJ000173, CPIJ000174, CPIJ000175, CPIJ000176, CPIJ000177,<br>CPIJ019428, CPIJ017738, CPIJ008523, CPIJ011616, CPIJ009625,<br>CPIJ002156, CPIJ002138, CPIJ002139, CPIJ002659, CPIJ006967,<br>CPIJ017793, CPIJ001979, CPIJ011381, CPIJ017792, CPIJ011382, | 416 | 324 | 14161 | 1,996  | 0,985954226 | 0,1637318 | 0,158037 |
| INTERPRO         | IPR001254:Peptidase S1                                            | 22 | 4,57 | 0,00788  | CPIJ016224, CPIJ011298<br>CPIJ004228, CPIJ011478, CPIJ004230, CPIJ004225, CPIJ004224,                                                                                                                                                                                                                      | 416 | 402 | 14161 | 1,863  | 0,989334854 | 0,1678052 | 0,161969 |
| INTERPRO         | IPR013818:Lipase, N-terminal                                      | 7  | 1,46 | 0,009419 | CPIJ004223<br>CPIJ006075, CPIJ007385, CPIJ015106, CPIJ017789, CPIJ007384,<br>CPIJ019428, CPIJ017738, CPIJ008523, CPIJ011616, CPIJ009625,<br>CPIJ002156, CPIJ002138, CPIJ002139, CPIJ002659, CPIJ006967,<br>CPIJ017793, CPIJ001979, CPIJ011381, CPIJ017792, CPIJ011382,                                     | 416 | 62  | 14161 | 3,843  | 0,995625479 | 0,1934198 | 0,186692 |
| INTERPRO         | IPR009003:Trypsin-like cysteine/serine peptidase domain           | 22 | 4,57 | 0,009757 | CPIJ016224, CPIJ011298<br>CPIJ004228, CPIJ011478, CPIJ004230, CPIJ004225, CPIJ004224,                                                                                                                                                                                                                      | 416 | 411 | 14161 | 1,822  | 0,996403693 | 0,1934519 | 0,186723 |
| INTERPRO         | IPR000734:Lipase                                                  | 7  | 1,46 | 0,01016  | CPIJ004223<br>CPIJ004228, CPIJ002103, CPIJ011478, CPIJ004230, CPIJ004225,                                                                                                                                                                                                                                  | 416 | 63  | 14161 | 3,782  | 0,997153864 | 0,1947375 | 0,187964 |
| GOTERM_BP_DIRECT | GO:0006629-lipid metabolic process                                | 8  | 1,66 | 0,00364  | CPIJ004224, CPIJ004223                                                                                                                                                                                                                                                                                     | 135 | 78  | 5220  | 3,966  | 0,3449553   | 0,2093205 | 0,20932  |
| INTERPRO         | IPR004911:Gamma interferon inducible lysosomal thiol reductase    | 3  | 0,62 | 0,011885 | CPIJ008702, CPIJ007525, CPIJ007524                                                                                                                                                                                                                                                                         | 416 | 6   | 14161 | 17,020 | 0,998954    | 0,2201117 | 0,212456 |
| INTERPRO         | IPR001734:Sodium/solute symporter                                 | 4  | 0,83 | 0,012515 | CPIJ002534, CPIJ002361, CPIJ000151, CPIJ0001859<br>CPIJ012675, CPIJ001773, CPIJ001812, CPIJ017472, CPIJ000191,                                                                                                                                                                                             | 416 | 17  | 14161 | 8,010  | 0,999274797 | 0,2201117 | 0,212456 |
| INTERPRO         | IPR005828:General substrate transporter                           | 7  | 1,46 | 0,012632 | CPIJ017473                                                                                                                                                                                                                                                                                                 | 416 | 66  | 14161 | 3,610  | 0,999322595 | 0,2201117 | 0,212456 |
| INTERPRO         | IPR019826:Carboxylesterase type B, active site                    | 6  | 1,25 | 0,013968 | CPIJ007828, CPIJ018231, CPIJ018233, CPIJ013917, CPIJ013918<br>CPIJ012675, CPIJ001773, CPIJ001812, CPIJ017472, CPIJ000191,                                                                                                                                                                                  | 416 | 49  | 14161 | 4,168  | 0,999688583 | 0,2304508 | 0,222435 |
| INTERPRO         | IPR020846:Major facilitator superfamily domain                    | 9  | 1,87 | 0,014027 | CPIJ017473, CPIJ004817, CPIJ007652                                                                                                                                                                                                                                                                         | 416 | 108 | 14161 | 2,837  | 0,999699107 | 0,2304508 | 0,222435 |
| INTERPRO         | IPR011051:RmlC-like cupin domain                                  | 3  | 0,62 | 0,016318 | CPIJ000377, CPIJ010456, CPIJ020056<br>CPIJ006120, CPIJ012831, CPIJ007727, CPIJ013538, CPIJ012040,                                                                                                                                                                                                          | 416 | 7   | 14161 | 14,589 | 0,999920841 | 0,2606416 | 0,251576 |
| INTERPRO         | IPR002181:Fibrinogen, alpha/beta/gamma chain, C-terminal globu    | 8  | 1,66 | 0,017354 | CPIJ014772, CPIJ012829, CPIJ018159<br>CPIJ006120, CPIJ012831, CPIJ007727, CPIJ013538, CPIJ012040,                                                                                                                                                                                                          | 416 | 91  | 14161 | 2,993  | 0,999956745 | 0,2625869 | 0,253453 |
| INTERPRO         | IPR014716:Fibrinogen, alpha/beta/gamma chain, C-terminal globu    | 8  | 1,66 | 0,017354 | CPIJ014772, CPIJ012829, CPIJ018159                                                                                                                                                                                                                                                                         | 416 | 91  | 14161 | 2,993  | 0,999956745 | 0,2625869 | 0,253453 |

|                  |                                                                   |     |       |          |                                                                                                                                                                                                                                                         |                                                                                                                                                                                                                                                                                                                                                                                                                                                                                                                                                                                                                                                                                                                                                                                                                                                                                                                                                                                                                                                                                                                         |      |       |        |             |           |          |  |  |  |
|------------------|-------------------------------------------------------------------|-----|-------|----------|---------------------------------------------------------------------------------------------------------------------------------------------------------------------------------------------------------------------------------------------------------|-------------------------------------------------------------------------------------------------------------------------------------------------------------------------------------------------------------------------------------------------------------------------------------------------------------------------------------------------------------------------------------------------------------------------------------------------------------------------------------------------------------------------------------------------------------------------------------------------------------------------------------------------------------------------------------------------------------------------------------------------------------------------------------------------------------------------------------------------------------------------------------------------------------------------------------------------------------------------------------------------------------------------------------------------------------------------------------------------------------------------|------|-------|--------|-------------|-----------|----------|--|--|--|
|                  |                                                                   |     |       |          |                                                                                                                                                                                                                                                         | CPIJ010068, CPIJ017306, CPIJ011602, CPIJ005322, CPIJ000151, CPIJ000670, CPIJ003267, CPIJ003305, CPIJ002336, CPIJ018192, CPIJ000039, CPIJ005050, CPIJ014327, CPIJ011457, CPIJ005697, CPIJ009656, CPIJ005698, CPIJ005214, CPIJ009812, CPIJ005699, CPIJ005611, CPIJ005692, CPIJ006267, CPIJ004646, CPIJ001773, CPIJ004369, CPIJ001812, CPIJ010762, CPIJ016344, CPIJ010495, CPIJ012675, CPIJ011346, CPIJ014219, CPIJ004492, CPIJ003163, CPIJ004373, CPIJ006677, CPIJ005468, CPIJ008456, CPIJ002077, CPIJ010538, CPIJ008859, CPIJ019347, CPIJ010259, CPIJ004817, CPIJ017721, CPIJ007010, CPIJ002361, CPIJ004141, CPIJ007652, CPIJ000225, CPIJ008109, CPIJ019996, CPIJ010546, CPIJ010544, CPIJ012681, CPIJ014221, CPIJ010541, CPIJ008353, CPIJ000191, CPIJ002493, CPIJ012979, CPIJ000192, CPIJ009449, CPIJ020199, CPIJ006617, CPIJ002534, CPIJ016093, CPIJ002659, CPIJ017065, CPIJ016097, CPIJ016094, CPIJ019125, CPIJ012055, CPIJ018314, CPIJ005492, CPIJ011417, CPIJ006347, CPIJ009976, CPIJ006220, CPIJ000881, CPIJ009698, CPIJ001335, CPIJ017472, CPIJ017592, CPIJ001859, CPIJ017473, CPIJ012065, CPIJ012066, CPIJ010175, |      |       |        |             |           |          |  |  |  |
| GOTERM_CC_DIRECT | GO:0016021~integral component of membrane                         | 106 | 22,04 | 0,01999  | CPIJ011026, CPIJ012511, CPIJ003082, CPIJ003007, CPIJ001747,                                                                                                                                                                                             | 206                                                                                                                                                                                                                                                                                                                                                                                                                                                                                                                                                                                                                                                                                                                                                                                                                                                                                                                                                                                                                                                                                                                     | 3355 | 7637  | 1,171  | 0,657062529 | 0,2648686 | 0,259871 |  |  |  |
| GOTERM_MF_DIRECT | GO:0016671~oxidoreductase activity, acting on a sulfur group of d | 3   | 0,62  | 0,014343 | CPIJ008702, CPIJ007525, CPIJ007524                                                                                                                                                                                                                      | 306                                                                                                                                                                                                                                                                                                                                                                                                                                                                                                                                                                                                                                                                                                                                                                                                                                                                                                                                                                                                                                                                                                                     | 6    | 9432  | 15,412 | 0,919035595 | 0,2744354 | 0,268127 |  |  |  |
| GOTERM_MF_DIRECT | GO:0004180~carboxypeptidase activity                              | 5   | 1,04  | 0,015138 | CPIJ010495, CPIJ009106, CPIJ008878, CPIJ008877, CPIJ008873<br>CPIJ009428, CPIJ011478, CPIJ009429, CPIJ009423, CPIJ009424,                                                                                                                               | 306                                                                                                                                                                                                                                                                                                                                                                                                                                                                                                                                                                                                                                                                                                                                                                                                                                                                                                                                                                                                                                                                                                                     | 30   | 9432  | 5,137  | 0,929646513 | 0,2744354 | 0,268127 |  |  |  |
| GOTERM_MF_DIRECT | GO:0004806~triglyceride lipase activity                           | 7   | 1,46  | 0,015772 | CPIJ004223                                                                                                                                                                                                                                              | 306                                                                                                                                                                                                                                                                                                                                                                                                                                                                                                                                                                                                                                                                                                                                                                                                                                                                                                                                                                                                                                                                                                                     | 63   | 9432  | 3,425  | 0,9371011   | 0,2744354 | 0,268127 |  |  |  |
| GOTERM_MF_DIRECT | GO:0015020~glucuronosyltransferase activity                       | 4   | 0,83  | 0,019056 | CPIJ004369, CPIJ004373, CPIJ010762, CPIJ020264                                                                                                                                                                                                          | 306                                                                                                                                                                                                                                                                                                                                                                                                                                                                                                                                                                                                                                                                                                                                                                                                                                                                                                                                                                                                                                                                                                                     | 18   | 9432  | 6,850  | 0,964835679 | 0,3014295 | 0,2945   |  |  |  |
| GOTERM_BP_DIRECT | GO:0005975~carbohydrate metabolic process                         | 11  | 2,29  | 0,008366 | CPIJ005060, CPIJ005725, CPIJ013173, CPIJ008079, CPIJ001464,<br>CPIJ017511                                                                                                                                                                               | 135                                                                                                                                                                                                                                                                                                                                                                                                                                                                                                                                                                                                                                                                                                                                                                                                                                                                                                                                                                                                                                                                                                                     | 162  | 5220  | 2,626  | 0,622613181 | 0,3206791 | 0,320679 |  |  |  |
| INTERPRO         | IPR014710:RmlC-like jelly roll fold                               | 5   | 1,04  | 0,022395 | CPIJ000377, CPIJ010259, CPIJ010456, CPIJ020056                                                                                                                                                                                                          | 416                                                                                                                                                                                                                                                                                                                                                                                                                                                                                                                                                                                                                                                                                                                                                                                                                                                                                                                                                                                                                                                                                                                     | 37   | 14161 | 4,600  | 0,999997741 | 0,3228108 | 0,311583 |  |  |  |
| INTERPRO         | IPR003663:Sugar/inositol transporter                              | 4   | 0,83  | 0,022456 | CPIJ012675, CPIJ001812, CPIJ000191<br>CPIJ000840, CPIJ005656, CPIJ007736, CPIJ008859, CPIJ008447,                                                                                                                                                       | 416                                                                                                                                                                                                                                                                                                                                                                                                                                                                                                                                                                                                                                                                                                                                                                                                                                                                                                                                                                                                                                                                                                                     | 21   | 14161 | 6,844  | 0,999997822 | 0,3228108 | 0,311583 |  |  |  |
| GOTERM_MF_DIRECT | GO:0016491~oxidoreductase activity                                | 13  | 2,70  | 0,028011 | CPIJ005655, CPIJ013919                                                                                                                                                                                                                                  | 306                                                                                                                                                                                                                                                                                                                                                                                                                                                                                                                                                                                                                                                                                                                                                                                                                                                                                                                                                                                                                                                                                                                     | 199  | 9432  | 2,014  | 0,992870565 | 0,4061632 | 0,396826 |  |  |  |
| INTERPRO         | IPR008334:5'-Nucleotidase, C-terminal                             | 3   | 0,62  | 0,032996 | CPIJ018314, CPIJ018313                                                                                                                                                                                                                                  | 416                                                                                                                                                                                                                                                                                                                                                                                                                                                                                                                                                                                                                                                                                                                                                                                                                                                                                                                                                                                                                                                                                                                     | 10   | 14161 | 10,212 | 0,999999996 | 0,4627543 | 0,446659 |  |  |  |
| INTERPRO         | IPR020904:Short-chain dehydrogenase/reductase, conserved site     | 5   | 1,04  | 0,03389  | CPIJ016922, CPIJ011026, CPIJ002522, CPIJ007736, CPIJ005655<br>CPIJ019428, CPIJ017738, CPIJ008523, CPIJ011616, CPIJ009625,<br>CPIJ002156, CPIJ002138, CPIJ002139, CPIJ002659, CPIJ006967,<br>CPIJ017793, CPIJ001979, CPIJ011381, CPIJ017792, CPIJ011382, | 416                                                                                                                                                                                                                                                                                                                                                                                                                                                                                                                                                                                                                                                                                                                                                                                                                                                                                                                                                                                                                                                                                                                     | 42   | 14161 | 4,052  | 0,999999997 | 0,4639767 | 0,447838 |  |  |  |
| GOTERM_MF_DIRECT | GO:0004252~serine-type endopeptidase activity                     | 22  | 4,57  | 0,034865 | CPIJ016224, CPIJ011298                                                                                                                                                                                                                                  | 306                                                                                                                                                                                                                                                                                                                                                                                                                                                                                                                                                                                                                                                                                                                                                                                                                                                                                                                                                                                                                                                                                                                     | 425  | 9432  | 1,596  | 0,997918712 | 0,4666531 | 0,455925 |  |  |  |
| INTERPRO         | IPR011583:Chitinase II                                            | 4   | 0,83  | 0,035647 | CPIJ019363, CPIJ002604, CPIJ019120, CPIJ017511<br>CPIJ001828, CPIJ018231, CPIJ018235, CPIJ019717, CPIJ019718,                                                                                                                                           | 416                                                                                                                                                                                                                                                                                                                                                                                                                                                                                                                                                                                                                                                                                                                                                                                                                                                                                                                                                                                                                                                                                                                     | 25   | 14161 | 5,447  | 0,999999999 | 0,4766695 | 0,46009  |  |  |  |
| INTERPRO         | IPR002018:Carboxylesterase, type B                                | 7   | 1,46  | 0,036629 | CPIJ008422                                                                                                                                                                                                                                              | 416                                                                                                                                                                                                                                                                                                                                                                                                                                                                                                                                                                                                                                                                                                                                                                                                                                                                                                                                                                                                                                                                                                                     | 84   | 14161 | 2,837  | 1           | 0,4786737 | 0,462024 |  |  |  |
| INTERPRO         | IPR001223:Glycoside hydrolase, family 18, catalytic domain        | 4   | 0,83  | 0,039446 | CPIJ019363, CPIJ002604, CPIJ019120, CPIJ017511                                                                                                                                                                                                          | 416                                                                                                                                                                                                                                                                                                                                                                                                                                                                                                                                                                                                                                                                                                                                                                                                                                                                                                                                                                                                                                                                                                                     | 26   | 14161 | 5,237  | 1           | 0,4945018 | 0,477302 |  |  |  |
| INTERPRO         | IPR006179:5'-Nucleotidase/apyrase                                 | 3   | 0,62  | 0,03956  | CPIJ018314, CPIJ018313                                                                                                                                                                                                                                  | 416                                                                                                                                                                                                                                                                                                                                                                                                                                                                                                                                                                                                                                                                                                                                                                                                                                                                                                                                                                                                                                                                                                                     | 11   | 14161 | 9,284  | 1           | 0,4945018 | 0,477302 |  |  |  |
| GOTERM_MF_DIRECT | GO:0016740~transferase activity                                   | 9   | 1,87  | 0,045779 | CPIJ002676, CPIJ020053, CPIJ002679, CPIJ018624                                                                                                                                                                                                          | 306                                                                                                                                                                                                                                                                                                                                                                                                                                                                                                                                                                                                                                                                                                                                                                                                                                                                                                                                                                                                                                                                                                                     | 123  | 9432  | 2,255  | 0,999712319 | 0,5484221 | 0,535815 |  |  |  |
| GOTERM_MF_DIRECT | GO:0051119~sugar transmembrane transporter activity               | 3   | 0,62  | 0,047278 | CPIJ012675, CPIJ001812                                                                                                                                                                                                                                  | 306                                                                                                                                                                                                                                                                                                                                                                                                                                                                                                                                                                                                                                                                                                                                                                                                                                                                                                                                                                                                                                                                                                                     | 11   | 9432  | 8,406  | 0,999781155 | 0,5484221 | 0,535815 |  |  |  |
| GOTERM_CC_DIRECT | GO:005861~tropoin complex                                         | 2   | 0,42  | 0,052969 | CPIJ014296, CPIJ009743                                                                                                                                                                                                                                  | 206                                                                                                                                                                                                                                                                                                                                                                                                                                                                                                                                                                                                                                                                                                                                                                                                                                                                                                                                                                                                                                                                                                                     | 2    | 7637  | 37,073 | 0,9441137   | 0,5614701 | 0,550876 |  |  |  |
| INTERPRO         | IPR000175:Sodium:neurotransmitter symporter                       | 4   | 0,83  | 0,047632 | CPIJ012065, CPIJ003267, CPIJ012055, CPIJ012066                                                                                                                                                                                                          | 416                                                                                                                                                                                                                                                                                                                                                                                                                                                                                                                                                                                                                                                                                                                                                                                                                                                                                                                                                                                                                                                                                                                     | 28   | 14161 | 4,863  | 1           | 0,5827294 | 0,562461 |  |  |  |
| INTERPRO         | IPR019172:Osteopetrosis-associated transmembrane protein 1 prec   | 2   | 0,42  | 0,057755 | CPIJ016093, CPIJ016094                                                                                                                                                                                                                                  | 416                                                                                                                                                                                                                                                                                                                                                                                                                                                                                                                                                                                                                                                                                                                                                                                                                                                                                                                                                                                                                                                                                                                     | 2    | 14161 | 34,041 | 1           | 0,6511577 | 0,628509 |  |  |  |
| INTERPRO         | IPR003950:Potassium channel, voltage-dependent, ELK               | 2   | 0,42  | 0,057755 | CPIJ010259                                                                                                                                                                                                                                              | 416                                                                                                                                                                                                                                                                                                                                                                                                                                                                                                                                                                                                                                                                                                                                                                                                                                                                                                                                                                                                                                                                                                                     | 2    | 14161 | 34,041 | 1           | 0,6511577 | 0,628509 |  |  |  |
| INTERPRO         | IPR010300:Cysteine dioxygenase type I                             | 2   | 0,42  | 0,057755 | CPIJ010456, CPIJ020056                                                                                                                                                                                                                                  | 416                                                                                                                                                                                                                                                                                                                                                                                                                                                                                                                                                                                                                                                                                                                                                                                                                                                                                                                                                                                                                                                                                                                     | 2    | 14161 | 34,041 | 1           | 0,6511577 | 0,628509 |  |  |  |
| INTERPRO         | IPR001978:Tropoin                                                 | 2   | 0,42  | 0,057755 | CPIJ014296, CPIJ009743                                                                                                                                                                                                                                  | 416                                                                                                                                                                                                                                                                                                                                                                                                                                                                                                                                                                                                                                                                                                                                                                                                                                                                                                                                                                                                                                                                                                                     | 2    | 14161 | 34,041 | 1           | 0,6511577 | 0,628509 |  |  |  |
| GOTERM_MF_DIRECT | GO:0017172~cysteine dioxygenase activity                          | 2   | 0,42  | 0,063631 | CPIJ010456, CPIJ020056                                                                                                                                                                                                                                  | 306                                                                                                                                                                                                                                                                                                                                                                                                                                                                                                                                                                                                                                                                                                                                                                                                                                                                                                                                                                                                                                                                                                                     | 2    | 9432  | 30,824 | 0,999989241 | 0,6572212 | 0,642113 |  |  |  |
| GOTERM_MF_DIRECT | GO:0052689~carboxylic ester hydrolase activity                    | 5   | 1,04  | 0,06455  | CPIJ007828, CPIJ018233, CPIJ013917, CPIJ013918<br>CPIJ017592, CPIJ001128, CPIJ011190, CPIJ005468, CPIJ011185,                                                                                                                                           | 306                                                                                                                                                                                                                                                                                                                                                                                                                                                                                                                                                                                                                                                                                                                                                                                                                                                                                                                                                                                                                                                                                                                     | 47   | 9432  | 3,279  | 0,999990931 | 0,6572212 | 0,642113 |  |  |  |
| GOTERM_MF_DIRECT | GO:0016787~hydrolase activity                                     | 8   | 1,66  | 0,067988 | CPIJ011373, CPIJ018314                                                                                                                                                                                                                                  | 306                                                                                                                                                                                                                                                                                                                                                                                                                                                                                                                                                                                                                                                                                                                                                                                                                                                                                                                                                                                                                                                                                                                     | 111  | 9432  | 2,222  | 0,999995221 | 0,6572212 | 0,642113 |  |  |  |
| INTERPRO         | IPR008758:Peptidase S28                                           | 3   | 0,62  | 0,0618   | CPIJ008878, CPIJ008877, CPIJ008873                                                                                                                                                                                                                      | 416                                                                                                                                                                                                                                                                                                                                                                                                                                                                                                                                                                                                                                                                                                                                                                                                                                                                                                                                                                                                                                                                                                                     | 14   | 14161 | 7,294  | 1           | 0,6704739 | 0,647153 |  |  |  |
| INTERPRO         | IPR003010:Carbon-nitrogen hydrolase                               | 3   | 0,62  | 0,0618   | CPIJ007583, CPIJ017593, CPIJ017592                                                                                                                                                                                                                      | 416                                                                                                                                                                                                                                                                                                                                                                                                                                                                                                                                                                                                                                                                                                                                                                                                                                                                                                                                                                                                                                                                                                                     | 14   | 14161 | 7,294  | 1           | 0,6704739 | 0,647153 |  |  |  |
| GOTERM_CC_DIRECT | GO:0005777~peroxisome                                             | 4   | 0,83  | 0,07607  | CPIJ013919, CPIJ003059, CPIJ000670                                                                                                                                                                                                                      | 206                                                                                                                                                                                                                                                                                                                                                                                                                                                                                                                                                                                                                                                                                                                                                                                                                                                                                                                                                                                                                                                                                                                     | 37   | 7637  | 4,008  | 0,984904025 | 0,671955  | 0,659277 |  |  |  |
| GOTERM_MF_DIRECT | GO:0016811~hydrolase activity, acting on carbon-nitrogen (but noi | 2   | 0,42  | 0,093917 | CPIJ007583, CPIJ017593                                                                                                                                                                                                                                  | 306                                                                                                                                                                                                                                                                                                                                                                                                                                                                                                                                                                                                                                                                                                                                                                                                                                                                                                                                                                                                                                                                                                                     | 3    | 9432  | 20,549 | 0,999999965 | 0,7963488 | 0,778042 |  |  |  |
| GOTERM_MF_DIRECT | GO:0022857~transmembrane transporter activity                     | 10  | 2,08  | 0,094628 | CPIJ002534, CPIJ001773, CPIJ017472, CPIJ000191, CPIJ002361,<br>CPIJ000151, CPIJ001859, CPIJ017473, CPIJ004817, CPIJ007652                                                                                                                               | 306                                                                                                                                                                                                                                                                                                                                                                                                                                                                                                                                                                                                                                                                                                                                                                                                                                                                                                                                                                                                                                                                                                                     | 168  | 9432  | 1,835  | 0,999999969 | 0,7963488 | 0,778042 |  |  |  |
| GOTERM_MF_DIRECT | GO:0071949~FAD binding                                            | 4   | 0,83  | 0,096111 | CPIJ013919, CPIJ003059, CPIJ000670                                                                                                                                                                                                                      | 306                                                                                                                                                                                                                                                                                                                                                                                                                                                                                                                                                                                                                                                                                                                                                                                                                                                                                                                                                                                                                                                                                                                     | 34   | 9432  | 3,626  | 0,999999977 | 0,7963488 | 0,778042 |  |  |  |
| INTERPRO         | IPR006091:Acyl-CoA oxidase/dehydrogenase, central domain          | 3   | 0,62  | 0,078453 | CPIJ011633, CPIJ016453, CPIJ003059                                                                                                                                                                                                                      | 416                                                                                                                                                                                                                                                                                                                                                                                                                                                                                                                                                                                                                                                                                                                                                                                                                                                                                                                                                                                                                                                                                                                     | 16   | 14161 | 6,383  | 1           | 0,8201867 | 0,791165 |  |  |  |

|                  |                                                      |   |      |          |                                                             |     |     |       |        |             |           |          |
|------------------|------------------------------------------------------|---|------|----------|-------------------------------------------------------------|-----|-----|-------|--------|-------------|-----------|----------|
| INTERPRO         | IPR009100:Acyl-CoA dehydrogenase/oxidase             | 3 | 0,62 | 0,078453 | CPIJ011633, CPIJ016453, CPIJ003059                          | 416 | 16  | 14161 | 6,383  | 1           | 0,8201867 | 0,791658 |
| INTERPRO         | IPR012101:Biotinidase, eukaryotic                    | 2 | 0,42 | 0,085372 | CPIJ007583, CPIJ017593                                      | 416 | 3   | 14161 | 22,694 | 1           | 0,8612092 | 0,831254 |
| INTERPRO         | IPR008547:Protein of unknown function DUF829, TMEM53 | 2 | 0,42 | 0,085372 | CPIJ019996, CPIJ006220                                      | 416 | 3   | 14161 | 22,694 | 1           | 0,8612092 | 0,831254 |
|                  |                                                      |   |      |          | CPIJ010052, CPIJ008490, CPIJ006306, CPIJ009924, CPIJ013539, |     |     |       |        |             |           |          |
| INTERPRO         | IPR002110:Ankyrin repeat                             | 8 | 1,66 | 0,096202 | CPIJ017156, CPIJ018694, CPIJ018744                          | 416 | 133 | 14161 | 2,048  | 1           | 0,9229965 | 0,890892 |
| INTERPRO         | IPR001173:Glycosyl transferase, family 2             | 3 | 0,62 | 0,096313 | CPIJ005697, CPIJ005698, CPIJ005699                          | 416 | 18  | 14161 | 5,673  | 1           | 0,9229965 | 0,890892 |
| INTERPRO         | IPR001353:Proteasome, subunit alpha/beta             | 3 | 0,62 | 0,096313 | CPIJ000897, CPIJ017386, CPIJ007179                          | 416 | 18  | 14161 | 5,673  | 1           | 0,9229965 | 0,890892 |
| GOTERM_BP_DIRECT | GO:0009166~nucleotide catabolic process              | 3 | 0,62 | 0,03648  | CPIJ018314, CPIJ018313                                      | 135 | 12  | 5220  | 9,667  | 0,986577043 | 1         | 1        |
| GOTERM_BP_DIRECT | GO:0042412~taurine biosynthetic process              | 2 | 0,42 | 0,050687 | CPIJ010456, CPIJ020056                                      | 135 | 2   | 5220  | 38,667 | 0,997603908 | 1         | 1        |
| GOTERM_BP_DIRECT | GO:0006807~nitrogen compound metabolic process       | 3 | 0,62 | 0,084177 | CPIJ007583, CPIJ017593, CPIJ017592                          | 135 | 19  | 5220  | 6,105  | 0,999962833 | 1         | 1        |

**Table S6.** Dataset of the RT-qPCR assays for the RNAseq validation in pool of twenty fourth instar larvae of *Culex quinquefasciatus* from two Bin-resistant strains (REC, REC-2) compared to a susceptible strain (S). Samples in triplicates were used. Ct. Cycle threshold. Rq. Relative quantification. Log2FC. Log2 fold change.

| Gene/sample                                                 | Ct     | ΔCt    | Rq     | Log2FC     | Average      |
|-------------------------------------------------------------|--------|--------|--------|------------|--------------|
| CPIJ013173 Cqm1                                             |        |        |        |            |              |
| S1                                                          | 22.566 | 9.767  | 1      | 0          | <b>-0.63</b> |
| S2                                                          | 21.938 | 9.731  | 1.025  | 0.0356239  |              |
| S3                                                          | 22.796 | 10.438 | 0.628  | -0.6711635 |              |
| REC 1                                                       | 33.633 | 20.04  | 0.001  | -9.9657843 | <b>-9.63</b> |
| REC 2                                                       | 32.89  | 20.236 | 0.001  | -9.9657843 |              |
| REC 3                                                       | 31.05  | 18.514 | 0.002  | -8.9657843 |              |
| REC2 1                                                      | 28.484 | 15.849 | 0.015  | -6.0588937 | <b>-5.4</b>  |
| REC2 2                                                      | 27.428 | 14.801 | 0.031  | -5.011588  |              |
| REC2 3                                                      | 27.477 | 14.946 | 0.028  | -5.1584294 |              |
| CPIJ017593 Pantetheinase precursor                          |        |        |        |            |              |
| S1                                                          | 22.342 | 9.543  | 1      | 0          | -0.6         |
| S2                                                          | 22.202 | 9.996  | 0.731  | -0.4520567 |              |
| S3                                                          | 23.263 | 10.904 | 0.389  | -1.3621579 |              |
| REC 1                                                       | 25.819 | 12.226 | 0.156  | -2.6803821 | -2.74        |
| REC 2                                                       | 24.898 | 12.244 | 0.154  | -2.6989977 |              |
| REC 3                                                       | 24.938 | 12.402 | 0.138  | -2.8572598 |              |
| REC2 1                                                      | 27.312 | 14.676 | 0.028  | -5.1584294 | -4.09        |
| REC2 2                                                      | 26.287 | 13.66  | 0.058  | -4.1078033 |              |
| REC2 3                                                      | 25.088 | 12.557 | 0.124  | -3.011588  |              |
| CPIJ012066 Sodium/chloride dependent amino acid transporter |        |        |        |            |              |
| S1                                                          | 22.238 | 8.673  | 1      | 0          | -2.32        |
| S3                                                          | 20.493 | 8.194  | 1.394  | -4.6438562 |              |
| REC 1                                                       | 35.043 | 19.548 | 0.001  | -9.9657843 |              |
| REC 2                                                       | 33.98  | 19.418 | 0.001  | -9.9657843 | -9.96        |
| REC 3                                                       | 34.097 | 19.832 | 0.000  |            |              |
| REC2 1                                                      | 30.128 | 17.659 | 0.002  | -8.9657843 |              |
| REC2 2                                                      | 31.296 | 18.133 | 0.001  | -9.9657843 | -9.29        |
| REC2 3                                                      | 30.221 | 18.029 | 0.002  | -8.9657843 |              |
| CPIJ010801 Carboxypeptidase B precursor                     |        |        |        |            |              |
| S1                                                          | 25.643 | 13.298 | 1      | 0          | <b>-0.04</b> |
| S2                                                          | 26.091 | 13.528 | 0.853  | -0.2293824 |              |
| S3                                                          | 25.636 | 13.214 | 1.06   | 0.0840643  |              |
| REC 1                                                       | 21.884 | 9.11   | 18.226 | 4.1879261  | <b>5.16</b>  |
| REC 2                                                       | 20.676 | 7.604  | 51.758 | 5.69371    |              |
| REC 3                                                       | 20.288 | 7.691  | 48.729 | 5.6067087  |              |
| REC2 1                                                      | 21.989 | 9.358  | 15.353 | 3.9404487  | <b>3.97</b>  |
| REC2 2                                                      | 22.038 | 9.279  | 16.214 | 4.0191681  |              |
| REC2 3                                                      | 21.915 | 9.343  | 15.512 | 3.9553128  |              |
| CPIJ002522 Farnesol dehydrogenase                           |        |        |        |            |              |
| S1                                                          | 30.979 | 18.634 | 1      | 0          | <b>-0.04</b> |

|        |        |        |         |           |             |
|--------|--------|--------|---------|-----------|-------------|
| S2     | 30.344 | 17.781 | 1.806   | 0.8527979 |             |
| S3     | 30.391 | 17.97  | 1.585   | 0.6644828 |             |
| REC 2  | 23.688 | 10.617 | 259.056 | 8.0171202 | <b>7.99</b> |
| REC 3  | 23.26  | 10.664 | 250.773 | 7.9702382 |             |
| REC2 2 | 25.303 | 12.544 | 68.135  | 6.0903242 | <b>5.55</b> |
| REC2 3 | 26.193 | 13.62  | 32.305  | 5.0136856 |             |

---



**Table S7.** Statistics of the RT-qPCR assays for the relative quantification of the transcripts of *Culex quinquefasciatus* fourth instar larvae from two Bin-resistant strains (REC, REC-2) compared to a susceptible one (S). Transcripts are from five differentially expressed genes (DEGs) revealed by RNAseq and transcripts assessed in individual larvae.

| Gene                             | Analysis    | <i>P</i> <sup>1</sup> | t-test        |
|----------------------------------|-------------|-----------------------|---------------|
| <b>DEGs<sup>2</sup> (RNAseq)</b> |             |                       |               |
| Cqm1                             | S x REC     | < 0.0001              | t(4)= 23.27   |
|                                  | S x REC-2   | 0.0002                | t(4)= 12.99   |
|                                  | REC x REC-2 | 0,0008                | t(4)= 9.038   |
| Pan                              | S x REC     | 0.0061                | t(4)= 5.293   |
|                                  | S x REC-2   | 0.0091                | t(4)= 4.726   |
|                                  | REC x REC-2 | 0,0964                | t(4)= 2.165   |
| NaCl                             | S x REC     | 0.0006                | t(2)= 42.59   |
|                                  | S x REC-2   | 0.0003                | t(3)= 20.47   |
|                                  | REC x REC-2 | 0.2191                | t(3)= 1.549   |
| CbB                              | S x REC     | 0.0005                | t(4)= 10.49   |
|                                  | S x REC-2   | < 0.0001              | t(4)= 41.56   |
|                                  | REC x REC-2 | 0,0714                | t(4)= 2.438   |
| Far                              | S x REC     | 0.0002                | t(3)= 22.39   |
|                                  | S x REC-2   | 0.0024                | t(3)= 9.667   |
|                                  | REC x REC-2 | 0.0454                | t(2)= 4.531   |
| <b>Pant (individual larvae)</b>  |             |                       |               |
| Pan                              | S x REC     | < 0.0001              | t(8)= 69.35   |
|                                  | S x REC-2   | < 0.0001              | t(7.2)= 73.40 |
|                                  | REC x REC-2 | 0.06                  | t(1.9)= 65.68 |

<sup>1</sup>  $p \leq 0.05$  is significantly different, for t-test. <sup>2</sup> Cqm1-*Culex quinquefasciatus* maltase 1 (CPIJ013173); Pan-pantetheinase (CPIJ017593); NaCl-Sodium/chloride dependent amino acid transporter putative (CPIJ012066); CbB-Carboxypeptidase B precursor (CPIJ010801); Far-Farnesol dehydrogenase (CPIJ002522).

**Table S8.** Genes of *Culex quinquefasciatus* pantetheinases found in Vectorbase ([www.vectorbase.org](http://www.vectorbase.org) accessed on 20 September 2023), their location and identity towards CPIJ017593.

| Identity   | Description                       | Genomic sequence | Location Start-End (strand) | Genomic sequence | Transcript lenght (bp) | AA <sup>1</sup> (No.) | ID <sup>2</sup> (%) | LFC <sup>3</sup> RNA-seq |       |
|------------|-----------------------------------|------------------|-----------------------------|------------------|------------------------|-----------------------|---------------------|--------------------------|-------|
|            |                                   |                  |                             |                  |                        |                       |                     | REC                      | REC-2 |
| CPIJ017593 | Pantetheinase precursor           | DS232811         | 111820-114238 (+)           | DS232811         | 1551                   | 516                   | Reference           | -8.8                     | -8.2  |
| CPIJ007582 | Vanin-like protein 1 <sup>4</sup> | DS231994         | 288993-290747 (+)           | DS231994         | 1581                   | 526                   | 96                  | ND <sup>5</sup>          | -0.67 |
| CPIJ007581 | Vanin-like protein 1              | DS232811         | 99896-108188 (-)            | DS232811         | 1566                   | 521                   | 64                  | 1.12                     | ND    |
| CPIJ017592 | Vanin-like protein 1              | DS231994         | 275664-280417 (-)           | DS231994         | 1668                   | 555                   | 62                  | -7.9                     | -8.3  |
| CPIJ007583 | Pantetheinase precursor           | DS231994         | 322817-324748 (+)           | DS231994         | 1563                   | 520                   | 55                  | ND                       | -1.96 |
| CPIJ007584 | Uncharacterized protein           | DS231994         | 356529-358371 (+)           | DS231994         | 1485                   | 494                   | 31                  | -0.51                    | -0.08 |

<sup>1</sup> Amino acids; <sup>2</sup> Identity considering the global alignment; <sup>3</sup> Log2 fold change; <sup>4</sup> Vanin-like protein 1 precursor putative. <sup>5</sup> Non detected.

**Table S9.** Dataset of the RT-qPCR assays for the relative quantification of the pantheteinase transcripts (CPIJ017593) in individual *Culex quinquefasciatus* fourth instar larvae from two Bin-resistant strains (REC, REC-2) compared to a susceptible strain (S). Ct. Cycle threshold. Rq. Relative quantification. A. Average. SD. Standard deviation. R. Reference sample.

| S  |        |        |         |        |       |       |       |         | REC    |        |         |        |       |      |       |         | REC 2  |        |         |        |       |      |      |         |
|----|--------|--------|---------|--------|-------|-------|-------|---------|--------|--------|---------|--------|-------|------|-------|---------|--------|--------|---------|--------|-------|------|------|---------|
| N  | Ct 18S | Wells  | Ct Pant | Wells  | ΔCt   | ΔΔCt  | Rq    | Log2 FC | Ct 18S | Wells  | Ct Pant | Wells  | ΔCt   | ΔΔCt | Rq    | Log2 FC | Ct 18S | Wells  | Ct Pant | Wells  | ΔCt   | ΔΔCt | Rq   | Log2 FC |
| R  | 9.47   | A1A2   | 28.03   | E1E2   | 18.56 | 0.00  | 1.00  | 0.00    | 9.47   | A1A2   | 28.03   | E1E2   | 18.56 | 0.00 | 1.00  | 0.00    | 9.47   | A1A2   | 28.03   | E1E2   | 18.56 | 0.00 | 1.00 | 0.00    |
| 1  | 13.39  | A3A4   | 30.14   | E3E4   | 16.74 | -1.82 | 3.52  | 1.82    | 12.53  | C3C4   | 31.63   | G3G4   | 19.10 | 0.54 | 0.69  | -0.54   | 12.53  | A3A4   | 35.87   | E3E4   | 23.33 | 4.77 | 0.04 | -4.77   |
| 2  | 12.28  | A5A6   | 27.67   | E5E6   | 15.40 | -3.16 | 8.94  | 3.16    | 11.15  | C5C6   | 29.85   | G5G6   | 18.70 | 0.14 | 0.91  | -0.14   | 11.15  | A5A6   | 33.01   | E5E6   | 21.87 | 3.31 | 0.10 | -3.31   |
| 3  | 10.69  | A7A8   | 27.74   | E7E8   | 17.05 | -1.52 | 2.86  | 1.52    | 13.70  | C7C8   | 33.64   | G7G8   | 19.94 | 1.38 | 0.39  | -1.38   | 11.55  | A7A8   | 34.98   | E7E8   | 23.43 | 4.87 | 0.03 | -4.87   |
| 4  | 12.15  | A9A10  | 32.18   | E9E10  | 20.03 | 1.47  | 0.36  | -1.47   | 9.85   | C9C10  | 38.05   | G9G10  | 28.19 | 9.63 | 0.001 | -9.63   | 11.25  | A9A10  | 32.30   | E9E10  | 21.04 | 2.48 | 0.18 | -2.48   |
| 5  | 9.67   | A11A12 | 29.58   | E11E12 | 19.91 | 1.35  | 0.39  | -1.35   | 10.07  | C11C12 | 36.63   | G11G12 | 26.56 | 8.00 | 0.004 | -8.00   | 11.86  | A11A12 | 33.16   | E11E12 | 21.30 | 2.74 | 0.15 | -2.74   |
| 6  | 11.92  | B3B4   | 31.61   | F3F4   | 19.69 | 1.13  | 0.46  | -1.13   | 10.35  | D1D2   | 33.62   | H1H2   | 23.27 | 4.71 | 0.04  | -4.71   | 12.59  | B3B4   | 31.90   | F3F4   | 19.31 | 0.75 | 0.60 | -0.75   |
| 7  | 9.64   | B5B6   | 28.38   | F5F6   | 18.74 | 0.18  | 0.88  | -0.18   | 12.64  | D3D4   | 34.10   | H3H4   | 21.47 | 2.91 | 0.13  | -2.91   | 13.66  | B5B6   | 33.85   | F5F6   | 20.20 | 1.64 | 0.32 | -1.64   |
| 8  | 13.04  | B7B8   | 32.25   | F7F8   | 19.21 | 0.65  | 0.64  | -0.65   | 13.06  | D5D6   | 36.69   | H5H6   | 23.63 | 5.07 | 0.03  | -5.07   | 12.70  | B7B8   | 35.70   | F7F8   | 23.01 | 4.45 | 0.05 | -4.45   |
| 9  | 13.72  | B9B10  | 32.87   | F9F10  | 19.15 | 0.59  | 0.66  | -0.59   | 13.41  | D7D8   | 37.72   | H7H8   | 24.32 | 5.76 | 0.02  | -5.76   | 11.88  | B9B10  | 32.96   | F9F10  | 21.07 | 2.51 | 0.18 | -2.51   |
| 10 | 12.61  | B11B12 | 31.84   | F11F12 | 19.23 | 0.67  | 0.63  | -0.67   | 10.35  | D9D10  | 34.67   | H9H10  | 24.31 | 5.75 | 0.02  | -5.75   | 12.01  | B11B12 | 35.41   | F11F12 | 23.40 | 4.84 | 0.04 | -4.84   |
| 11 | 11.02  | A3A4   | 28.51   | E3E4   | 17.49 | -1.07 | 2.10  | 1.07    | 10.77  | C1C2   | 36.03   | G1G2   | 25.25 | 6.69 | 0.01  | -6.69   | 12.46  | C1C2   | 34.47   | G1G2   | 22.01 | 3.45 | 0.09 | -3.45   |
| 12 | 13.70  | A5A6   | 31.64   | E5E6   | 17.94 | -0.62 | 1.54  | 0.62    | 11.72  | C3C4   | 35.41   | G3G4   | 23.69 | 5.13 | 0.03  | -5.13   | 12.98  | C3C4   | 35.94   | G3G4   | 22.95 | 4.39 | 0.05 | -4.39   |
| 13 | 13.94  | A7A8   | 30.69   | E7E8   | 16.75 | -1.81 | 3.52  | 1.81    | 11.99  | C5C6   | 31.82   | G5G6   | 19.84 | 1.34 | 0.40  | -1.34   | 11.25  | C7C8   | 32.77   | G7G8   | 21.52 | 2.96 | 0.13 | -2.96   |
| 14 | 8.32   | A9A10  | 28.50   | E9E10  | 20.18 | 1.62  | 0.33  | -1.62   | 12.75  | C7C8   | 33.44   | G7G8   | 20.70 | 2.20 | 0.22  | -2.20   | 13.32  | C9C10  | 35.37   | G9G10  | 22.05 | 3.49 | 0.09 | -3.49   |
| 15 | 10.43  | A11A12 | 29.71   | E11E12 | 19.28 | 0.72  | 0.61  | -0.72   | 12.84  | C9C10  | 34.20   | G9G10  | 21.36 | 2.86 | 0.14  | -2.86   | 13.71  | C11C12 | 33.11   | G11G12 | 19.39 | 0.83 | 0.56 | -0.83   |
| 16 | 11.95  | B1B2   | 28.74   | F1F2   | 16.79 | -1.77 | 3.42  | 1.77    | 13.12  | C11C12 | 35.52   | G11G12 | 22.40 | 3.90 | 0.07  | -3.90   | 11.32  | D1D2   | 30.70   | H1H2   | 19.38 | 0.82 | 0.57 | -0.82   |
| 17 | 11.68  | B3B4   | 27.91   | F3F4   | 16.23 | -2.33 | 5.01  | 2.33    | 10.91  | D3D4   | 32.94   | H3H4   | 22.02 | 3.52 | 0.09  | -3.52   | 13.01  | D3D4   | 32.11   | H3H4   | 19.10 | 0.54 | 0.69 | -0.54   |
| 18 | 11.22  | B5B6   | 30.17   | F5F6   | 18.94 | 0.38  | 0.77  | -0.38   | 10.76  | D5D6   | 32.89   | H5H6   | 22.13 | 3.63 | 0.08  | -3.63   | 11.98  | D5D6   | 33.07   | H5H6   | 21.09 | 2.53 | 0.17 | -2.53   |
| 19 | 11.17  | B7B8   | 25.97   | F7F8   | 14.80 | -3.76 | 13.57 | 3.76    | 14.15  | D7D8   | 38.09   | H7H8   | 23.94 | 5.44 | 0.02  | -5.44   | 11.92  | D7D8   | 32.71   | H7H8   | 20.80 | 2.24 | 0.21 | -2.24   |
| 20 | 10.64  | B9B10  | 30.20   | F9F10  | 19.56 | 1.00  | 0.50  | -1.00   | 10.99  | B3B4   | 30.24   | F3F4   | 19.25 | 0.75 | 0.60  | -0.75   | 12.98  | D9D10  | 35.57   | H9H10  | 22.59 | 4.03 | 0.06 | -4.03   |
| 21 | 14.49  | B11B12 | 30.08   | F11F12 | 15.58 | -2.98 | 7.87  | 2.98    | 11.54  | B1B2   | 31.08   | F1F2   | 19.54 | 1.04 | 0.49  | -1.04   | 11.04  | D11D12 | 31.32   | H11H12 | 20.27 | 1.71 | 0.30 | -1.71   |
| 22 | 12.90  | A1A2   | 30.49   | E1E2   | 17.59 | -0.97 | 1.96  | 0.97    | 12.72  | B3B4   | 31.84   | F3F4   | 19.12 | 0.62 | 0.65  | -0.62   | 11.83  | A3A4   | 31.42   | E3E4   | 19.59 | 1.03 | 0.49 | -1.03   |
| 23 | 11.50  | A3A4   | 30.01   | E3E4   | 18.51 | -0.05 | 1.04  | 0.05    | 10.34  | B5B6   | 32.11   | F5F6   | 21.77 | 3.27 | 0.10  | -3.27   | 10.45  | A5A6   | 29.78   | E5E6   | 19.33 | 0.77 | 0.59 | -0.77   |
| 24 | 9.32   | A1A2   | 28.06   | E1E2   | 18.75 | 0.18  | 0.88  | -0.18   | 9.88   | B7B8   | 30.89   | F7F8   | 21.02 | 2.52 | 0.17  | -2.52   | 10.62  | A7A8   | 31.07   | E7E8   | 20.45 | 1.89 | 0.27 | -1.89   |
| 25 | 8.39   | A5A6   | 24.09   | E5E6   | 15.70 | -2.86 | 7.28  | 2.86    | 12.83  | B3B4   | 31.85   | F3F4   | 19.02 | 0.52 | 0.70  | -0.52   | 10.58  | A11A12 | 29.77   | E11E12 | 19.20 | 0.64 | 0.64 | -0.64   |
| 26 | 8.01   | A7A8   | 28.18   | E7E8   | 20.17 | 1.61  | 0.33  | -1.61   | 10.31  | B5B6   | 32.15   | F5F6   | 21.84 | 3.34 | 0.10  | -3.34   | 10.71  | B1B2   | 29.71   | F1F2   | 19.00 | 0.44 | 0.74 | -0.44   |
| 27 | 12.37  | A1A2   | 28.24   | E1E2   | 15.86 | -2.70 | 6.49  | 2.70    | 9.96   | B7B8   | 31.27   | F7F8   | 21.30 | 2.80 | 0.14  | -2.80   | 11.43  | B7B8   | 30.98   | F78    | 19.56 | 1.00 | 0.50 | -1.00   |

|    |       |       |       |       |       |       |       |             |       |       |       |       |       |       |      |              |       |        |       |        |       |      |      |              |
|----|-------|-------|-------|-------|-------|-------|-------|-------------|-------|-------|-------|-------|-------|-------|------|--------------|-------|--------|-------|--------|-------|------|------|--------------|
| 28 | 8.66  | A3A4  | 25.95 | E3E4  | 17.29 | -1.27 | 2.41  | 1.27        | 12.64 | B1B2  | 31.13 | F1F2  | 18.49 | -0.01 | 1.01 | 0.01         | 11.45 | B11B12 | 30.33 | F11F12 | 18.88 | 0.32 | 0.80 | -0.32        |
| 29 | 8.31  | A7A8  | 25.92 | E7E8  | 17.61 | -0.95 | 1.93  | 0.95        | 12.80 | B3B4  | 34.52 | F3F4  | 21.71 | 3.21  | 0.11 | -3.21        | 10.80 | C1C2   | 29.40 | G1G2   | 18.61 | 0.05 | 0.97 | -0.05        |
| 30 | 13.52 | A1A2  | 27.80 | E1E2  | 14.28 | -4.28 | 19.41 | 4.28        | 12.25 | B5B6  | 33.06 | F5F6  | 20.81 | 2.31  | 0.20 | -2.31        | 11.55 | C3C4   | 30.67 | G3G4   | 19.12 | 0.56 | 0.68 | -0.56        |
| 31 | 10.90 | A3A4  | 27.77 | E3E4  | 16.87 | -1.69 | 3.22  | 1.69        | 11.49 | B7B8  | 32.24 | F7F8  | 20.76 | 2.26  | 0.21 | -2.26        | 10.98 | C5C6   | 29.91 | G5G6   | 18.93 | 0.37 | 0.77 | -0.37        |
| 32 | 11.01 | A5A6  | 30.48 | E5E6  | 19.46 | 0.90  | 0.53  | -0.90       | 13.23 | G1G2  | 31.57 | C1C2  | 18.34 | -0.16 | 1.12 | 0.16         | 11.11 | C7C8   | 30.13 | G7G8   | 19.02 | 0.46 | 0.73 | -0.46        |
| 33 | 9.20  | A7A8  | 28.65 | E7E8  | 19.45 | 0.89  | 0.54  | -0.89       | 12.26 | G5G6  | 32.51 | C5C6  | 20.26 | 1.76  | 0.30 | -1.76        | 11.32 | C9C10  | 30.04 | G9G10  | 18.73 | 0.17 | 0.89 | -0.17        |
| 34 | 9.21  | A9A10 | 28.52 | E9E10 | 19.31 | 0.75  | 0.59  | -0.75       | 11.37 | G7G8  | 31.46 | C7C8  | 20.09 | 1.59  | 0.33 | -1.59        |       |        |       |        |       |      |      |              |
| 35 | 10.24 | A1A2  | 27.44 | E1E2  | 17.21 | -1.35 | 2.55  | 1.35        | 10.94 | H3H4  | 32.67 | D3D4  | 21.73 | 3.23  | 0.11 | -3.23        |       |        |       |        |       |      |      |              |
| 36 | 9.93  | A3A4  | 24.81 | E3E4  | 14.87 | -3.69 | 12.87 | 3.69        | 11.27 | H5H6  | 30.80 | D5D6  | 19.54 | 1.04  | 0.49 | -1.04        |       |        |       |        |       |      |      |              |
| 37 | 8.90  | A5A6  | 23.91 | E5E6  | 15.01 | -3.55 | 11.73 | 3.55        | 12.08 | H7H8  | 30.70 | D7D8  | 18.62 | 0.12  | 0.92 | -0.12        |       |        |       |        |       |      |      |              |
| 38 | 9.95  | A7A8  | 24.42 | E7E8  | 14.46 | -4.10 | 17.11 | 4.10        | 12.36 | H9H10 | 32.65 | D9D10 | 20.29 | 1.79  | 0.29 | -1.79        |       |        |       |        |       |      |      |              |
| 39 | 11.04 | E1E2  | 31.52 | A1A2  | 20.48 | 1.92  | 0.26  | -1.92       |       |       |       |       |       |       |      |              |       |        |       |        |       |      |      |              |
| 40 | 10.47 | E3E4  | 30.79 | A3A4  | 20.32 | 1.76  | 0.29  | -1.76       |       |       |       |       |       |       |      |              |       |        |       |        |       |      |      |              |
| 41 | 12.08 | E5E6  | 30.88 | A4A6  | 18.80 | 0.24  | 0.85  | -0.24       |       |       |       |       |       |       |      |              |       |        |       |        |       |      |      |              |
| 42 | 10.93 | E7E8  | 27.36 | A7A8  | 16.44 | -2.12 | 4.36  | 2.12        |       |       |       |       |       |       |      |              |       |        |       |        |       |      |      |              |
| 43 | 10.68 | F1F2  | 29.53 | B1B2  | 18.85 | 0.29  | 0.82  | -0.29       |       |       |       |       |       |       |      |              |       |        |       |        |       |      |      |              |
| 44 | 11.87 | F5F6  | 28.90 | B5B6  | 17.02 | -1.54 | 2.90  | 1.54        |       |       |       |       |       |       |      |              |       |        |       |        |       |      |      |              |
| A  | 11.07 |       | 28.86 |       | 17.80 |       | 3.61  | <b>0.76</b> | 11.77 |       | 33.20 |       | 21.43 |       | 0.30 | <b>-2.91</b> | 11.82 |        | 32.41 |        | 20.59 |      | 0.38 | <b>-2.03</b> |
| SD | 1.68  |       | 2.22  |       | 1.79  |       | 4.68  | <b>1.79</b> | 1.18  |       | 2.20  |       | 2.28  |       | 0.31 | <b>2.27</b>  | 0.90  |        | 2.08  |        | 1.55  |      | 0.29 | <b>1.55</b>  |

**Figure S1.** Principal Component Analysis (PCA) of the expression profile generated by RNA-seq comparing the *Culex quinquefasciatus* larvae from the Bin-resistant strains (REC and REC-2) and the susceptible strain (S). **(A)** Comparison between REC (replicates A11, A12, A13 in red) and S (replicates S1, S2, S3 in blue). **(B)** Comparison between REC-2 (replicates A21, A22, A23 in red) and S (replicates S1, S2, S3 in blue).

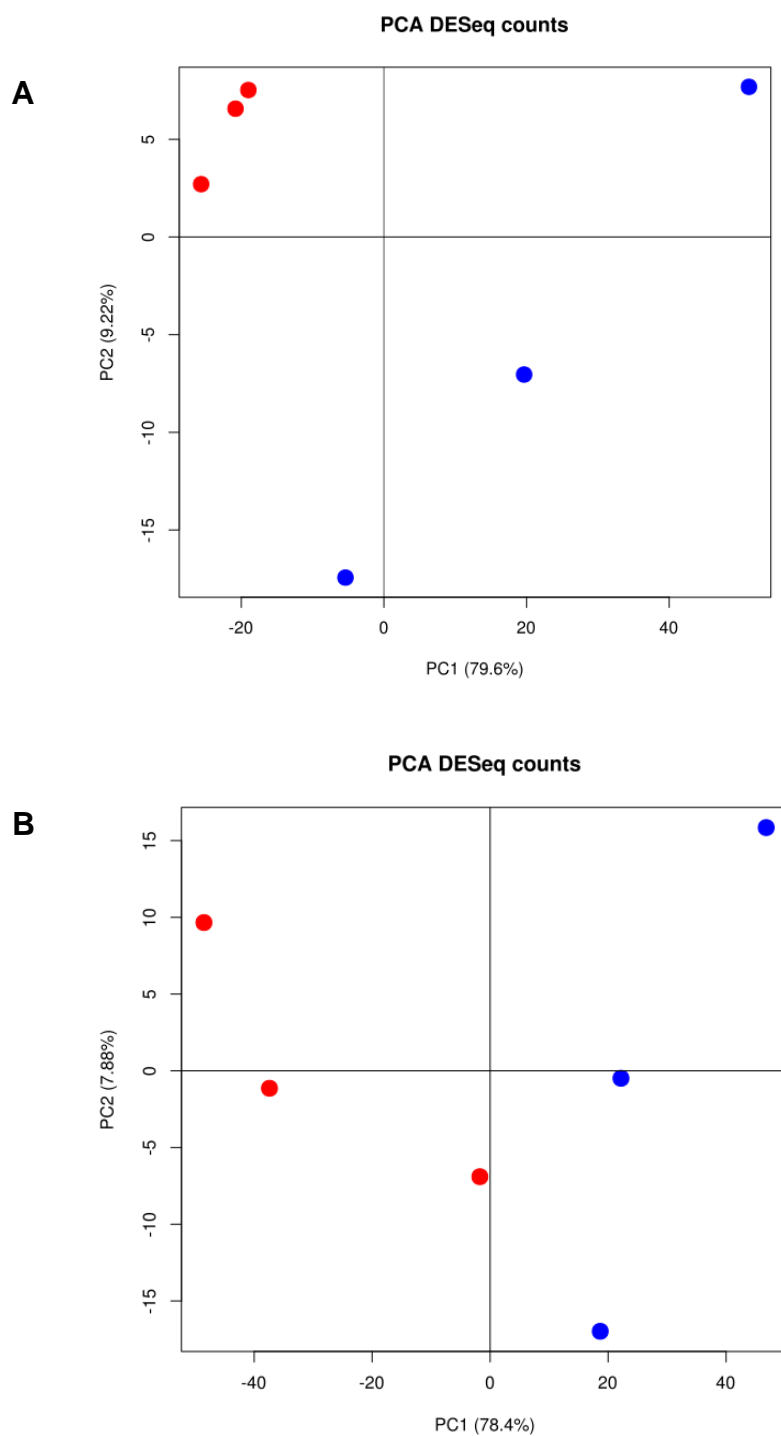

**Figure S2.** Gene enrichment analysis with Gene Ontology (GO) terms and InterPro protein domain descriptions using genes, with Log2 fold change  $\geq 1$  and false discovery rates corrected  $p$ -values  $\leq 0.05$ , found with the two colonies of Bin-resistant *Culex quinquefasciatus* larvae (REC and REC-2) compared to a susceptible colony (S), obtained by RNA-seq. The fold-enrichment of genes in each term is represented by bars and the number of genes is on the right. The complete GO dataset is available in Table S5.

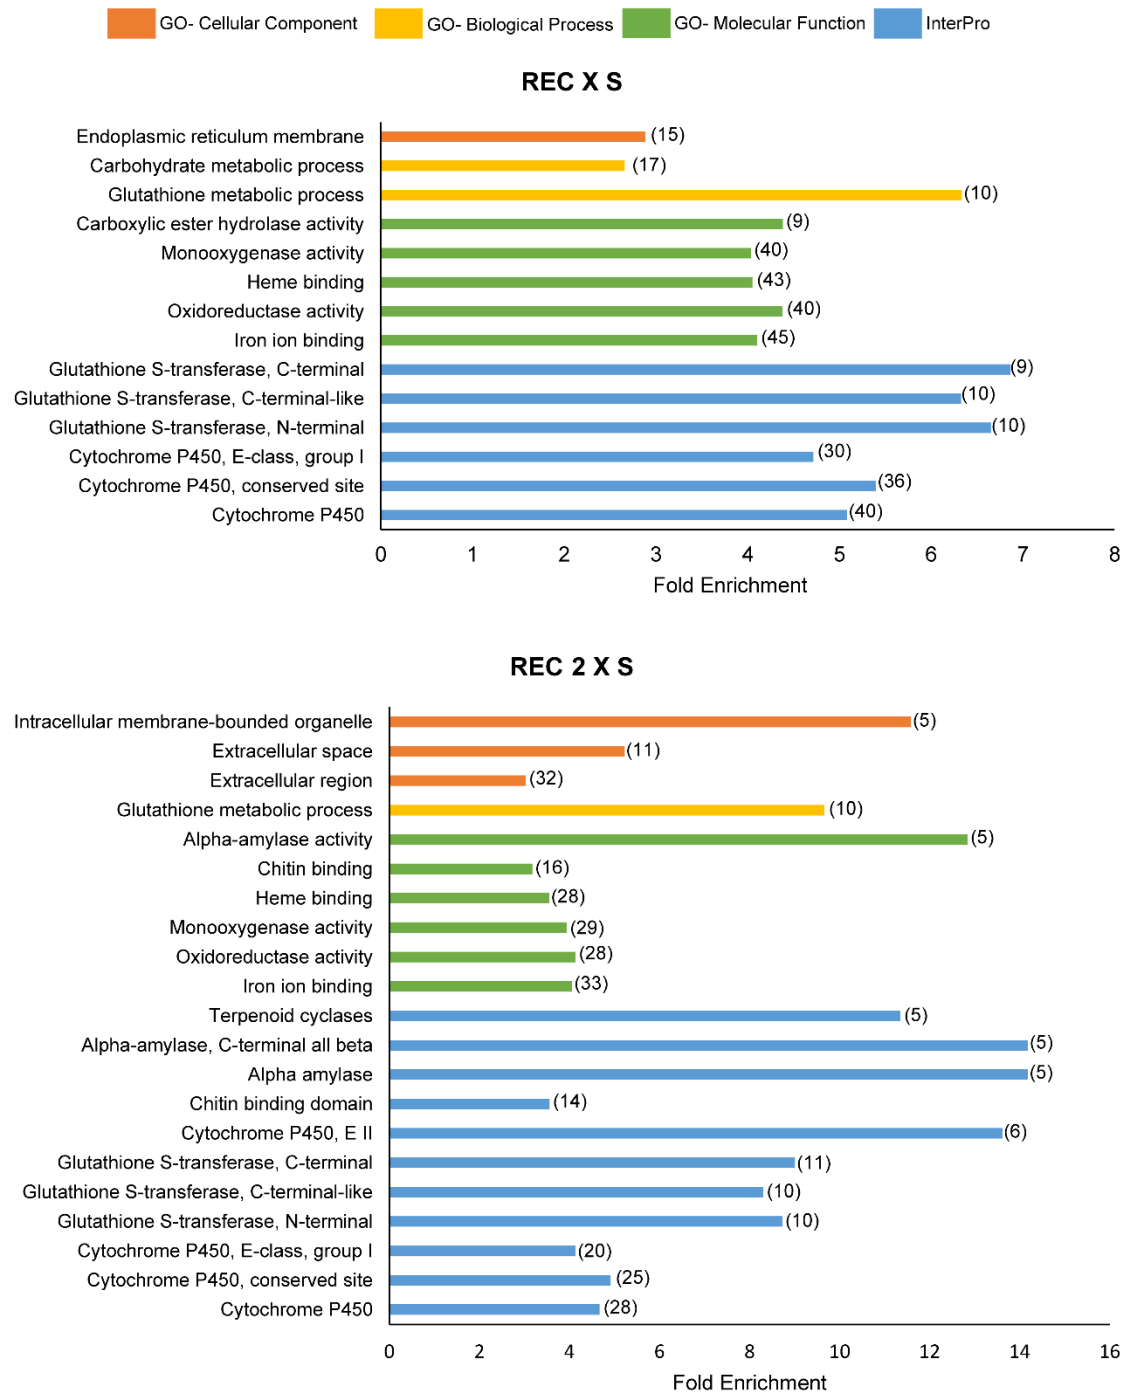

**Figure S3.** Immunodetection of recombinant *Culex quinquefasciatus* pantetheinase (CPIJ017593) produced in *Escherichia coli* (1) and *Sf9* cells (2). Proteins were immunoblotted using polyclonal antibodies raised against the *E. coli* recombinant pantetheinase. Molecular weight markers (kDa) are on the left. Arrows show ~ 70 kDa and ~ 45 kDa proteins.

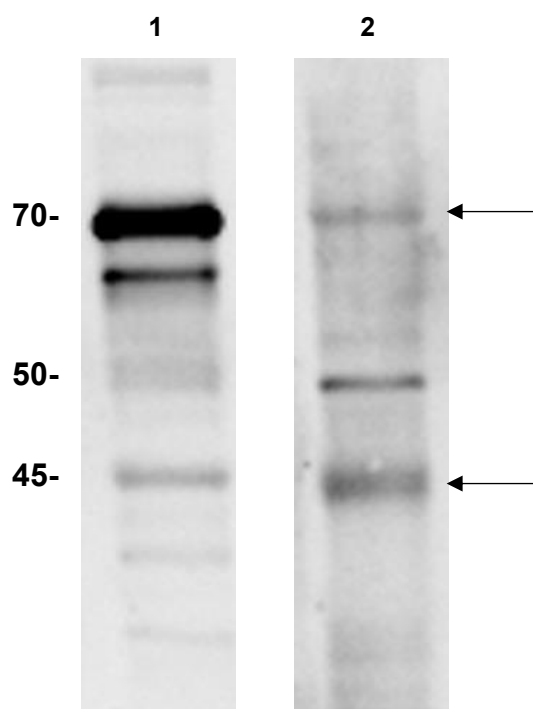



**Figure 6 A and B- Coomassie and Western blot**

**Coomassie (A)**

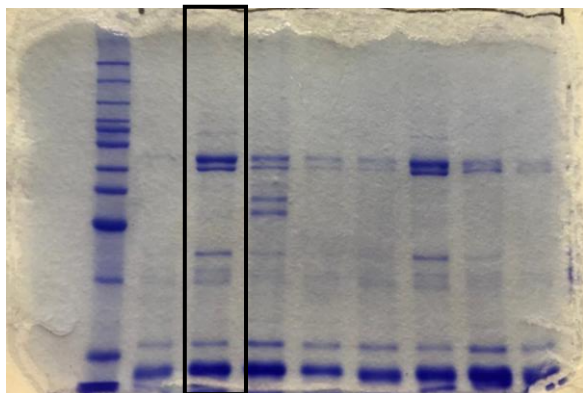

**Anti-His (A)**

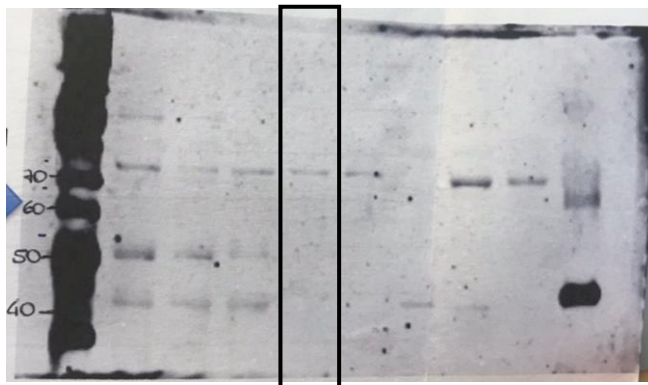

**Anti-Pan (A)**

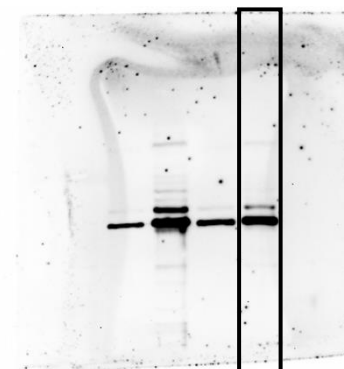

**Coomassie (B)**

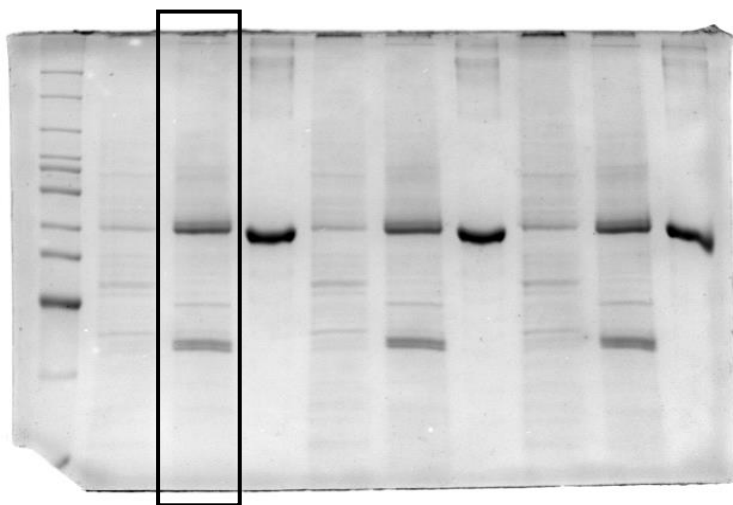

**Anti-His (B)**

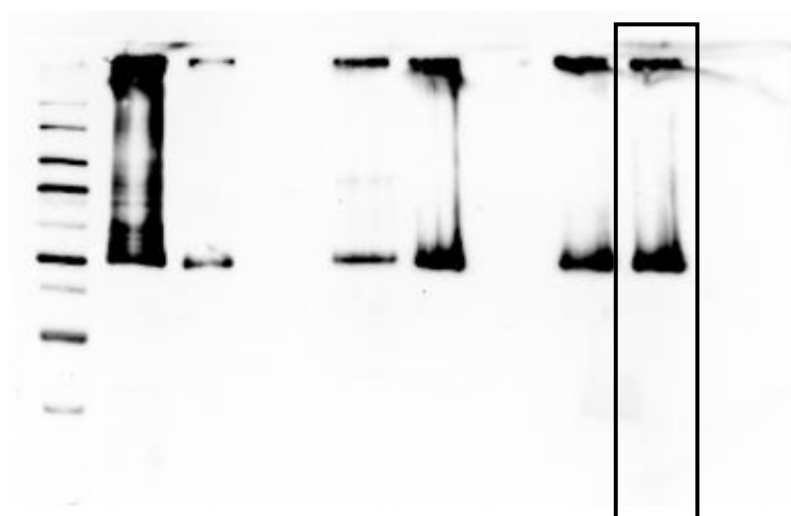

**Anti-Pan (B)**

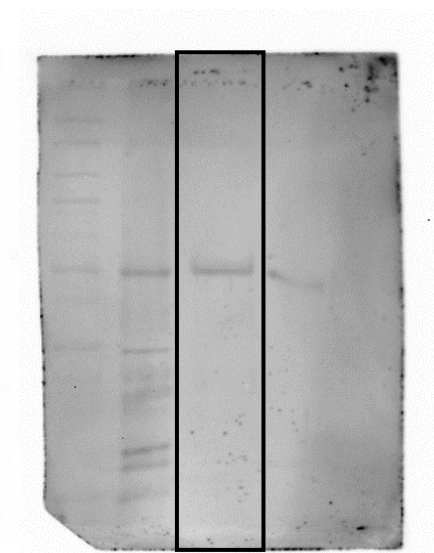

**Figure 6 C- Coomassie (glycosylation)**

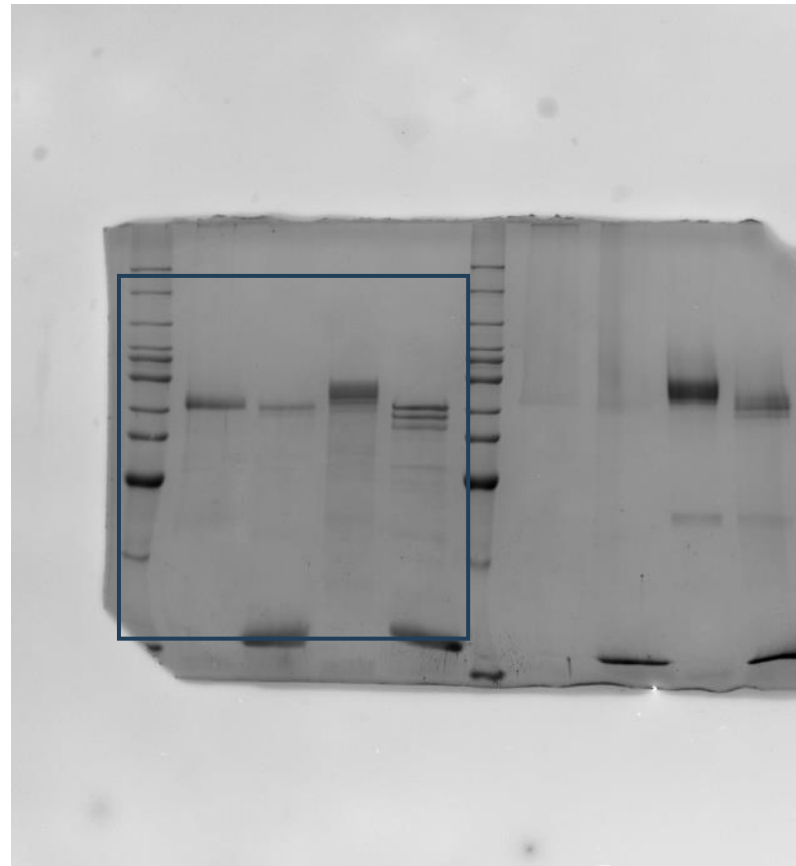

**Figure 7 B- Western blot (BBMF)**

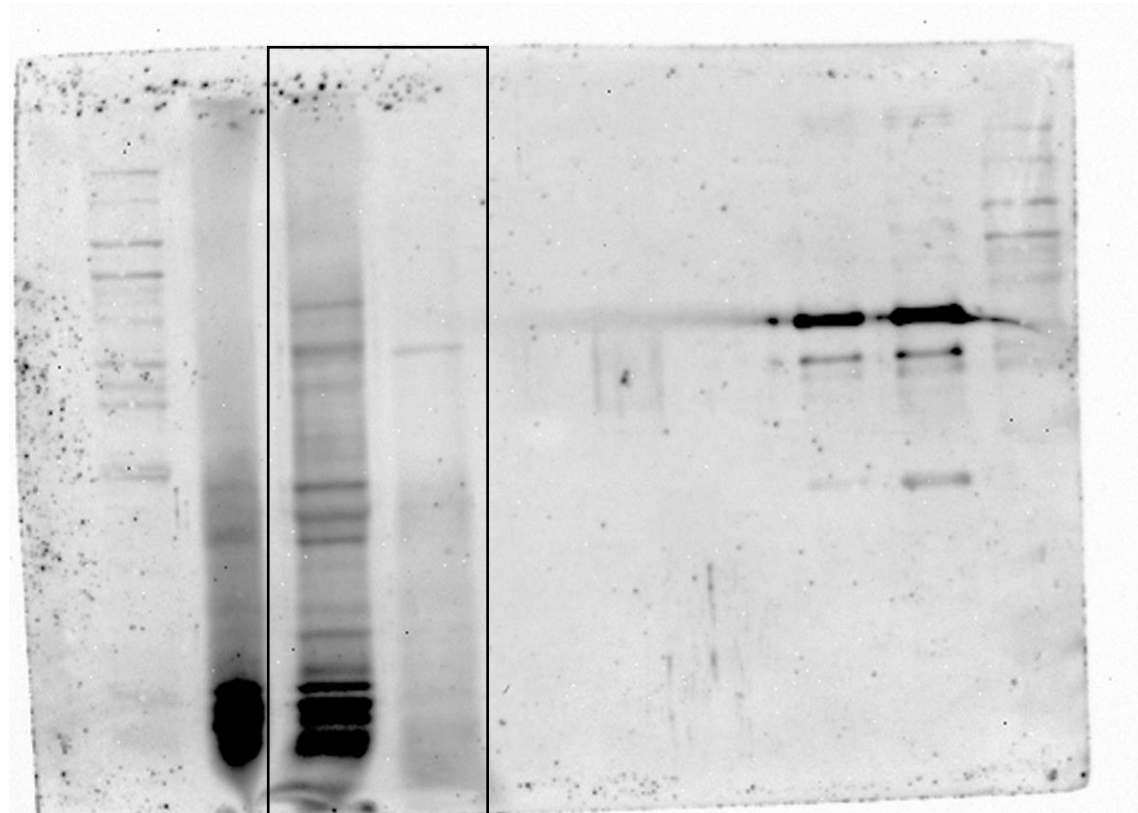

**Figure S3- Western blot (45 kDa protein in SF9 e *E.Coli*)**

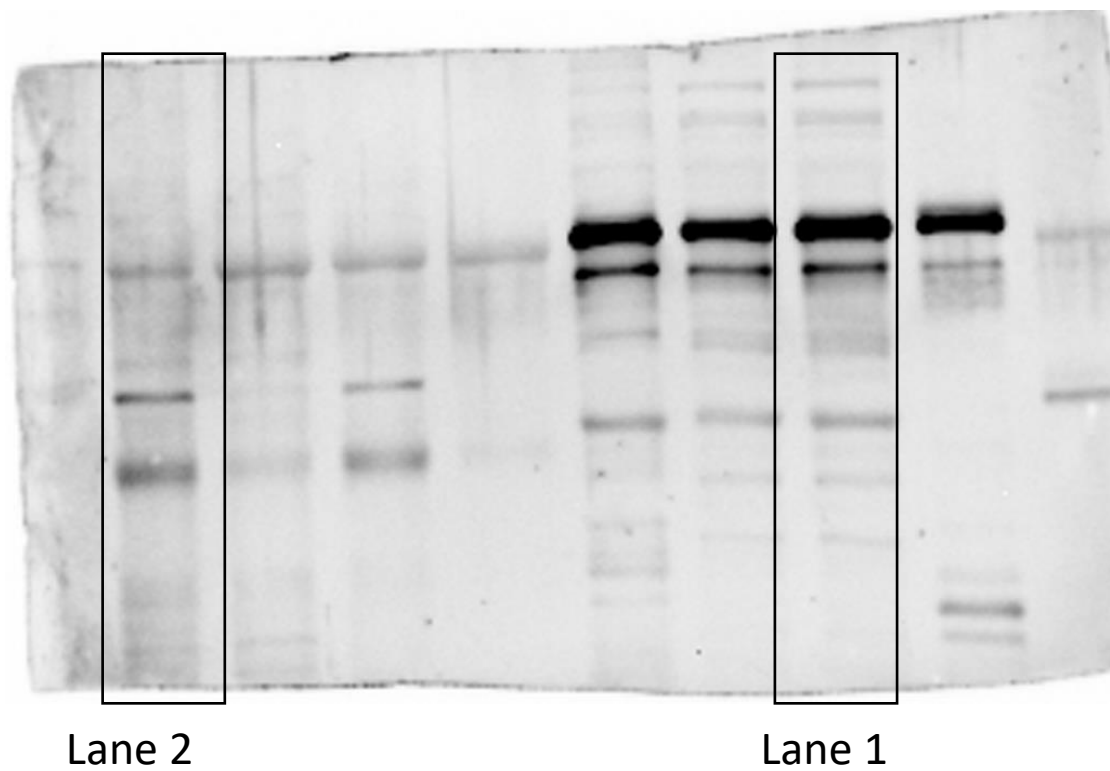

Supplement: s1 [file s1]
